# Supplementary material for: Facile synthesis of isoquinolines and isoquinolineN-oxidesviaa copper-catalyzed intramolecular cyclization in water
Source: Royal Society of Chemistry journal article supplement (doi:10.1039/d2ra06097c), 2022-01-01

## Supporting Information

### Facile Synthesis of Isoquinolines and Isoquinoline *N*-Oxides *via* a Copper-Catalyzed Intramolecular Cyclization in Water

Lujun Zhang, ‡<sup>b</sup> Wenfang Xiong, ‡<sup>c</sup> Biao Yao,<sup>a</sup> Haitao Liu,<sup>b</sup> Meng Li,<sup>a</sup> Yu Qin,<sup>b</sup> Yujian Yu,<sup>b</sup> Xu Li,<sup>b</sup> Meng Chen,<sup>b</sup> Wanqing Wu,<sup>a</sup> Jianxiao Li,<sup>\*a</sup> Jinliang Wang<sup>\*b</sup> and Huanfeng Jiang<sup>\*a</sup>

<sup>a</sup> Key Laboratory of Functional Molecular Engineering of Guangdong Province, School of Chemistry and Chemical Engineering, South China University of Technology, Guangzhou 510640, China

<sup>b</sup> Institute of Chemistry Co. Ltd., Henan Academy of Sciences, Zhengzhou 450000, China

<sup>c</sup> School of Pharmacy, Guangdong Medical University, Dongguan, 523808, China

‡ These authors contributed equally to this work

E-mail: [jianghf@scut.edu.cn](mailto:jianghf@scut.edu.cn)

### List of Contents

|                                                                        |     |
|------------------------------------------------------------------------|-----|
| A. General methods.....                                                | S2  |
| B. Optimization of Reaction Conditions.....                            | S2  |
| C. General Procedure for the Synthesis of Starting Materials .....     | S3  |
| F. Synthetic Procedure for <b>5a</b> , <b>5l</b> , and <b>5p</b> ..... | S6  |
| G. Synthetic Procedure for <b>6a</b> , <b>6l</b> , and <b>6p</b> ..... | S6  |
| H. Synthetic Procedure for <b>7l</b> .....                             | S7  |
| I. Synthetic Procedure for Moxaverine.....                             | S7  |
| J. Crystal structure determination .....                               | S8  |
| K. Analytical Date.....                                                | S12 |
| L. NMR Spectra.....                                                    | S35 |

## A. General methods

$^1\text{H}$ ,  $^{13}\text{C}$  and  $^{19}\text{F}$  NMR spectra were recorded at 400 MHz NMR spectrometer using  $\text{CDCl}_3$  or  $\text{DMSO-}d_6$  as solvent and TMS as an internal standard. Multiplicity was indicated as follows: s (singlet), d (doublet), t (triplet), q (quartet), m (multiplet). Coupling constants were reported in Hertz (Hz). IR spectra were obtained with an infrared spectrometer on either potassium bromide pellets or liquid films between two potassium bromide pellets. HRMS was carried out on a high-resolution mass spectrometer (LCMS-IT-TOF). Melting points were measured using a melting point instrument and were uncorrected. TLC was performed using commercially available 100–400 mesh silica gel plates (GF254). X-ray structural analyses were conducted on an X-ray analysis instrument. Unless otherwise stated, all reagents and solvents were purchased from commercial suppliers and used without further purification.

## B. Optimization of Reaction Conditions

**Table S1.** Optimization of the Reaction Conditions for the Synthesis of Isoquinolines. <sup>[a]</sup>

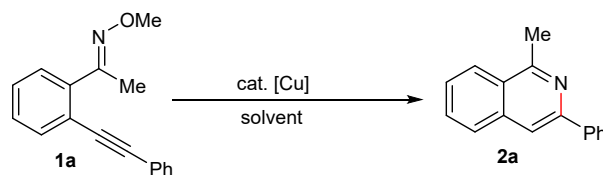

| Entry           | [Cu]                           | Solvent          | Time (h) | Yield <sup>b</sup> (%) |
|-----------------|--------------------------------|------------------|----------|------------------------|
| 1               | CuI (10 mol%)                  | H <sub>2</sub> O | 12       | 91                     |
| 2               | CuI (10 mol%)                  | H <sub>2</sub> O | 15       | 95                     |
| 3               | CuI (5 mol%)                   | H <sub>2</sub> O | 15       | 88                     |
| 4               | CuI (2.5 mol%)                 | H <sub>2</sub> O | 15       | 76                     |
| 5               | —                              | H <sub>2</sub> O | 15       | NR                     |
| 6               | CuBr (10 mol%)                 | H <sub>2</sub> O | 15       | 73                     |
| 7               | CuCl (10 mol%)                 | H <sub>2</sub> O | 15       | 46                     |
| 8               | CuBr <sub>2</sub> (10 mol%)    | H <sub>2</sub> O | 15       | 43                     |
| 9               | Cu(OAc) <sub>2</sub> (10 mol%) | H <sub>2</sub> O | 15       | NR                     |
| 10 <sup>c</sup> | CuI (10 mol%)                  | H <sub>2</sub> O | 15       | 48                     |
| 11 <sup>d</sup> | CuI (10 mol%)                  | H <sub>2</sub> O | 7        | 92                     |
| 12 <sup>e</sup> | CuI (10 mol%)                  | H <sub>2</sub> O | 15       | 95                     |
| 13              | CuI (10 mol%)                  | 1,4-dioxane      | 12       | 87                     |
| 14              | CuI (10 mol%)                  | toluene          | 12       | 28                     |
| 15              | CuI (10 mol%)                  | EtOH             | 12       | 65                     |
| 16              | CuI (10 mol%)                  | AcOH             | 12       | Trace                  |

<sup>a</sup>Reaction condition: **1a** (0.5 mmol), [Cu] (10 mol%), and solvent (2 mL) at 80 °C in a sealed tube, and reaction time as specified. <sup>b</sup>Isolated yields. <sup>c</sup>70 °C. <sup>d</sup>90 °C. <sup>e</sup>Under the nitrogen atmosphere.

**Table S2.** Optimization of the Reaction Conditions<sup>a</sup> for the Synthesis of Isoquinoline N-Oxides. [<sup>a</sup>]

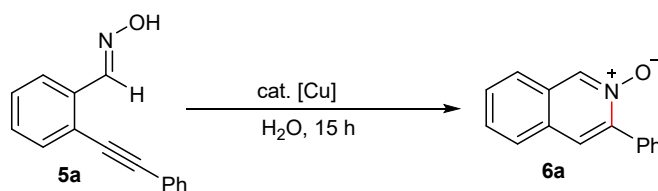

| Entry          | [Cu]              | Temperature (°C) | Time (h) | Yield <sup>b</sup> (%) |
|----------------|-------------------|------------------|----------|------------------------|
| 1              | CuI               | 50               | 15       | NR                     |
| 2              | CuI               | 70               | 15       | 85                     |
| 3              |                   | 70               | 15       | NR                     |
| 4              | CuBr              | 70               | 15       | 51                     |
| 5              | CuCl              | 70               | 15       | 35                     |
| 6              | CuBr <sub>2</sub> | 70               | 15       | 70                     |
| 7 <sup>c</sup> | CuI               | 70               | 15       | 84                     |

<sup>a</sup>Reaction condition: **1a** (0.5 mmol), [Cu] (10 mol%), and solvent (2 mL) at 70 °C in a sealed tube, and reaction time as specified. <sup>b</sup>Isolated yields. <sup>c</sup>Under the nitrogen atmosphere.

### C. General Procedure for the Synthesis of Starting Materials

Unless otherwise specified, (*E*)-2-alkynylaryl oxime derivatives (**1a**, **1v** and **5z** were selected as examples) were synthesized *via* the following step:

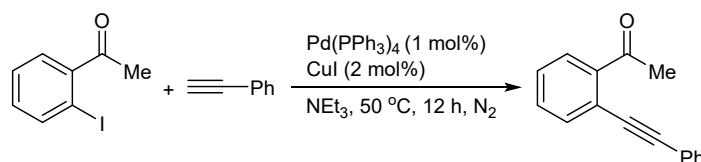

Under the nitrogen atmosphere, 2'-iodoacetophenone (2.46 g, 10 mmol), phenylacetylene (1.12 g, 11 mmol), Pd(PPh<sub>3</sub>)<sub>4</sub> (116 mg, 0.1 mmol), CuI (38 mg, 0.2 mmol), and triethylamine (20 mL) were added in sequence, and then stirred at 50 °C for 12 h. Subsequently, the reaction mixture was quenched with an aqueous solution of saturated NH<sub>4</sub>Cl and extracted with ethyl acetate. The organic layer was washed with water and brine, then dried over Na<sub>2</sub>SO<sub>4</sub>, filtered and concentrated under reduced pressure. The crude product was further purified through column chromatography to obtain a yellow liquid (2.06 g, 93%).

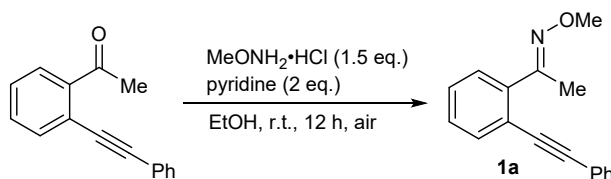

1-[2-(2-Phenylethynyl)phenyl]ethanone (1.10 g, 5 mmol) was first dissolved in ethanol (10 mL). Then, pyridine (791 mg, 10 mmol) and methoxyammonium chloride (626 mg, 7.5 mmol) were added to the resulting solution subsequently and the mixture was stirred at room temperature for 12 h. Subsequently, the reaction mixture was extracted with ethyl acetate. The organic layer was washed with water and brine, then dried over Na<sub>2</sub>SO<sub>4</sub>, filtered and concentrated under reduced pressure. The crude product was further purified through column chromatography to obtain a yellow liquid **1a** (935 mg, 75%).

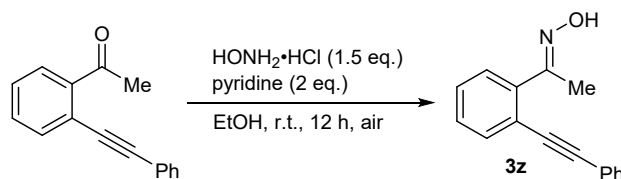

1-[2-(2-Phenylethynyl)phenyl]ethanone (881 mg, 4 mmol) was first dissolved in ethanol (8 mL). Then, pyridine (633 mg, 8 mmol) and hydroxylamine hydrochloride (417 mg, 6 mmol) were added to the resulting solution subsequently and the mixture was stirred at room temperature for 12 h. Subsequently, the reaction mixture was extracted with ethyl acetate. The organic layer was washed with water and brine, then dried over Na<sub>2</sub>SO<sub>4</sub>, filtered and concentrated under reduced pressure. The crude product was further purified through column chromatography to obtain a white solid **5z** (894 mg, 95%).

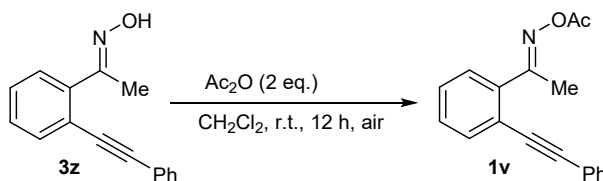

Compound **5z** (471 mg, 2 mmol) was first dissolved in dichloromethane (5 mL). Then, acetic anhydride (408 mg, 4 mmol) was added to the resulting solution and the mixture was stirred at room temperature for 12 h. Subsequently, water (5 mL) was added to the reaction mixture. The organic layer was washed with water and brine, then dried over Na<sub>2</sub>SO<sub>4</sub>, filtered and concentrated under reduced pressure. The crude product was further purified through column chromatography to obtain a white solid **5z** (521 mg, 94%).

#### D. General Procedure for the Synthesis of Isoquinolines and Isoquinoline *N*-Oxides

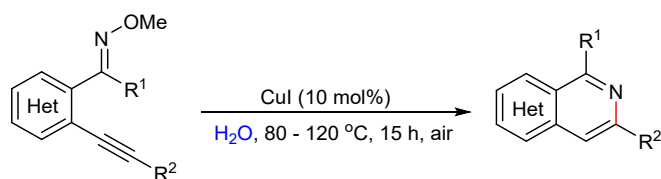

The (*E*)-2-alkynylaryl ketone *O*-methyl oximes **1a-1u** (0.5 mmol) or (*E*)-2-alkynylaryl aldehyde *O*-

methyl oximes **1aa-1ah** (0.5 mmol), CuI (9.5 mg, 0.05 mmol), and H<sub>2</sub>O (2 mL) were added to a tube equipped with a stir bar and stirred at 80-100 °C for 15 h. Then the reaction mixture was extracted with ethyl acetate, dried over anhydrous Na<sub>2</sub>SO<sub>4</sub>, filtered, and evaporated under vacuum. The crude product was purified by column chromatography on silica gel with petroleum ether/ethyl acetate as eluent to afford the desired products **2a-2u** and **2aa-2ah**.

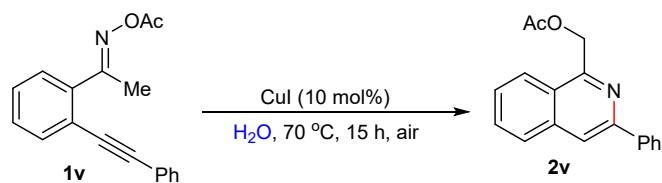

The *N*-Acetoxy imine **1v** (139 mg, 0.5 mmol), CuI (9.5 mg, 0.05 mmol), and H<sub>2</sub>O (2 mL) were added to a tube equipped with a stir bar and stirred at 70 °C for 15 h. Then the reaction mixture was extracted with ethyl acetate, dried over anhydrous Na<sub>2</sub>SO<sub>4</sub>, filtered, and evaporated under vacuum. The crude product was purified by column chromatography on silica gel with petroleum ether/ethyl acetate as eluent to afford the desired product **2v**.

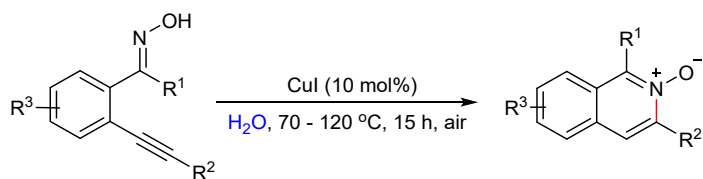

The (*E*)-2-alkynylaryl oximes **3a-3z** (0.5 mmol), CuI (9.5 mg, 0.05 mmol), and H<sub>2</sub>O (2 mL) were added to a tube equipped with a stir bar and stirred at 70-120 °C for 15 h. Then the reaction mixture was extracted with ethyl acetate, dried over anhydrous Na<sub>2</sub>SO<sub>4</sub>, filtered, and evaporated under vacuum. The crude product was purified by column chromatography on silica gel with ethyl acetate as eluent to afford the desired products **4a-4z**.

## E. Gram Scale Experiments

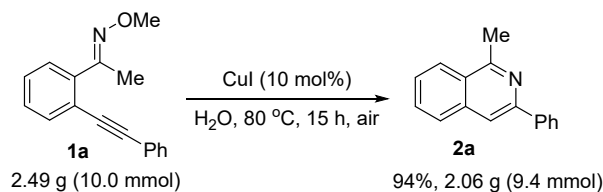

The (*E*)-2-alkynylaryl ketone *O*-methyl oxime **1a** (2.49 g, 10 mmol), CuI (190 mg, 1 mmol), and H<sub>2</sub>O (20 mL) were added to a tube equipped with a stir bar and stirred at 80 °C for 15 h. Then the reaction mixture was extracted with ethyl acetate, dried over anhydrous Na<sub>2</sub>SO<sub>4</sub>, filtered, and evaporated under vacuum. The crude product was purified by column chromatography on silica gel with petroleum ether/ethyl acetate as

eluent to afford the desired products **2a** (2.06 g, 94%).

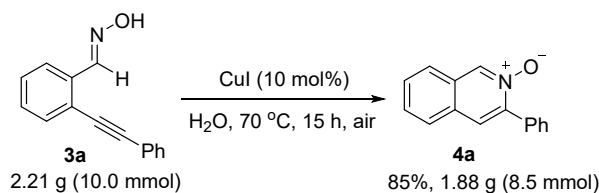

The (*E*)-2-alkynylaryl oxime **3a** (2.21 g, 10 mmol), CuI (190 mg, 1 mmol), and H<sub>2</sub>O (20 mL) were added to a tube equipped with a stir bar and stirred at 70 °C for 15 h. Then the reaction mixture was extracted with ethyl acetate, dried over anhydrous Na<sub>2</sub>SO<sub>4</sub>, filtered, and evaporated under vacuum. The crude product was purified by column chromatography on silica gel with ethyl acetate as eluent to afford the desired products **4a** (1.88 g, 85%).

#### F. Synthetic Procedure for **5a**, **5l**, and **5p**

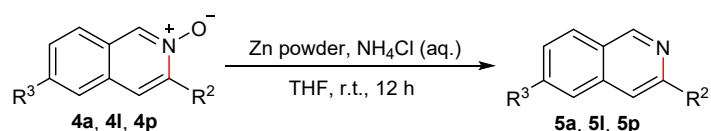

Isoquinoline *N*-oxides (0.2 mmol) was first dissolved in THF (2 mL). Then, Zn powder (131 mg, 2 mmol) and an aqueous solution of saturated NH<sub>4</sub>Cl (2 mL) were added to the resulting solution subsequently and the mixture was stirred at room temperature for 12 h. Subsequently, the reaction mixture was extracted with ethyl acetate. The organic layer was washed with water and brine, then dried over Na<sub>2</sub>SO<sub>4</sub>, filtered and concentrated under reduced pressure. The crude product was further purified through column chromatography to obtain isoquinolines **5a**, **5l**, and **5p**.

#### G. Synthetic Procedure for **6a**, **6l**, and **6p**

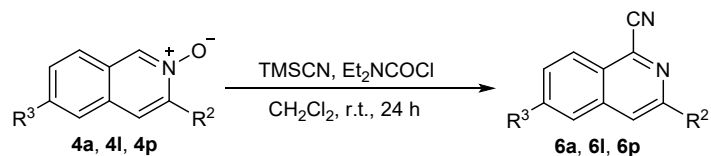

The **4a**, **4l** and **4p** were prepared according to the reported procedure [Org. Chem. Front., 2015, 2, 819–822.]. To a solution of isoquinoline *N*-oxides (0.5 mmol) in CH<sub>2</sub>Cl<sub>2</sub> (5 mL) was added trimethylsilyl cyanide (248 mg, 2.5 mmol). Then a solution of diethylcarbonyl chloride (339 mg, 2.5 mmol) in CH<sub>2</sub>Cl<sub>2</sub> (10 mL) was slowly added in 10 min, and the reaction mixture was stirred at room temperature for 24 h. After K<sub>2</sub>CO<sub>3</sub> (10 mL, 10 % aq.) was added, the mixture was extracted several times with CH<sub>2</sub>Cl<sub>2</sub>. The combined organic phases were washed with water and then dried over Na<sub>2</sub>SO<sub>4</sub>. The organic phase was concentrated and

purified by silica gel chromatography to afford the products **6a**, **6l** and **6p**.

## H. Synthetic Procedure for **7l**

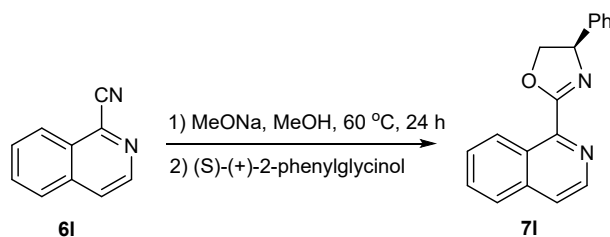

The **6l** was prepared according to the reported procedure [Org. Chem. Front., 2015, 2, 819–822.]. To a stirred solution of **6l** (154 mg, 1 mmol) in MeOH (5 mL), NaOMe (18 mg, 0.3 mmol) was added under nitrogen. The mixture was stirred at 60 °C for 24 h. The solvent was removed under vacuum, and the residue was then dissolved in 10 mL of ethyl acetate and then washed with water and brine. The organic phase was separated and dried over Na<sub>2</sub>SO<sub>4</sub>. After removal of the solvent, the crude product was dissolved in dry THF (5 mL). (S)-(+)-2-Phenylglycinol (137 mg, 1 mmol) and HCl (1 drop, 33% aq.) were added, and the mixture was refluxed under nitrogen atmosphere. After 12 h, the mixture was diluted with water (20 mL) and extracted with ethyl acetate. The combined organic phases were washed with water and then dried over Na<sub>2</sub>SO<sub>4</sub>. After the removal of solvent under reduced pressure, the residue was purified by silica gel chromatography to afford product **7l** as a pale-yellow oil (82 mg, 30%).

## I. Synthetic Procedure for Moxaverine

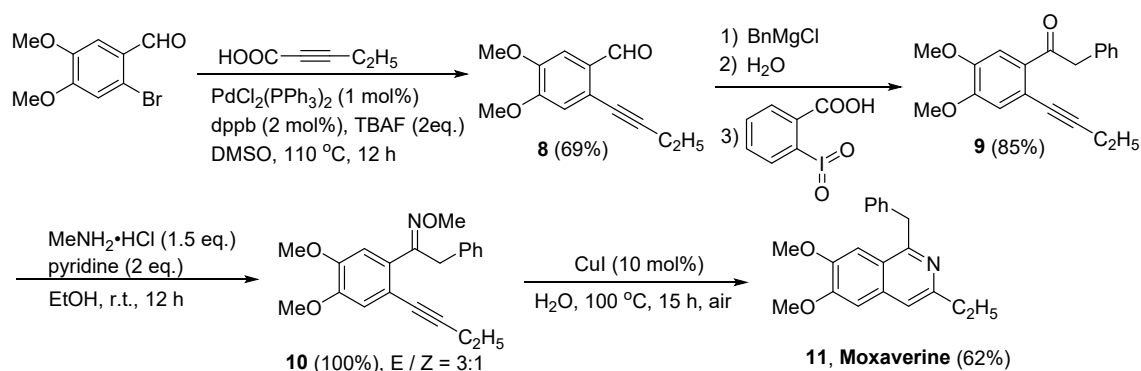

The alkyne **8** was prepared according to the reported procedure [Angew. Chem. 2015, 127, 13115–13119.]. To a 50 mL Schlenk tube, 6-bromoveratraldehyde (2.45 g, 10.0 mmol), 2-pentynoic acid (1.03 g, 10.5 mmol), PdCl<sub>2</sub>(PPh<sub>3</sub>)<sub>2</sub> (70 mg, 0.1 mmol), 1,4-bis(diphenylphosphino)butane (dppb) (85 mg, 0.2 mmol), TBAF (1 M in THF, 20 mL, 20 mmol), and DMSO (15 mL) were added. The resulting mixture was stirred under nitrogen at 110 °C for 12 h. After cooling to room temperature, the reaction mixture was quenched with an aqueous

solution of saturated  $\text{NH}_4\text{Cl}$  and extracted with ethyl acetate. The organic layer was washed with water and brine, then dried over  $\text{Na}_2\text{SO}_4$ , filtered and concentrated under reduced pressure. The crude product was further purified through column chromatography to obtain alkyne **8** as a yellow liquid (1.51 g, 69%).

Under the nitrogen atmosphere, benzylmagnesium chloride (1.0 M in THF, 6.0 mL, 6.0 mmol) was added dropwise to a stirred solution of alkyne **8** (1.09 g, 5 mmol) in THF (10 mL) at  $-40\text{ }^\circ\text{C}$ . After 30 min, the reaction was warmed to room temperature and stirred for 12 h. The reaction mixture was quenched with an aqueous solution of saturated  $\text{NH}_4\text{Cl}$  and extracted with ethyl acetate. The organic layer was washed with water and brine, then dried over  $\text{Na}_2\text{SO}_4$ , filtered and concentrated under reduced pressure. The crude product was then dissolved in DMSO (15 mL). 2-Iodoxybenzoic acid (1.40 g, 5 mmol) was added, and the reaction mixture was stirred at room temperature for 12 h. Then the reaction mixture was diluted with an aqueous solution of saturated  $\text{NH}_4\text{Cl}$  and extracted with ethyl acetate. The organic layer was washed with water and brine, then dried over  $\text{Na}_2\text{SO}_4$ , filtered and concentrated under reduced pressure. The crude product was further purified through column chromatography to obtain a white solid **9** (1.31 g, 85 %).

The intermediate product **9** (1.23 g, 4 mmol) was first dissolved in ethanol (10 mL). Then, pyridine (633 mg, 8 mmol) and methoxyammonium chloride (501 mg, 6 mmol) were added to the resulting solution subsequently and the mixture was stirred at room temperature for 12 h. Subsequently, the reaction mixture was extracted with ethyl acetate. The organic layer was washed with water and brine, then dried over  $\text{Na}_2\text{SO}_4$ , filtered and concentrated under reduced pressure. The crude product was further purified through column chromatography to obtain a yellow liquid **10** (1.35 g, 100%,  $E/Z=3:1$ ).

The 2-alkynylaryl ketone *O*-methyl oxime **10** (169 mg, 0.5 mmol),  $\text{CuI}$  (9.5 mg, 0.05 mmol), and  $\text{H}_2\text{O}$  (2 mL) were added to a tube equipped with a stir bar and stirred at  $100\text{ }^\circ\text{C}$  for 15 h. Then the reaction mixture was extracted with ethyl acetate, dried over anhydrous  $\text{Na}_2\text{SO}_4$ , filtered, and evaporated under vacuum. The crude product was purified by column chromatography on silica gel with petroleum ether/ethyl acetate as eluent to afford the moxaverine as a pale-yellow oil (72 mg, 62%).

## J. Crystal structure determination

I. ORTEP representation with 50% probability thermal ellipsoids. Crystal data have been deposited to CCDC, number 2097802.



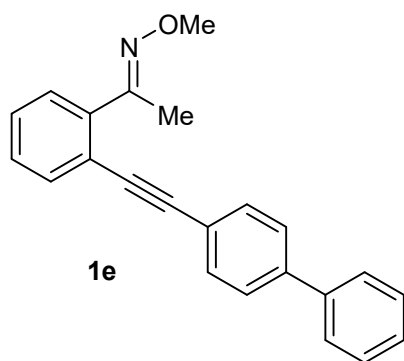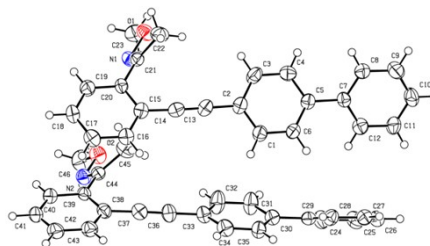

X-ray of **1e**  
CCDC 2097802

|                                             |                                                               |
|---------------------------------------------|---------------------------------------------------------------|
| Empirical formula                           | C <sub>23</sub> H <sub>19</sub> NO                            |
| Formula weight                              | 325.39                                                        |
| Temperature/K                               | 170.0                                                         |
| Crystal system                              | triclinic                                                     |
| Space group                                 | P-1                                                           |
| a/Å                                         | 10.4869(10)                                                   |
| b/Å                                         | 10.7023(11)                                                   |
| c/Å                                         | 16.7778(18)                                                   |
| α/°                                         | 85.624(3)                                                     |
| β/°                                         | 82.721(3)                                                     |
| γ/°                                         | 72.345(3)                                                     |
| Volume/Å <sup>3</sup>                       | 1778.5(3)                                                     |
| Z                                           | 4                                                             |
| ρ <sub>calc</sub> /g/cm <sup>3</sup>        | 1.215                                                         |
| μ/mm <sup>-1</sup>                          | 0.074                                                         |
| F(000)                                      | 688.0                                                         |
| Crystal size/mm <sup>3</sup>                | 0.11 × 0.04 × 0.02                                            |
| Radiation                                   | MoKα (λ = 0.71073)                                            |
| 2θ range for data collection/°              | 3.998 to 50.052                                               |
| Index ranges                                | -11 ≤ h ≤ 12, -12 ≤ k ≤ 12, -19 ≤ l ≤ 19                      |
| Reflections collected                       | 18380                                                         |
| Independent reflections                     | 6253 [R <sub>int</sub> = 0.1167, R <sub>sigma</sub> = 0.1498] |
| Data/restraints/parameters                  | 6253/0/455                                                    |
| Goodness-of-fit on F <sup>2</sup>           | 1.030                                                         |
| Final R indexes [I ≥ 2σ (I)]                | R <sub>1</sub> = 0.0766, wR <sub>2</sub> = 0.1380             |
| Final R indexes [all data]                  | R <sub>1</sub> = 0.2061, wR <sub>2</sub> = 0.1993             |
| Largest diff. peak/hole / e Å <sup>-3</sup> | 0.24/-0.25                                                    |

II. ORTEP representation with 50% probability thermal ellipsoids. Crystal data have been deposited to CCDC, number 2095902.

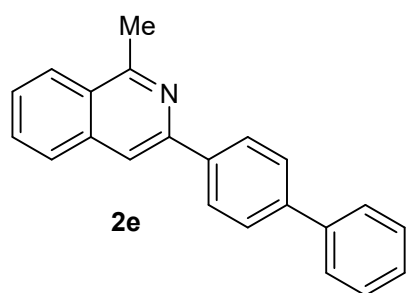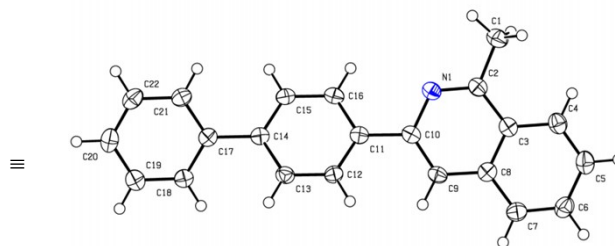

X-ray of **2e**  
CCDC 2095902

|                                             |                                                               |
|---------------------------------------------|---------------------------------------------------------------|
| Empirical formula                           | C <sub>22</sub> H <sub>17</sub> N                             |
| Formula weight                              | 295.36                                                        |
| Temperature/K                               | 140.0                                                         |
| Crystal system                              | monoclinic                                                    |
| Space group                                 | P2 <sub>1</sub> /n                                            |
| a/Å                                         | 7.0452(9)                                                     |
| b/Å                                         | 9.2637(12)                                                    |
| c/Å                                         | 23.462(4)                                                     |
| α/°                                         | 90                                                            |
| β/°                                         | 90.102(2)                                                     |
| γ/°                                         | 90                                                            |
| Volume/Å <sup>3</sup>                       | 1531.2(4)                                                     |
| Z                                           | 4                                                             |
| ρ <sub>calc</sub> /cm <sup>3</sup>          | 1.281                                                         |
| μ/mm <sup>-1</sup>                          | 0.074                                                         |
| F(000)                                      | 624.0                                                         |
| Crystal size/mm <sup>3</sup>                | 0.15 × 0.08 × 0.05                                            |
| Radiation                                   | MoKα (λ = 0.71073)                                            |
| 2θ range for data collection/°              | 4.728 to 52.962                                               |
| Index ranges                                | -8 ≤ h ≤ 8, -10 ≤ k ≤ 11, -29 ≤ l ≤ 27                        |
| Reflections collected                       | 11289                                                         |
| Independent reflections                     | 3117 [R <sub>int</sub> = 0.0581, R <sub>sigma</sub> = 0.0586] |
| Data/restraints/parameters                  | 3117/0/209                                                    |
| Goodness-of-fit on F <sup>2</sup>           | 1.021                                                         |
| Final R indexes [I ≥ 2σ (I)]                | R <sub>1</sub> = 0.0506, wR <sub>2</sub> = 0.1114             |
| Final R indexes [all data]                  | R <sub>1</sub> = 0.0822, wR <sub>2</sub> = 0.1330             |
| Largest diff. peak/hole / e Å <sup>-3</sup> | 0.21/-0.20                                                    |

I. ORTEP representation with 50% probability thermal ellipsoids. Crystal data have been deposited to CCDC, number 2128901.

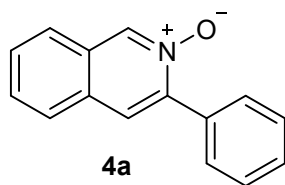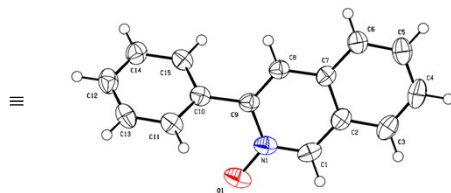

**X-ray of 4a**  
**CCDC 2128901**

|                                             |                                                               |
|---------------------------------------------|---------------------------------------------------------------|
| Empirical formula                           | C <sub>15</sub> H <sub>11</sub> NO                            |
| Formula weight                              | 221.25                                                        |
| Temperature/K                               | 170.0                                                         |
| Crystal system                              | monoclinic                                                    |
| Space group                                 | C2/c                                                          |
| a/Å                                         | 18.473(2)                                                     |
| b/Å                                         | 6.0831(6)                                                     |
| c/Å                                         | 19.451(2)                                                     |
| α/°                                         | 90                                                            |
| β/°                                         | 100.583(6)                                                    |
| γ/°                                         | 90                                                            |
| Volume/Å <sup>3</sup>                       | 2148.5(4)                                                     |
| Z                                           | 8                                                             |
| ρ <sub>calc</sub> /g/cm <sup>3</sup>        | 1.368                                                         |
| μ/mm <sup>-1</sup>                          | 0.086                                                         |
| F(000)                                      | 928.0                                                         |
| Crystal size/mm <sup>3</sup>                | 0.12 × 0.08 × 0.05                                            |
| Radiation                                   | MoKα (λ = 0.71073)                                            |
| 2θ range for data collection/°              | 4.26 to 53.03                                                 |
| Index ranges                                | -22 ≤ h ≤ 22, -7 ≤ k ≤ 6, -24 ≤ l ≤ 23                        |
| Reflections collected                       | 9320                                                          |
| Independent reflections                     | 2200 [R <sub>int</sub> = 0.0738, R <sub>sigma</sub> = 0.0702] |
| Data/restraints/parameters                  | 2200/0/154                                                    |
| Goodness-of-fit on F <sup>2</sup>           | 1.033                                                         |
| Final R indexes [I >= 2σ (I)]               | R <sub>1</sub> = 0.0617, wR <sub>2</sub> = 0.1386             |
| Final R indexes [all data]                  | R <sub>1</sub> = 0.1303, wR <sub>2</sub> = 0.1769             |
| Largest diff. peak/hole / e Å <sup>-3</sup> | 0.18/-0.20                                                    |

II. ORTEP representation with 50% probability thermal ellipsoids. Crystal data have been deposited to CCDC, number 2142641.

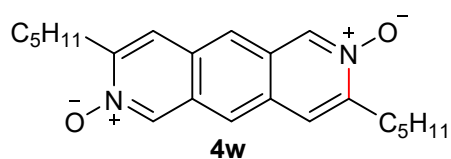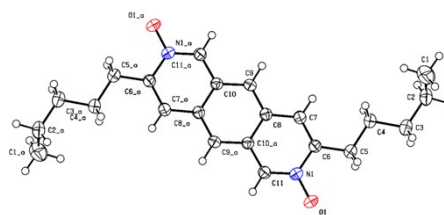

X-ray of **4w**  
CCDC 2142641

|                                                |                                                                  |
|------------------------------------------------|------------------------------------------------------------------|
| Empirical formula                              | $C_{22}H_{28}N_2O_2$                                             |
| Formula weight                                 | 352.46                                                           |
| Temperature/K                                  | 150.0                                                            |
| Crystal system                                 | trigonal                                                         |
| Space group                                    | R-3                                                              |
| a/Å                                            | 22.8147(12)                                                      |
| b/Å                                            | 22.8147(12)                                                      |
| c/Å                                            | 10.5217(7)                                                       |
| $\alpha/^\circ$                                | 90                                                               |
| $\beta/^\circ$                                 | 90                                                               |
| $\gamma/^\circ$                                | 120                                                              |
| Volume/Å <sup>3</sup>                          | 4742.9(6)                                                        |
| Z                                              | 9                                                                |
| $\rho_{\text{calc}}/\text{g/cm}^3$             | 1.111                                                            |
| $\mu/\text{mm}^{-1}$                           | 0.071                                                            |
| F(000)                                         | 1710.0                                                           |
| Crystal size/mm <sup>3</sup>                   | 0.15 × 0.06 × 0.04                                               |
| Radiation                                      | MoK $\alpha$ ( $\lambda = 0.71073$ )                             |
| 2 $\Theta$ range for data collection/ $^\circ$ | 4.386 to 52.918                                                  |
| Index ranges                                   | -26 ≤ h ≤ 28, -28 ≤ k ≤ 26, -13 ≤ l ≤ 13                         |
| Reflections collected                          | 13322                                                            |
| Independent reflections                        | 2167 [ $R_{\text{int}} = 0.0801$ , $R_{\text{sigma}} = 0.0566$ ] |
| Data/restraints/parameters                     | 2167/0/119                                                       |
| Goodness-of-fit on F <sup>2</sup>              | 1.020                                                            |
| Final R indexes [ $I \geq 2\sigma(I)$ ]        | $R_1 = 0.0565$ , $wR_2 = 0.1309$                                 |
| Final R indexes [all data]                     | $R_1 = 0.1042$ , $wR_2 = 0.1559$                                 |
| Largest diff. peak/hole / e Å <sup>-3</sup>    | 0.26/-0.24                                                       |

## K. Analytical Date

### 1-methyl-3-phenylisoquinoline (2a)

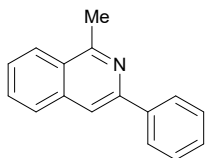

Reaction temperature was 80 °C. Pale yellow solid (104 mg, 95 % yield, known product), mp 46 - 48 °C. <sup>1</sup>H NMR (400 MHz, CDCl<sub>3</sub>): δ 8.17 - 8.19 (m, 2H), 8.13 - 8.16 (m, 1H), 7.95 (s, 1H), 7.86 - 7.89 (m, 1H), 7.67 - 7.71 (m, 1H), 7.57 - 7.61 (m, 1H), 7.52 - 7.56 (m, 2H), 7.42 - 7.46 (m, 1H), 3.08 (s, 3H) ppm; <sup>13</sup>C NMR (100 MHz, CDCl<sub>3</sub>): δ 158.6, 150.0, 139.9, 136.8, 130.0, 128.8, 128.3, 127.7, 127.0, 126.8, 126.6, 125.7, 115.3, 22.7 ppm; IR (KBr): 3058, 2922, 1567, 1387, 1278, 745, 690 cm<sup>-1</sup>. HRMS (ESI) m/z: calcd for C<sub>16</sub>H<sub>14</sub>N [M+H]<sup>+</sup> 220.1121; found 220.1119.

### 1-methyl-3-(p-tolyl)isoquinoline (2b)

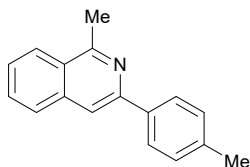

Reaction temperature was 80 °C. Pale yellow oil (114 mg, 98 % yield, known product). <sup>1</sup>H NMR (400 MHz, CDCl<sub>3</sub>): δ 8.13 - 8.15 (m, 1H), 8.05 - 8.09 (m, 2H), 7.92 (s, 1H), 7.85 - 7.87 (m, 1H), 7.66 - 7.70 (m, 1H), 7.55 - 7.59 (m, 1H), 7.32 - 7.35 (m, 2H), 3.06 (s, 3H), 2.46 (s, 3H) ppm; <sup>13</sup>C NMR (100 MHz, CDCl<sub>3</sub>): δ 158.5, 150.1, 138.2, 137.1, 136.8, 130.0, 129.5, 127.6, 126.9, 126.6, 126.5, 125.6, 114.7, 22.7, 21.3 ppm; IR (KBr): 3058, 2921, 1567, 1441, 821, 749 cm<sup>-1</sup>. HRMS (ESI) m/z: calcd for C<sub>17</sub>H<sub>16</sub>N [M+H]<sup>+</sup> 234.1277; found 234.1276.

### 3-(4-(t-butyl)phenyl)-1-methylisoquinoline (2c)

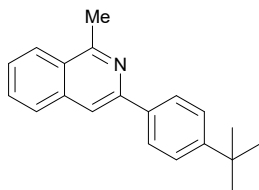

Reaction temperature was 80 °C. Pale yellow oil (125 mg, 91 % yield, known product). <sup>1</sup>H NMR (400 MHz, CDCl<sub>3</sub>): δ 8.13 - 8.16 (m, 1H), 8.06 - 8.10 (m, 2H), 7.92 (s, 1H), 7.86 - 7.89 (m, 1H), 7.66 - 7.70 (m, 1H), 7.53 - 7.60 (m, 3H), 3.06 (s, 3H), 1.41 (s, 9H) ppm; <sup>13</sup>C NMR (100 MHz, CDCl<sub>3</sub>): δ 158.5, 151.4, 150.2, 137.1, 136.8, 129.9, 127.6, 126.7, 126.6, 126.5, 125.69, 125.66, 114.9, 34.7, 31.4, 22.7 ppm; IR (KBr): 3059, 2957, 1566, 1267, 835, 747 cm<sup>-1</sup>. HRMS (ESI) m/z: calcd for C<sub>20</sub>H<sub>22</sub>N [M+H]<sup>+</sup> 276.1747; found 276.1744.

### 3-(4-methoxyphenyl)-1-methylisoquinoline (2d)

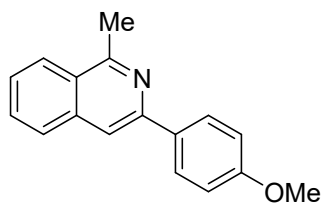

Reaction temperature was 80 °C. Pale yellow solid (116 mg, 93 % yield, known product), mp 58 - 60 °C. <sup>1</sup>H NMR (400 MHz, CDCl<sub>3</sub>): δ 8.10 - 8.14 (m, 3H), 7.83 - 7.86 (m, 2H), 7.65 - 7.69 (m, 1H), 7.53 - 7.58 (m, 1H), 7.04 - 7.07 (m, 2H), 3.90 (s, 3H), 3.05 (s, 3H) ppm; <sup>13</sup>C NMR (100 MHz, CDCl<sub>3</sub>): δ 160.0, 158.4, 149.8, 136.9, 132.6, 130.0, 128.2, 127.5, 126.4, 126.3, 125.7, 114.1, 55.4, 22.7 ppm; IR (KBr): 3060, 2953, 1511, 1246, 831, 750 cm<sup>-1</sup>. HRMS (ESI) m/z: calcd for C<sub>17</sub>H<sub>16</sub>NO [M+H]<sup>+</sup> 250.1226; found 250.1225.

### 3-([1,1'-biphenyl]-4-yl)-1-methylisoquinoline (2e)

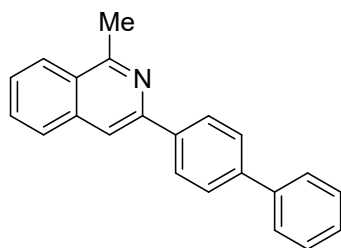

Reaction temperature was 120 °C. Pale yellow solid (126 mg, 85 % yield, known product), mp 145 - 147 °C. <sup>1</sup>H NMR (400 MHz, CDCl<sub>3</sub>): δ 8.24 - 8.27 (m, 2H), 8.15 - 8.18 (m, 1H), 8.00 (s, 1H), 7.89 - 7.91 (s, 1H), 7.75 - 7.78 (m, 2H), 7.69 - 7.73 (m, 3H), 7.58 - 7.63 (m, 1H), 7.48 - 7.52 (m, 2H), 7.38 - 7.42 (m, 1H), 3.09 (s, 3H) ppm; <sup>13</sup>C NMR (100 MHz, CDCl<sub>3</sub>): δ 158.7, 149.6, 141.1, 140.9, 138.8, 136.8, 130.1, 128.8, 127.7, 127.5, 127.38, 127.36, 127.1, 126.8, 126.7, 125.7, 115.1, 22.7 ppm; IR (KBr): 3058, 2921, 1567, 1440, 840, 730 cm<sup>-1</sup>. HRMS (ESI) m/z: calcd for C<sub>22</sub>H<sub>18</sub>N [M+H]<sup>+</sup> 296.1434; found 296.1432.

### 1-methyl-3-(4-(trifluoromethyl)phenyl)isoquinoline (2f)

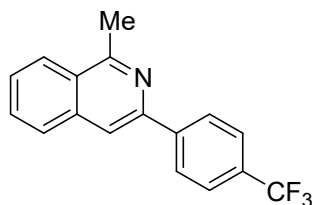

Reaction temperature was 90 °C. Pale yellow oil (89 mg, 62 % yield, known product). <sup>1</sup>H NMR (400 MHz, CDCl<sub>3</sub>): δ 8.26 - 8.28 (m, 2H), 8.14 - 8.17 (m, 1H), 7.97 (s, 1H), 7.87 - 7.90 (m, 1H), 7.75 - 7.78 (m, 2H), 7.70 - 7.74 (m, 1H), 7.61 - 7.65 (m, 1H), 3.06 (s, 3H) ppm; <sup>13</sup>C NMR (100 MHz, CDCl<sub>3</sub>): δ 159.0, 148.3, 143.2 (q, *J* = 1.8 Hz), 136.6, 130.3, 130.1 (q, *J* = 32.1 Hz), 127.8, 127.4, 127.2, 127.0, 125.7, 125.6 (q, *J* = 3.7 Hz), 124.4 (q, *J* = 270.3 Hz), 116.0, 22.6 ppm; <sup>19</sup>F NMR (CDCl<sub>3</sub>): δ -62.4 ppm; IR (KBr): 3065, 2925,

2854, 1619, 1571, 1324, 1121, 842, 747  $\text{cm}^{-1}$ . HRMS (ESI)  $m/z$ : calcd for  $\text{C}_{17}\text{H}_{13}\text{F}_3\text{N}$   $[\text{M}+\text{H}]^+$  288.0995; found 288.0992.

### 3-(4-fluorophenyl)-1-methylisoquinoline (2g)

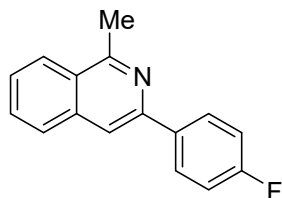

Reaction temperature was 90 °C. Pale yellow solid (106 mg, 89 % yield, known product), mp 75 – 77 °C.  $^1\text{H}$  NMR (400 MHz,  $\text{CDCl}_3$ ):  $\delta$  8.12 - 8.16 (m, 3H), 7.85 - 7.88 (m, 2H), 7.67 - 7.71 (m, 1H), 7.57 - 7.61 (m, 1H), 7.17 - 7.23 (m, 2H), 3.05 (s, 3H) ppm;  $^{13}\text{C}$  NMR (100 MHz,  $\text{CDCl}_3$ ):  $\delta$  163.2 (d,  $J = 245.8$  Hz), 158.7, 149.0, 136.8, 136.0 (d,  $J = 3.0$  Hz), 130.1, 128.7 (m,  $J = 8.1$  Hz), 127.6, 126.9, 126.5, 125.7, 115.6 (d,  $J = 21.4$  Hz), 114.9, 22.7 ppm;  $^{19}\text{F}$  NMR ( $\text{CDCl}_3$ ):  $\delta$  -114.2 ppm; IR (KBr): 3051, 2924, 1510, 1228, 835, 723  $\text{cm}^{-1}$ . HRMS (ESI)  $m/z$ : calcd for  $\text{C}_{16}\text{H}_{13}\text{FN}$   $[\text{M}+\text{H}]^+$  238.1027; found 238.1024.

### 3-(4-chlorophenyl)-1-methylisoquinoline (2h)

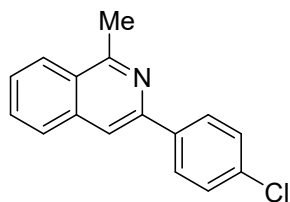

Reaction temperature was 90 °C. Pale yellow solid (94 mg, 74 % yield, known product), mp 50 - 52 °C.  $^1\text{H}$  NMR (400 MHz,  $\text{CDCl}_3$ ):  $\delta$  8.09 - 8.14 (m, 3H), 7.89 (s, 1H), 7.84 - 7.87 (m, 1H), 7.67 - 7.71 (m, 1H), 7.57 - 7.62 (m, 1H), 7.46 - 7.50 (m, 2H), 3.05 (s, 3H) ppm;  $^{13}\text{C}$  NMR (100 MHz,  $\text{CDCl}_3$ ):  $\delta$  158.7, 148.7, 138.3, 136.7, 134.3, 130.2, 128.9, 128.2, 127.6, 127.0, 126.7, 125.7, 115.1, 22.7 ppm; IR (KBr): 3063, 2921, 1568, 1281, 838, 749  $\text{cm}^{-1}$ . HRMS (ESI)  $m/z$ : calcd for  $\text{C}_{16}\text{H}_{13}\text{ClN}$   $[\text{M}+\text{H}]^+$  254.0731; found 254.0728.

### 3-(2-bromophenyl)-1-methylisoquinoline (2i)

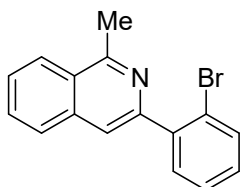

Reaction temperature was 90 °C. Pale yellow oil (112 mg, 75 % yield, new product).  $^1\text{H}$  NMR (400 MHz,  $\text{CDCl}_3$ ):  $\delta$  8.19 - 8.21 (m, 1H), 7.88 - 7.90 (m, 1H), 7.81 (s, 1H), 7.71 - 7.75 (m, 2H), 7.63 - 7.67 (m, 2H), 7.45 (td,  $J = 1.2, 7.6$  Hz, 1H), 7.25 - 7.29 (m, 1H), 3.06 (s, 3H) ppm;  $^{13}\text{C}$  NMR (100 MHz,  $\text{CDCl}_3$ ):  $\delta$  158.4, 150.7, 141.6, 135.9, 133.3, 131.8, 130.2, 129.3, 127.7, 127.5, 127.3, 126.5, 125.7, 122.4, 119.8, 22.5 ppm; IR

(KBr): 3060, 2922, 1566, 1437, 1389, 1261, 754  $\text{cm}^{-1}$ . HRMS (ESI)  $m/z$ : calcd for  $\text{C}_{16}\text{H}_{13}\text{BrN}$   $[\text{M}+\text{H}]^+$  298.0226; found 298.0223.

### 1-methyl-3-(2-(trimethylsilyl)phenyl)isoquinoline (2j)

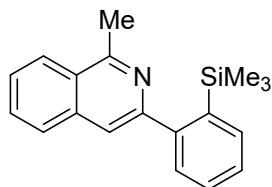

Reaction temperature was 90  $^{\circ}\text{C}$ . Yellow oil (118 mg, 81 % yield, new product).  $^1\text{H}$  NMR (400 MHz,  $\text{CDCl}_3$ ):  $\delta$  8.18 - 8.21 (m, 1H), 7.86 - 7.89 (m, 1H), 7.70 - 7.78 (m, 3H), 7.61 - 7.65 (m, 1H), 7.56 - 7.59 (m, 1H), 7.41 - 7.50 (m, 2H), 3.06 (s, 3H), 0.11 (s, 9H) ppm;  $^{13}\text{C}$  NMR (100 MHz,  $\text{CDCl}_3$ ):  $\delta$  157.6, 154.4, 147.7, 139.3, 136.5, 135.4, 130.1, 129.4, 128.8, 127.5, 127.1, 126.8, 126.3, 125.6, 118.0, 22.0, 0.9 ppm; IR (KBr): 3052, 2952, 1566, 1245, 841, 730  $\text{cm}^{-1}$ . HRMS (ESI)  $m/z$ : calcd for  $\text{C}_{19}\text{H}_{22}\text{NSi}$   $[\text{M}+\text{H}]^+$  292.1516; found 292.1513.

### 2-(1-methylisoquinolin-3-yl)aniline (2k)

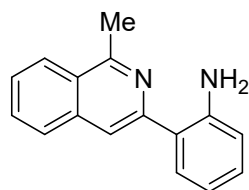

Reaction temperature was 80  $^{\circ}\text{C}$ . Pale yellow oil (55 mg, 47 % yield, new product).  $^1\text{H}$  NMR (400 MHz,  $\text{DMSO-d}_6$ ):  $\delta$  8.20 - 8.23 (m, 1H), 7.98 - 8.01 (m, 2H), 7.74 - 7.78 (m, 1H), 7.62 - 7.66 (m, 1H), 7.55 - 7.58 (m, 1H), 7.08 - 7.12 (m, 1H), 6.79 (d,  $J = 8.0$  Hz, 1H), 6.65 - 6.89 (m, 1H), 6.37 (s, 2H,  $\text{NH}_2$ ), 2.95 (s, 3H) ppm;  $^{13}\text{C}$  NMR (100 MHz,  $\text{DMSO-d}_6$ ):  $\delta$  157.3, 152.1, 147.9, 137.1, 130.8, 129.8, 129.7, 128.0, 127.4, 126.1, 125.5, 122.1, 116.94, 116.87, 1116.7, 22.7 ppm; IR (KBr): 3449, 3310, 3059, 2924, 2857, 1612, 1585, 1461, 1283, 883, 748  $\text{cm}^{-1}$ . HRMS (ESI)  $m/z$ : calcd for  $\text{C}_{16}\text{H}_{15}\text{N}_2$   $[\text{M}+\text{H}]^+$  235.1230; found 235.1227.

### 1-ethyl-3-phenylisoquinoline (2l)

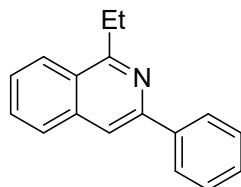

Reaction temperature was 120  $^{\circ}\text{C}$ . Pale yellow oil (73 mg, 63 % yield, known product).  $^1\text{H}$  NMR (400 MHz,  $\text{CDCl}_3$ ):  $\delta$  8.19 - 8.24 (m, 3H), 7.96 (s, 1H), 7.88 - 7.91 (m, 1H), 7.67 - 7.71 (m, 1H), 7.57 - 7.61 (m, 1H), 7.52 - 7.56 (m, 2H), 7.42 - 7.46 (m, 1H), 3.45 (q,  $J = 7.6$  Hz, 2H), 1.57 (t,  $J = 7.6$  Hz, 3H) ppm;  $^{13}\text{C}$  NMR (100 MHz,  $\text{CDCl}_3$ ):  $\delta$  160.9, 147.8, 137.9, 135.2, 128.0, 126.8, 126.4, 125.9, 125.1, 124.8, 124.0, 123.3,



113.1, 26.5, 11.5 ppm; IR (KBr): 3059, 2970, 2928, 2853, 1569, 882, 769, 747, 693  $\text{cm}^{-1}$ . HRMS (ESI)  $m/z$ : calcd for  $\text{C}_{17}\text{H}_{16}\text{N}$   $[\text{M}+\text{H}]^+$  234.1277; found 234.1276.

#### 1-benzyl-6,7-dimethoxy-3-phenylisoquinoline (2m)

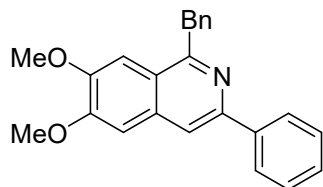

Reaction temperature was 120  $^{\circ}\text{C}$ . Pale yellow solid (50 mg, 28 % yield, new product), mp 119 - 121  $^{\circ}\text{C}$ .  $^1\text{H}$  NMR (400 MHz,  $\text{CDCl}_3$ ):  $\delta$  8.19 - 8.21 (m, 2H), 7.89 (s, 1H), 7.52 - 7.56 (m, 2H), 7.38 - 7.45 (m, 3H), 7.28 - 7.32 (m, 3H), 7.19 - 7.23 (m, 1H), 7.11 (s, 1H), 4.72 (s, 2H), 4.02 (s, 3H), 3.91 (s, 3H) ppm;  $^{13}\text{C}$  NMR (100 MHz,  $\text{CDCl}_3$ ):  $\delta$  157.6, 152.5, 149.7, 149.0, 140.0, 139.8, 134.3, 128.7, 128.5, 128.1, 126.8, 126.2, 122.0, 114.8, 105.7, 104.3, 56.0, 55.9, 42.9 ppm; IR (KBr): 3060, 3025, 2927, 2836, 1505, 1422, 1245, 750, 697  $\text{cm}^{-1}$ . HRMS (ESI)  $m/z$ : calcd for  $\text{C}_{24}\text{H}_{22}\text{NO}_2$   $[\text{M}+\text{H}]^+$  356.1645; found 356.1642.

#### 1-methyl-3-(thiophen-2-yl)isoquinoline (2n)

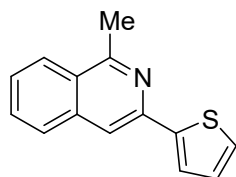

Reaction temperature was 80  $^{\circ}\text{C}$ . Pale yellow oil (80 mg, 71 % yield, known product).  $^1\text{H}$  NMR (400 MHz,  $\text{CDCl}_3$ ):  $\delta$  8.08 - 8.12 (s, 1H), 7.85 (s, 1H), 7.80 - 7.83 (m, 1H), 7.71 (dd,  $J = 1.2, 3.6$  Hz, 1H), 7.64 - 7.69 (m, 1H), 7.53 - 7.57 (m, 1H), 7.40 - 7.41 (m, 1H), 7.17 (dd,  $J = 3.6, 5.2$  Hz, 1H), 3.02 (s, 3H) ppm;  $^{13}\text{C}$  NMR (100 MHz,  $\text{CDCl}_3$ ):  $\delta$  158.8, 145.5, 145.4, 136.6, 130.2, 128.1, 127.4, 126.7, 126.6, 125.8, 123.8, 113.1, 22.5 ppm; IR (KBr): 3067, 2921, 1568, 1447, 1278, 823, 710  $\text{cm}^{-1}$ . HRMS (ESI)  $m/z$ : calcd for  $\text{C}_{14}\text{H}_{12}\text{NS}$   $[\text{M}+\text{H}]^+$  226.0685; found 226.0683.

#### 1-methyl-3-(naphthalen-2-yl)isoquinoline (2o)

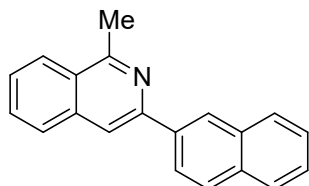

Reaction temperature was 80  $^{\circ}\text{C}$ . Pale yellow solid (122 mg, 90 % yield, known product), mp 131 - 133  $^{\circ}\text{C}$ .  $^1\text{H}$  NMR (400 MHz,  $\text{CDCl}_3$ ):  $\delta$  8.71 - 8.72 (m, 1H), 8.29 - 8.32 (m, 1H), 8.15 - 8.18 (m, 1H), 8.08 (s, 1H), 7.99 - 8.04 (m, 2H), 7.88 - 7.93 (m, 2H), 7.68 - 7.72 (m, 1H), 7.51 - 7.63 (m, 3H), 3.12 (s, 3H) ppm;  $^{13}\text{C}$

NMR (100 MHz, CDCl<sub>3</sub>):  $\delta$  158.7, 149.8, 137.1, 136.8, 133.8, 133.5, 130.1, 128.8, 128.4, 127.7, 126.9, 126.7, 126.22, 126.20, 125.7, 124.8, 115.6, 22.8 ppm; IR (KBr): 3056, 2921, 1568, 1267, 816, 746 cm<sup>-1</sup>. HRMS (ESI) m/z: calcd for C<sub>20</sub>H<sub>16</sub>N [M+H]<sup>+</sup> 270.1277; found 270.1274.

### 3-hexyl-1-methylisoquinoline (2p)

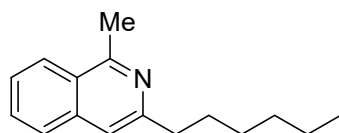

Reaction temperature was 80 °C. Pale yellow oil (88 mg, 77 % yield, known product). <sup>1</sup>H NMR (400 MHz, CDCl<sub>3</sub>):  $\delta$  8.06 - 8.09 (m, 1H), 7.72 - 7.74 (m, 1H), 7.60 - 7.64 (m, 1H), 7.49 - 7.53 (m, 1H), 7.33 (s, 1H), 2.96 (s, 3H), 2.89 - 2.93 (m, 2H), 1.79 - 1.86 (m, 2H), 1.39 - 1.43 (m, 4H), 0.91 - 0.95 (m, 3H) ppm; <sup>13</sup>C NMR (100 MHz, CDCl<sub>3</sub>):  $\delta$  158.0, 154.6, 136.7, 129.7, 126.8, 126.0, 125.8, 125.5, 116.5, 38.2, 31.7, 29.7, 22.6, 22.4, 14.1 ppm; IR (KBr): 3061, 2925, 2857, 1624, 1568, 877, 748 cm<sup>-1</sup>. HRMS (ESI) m/z: calcd for C<sub>15</sub>H<sub>20</sub>N [M+H]<sup>+</sup> 214.1590; found 214.1588.

### 3-cyclopropyl-1-methylisoquinoline (2q)

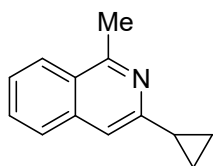

Reaction temperature was 80 °C. Pale yellow solid (74 mg, 81 % yield, new product), mp 49 - 51 °C. <sup>1</sup>H NMR (400 MHz, CDCl<sub>3</sub>):  $\delta$  8.03 - 8.06 (s, 1H), 7.69 - 7.71 (m, 1H), 7.58 - 7.62 (m, 1H), 7.45 - 7.50 (m, 1H), 7.28 (s, 1H), 2.93 (s, 3H), 2.16 - 2.22 (m, 1H), 1.00 - 1.11 (m, 4H) ppm; <sup>13</sup>C NMR (100 MHz, CDCl<sub>3</sub>):  $\delta$  158.1, 154.9, 136.6, 129.7, 126.5, 125.9, 125.59, 125.55, 114.3, 22.4, 17.1, 8.9 ppm; IR (KBr): 3004, 2919, 1622, 1570, 1269, 949, 745 cm<sup>-1</sup>. HRMS (ESI) m/z: calcd for C<sub>13</sub>H<sub>14</sub>N [M+H]<sup>+</sup> 184.1121; found 184.1120.

### 3-cyclopentyl-1-methylisoquinoline (2r)

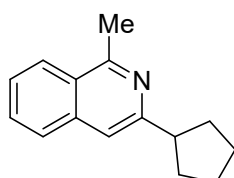

Reaction temperature was 90 °C. Pale yellow oil (90 mg, 85 % yield, known product). <sup>1</sup>H NMR (400 MHz, CDCl<sub>3</sub>):  $\delta$  8.00 - 8.03 (m, 1H), 7.67 - 7.70 (m, 1H), 7.54 - 7.58 (m, 1H), 7.43 - 7.48 (m, 1H), 7.32 (s, 1H), 3.24 - 3.32 (m, 1H), 2.92 (m, 3H), 2.10 - 2.17 (m, 2H), 1.70 - 1.89 (m, 6H) ppm; <sup>13</sup>C NMR (100 MHz,

CDCl<sub>3</sub>):  $\delta$  157.9, 157.8, 136.7, 129.6, 126.9, 126.0, 125.9, 125.5, 114.9, 47.9, 33.6, 25.7, 22.4 ppm; IR (KBr): 3059, 2952, 2866, 1624, 1569, 1446, 878, 748 cm<sup>-1</sup>. HRMS (ESI) m/z: calcd for C<sub>15</sub>H<sub>18</sub>N [M+H]<sup>+</sup> 212.1434; found 212.1432.

#### 5-methyl-7-phenyl-1,6-naphthyridine (2s)

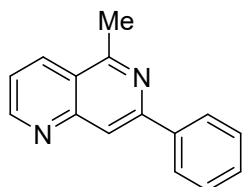

Reaction temperature was 120 °C. Pale yellow solid (60 mg, 54 % yield, new product), mp 102 - 104 °C. <sup>1</sup>H NMR (400 MHz, CDCl<sub>3</sub>):  $\delta$  9.05 - 9.07 (m, 1H), 8.41 - 8.44 (m, 1H), 8.19 - 8.21 (m, 3H), 7.51 - 7.55 (m, 2H), 7.43 - 7.49 (m, 2H), 3.04 (s, 3H) ppm; <sup>13</sup>C NMR (100 MHz, CDCl<sub>3</sub>):  $\delta$  159.4, 154.4, 153.8, 151.7, 139.1, 133.9, 129.0, 128.8, 127.2, 121.7, 121.6, 116.3, 22.1 ppm; IR (KBr): 3057, 2921, 2857, 1603, 1578, 1440, 1332, 773, 697 cm<sup>-1</sup>. HRMS (ESI) m/z: calcd for C<sub>15</sub>H<sub>13</sub>N<sub>2</sub> [M+H]<sup>+</sup> 221.1073; found 221.1072.

#### 7-methyl-5-phenylthieno[2,3-c]pyridine (2t)

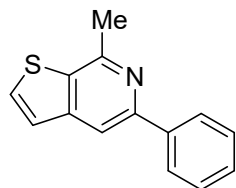

Reaction temperature was 100 °C. Colorless oil (98 mg, 87 % yield, known product). <sup>1</sup>H NMR (400 MHz, CDCl<sub>3</sub>):  $\delta$  8.08 - 8.11 (m, 2H), 7.98 (s, 1H), 7.67 (d, *J* = 5.2 Hz, 1H), 7.50 - 7.55 (m, 2H), 7.41 - 7.45 (m, 2H), 2.91 (s, 3H) ppm; <sup>13</sup>C NMR (100 MHz, CDCl<sub>3</sub>):  $\delta$  152.6, 151.9, 146.0, 140.1, 134.3, 131.3, 128.8, 128.3, 127.1, 124.1, 112.5, 23.8 ppm; IR (KBr): 3061, 2922, 2852, 1578, 1547, 1388, 1261, 765, 694 cm<sup>-1</sup>. HRMS (ESI) m/z: calcd for C<sub>14</sub>H<sub>12</sub>NS [M+H]<sup>+</sup> 226.0685; found 226.0683.

#### 2-phenyl-7,8-dihydrocyclopenta[*ij*]isoquinoline (2u)

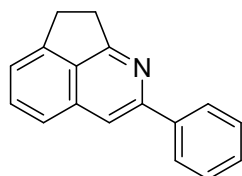

Reaction temperature was 80 °C. Pale yellow oil (90 mg, 78 % yield, new product). <sup>1</sup>H NMR (400 MHz, CDCl<sub>3</sub>):  $\delta$  8.09 - 8.11 (m, 2H), 7.82 (s, 1H), 7.68 - 7.71 (m, 1H), 7.61 - 7.63 (m, 1H), 7.50 - 7.54 (m, 2H), 7.40 - 7.45 (m, 2H), 3.55 - 3.58 (m, 2H), 3.46 - 3.50 (m, 2H) ppm; <sup>13</sup>C NMR (100 MHz, CDCl<sub>3</sub>):  $\delta$  171.4, 154.2, 147.5, 140.8, 134.5, 132.9, 131.9, 128.7, 128.2, 127.4, 121.4, 121.3, 112.5, 32.9, 28.7 ppm; IR (KBr):

3050, 2923, 2856, 1616, 1579, 1436, 865, 779, 693  $\text{cm}^{-1}$ . HRMS (ESI)  $m/z$ : calcd for  $\text{C}_{17}\text{H}_{14}\text{N}$   $[\text{M}+\text{H}]^+$  232.1121; found 232.1119.

### (3-phenylisoquinolin-1-yl)methyl acetate (2v)

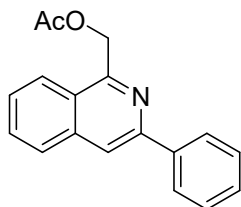

Reaction temperature was 80 °C. Yellow oil (46 mg, 33 % yield, known product).  $^1\text{H}$  NMR (400 MHz,  $\text{CDCl}_3$ ):  $\delta$  8.17 - 8.19 (m, 2H), 8.13 (d,  $J = 8.4$  Hz, 1H), 8.09 (s, 1H), 7.94 (d,  $J = 8.4$  Hz, 1H), 7.71 - 7.75 (m, 1H), 7.61 - 7.65 (m, 1H), 7.51 - 7.55 (m, 2H), 7.42 - 7.46 (m, 1H), 5.82 (s, 2H), 2.22 (s, 3H) ppm;  $^{13}\text{C}$  NMR (100 MHz,  $\text{CDCl}_3$ ):  $\delta$  170.8, 154.3, 150.0, 139.2, 137.4, 130.4, 128.8, 128.6, 127.9, 127.5, 127.0, 125.8, 124.6, 117.1, 66.0, 21.0 ppm; IR (KBr): 3060, 2925, 1739, 1572, 1232, 755, 694  $\text{cm}^{-1}$ . HRMS (ESI)  $m/z$ : calcd for  $\text{C}_{18}\text{H}_{16}\text{NO}_2$   $[\text{M}+\text{H}]^+$  278.1176; found 278.1174.

### 3-phenylisoquinoline (2aa)

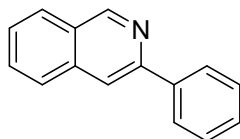

Reaction temperature was 100 °C. Pale yellow solid (92 mg, 90 % yield, known product), mp 104 - 106 °C.  $^1\text{H}$  NMR (400 MHz,  $\text{CDCl}_3$ ):  $\delta$  9.37 (s, 1H), 8.15 - 8.18 (m, 2H), 8.09 (s, 1H), 8.01 (d,  $J = 8.0$  Hz, 1H), 7.89 (d,  $J = 8.0$  Hz, 1H), 7.69 - 7.73 (m, 1H), 7.53 - 7.63 (m, 3H), 7.43 - 7.47 (m, 1H) ppm;  $^{13}\text{C}$  NMR (100 MHz,  $\text{CDCl}_3$ ):  $\delta$  152.4, 151.3, 139.6, 136.7, 130.5, 128.8, 128.5, 127.8, 127.6, 127.1, 127.0, 126.9, 116.5 ppm; IR (KBr): 3035, 2922, 2852, 1452, 883, 761, 685  $\text{cm}^{-1}$ . HRMS (ESI)  $m/z$ : calcd for  $\text{C}_{15}\text{H}_{12}\text{N}$   $[\text{M}+\text{H}]^+$  206.0964; found 206.0963.

### 6-methyl-3-phenylisoquinoline (2ab)

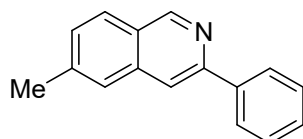

Reaction temperature was 100 °C. Pale yellow solid (104 mg, 95 % yield, known product), mp 176 - 178 °C.  $^1\text{H}$  NMR (400 MHz,  $\text{CDCl}_3$ ):  $\delta$  9.30 (s, 1H), 8.13 - 8.16 (m, 2H), 8.00 (s, 1H), 7.90 (d,  $J = 8.0$  Hz, 1H), 7.65 (s, 1H), 7.52 - 7.56 (m, 2H), 7.42 - 7.46 (m, 2H), 2.58 (s, 3H) ppm;  $^{13}\text{C}$  NMR (100 MHz,  $\text{CDCl}_3$ ):  $\delta$  152.0,

151.3, 140.9, 139.8, 137.0, 129.4, 128.8, 128.4, 127.3, 127.0, 126.3, 125.8, 116.1, 22.1 ppm; IR (KBr): 3052, 3025, 2977, 2921, 2851, 1454, 900, 700  $\text{cm}^{-1}$ . HRMS (ESI)  $m/z$ : calcd for  $\text{C}_{16}\text{H}_{14}\text{N}$   $[\text{M}+\text{H}]^+$  220.1121; found 220.1119.

#### 6-fluoro-3-phenylisoquinoline (2ac)

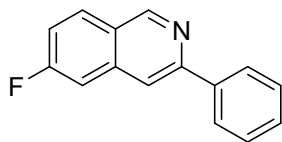

Reaction temperature was 120 °C. Pale yellow solid (106 mg, 95 % yield, known product), mp 134 - 136 °C.  $^1\text{H}$  NMR (400 MHz,  $\text{CDCl}_3$ ):  $\delta$  9.34 (s, 1H), 8.13 - 8.16 (m, 2H), 8.01 - 8.05 (m, 2H), 7.44 - 7.57 (m, 4H), 7.35 - 7.40 (m, 1H) ppm;  $^{13}\text{C}$  NMR (100 MHz,  $\text{CDCl}_3$ ):  $\delta$  163.5 (d,  $J = 51.1$  Hz), 152.1, 152.0, 139.1, 138.2 (d,  $J = 10.5$  Hz), 130.6 (d,  $J = 9.5$  Hz), 128.9, 127.1, 124.9, 117.7 (d,  $J = 26.0$  Hz), 116.2, 116.1, 110.3 (d,  $J = 20.9$  Hz) ppm;  $^{19}\text{F}$  NMR ( $\text{CDCl}_3$ ):  $\delta$  -106.8 ppm; IR (KBr): 2921, 2854, 1215, 892, 755, 685  $\text{cm}^{-1}$ . HRMS (ESI)  $m/z$ : calcd for  $\text{C}_{15}\text{H}_{11}\text{FN}$   $[\text{M}+\text{H}]^+$  224.0870; found 224.0869.

#### 7-methoxy-3-phenylisoquinoline (2ad)

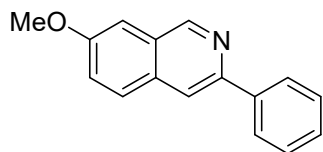

Reaction temperature was 100 °C. Pale yellow solid (91 mg, 77 % yield, known product), mp 162 - 164 °C.  $^1\text{H}$  NMR (400 MHz,  $\text{CDCl}_3$ ):  $\delta$  9.26 (s, 1H), 8.11 - 8.13 (m, 2H), 8.03 (s, 1H), 7.80 (dd,  $J = 2.0, 8.8$  Hz, 1H), 7.53 (t,  $J = 7.2$  Hz, 2H), 7.36 - 7.44 (m, 2H), 7.26 - 7.28 (m, 1H), 3.99 (s, 3H) ppm;  $^{13}\text{C}$  NMR (100 MHz,  $\text{CDCl}_3$ ):  $\delta$  158.4, 150.9, 149.7, 139.7, 132.3, 128.9, 128.8, 128.5, 128.2, 126.8, 123.8, 116.5, 104.7, 55.5 ppm; IR (KBr): 2924, 1270, 754, 695  $\text{cm}^{-1}$ . HRMS (ESI)  $m/z$ : calcd for  $\text{C}_{16}\text{H}_{14}\text{NO}$   $[\text{M}+\text{H}]^+$  236.1070; found 236.1069.

#### 7-chloro-3-phenylisoquinoline (2ae)

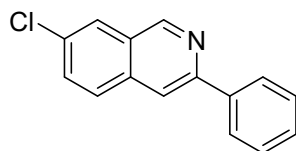

Reaction temperature was 120 °C. Pale yellow solid (115 mg, 96 % yield, known product), mp 157 - 159 °C.  $^1\text{H}$  NMR (400 MHz,  $\text{CDCl}_3$ ):  $\delta$  9.29 (s, 1H), 8.12 - 8.15 (m, 2H), 8.06 (s, 1H), 7.99 (d,  $J = 2.0$  Hz, 1H), 7.84 (d,  $J = 8.4$  Hz, 1H), 7.65 (dd,  $J = 2.4, 8.8$  Hz, 1H), 7.52 - 7.56 (m, 2H), 7.43 - 7.48 (m, 1H) ppm;  $^{13}\text{C}$  NMR (100 MHz,  $\text{CDCl}_3$ ):  $\delta$  151.7, 151.4, 139.2, 134.9, 132.6, 131.6, 128.9, 128.8, 128.6, 128.1, 127.0, 126.4,

116.2 ppm; IR (KBr): 3060, 2999, 1271, 880, 756, 688  $\text{cm}^{-1}$ . HRMS (ESI)  $m/z$ : calcd for  $\text{C}_{15}\text{H}_{11}\text{ClN}$   $[\text{M}+\text{H}]^+$  240.0575; found 240.0573.

### 3-phenyl-7-(trifluoromethyl)isoquinoline (2af)

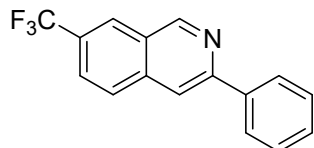

Reaction temperature was 120  $^{\circ}\text{C}$ . Pale yellow solid (116 mg, 85 % yield, known product), mp 168 - 170  $^{\circ}\text{C}$ .  $^1\text{H}$  NMR (400 MHz,  $\text{CDCl}_3$ ):  $\delta$  9.45 (s, 1H), 8.32 (s, 1H), 8.14 - 8.18 (m, 3H), 8.00 - 8.02 (m, 1H), 7.86 - 7.89 (m, 1H), 7.53 - 7.58 (m, 2H), 7.46 - 7.50 (m, 1H) ppm;  $^{13}\text{C}$  NMR (100 MHz,  $\text{CDCl}_3$ ):  $\delta$  153.4, 153.1, 138.9, 138.0, 129.2, 128.9, 128.8 (d,  $J = 32.5$  Hz), 128.2, 127.2, 126.4, 126.1 (q,  $J = 3.2$  Hz), 125.5 (q,  $J = 4.5$  Hz), 123.9 (q,  $J = 270.4$  Hz), 116.1 ppm;  $^{19}\text{F}$  NMR ( $\text{CDCl}_3$ ):  $\delta$  -62.6 ppm; IR (KBr): 2923, 2850, 1109, 886, 761, 688  $\text{cm}^{-1}$ . HRMS (ESI)  $m/z$ : calcd for  $\text{C}_{16}\text{H}_{11}\text{F}_3\text{N}$   $[\text{M}+\text{H}]^+$  274.0838; found 274.0836.

### 6,7-dimethoxy-3-phenylisoquinoline (2ag)

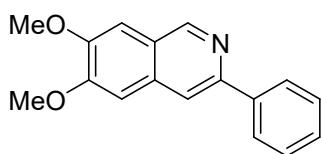

Reaction temperature was 100  $^{\circ}\text{C}$ . Pale yellow solid (103 mg, 78 % yield, known product), mp 128 - 130  $^{\circ}\text{C}$ .  $^1\text{H}$  NMR (400 MHz,  $\text{CDCl}_3$ ):  $\delta$  9.14 (s, 1H), 8.09 - 8.11 (m, 2H), 7.95 (s, 1H), 7.50 - 7.53 (m, 2H), 7.40 - 7.44 (m, 1H), 7.23 (s, 1H), 7.13 (s, 1H), 4.06 (s, 6H) ppm;  $^{13}\text{C}$  NMR (100 MHz,  $\text{CDCl}_3$ ):  $\delta$  153.2, 150.3, 150.27, 149.8, 139.9, 133.4, 128.8, 128.2, 126.8, 123.8, 115.6, 105.3, 105.0, 56.1, 56.09 ppm; IR (KBr): 3060, 3003, 2962, 2837, 1503, 1241, 1151, 751, 693  $\text{cm}^{-1}$ . HRMS (ESI)  $m/z$ : calcd for  $\text{C}_{17}\text{H}_{16}\text{NO}_2$   $[\text{M}+\text{H}]^+$  266.1176; found 266.1174.

### 3-phenylisoquinolin-7-ol (2ah)

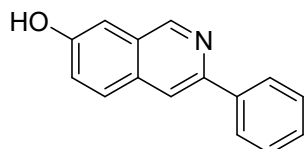

Reaction temperature was 100  $^{\circ}\text{C}$ . Pale yellow solid (81 mg, 73 % yield, new product), mp 258 - 260  $^{\circ}\text{C}$ .  $^1\text{H}$  NMR (400 MHz,  $\text{DMSO-d}_6$ ):  $\delta$  11.36 (br, 1H, OH), 9.99 (s, 1H), 7.75 - 7.77 (m, 2H), 7.59 (d,  $J = 8.8$  Hz, 1H), 7.55 (d,  $J = 2.8$  Hz, 1H), 7.40 - 7.50 (m, 3H), 7.21 (dd,  $J = 2.8, 8.8$  Hz, 1H), 6.85 (s, 1H) ppm;  $^{13}\text{C}$  NMR (100 MHz,  $\text{DMSO-d}_6$ ):  $\delta$  162.9, 156.8, 137.1, 134.6, 131.0, 129.2, 129.1, 129.0, 126.83, 126.77, 122.9, 110.6,

103.8 ppm; IR (KBr): 3453, 2924, 2852, 1631, 1269, 751  $\text{cm}^{-1}$ . HRMS (ESI)  $m/z$ : calcd for  $\text{C}_{15}\text{H}_{12}\text{NO}$   $[\text{M}+\text{H}]^+$  222.0913; found 222.0910.

### 3-phenylisoquinoline *N*-oxide (4a)

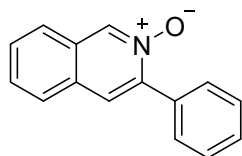

Reaction temperature was 70  $^{\circ}\text{C}$ . White solid (94 mg, 85 % yield, known product), mp 157 - 159  $^{\circ}\text{C}$ .  $^1\text{H}$  NMR (400 MHz,  $\text{DMSO-d}_6$ ):  $\delta$  9.10 (s, 1H), 8.14 (s, 1H), 7.96 - 7.98 (m, 1H), 7.90 - 7.92 (m, 1H), 7.80 - 7.82 (m, 2H), 7.60 - 7.68 (m, 2H), 7.48 - 7.54 (m, 3H) ppm;  $^{13}\text{C}$  NMR (100 MHz,  $\text{DMSO-d}_6$ ):  $\delta$  146.4, 136.6, 133.5, 130.2, 129.6, 129.5, 129.4, 128.9, 128.8, 128.3, 127.3, 125.4, 124.8 ppm; IR (KBr): 3056, 2924, 2850, 1750, 1374, 1233, 752, 694  $\text{cm}^{-1}$ . HRMS (ESI)  $m/z$ : calcd for  $\text{C}_{15}\text{H}_{12}\text{NO}$   $[\text{M}+\text{H}]^+$  222.0913; found 222.0911.

### 3-(*p*-tolyl)isoquinoline *N*-oxide (4b)

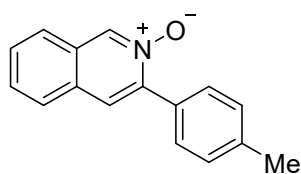

Reaction temperature was 90  $^{\circ}\text{C}$ . White solid (100 mg, 85 % yield, known product), mp 167 - 169  $^{\circ}\text{C}$ .  $^1\text{H}$  NMR (400 MHz,  $\text{DMSO-d}_6$ ):  $\delta$  9.06 (s, 1H), 8.09 (s, 1H), 7.87 - 7.96 (m, 2H), 7.58 - 7.73 (m, 4H), 7.29 - 7.31 (m, 2H), 2.38 (s, 3H) ppm;  $^{13}\text{C}$  NMR (100 MHz,  $\text{DMSO-d}_6$ ):  $\delta$  146.5, 139.1, 136.5, 130.6, 130.0, 129.4, 129.3, 128.9, 128.8, 128.7, 127.2, 125.0, 124.7, 21.4 ppm; IR (KBr): 3058, 3022, 2922, 2854, 1630, 1436, 1312, 1178, 748  $\text{cm}^{-1}$ . HRMS (ESI)  $m/z$ : calcd for  $\text{C}_{16}\text{H}_{14}\text{NO}$   $[\text{M}+\text{H}]^+$  236.1070; found 236.1069.

### 3-(4-(*tert*-butyl)phenyl)isoquinoline *N*-oxide (4c)

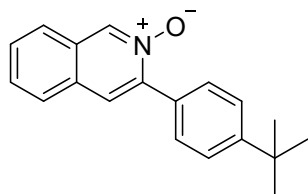

Reaction temperature was 120  $^{\circ}\text{C}$ . White solid (111 mg, 80 % yield, known product), mp 203 - 205  $^{\circ}\text{C}$ .  $^1\text{H}$  NMR (400 MHz,  $\text{DMSO-d}_6$ ):  $\delta$  9.07 (s, 1H), 8.10 (s, 1H), 7.94 (d,  $J=7.2$  Hz, 1H), 7.89 (d,  $J=7.6$  Hz, 1H), 7.75 (d,  $J=8.0$  Hz, 2H), 7.58 - 7.66 (m, 2H), 7.51 (d,  $J=8.0$  Hz, 2H), 1.33 (s, 9H) ppm;  $^{13}\text{C}$  NMR (100 MHz,  $\text{DMSO-d}_6$ ):  $\delta$  152.1, 146.4, 136.5, 130.7, 129.9, 129.4, 129.3, 128.9, 128.8, 127.2, 125.1, 125.0, 124.8, 35.0,

31.5 ppm; IR (KBr): 3055, 2959, 2866, 1312, 1178, 752  $\text{cm}^{-1}$ . HRMS (ESI)  $m/z$ : calcd for  $\text{C}_{19}\text{H}_{20}\text{NO}$   $[\text{M}+\text{H}]^+$  278.1539; found 278.1538.

### 3-(4-methoxyphenyl)isoquinoline *N*-oxide (4d)

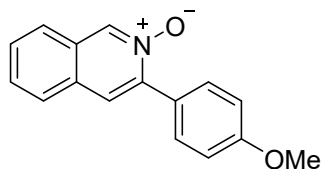

Reaction temperature was 90  $^{\circ}\text{C}$ . White solid (107 mg, 85 % yield, known product), mp 194 - 196  $^{\circ}\text{C}$ .  $^1\text{H}$  NMR (400 MHz,  $\text{DMSO}-d_6$ ):  $\delta$  9.05 (s, 1H), 8.08 (s, 1H), 7.86 - 7.95 (m, 2H), 7.78 - 7.82 (m, 2H), 7.56 - 7.64 (m, 2H), 7.03 - 7.06 (m, 2H), 3.83 (s, 3H) ppm;  $^{13}\text{C}$  NMR (100 MHz,  $\text{DMSO}-d_6$ ):  $\delta$  160.3, 146.2, 136.6, 131.6, 129.2, 129.1, 128.9, 128.8, 127.1, 125.6, 124.7, 124.6, 113.7, 55.7 ppm; IR (KBr): 3061, 3016, 1606, 1310, 1248, 1178, 751  $\text{cm}^{-1}$ . HRMS (ESI)  $m/z$ : calcd for  $\text{C}_{16}\text{H}_{14}\text{NO}_2$   $[\text{M}+\text{H}]^+$  252.1019; found 252.1017.

### 3-([1,1'-biphenyl]-4-yl)isoquinoline *N*-oxide (4e)

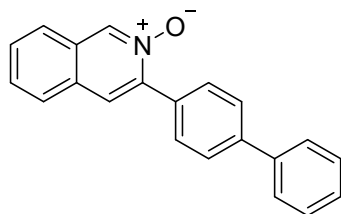

Reaction temperature was 120  $^{\circ}\text{C}$ . White solid (113 mg, 76 % yield, known product), mp 245 - 247  $^{\circ}\text{C}$ .  $^1\text{H}$  NMR (400 MHz,  $\text{CDCl}_3$ ):  $\delta$  8.95 (s, 1H), 7.84 - 7.95 (m, 4H), 7.74 - 7.76 (m, 3H), 7.59 - 7.69 (m, 4H), 7.48 - 7.52 (m, 2H), 7.38 - 7.43 (m, 1H) ppm;  $^{13}\text{C}$  NMR (100 MHz,  $\text{CDCl}_3$ ):  $\delta$  146.8, 142.3, 140.5, 137.5, 131.6, 130.2, 129.6, 129.2, 128.9, 128.8, 128.6, 127.7, 127.2, 127.0, 126.5, 124.7, 124.5 ppm; IR (KBr): 1315, 1179, 752  $\text{cm}^{-1}$ . HRMS (ESI)  $m/z$ : calcd for  $\text{C}_{21}\text{H}_{16}\text{NO}$   $[\text{M}+\text{H}]^+$  298.1226; found 298.1224.

### 3-(4-(trifluoromethyl)phenyl)isoquinoline *N*-oxide (4f)

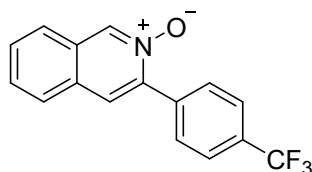

Reaction temperature was 90  $^{\circ}\text{C}$ . White solid (101 mg, 70 % yield, known product), mp 210 - 212  $^{\circ}\text{C}$ .  $^1\text{H}$  NMR (400 MHz,  $\text{DMSO}-d_6$ ):  $\delta$  9.12 (s, 1H), 8.21 (s, 1H), 8.03 - 8.05 (m, 2H), 7.90 - 7.99 (m, 2H), 7.84 - 7.87 (m, 2H), 7.61 - 7.70 (m, 2H) ppm;  $^{13}\text{C}$  NMR (100 MHz,  $\text{DMSO}-d_6$ ):  $\delta$  144.9, 137.5, 136.7, 131.1, 130.0, 129.7, 129.6, 129.1, 128.7, 127.4, 125.9, 125.2 (q,  $J = 3.7$  Hz), 124.9, 124.6 (d,  $J = 270.6$  Hz) ppm;  $^{19}\text{F}$



NMR ( DMSO-d<sub>6</sub>) :  $\delta$  -61.2 ppm; IR (KBr): 3030, 1632, 1405, 1177, 1116, 845, 750 cm<sup>-1</sup>. HRMS (ESI) m/z: calcd for C<sub>16</sub>H<sub>11</sub>F<sub>3</sub>NO [M+H]<sup>+</sup> 290.0787; found 290.0784.

### 3-(4-fluorophenyl)isoquinoline N-oxide (4g)

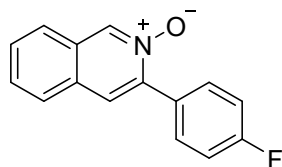

Reaction temperature was 90 °C. White solid (96 mg, 80 % yield, known product), mp 190 - 192 °C. <sup>1</sup>H NMR (400 MHz, DMSO-d<sub>6</sub>) :  $\delta$  9.09 (s, 1H), 8.14 (s, 1H), 7.94 - 7.96 (m, 1H), 7.86 - 7.91 (m, 3H), 7.59 - 7.67 (m, 2H), 7.30 - 7.36 (m, 2H) ppm; <sup>13</sup>C NMR (100 MHz, DMSO-d<sub>6</sub>) :  $\delta$  162.9 (d, *J* = 245.0 Hz), 145.4, 136.6, 132.5 (d, *J* = 8.3 Hz), 129.8 (d, *J* = 3.2 Hz), 129.6, 129.4, 129.0, 128.7, 127.3, 125.3, 124.8, 115.3 (d, *J* = 21.4 Hz) ppm; <sup>9</sup>F NMR ( DMSO-d<sub>6</sub>) :  $\delta$  -112.0 ppm; IR (KBr): 3028, 1603, 1514, 1314, 1179, 833, 749 cm<sup>-1</sup>. HRMS (ESI) m/z: calcd for C<sub>15</sub>H<sub>11</sub>FNO [M+H]<sup>+</sup> 240.0819; found 240.0817.

### 3-(4-chlorophenyl)isoquinoline N-oxide (4h)

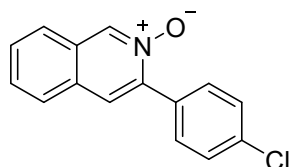

Reaction temperature was 90 °C. White solid (106 mg, 83 % yield, known product), mp 198 - 200 °C. <sup>1</sup>H NMR (400 MHz, DMSO- d<sub>6</sub>):  $\delta$  9.10 (s, 1H), 8.17 (s, 1H), 7.89 - 7.98 (m, 2H), 7.84 - 7.91 (m, 2H), 7.60 - 7.69 (m, 2H), 7.55 - 7.58 (m, 2H) ppm; <sup>13</sup>C NMR (100 MHz, DMSO- d<sub>6</sub>):  $\delta$  145.2, 136.6, 134.3, 132.3, 132.0, 129.7, 129.5, 129.0, 128.7, 128.4, 127.3, 125.5, 124.9 ppm; IR (KBr): 3020, 1632, 1601, 1314, 1177, 746 cm<sup>-1</sup>. HRMS (ESI) m/z: calcd for C<sub>15</sub>H<sub>11</sub>ClNO [M+H]<sup>+</sup> 256.0524; found 256.0523.

### 3-(2-bromophenyl)isoquinoline N-oxide (4i)

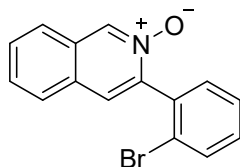

Reaction temperature was 90 °C. White solid (92 mg, 61 % yield, new product), mp 178 - 180 °C. <sup>1</sup>H NMR (400 MHz, DMSO- d<sub>6</sub>):  $\delta$  9.09 (s, 1H), 8.06 (s, 1H), 7.95 (dd, *J* = 8, 16.8 Hz, 2H), 7.77 (d, *J* = 8 Hz, 1H), 7.62 - 7.72 (m, 2H), 7.51 - 7.55 (m, 2H), 7.42 - 7.47 (m, 1H) ppm; <sup>13</sup>C NMR (100 MHz, DMSO- d<sub>6</sub>):  $\delta$  146.6, 136.0, 135.5, 132.6, 132.5, 131.3, 129.9, 129.8, 129.0, 128.2, 128.0, 127.3, 125.8, 125.0, 124.3 ppm; IR

(KBr): 1635, 1432, 1316, 1180, 748  $\text{cm}^{-1}$ . HRMS (ESI)  $m/z$ : calcd for  $\text{C}_{15}\text{H}_{11}\text{BrNO}$   $[\text{M}+\text{H}]^+$  300.0019; found 300.0017.

### 3-(naphthalen-2-yl)isoquinoline *N*-oxide (4j)

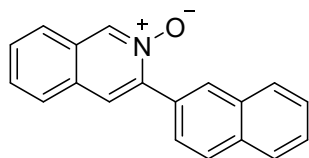

Reaction temperature was 90 °C. White solid (117 mg, 86 % yield, known product), mp 218 - 220 °C.  $^1\text{H}$  NMR (400 MHz, DMSO-  $d_6$ ):  $\delta$  9.14 (s, 1H), 8.34 (s, 1H), 8.27 (s, 1H), 7.92 - 8.04 (m, 6H), 7.56 - 7.69 (m, 4H) ppm;  $^{13}\text{C}$  NMR (100 MHz, DMSO-  $d_6$ ):  $\delta$  146.4, 136.6, 133.4, 133.0, 131.4, 129.6, 129.54, 129.5, 129.0, 128.9, 128.8, 128.0, 127.7, 127.4, 127.3, 127.2, 126.8, 125.7, 124.9 ppm; IR (KBr): 1632, 1313, 1179, 1126, 748  $\text{cm}^{-1}$ . HRMS (ESI)  $m/z$ : calcd for  $\text{C}_{19}\text{H}_{14}\text{NO}$   $[\text{M}+\text{H}]^+$  272.1070; found 272.1067.

### 3-(thiophen-2-yl)isoquinoline *N*-oxide (4k)

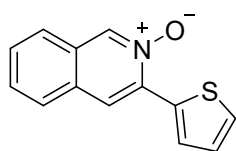

Reaction temperature was 90 °C. White solid (101 mg, 89 % yield, known product), mp 178 - 180 °C.  $^1\text{H}$  NMR (400 MHz, DMSO-  $d_6$ ):  $\delta$  9.19 (s, 1H), 8.84 (d,  $J = 6.0$  Hz, 1H), 8.18 - 8.20 (m, 1H), 7.89 - 7.98 (m, 2H), 7.74 (d,  $J = 5.2$  Hz, 1H), 7.59 - 7.64 (m, 2H) ppm;  $^{13}\text{C}$  NMR (100 MHz, DMSO-  $d_6$ ):  $\delta$  140.2, 136.2, 131.7, 131.5, 129.3, 129.1, 129.0, 128.0, 127.9, 127.1, 126.6, 125.1, 120.1 ppm; IR (KBr): 3065, 1595, 1313, 1180, 749, 699  $\text{cm}^{-1}$ . HRMS (ESI)  $m/z$ : calcd for  $\text{C}_{13}\text{H}_{10}\text{NOS}$   $[\text{M}+\text{H}]^+$  228.0475; found 228.0478.

### isoquinoline *N*-oxide (4l)

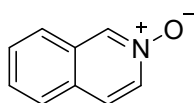

Reaction temperature was 70 °C. Pale green solid (71 mg, 98 % yield, known product), mp 56 - 58 °C.  $^1\text{H}$  NMR (400 MHz, DMSO-  $d_6$ ):  $\delta$  8.96 (s, 1H), 8.15 - 8.17 (m, 1H), 7.88 - 7.97 (m, 3H), 7.59 - 7.69 (m, 2H) ppm;  $^{13}\text{C}$  NMR (100 MHz, DMSO-  $d_6$ ):  $\delta$  137.5, 135.5, 130.0, 129.8, 128.8, 128.3, 127.2, 125.2, 125.0 ppm; IR (KBr): 3062, 1326, 1177, 1124, 736  $\text{cm}^{-1}$ . HRMS (ESI)  $m/z$ : calcd for  $\text{C}_9\text{H}_8\text{NO}$   $[\text{M}+\text{H}]^+$  146.0600; found 146.0599.

### 3-pentylisoquinoline *N*-oxide (4m)

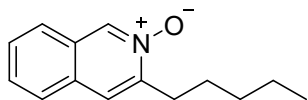

Reaction temperature was 90 °C. Pale yellow oil (97 mg, 90 % yield, new product). <sup>1</sup>H NMR (400 MHz, DMSO- d<sub>6</sub>): δ 8.99 (s, 1H), 7.83 - 7.89 (m, 3H), 7.54 - 7.60 (m, 2H), 2.87 (t, *J* = 7.6 Hz, 2H), 1.66 - 1.73 (m, 2H), 1.31 - 1.36 (m, 4H), 0.85 - 0.89 (m, 3H) ppm; <sup>13</sup>C NMR (100 MHz, DMSO- d<sub>6</sub>): δ 149.1, 135.9, 128.6, 128.5, 126.5, 124.8, 122.7, 31.5, 30.1, 26.5, 22.4, 14.3 ppm; IR (KBr): 2954, 2923, 2860, 1633, 1317, 1178, 1111, 748 cm<sup>-1</sup>. HRMS (ESI) *m/z*: calcd for C<sub>14</sub>H<sub>18</sub>NO [M+H]<sup>+</sup> 216.1383; found 216.1382.

### 3-cyclopropylisoquinoline *N*-oxide (4n)

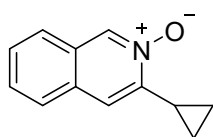

Reaction temperature was 90 °C. White solid (81 mg, 87 % yield, known product), mp 95 - 97 °C. <sup>1</sup>H NMR (400 MHz, DMSO- d<sub>6</sub>): δ 9.00 (s, 1H), 7.80 - 7.83 (m, 2H), 7.64 (s, 1H), 7.51 - 7.57 (s, 2H), 2.59 - 2.66 (m, 1H), 1.06 - 1.11 (m, 2H), 0.83 - 0.87 (m, 2H) ppm; <sup>13</sup>C NMR (100 MHz, DMSO- d<sub>6</sub>): δ 150.6, 135.7, 128.63, 128.60, 128.5, 128.1, 126.5, 124.7, 118.9, 10.7, 8.5 ppm; IR (KBr): 3056, 3008, 1318, 1174, 751 cm<sup>-1</sup>. HRMS (ESI) *m/z*: calcd for C<sub>12</sub>H<sub>12</sub>NO [M+H]<sup>+</sup> 186.0913; found 186.0912.

### 3-cyclopentylisoquinoline *N*-oxide (4o)

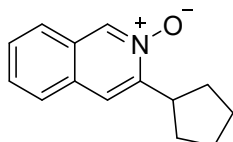

Reaction temperature was 90 °C. Pale yellow solid (79 mg, 74 % yield, new product), mp 80 - 82 °C. <sup>1</sup>H NMR (400 MHz, DMSO- d<sub>6</sub>): δ 9.00 (s, 1H), 7.91 - 7.94 (m, 2H), 7.83 - 7.85 (m, 1H), 7.55 - 7.61 (m, 2H), 3.65 - 3.73 (m, 1H), 2.11 - 2.18 (m, 2H), 1.60 - 1.82 (m, 6H) ppm; <sup>13</sup>C NMR (100 MHz, DMSO- d<sub>6</sub>): δ 152.7, 136.0, 128.6, 128.5, 128.3, 126.7, 124.6, 120.4, 39.2, 31.3, 25.2 ppm; IR (KBr): 3056, 2951, 2867, 1319, 1176, 1133, 752 cm<sup>-1</sup>. HRMS (ESI) *m/z*: calcd for C<sub>14</sub>H<sub>16</sub>NO [M+H]<sup>+</sup> 214.1226; found 214.1225.

### 6-methyl-3-phenylisoquinoline *N*-oxide (4p)

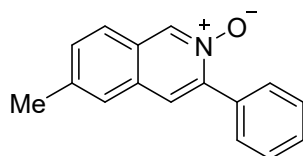

Reaction temperature was 90 °C. White solid (92 mg, 78 % yield, known product), mp 164 -166 °C. <sup>1</sup>H NMR (400 MHz, DMSO- d<sub>6</sub>): δ 9.04 (s, 1H), 8.03 (s, 1H), 7.75 - 7.83 (m, 4H), 7.48 (m, 4H), 2.48 (s, 3H) ppm; <sup>13</sup>C

NMR (100 MHz, DMSO- d<sub>6</sub>):  $\delta$  146.4, 138.9, 136.4, 133.6, 131.7, 130.2, 129.4, 129.0, 128.3, 127.7, 126.1, 124.8, 124.7, 21.9 ppm; IR (KBr): 2925, 1753, 1273, 752 cm<sup>-1</sup>. HRMS (ESI) m/z: calcd for C<sub>16</sub>H<sub>14</sub>NO [M+H]<sup>+</sup> 236.1070; found 236.1068.

#### 6-methoxy-3-phenylisoquinoline N-oxide (4q)

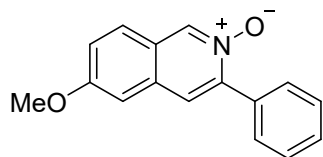

Reaction temperature was 90 °C. White solid (96 mg, 76 % yield, known product), mp 198 -200 °C. <sup>1</sup>H NMR (400 MHz, DMSO- d<sub>6</sub>):  $\delta$  8.91 (s, 1H), 8.06 (s, 1H), 7.87 - 7.90 (m, 1H), 7.79 - 7.80 (m, 2H), 7.44 - 7.51 (m, 3H), 7.21 - 7.32 (m, 2H), 3.90 (s, 3H) ppm; <sup>13</sup>C NMR (100 MHz, DMSO- d<sub>6</sub>):  $\delta$  159.8, 144.4, 135.8, 133.7, 130.9, 130.1, 129.2, 128.9, 128.3, 125.0, 124.5, 121.6, 103.0, 56.0 ppm; IR (KBr): 2927, 2854, 1754, 1271, 753, 697 cm<sup>-1</sup>. HRMS (ESI) m/z: calcd for C<sub>16</sub>H<sub>14</sub>NO<sub>2</sub> [M+H]<sup>+</sup> 252.1019; found 252.1017.

#### 6-fluoro-3-phenylisoquinoline N-oxide (4r)

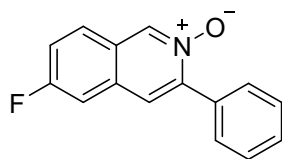

Reaction temperature was 120 °C. White solid (105 mg, 88 % yield, known product), mp 214 - 216 °C. <sup>1</sup>H NMR (400 MHz, DMSO- d<sub>6</sub>):  $\delta$  9.12 (s, 1H), 8.11 (s, 1H), 7.99 (dd, *J* = 5.6, 9.2 Hz, 1H), 7.75 - 7.82 (m, 3H), 7.56 - 7.61 (m, 1H), 7.48 - 7.52 (m, 3H) ppm; <sup>13</sup>C NMR (100 MHz, DMSO- d<sub>6</sub>):  $\delta$  161.7 (d, *J* = 246.6 Hz), 147.2, 136.6, 133.3, 130.1, 129.8 (d, *J* = 10.3 Hz), 129.7, 128.4, 128.2 (d, *J* = 9.3 Hz), 126.8, 124.8 (d, *J* = 5.5 Hz), 119.9 (d, *J* = 25.9 Hz), 111.0 (d, *J* = 22.1 Hz) ppm; <sup>19</sup>F NMR (DMSO-d<sub>6</sub>):  $\delta$  -110.2 ppm; IR (KBr): 2926, 2853, 1270, 1212, 754 cm<sup>-1</sup>. HRMS (ESI) m/z: calcd for C<sub>15</sub>H<sub>11</sub>FNO [M+H]<sup>+</sup> 240.0819; found 240.0817.

#### 7-chloro-3-phenylisoquinoline N-oxide (4s)

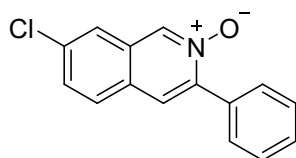

Reaction temperature was 120 °C. White solid (106 mg, 83 % yield, known product), mp 194 - 196 °C. <sup>1</sup>H NMR (400 MHz, DMSO- d<sub>6</sub>):  $\delta$  9.05 (s, 1H), 8.17 (s, 1H), 7.98 - 8.02 (m, 2H), 7.78 - 7.80 (m, 2H), 7.59 - 7.63 (m, 1H), 7.48 - 7.52 (m, 3H) ppm; <sup>13</sup>C NMR (100 MHz, DMSO- d<sub>6</sub>):  $\delta$  146.9, 135.9, 134.0, 133.2,

130.3, 130.1, 129.7, 129.6, 129.2, 128.4, 127.1, 125.2, 123.4 ppm; IR (KBr): 1274, 751  $\text{cm}^{-1}$ . HRMS (ESI)  $m/z$ : calcd for  $\text{C}_{15}\text{H}_{11}\text{ClNO}$   $[\text{M}+\text{H}]^+$  256.0524; found 256.0522.

#### 3-phenyl-7-(trifluoromethyl)isoquinoline *N*-oxide (4t)

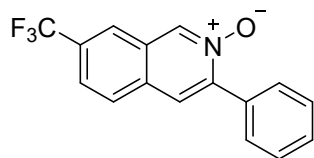

Reaction temperature was 120  $^{\circ}\text{C}$ . White solid (132 mg, 91 % yield, known product), mp 213 - 215  $^{\circ}\text{C}$ .  $^1\text{H}$  NMR (400 MHz, DMSO-  $d_6$ ):  $\delta$  9.25 (s, 1H), 8.39 (s, 1H), 8.28 (s, 1H), 8.17 (d,  $J = 8.4$  Hz, 1H), 7.80 - 7.86 (m, 3H), 7.50 - 7.54 (m, 3H) ppm;  $^{13}\text{C}$  NMR (100 MHz, DMSO-  $d_6$ ):  $\delta$  148.6, 137.4, 133.0, 130.2, 130.0, 129.9, 129.3 (d,  $J = 31.7$  Hz), 129.1, 128.7, 128.4, 125.3, 124.3 (d,  $J = 270.9$  Hz), 123.8 (q,  $J = 3.2$  Hz), 122.9 (q,  $J = 4.7$  Hz) ppm;  $^9\text{F}$  NMR (DMSO- $d_6$ ):  $\delta$  -61.5 ppm; IR (KBr): 3041, 1192, 1128, 749, 695  $\text{cm}^{-1}$ . HRMS (ESI)  $m/z$ : calcd for  $\text{C}_{16}\text{H}_{11}\text{F}_3\text{NO}$   $[\text{M}+\text{H}]^+$  290.0787; found 290.0784.

#### 6,7-dimethoxy-3-phenylisoquinoline *N*-oxide (4u)

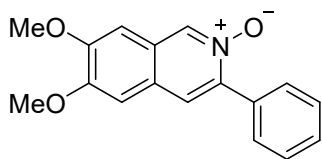

Reaction temperature was 90  $^{\circ}\text{C}$ . White solid (100 mg, 71 % yield, known product), mp 215 - 217  $^{\circ}\text{C}$ .  $^1\text{H}$  NMR (400 MHz, DMSO-  $d_6$ ):  $\delta$  8.83 (s, 1H), 7.92 (s, 1H), 7.79 - 7.81 (m, 2H), 7.43 - 7.51 (m, 3H), 7.39 (s, 1H), 7.32 (s, 1H), 3.91 (s, 3H), 3.90 (s, 3H) ppm;  $^{13}\text{C}$  NMR (100 MHz, DMSO-  $d_6$ ):  $\delta$  152.0, 151.7, 144.1, 135.3, 133.9, 130.1, 129.2, 128.3, 125.6, 125.4, 123.7, 106.0, 103.4, 56.2 ppm; IR (KBr): 1273, 752  $\text{cm}^{-1}$ . HRMS (ESI)  $m/z$ : calcd for  $\text{C}_{17}\text{H}_{16}\text{NO}_3$   $[\text{M}+\text{H}]^+$  282.1125; found 282.1122.

#### 7-hydroxy-3-phenylisoquinoline *N*-oxide (4v)

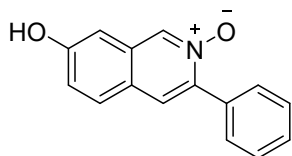

Reaction temperature was 120  $^{\circ}\text{C}$ . White solid (80 mg, 67 % yield, new product), mp 232 - 234  $^{\circ}\text{C}$ .  $^1\text{H}$  NMR (400 MHz, DMSO-  $d_6$ ):  $\delta$  10.35 (s, 1H), 8.89 (s, 1H), 7.99 (s, 1H), 7.77 - 7.84 (m, 3H), 7.46 - 7.50 (m, 3H), 7.10 - 7.17 (m, 2H) ppm;  $^{13}\text{C}$  NMR (100 MHz, DMSO-  $d_6$ ):  $\delta$  158.2, 143.4, 135.1, 133.8, 131.2, 130.1, 129.2, 129.1, 128.2, 125.0, 123.6, 121.6, 105.6 ppm; IR (KBr): 3708, 2924, 2852, 1753, 1272, 752  $\text{cm}^{-1}$ . HRMS (ESI)  $m/z$ : calcd for  $\text{C}_{15}\text{H}_{12}\text{NO}_2$   $[\text{M}+\text{H}]^+$  238.0863; found 238.0861.

#### 3,8-dipentylpyrido[3,4-g]isoquinoline *N,N*-dioxide (4w)

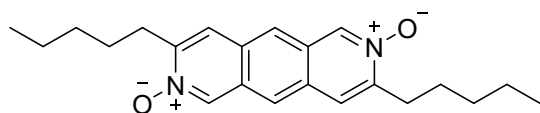

Reaction temperature was 90 °C. Light yellow solid (169 mg, 96 % yield, new product), mp 242 - 244 °C. <sup>1</sup>H NMR (400 MHz, CDCl<sub>3</sub>): δ 8.88 (s, 2H), 8.09 (s, 2H), 7.72 (s, 2H), 3.05 - 3.08 (m, 4H), 1.82 - 1.85 (m, 4H), 1.40 - 1.50 (m, 8H), 0.95 (t, *J* = 6.8 Hz, 1H) ppm; <sup>13</sup>C NMR (100 MHz, CDCl<sub>3</sub>): δ 150.6, 135.9, 127.5, 121.3, 31.5, 30.2, 26.7, 22.5, 14.0 ppm; IR (KBr): 3053, 2952, 2925, 2852, 1641, 1410, 1299, 1179, 1140, 749 cm<sup>-1</sup>. HRMS (ESI) *m/z*: calcd for C<sub>22</sub>H<sub>29</sub>N<sub>2</sub>O<sub>2</sub> [M+H]<sup>+</sup> 353.2224; found 353.2221.

#### 2-phenylbenzo[*f*]isoquinoline *N*-oxide (4x)

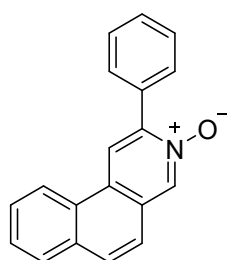

Reaction temperature was 120 °C. White solid (81 mg, 60 % yield, new product), mp 167 -169 °C. <sup>1</sup>H NMR (400 MHz, DMSO- d<sub>6</sub>): δ 9.12 (s, 1H), 8.89 - 8.91 (m, 2H), 7.94 - 8.03 (m, 4H), 7.71 - 7.81 (m, 3H), 7.51 - 7.57 (m, 3H) ppm; <sup>13</sup>C NMR (100 MHz, DMSO- d<sub>6</sub>): δ 146.9, 137.5, 133.6, 132.5, 130.7, 130.4, 129.6, 129.3, 128.7, 128.5, 128.4, 128.3, 126.5, 124.3, 122.7, 121.4 ppm; IR (KBr): 1263, 751 cm<sup>-1</sup>. HRMS (ESI) *m/z*: calcd for C<sub>19</sub>H<sub>14</sub>NO [M+H]<sup>+</sup> 272.1070; found 272.1068.

#### isoquinoline *N*-oxide (4y)

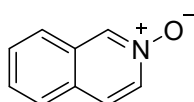

Reaction temperature was 90 °C. Pale green solid (64 mg, 88 % yield, known product), mp 56 - 58 °C. <sup>1</sup>H NMR (400 MHz, DMSO- d<sub>6</sub>): δ 8.96 (s, 1H), 8.15 - 8.17 (m, 1H), 7.88 - 7.97 (m, 3H), 7.59 - 7.69 (m, 2H) ppm; <sup>13</sup>C NMR (100 MHz, DMSO- d<sub>6</sub>): δ 137.5, 135.5, 130.0, 129.8, 128.8, 128.3, 127.2, 125.2, 125.0 ppm; IR (KBr): 3062, 1326, 1177, 1124, 736 cm<sup>-1</sup>. HRMS (ESI) *m/z*: calcd for C<sub>9</sub>H<sub>8</sub>NO [M+H]<sup>+</sup> 146.0600; found 146.0599.

#### 1-methyl-3-phenylisoquinoline *N*-oxide (4z)

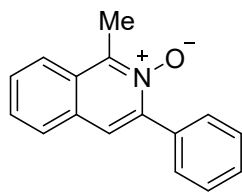

Reaction temperature was 50 °C. Yellow oil (41 mg, 35 % yield, known product). <sup>1</sup>H NMR (400 MHz, CDCl<sub>3</sub>): δ 7.97 - 7.99 (m, 1H), 7.82 - 7.85 (m, 1H), 7.76 - 7.79 (m, 2H), 7.73 (s, 1H), 7.60 - 7.69 (m, 2H), 7.43 - 7.48 (m, 3H), 2.94 (s, 3H) ppm; <sup>13</sup>C NMR (100 MHz, CDCl<sub>3</sub>): δ 146.6, 133.5, 129.8, 129.1, 128.8, 128.6, 128.2, 128.1, 127.5, 124.1, 122.8, 13.7 ppm; IR (KBr): 3057, 2955, 2924, 2853, 1713, 1222, 760, 698 cm<sup>-1</sup>. HRMS (ESI) m/z: calcd for C<sub>16</sub>H<sub>14</sub>NO [M+H]<sup>+</sup> 236.1070; found 236.1068.

### 3-phenylisoquinoline (5a)

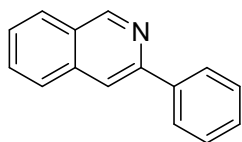

Pale yellow solid (41 mg, 98 % yield, known product), mp 104 - 106 °C. <sup>1</sup>H NMR (400 MHz, CDCl<sub>3</sub>): δ 9.37 (s, 1H), 8.15 - 8.18 (m, 2H), 8.09 (s, 1H), 8.01 (d, *J* = 8.0 Hz, 1H), 7.89 (d, *J* = 8.0 Hz, 1H), 7.69 - 7.73 (m, 1H), 7.53 - 7.63 (m, 3H), 7.43 - 7.47 (m, 1H) ppm; <sup>13</sup>C NMR (100 MHz, CDCl<sub>3</sub>): δ 152.4, 151.3, 139.6, 136.7, 130.5, 128.8, 128.5, 127.8, 127.6, 127.1, 127.0, 126.9, 116.5 ppm; IR (KBr): 3035, 2922, 2852, 1452, 883, 761, 685 cm<sup>-1</sup>. HRMS (ESI) m/z: calcd for C<sub>15</sub>H<sub>12</sub>N [M+H]<sup>+</sup> 206.0964; found 206.0963.

### isoquinoline (5l)

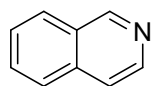

Pale yellow oil (25 mg, 97% yield, known product). <sup>1</sup>H NMR (400 MHz, CDCl<sub>3</sub>): δ 9.42 (s, 1H), 7.59 (d, *J* = 5.6 Hz, 1H), 8.03 (d, *J* = 8.4 Hz, 1H), 7.87 (d, *J* = 8.4 Hz, 1H), 7.76 - 7.81 (m, 2H), 7.65 - 7.69 (m, 1H) ppm; <sup>13</sup>C NMR (100 MHz, CDCl<sub>3</sub>): δ 152.6, 141.3, 136.3, 131.9, 128.8, 128.3, 128.2, 126.6, 121.8 ppm; IR (KBr): 3057, 2924, 1630, 1454, 1384, 829, 748 cm<sup>-1</sup>. HRMS (ESI) m/z: calcd for C<sub>9</sub>H<sub>8</sub>N [M+H]<sup>+</sup> 130.0651; found 130.0651.

### 6-methyl-3-phenylisoquinoline (5p)

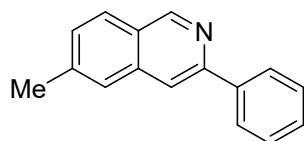

Pale yellow solid (43 mg, 98 % yield, known product), mp 176 - 178 °C. <sup>1</sup>H NMR (400 MHz, CDCl<sub>3</sub>): δ 9.30 (s, 1H), 8.13 - 8.16 (m, 2H), 8.00 (s, 1H), 7.90 (d, *J* = 8.0 Hz, 1H), 7.65 (s, 1H), 7.52 - 7.56 (m, 2H), 7.42 - 7.46 (m, 2H), 2.58 (s, 3H) ppm; <sup>13</sup>C NMR (100 MHz, CDCl<sub>3</sub>): δ 152.0, 151.3, 140.9, 139.8, 137.0, 129.4, 128.8, 128.4, 127.3, 127.0, 126.3, 125.8, 116.1, 22.1 ppm; IR (KBr): 3052, 3025, 2977, 2921, 2851, 1454, 900, 700 cm<sup>-1</sup>. HRMS (ESI) *m/z*: calcd for C<sub>16</sub>H<sub>14</sub>N [M+H]<sup>+</sup> 220.1121; found 220.1119.

### 3-phenylisoquinoline-1-carbonitrile (6a)

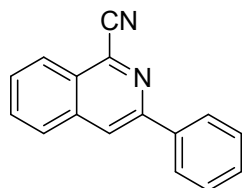

White solid (113 mg, 98 % yield, known product), mp 142 - 144 °C. <sup>1</sup>H NMR (400 MHz, CDCl<sub>3</sub>): δ 8.35 (d, *J* = 8.4 Hz, 1H), 8.30 (s, 1H), 8.15 - 8.18 (m, 2H), 8.00 (d, *J* = 8 Hz, 1H), 7.75 - 7.85 (m, 2H), 7.53 - 7.58 (m, 2H), 7.47 - 7.51 (m, 1H) ppm; <sup>13</sup>C NMR (100 MHz, CDCl<sub>3</sub>): δ 151.8, 137.6, 136.9, 134.6, 131.8, 129.49, 129.48, 129.0, 128.4, 127.7, 127.0, 125.3, 120.1, 116.0 ppm; IR (KBr): 3060, 2921, 2851, 2228, 1621, 1571, 1332, 1285, 897, 756, 681 cm<sup>-1</sup>. HRMS (ESI) *m/z*: calcd for C<sub>16</sub>H<sub>11</sub>N<sub>2</sub> [M+H]<sup>+</sup> 231.0917; found 231.0915.

### isoquinoline-1-carbonitrile (6l)

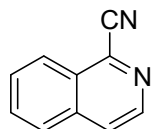

White solid (66 mg, 86 % yield, known product), mp 89 - 91 °C. <sup>1</sup>H NMR (400 MHz, CDCl<sub>3</sub>): δ 8.66 (dd, *J* = 1.6, 5.6 Hz, 1H), 8.33 - 8.37 (m, 1H), 7.96 - 7.98 (m, 1H), 7.91 - 7.93 (m, 1H), 7.79 - 7.87 (m, 2H) ppm; <sup>13</sup>C NMR (100 MHz, CDCl<sub>3</sub>): δ 143.3, 135.9, 134.8, 131.8, 129.9, 129.3, 127.3, 125.3, 124.5, 115.8 ppm; IR (KBr): 3058, 2921, 2850, 2227, 1621, 1576, 1386, 1340, 837, 747, 659 cm<sup>-1</sup>. HRMS (ESI) *m/z*: calcd for C<sub>10</sub>H<sub>7</sub>N<sub>2</sub> [M+H]<sup>+</sup> 155.0604; found 155.0601.

### 6-methyl-3-phenylisoquinoline-1-carbonitrile (6p)

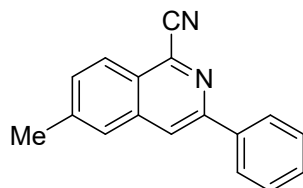

White solid (116 mg, 95 % yield, new product), mp 155 - 157 °C. <sup>1</sup>H NMR (400 MHz, CDCl<sub>3</sub>): δ 8.13 - 8.21 (m, 4H), 7.72 (s, 1H), 7.46 - 7.59 (m, 4H), 2.61 (s, 3H) ppm; <sup>13</sup>C NMR (100 MHz, CDCl<sub>3</sub>): δ 151.8, 142.6,



137.7, 137.2, 134.1, 131.9, 129.4, 129.0, 127.0, 126.9, 126.4, 125.0, 119.5, 116.1, 22.1 ppm; IR (KBr): 3057, 2919, 2847, 2232, 1624, 1574, 1378, 815, 767, 694  $\text{cm}^{-1}$ . HRMS (ESI)  $m/z$ : calcd for  $\text{C}_{17}\text{H}_{13}\text{N}_2$   $[\text{M}+\text{H}]^+$  245.1073; found 245.1070.

**(R)-2-(isoquinolin-1-yl)-4-phenyl-4,5-dihydrooxazole (7l)**

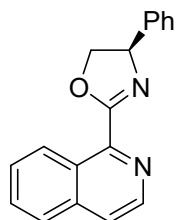

Pale yellow oil (82 mg, 30 % yield, known product).  $[\alpha]_{\text{D}}^{25} = +90.1$  (c 0.091,  $\text{CH}_2\text{Cl}_2$ );  $^1\text{H}$  NMR (400 MHz,  $\text{CDCl}_3$ ):  $\delta$  9.37 - 9.40 (m, 1H), 8.70 (d,  $J = 5.6$  Hz, 1H), 7.88 - 7.91 (m, 1H), 7.82 (d,  $J = 5.6$  Hz, 1H), 7.67 - 7.76 (m, 2H), 7.40 - 7.46 (m, 4H), 7.32 - 7.36 (m, 1H), 5.67 (dd,  $J = 8.8, 10.4$  Hz, 1H), 4.95 (dd,  $J = 8.8, 10.4$  Hz, 1H), 4.42 (t,  $J = 8.4$  Hz, 1H) ppm;  $^{13}\text{C}$  NMR (100 MHz,  $\text{CDCl}_3$ ):  $\delta$  163.2, 146.1, 142.0, 141.8, 136.8, 130.5, 128.9, 128.7, 127.8, 127.54, 127.52, 127.1, 126.9, 123.6, 74.2, 71.4 ppm; IR (KBr): 3054, 2922, 1633, 1130, 998, 831, 752, 698  $\text{cm}^{-1}$ . HRMS (ESI)  $m/z$ : calcd for  $\text{C}_{18}\text{H}_{15}\text{N}_2\text{O}$   $[\text{M}+\text{H}]^+$  275.1175; found 275.1176.

**2-(but-1-yn-1-yl)-4,5-dimethoxybenzaldehyde (8)**

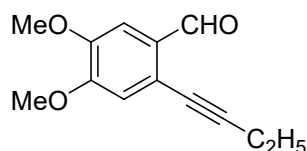

Pale yellow solid (1.51 g, 69 % yield, known product).  $^1\text{H}$  NMR (400 MHz,  $\text{CDCl}_3$ ):  $\delta$  10.39 (s, 1H), 7.38 (s, 1H), 6.94 (s, 1H), 3.97 (s, 3H), 3.95 (s, 3H), 2.47 - 2.53 (q,  $J = 7.6$  Hz, 2H), 1.29 (t,  $J = 7.6$  Hz, 3H) ppm;  $^{13}\text{C}$  NMR (100 MHz,  $\text{CDCl}_3$ ):  $\delta$  190.9, 153.6, 149.2, 130.2, 122.7, 114.4, 108.0, 97.7, 75.4, 56.2, 56.1, 13.7, 13.3 ppm.

**1-(2-(but-1-yn-1-yl)-4,5-dimethoxyphenyl)-2-phenylethan-1-one (9)**

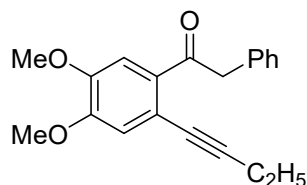

White solid (1.31 g, 85 % yield, new product).  $^1\text{H}$  NMR (400 MHz,  $\text{CDCl}_3$ ):  $\delta$  7.32 - 7.36 (m, 2H), 7.25 - 7.29 (m, 4H), 6.96 (s, 1H), 4.58 (s, 2H), 3.94 (s, 3H), 3.89 (s, 3H), 2.51 (q,  $J = 7.6$  Hz, 2H), 1.28 (t,  $J = 7.6$  Hz, 3H) ppm;  $^{13}\text{C}$  NMR (100 MHz,  $\text{CDCl}_3$ ):  $\delta$  199.4, 151.3, 148.6, 135.2, 133.4, 129.7, 129.6, 128.5, 126.7, 116.3, 115.7, 111.6, 97.3, 79.6, 56.1, 55.9, 48.3, 13.6, 13.5 ppm.

**1-(2-(but-1-yn-1-yl)-4,5-dimethoxyphenyl)-2-phenylethan-1-one *O*-methyl oxime (10)**

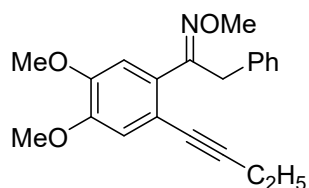

Pale yellow oil (*E* / *Z* = 3:1, 1.35 g, 100 % yield, new product). <sup>1</sup>H NMR (400 MHz, CDCl<sub>3</sub>) : δ 7.14 - 7.26 (m, 5H), 6.91 (s, 1H), 6.61 (s, 0.75 H), 6.10 (s, 0.25H), 4.27 (s, 1.5H), 4.03 (s, 2.25H), 3.90 (s, 0.75H), 3.88(s, 0.5H), 3.87 (s, 2.25H), 3.85 (s, 0.75H), 3.77 (s, 2.25H), 3.60 (s, 0.75H), 2.38 - 2.47 (m, 2H), 1.23 - 1.29 (m, 3H) ppm; <sup>13</sup>C NMR (100 MHz, CDCl<sub>3</sub>): δ 158.6, 157.1, 148.7, 148.4, 148.1, 147.9, 136.8, 136.6, 131.7, 130.0, 129.5, 129.2, 126.5, 126.1, 115.1, 115.0, 114.3, 113.8, 112.3, 110.8, 94.7, 93.4, 78.6, 78.1, 61.9, 61.8, 55.9, 55.8, 55.7, 55.6, 41.5, 35.0, 13.9, 13.7, 13.3, 13.2 ppm.

**(*Z*)-1-(2-(but-1-yn-1-yl)-4,5-dimethoxyphenyl)-2-phenylethan-1-one *O*-methyl oxime**

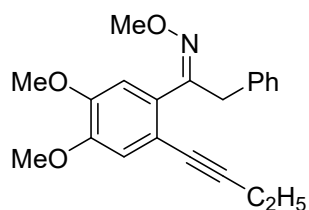

Pale yellow oil (*Z*-isomer, new product). <sup>1</sup>H NMR (400 MHz, CDCl<sub>3</sub>) : δ 7.12 - 7.24 (m, 5H), 6.88 (s, 1H), 6.07 (s, 1H), 3.87 (s, 3H), 3.85 (s, 2H), 3.82 (s, 3H), 3.57 (s, 3H), 2.41 (q, *J* = 7.6 Hz, 2H), 1.24 (t, *J* = 7.6 Hz, 3H) ppm; <sup>13</sup>C NMR (100 MHz, CDCl<sub>3</sub>): δ 157.1, 148.1, 147.9, 136.6, 130.0, 129.5, 128.2, 126.5, 114.3, 113.8, 110.8, 93.4, 78.1, 61.9, 55.7, 55.6, 41.5, 13.9, 13.2 ppm.

**1-benzyl-3-ethyl-6,7-dimethoxyisoquinoline (11)**

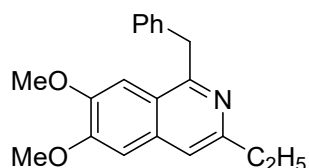

Pale yellow oil (72 mg, 62 % yield, known product). <sup>1</sup>H NMR (400 MHz, CDCl<sub>3</sub>): δ 7.21 - 7.28 (m, 6H), 7.13 - 7.17 (m, 1H), 6.99 (s, 1H), 4.60 (s, 2H), 3.98 (s, 3H), 3.83 (s, 3H), 2.94 - 3.00 (m, 2H), 1.40 (t, *J* = 7.6 Hz, 3H) ppm; <sup>13</sup>C NMR (100 MHz, CDCl<sub>3</sub>): δ 157.0, 154.7, 149.1, 139.8, 134.3, 128.5, 128.4, 121.1, 115.5, 104.9, 104.3, 55.9, 55.8, 42.8, 31.0, 14.3 ppm; IR (KBr): 2961, 2930, 1571, 1505, 1463, 1425, 1243, 1216, 1159, 703 cm<sup>-1</sup>. HRMS (ESI) *m/z*: calcd for C<sub>20</sub>H<sub>22</sub>NO<sub>2</sub> [M+H]<sup>+</sup> 308.1645; found 308.1643.

***p*-anisaldehyde (12)**

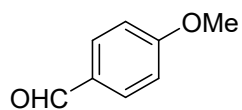

Pale yellow oil (51 mg, 75 % yield, known product).  $^1\text{H}$  NMR (400 MHz,  $\text{CDCl}_3$ ):  $\delta$  9.87 (s, 1H), 7.81 – 7.85 (m, 2H), 6.98 – 7.01 (m, 2H), 3.88 (s, 3H) ppm;  $^{13}\text{C}$  NMR (100 MHz,  $\text{CDCl}_3$ ):  $\delta$  190.8, 164.5, 131.9, 129.9, 114.2, 55.5 ppm. HRMS (ESI)  $m/z$ : calcd for  $\text{C}_8\text{H}_9\text{O}_2$   $[\text{M}+\text{H}]^+$  137.0597; found 137.0596.

## L. NMR Spectra

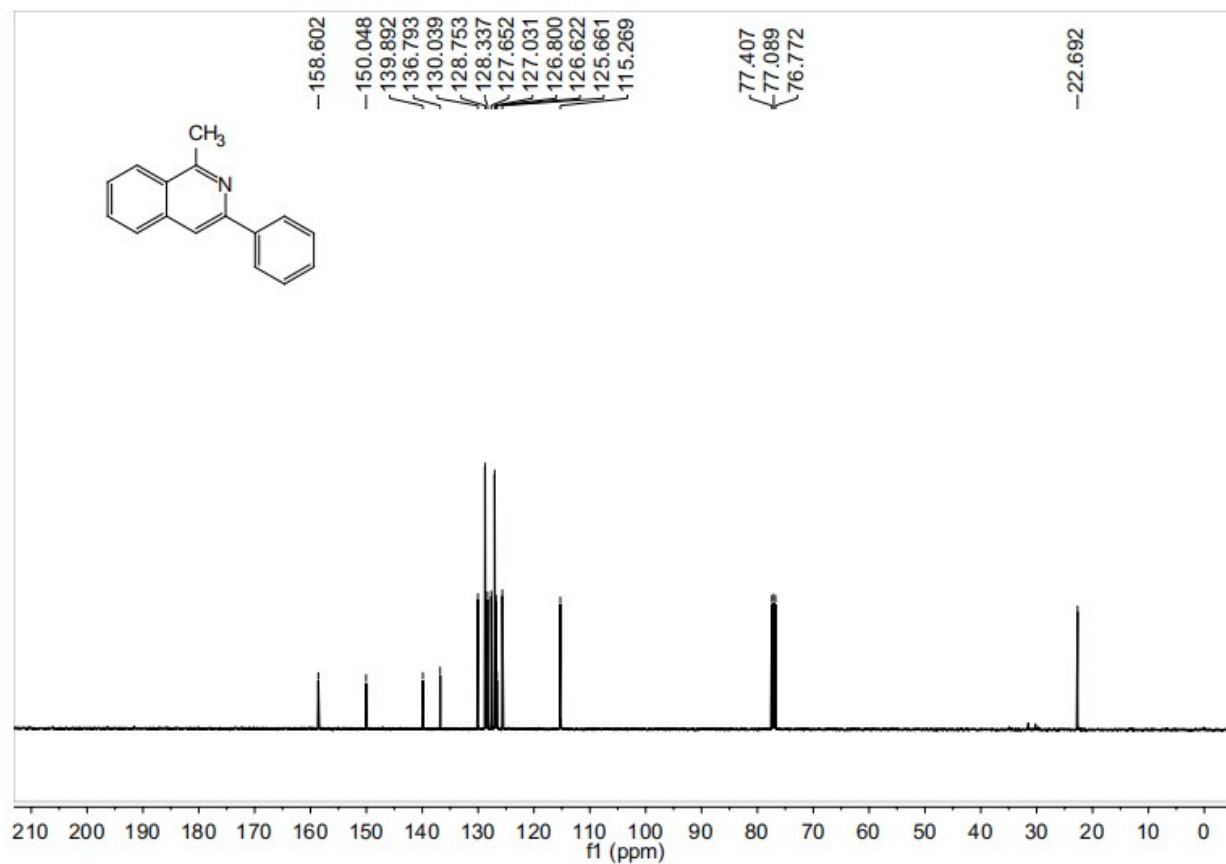

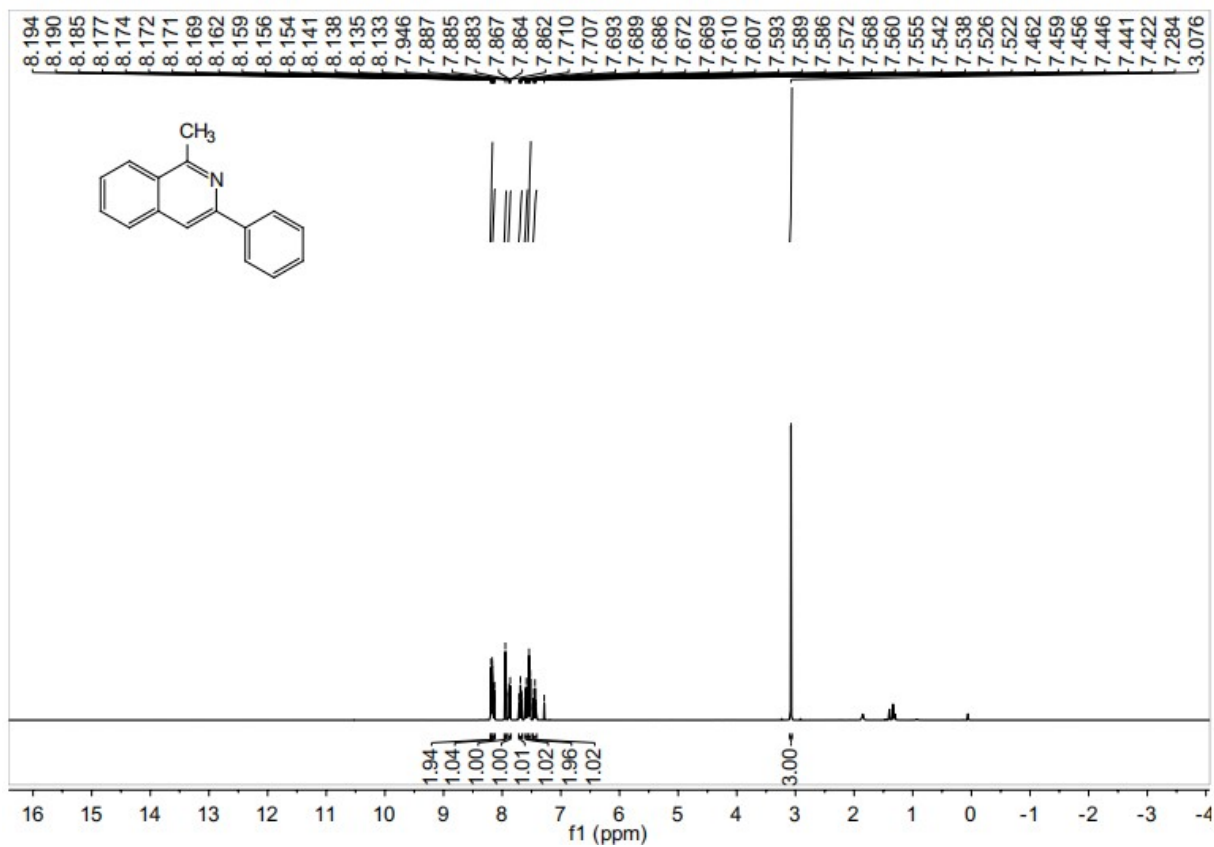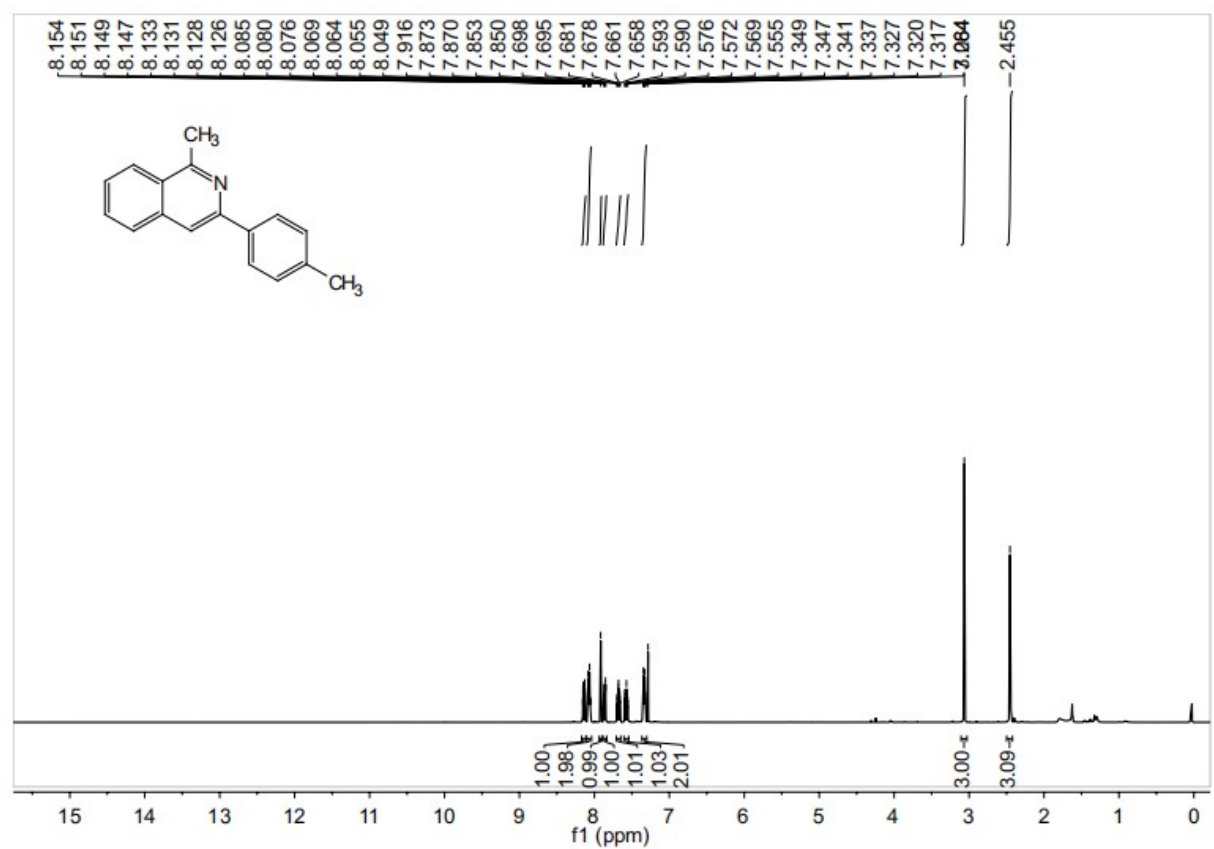

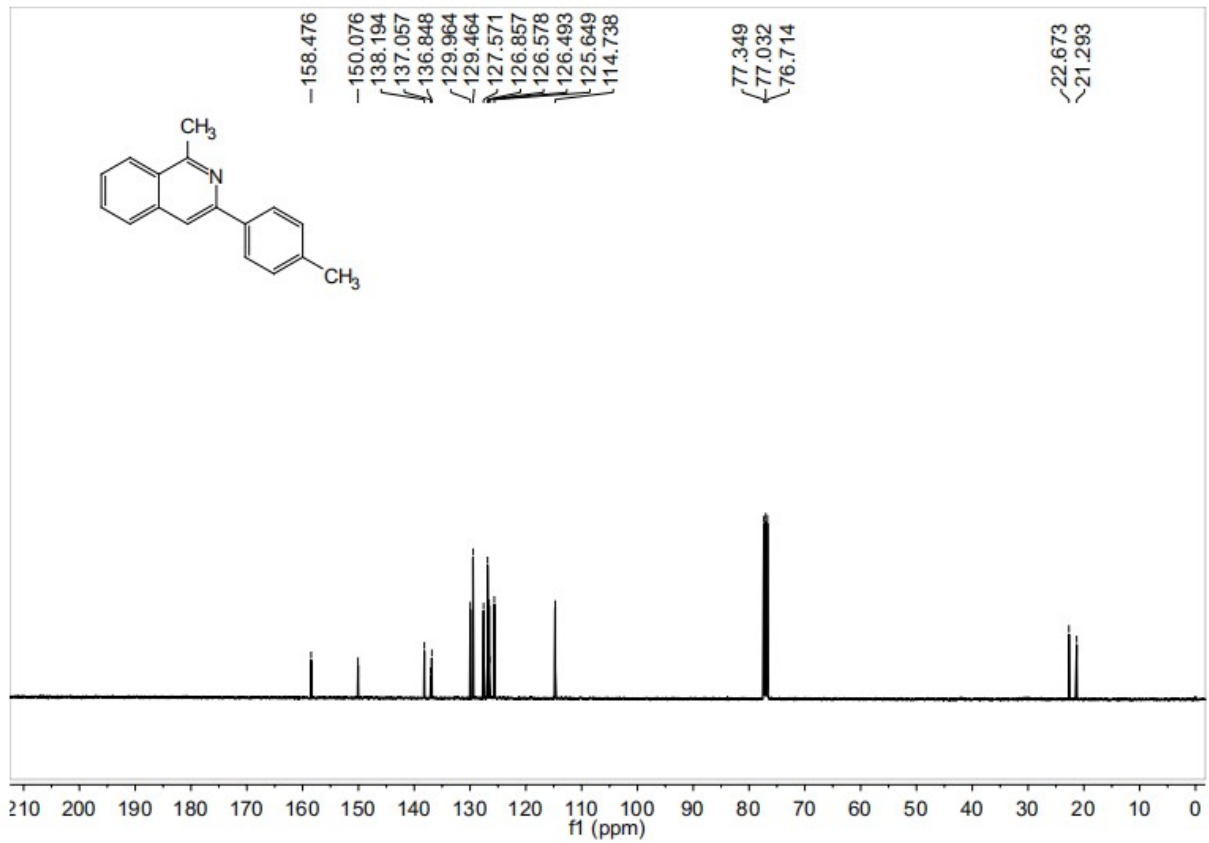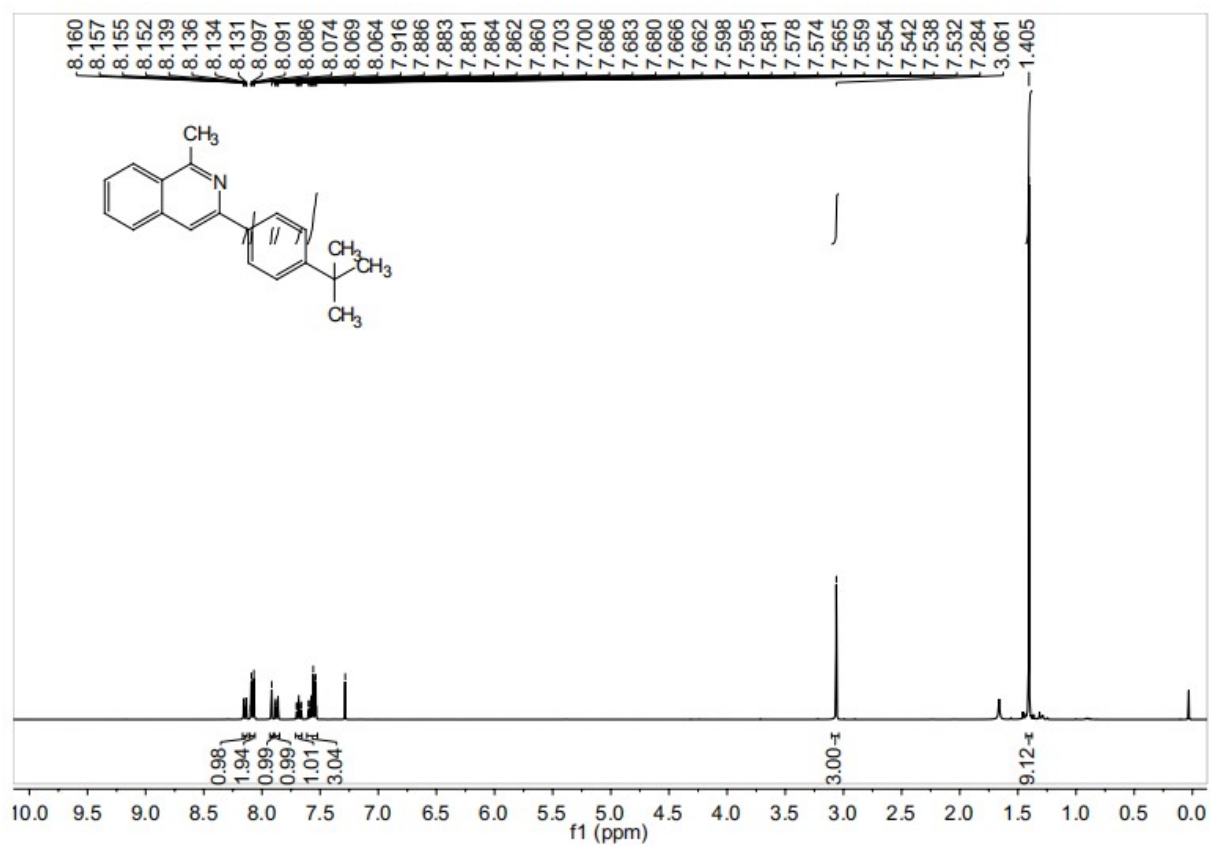

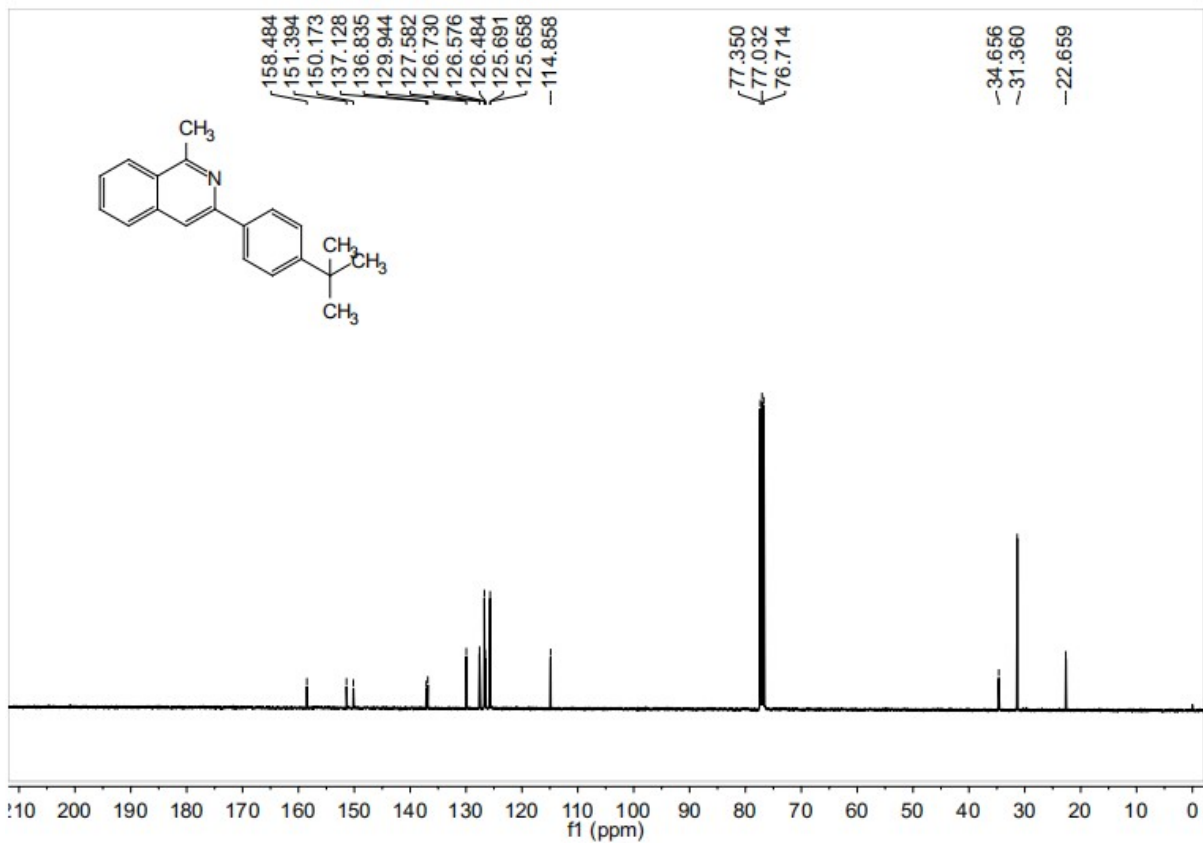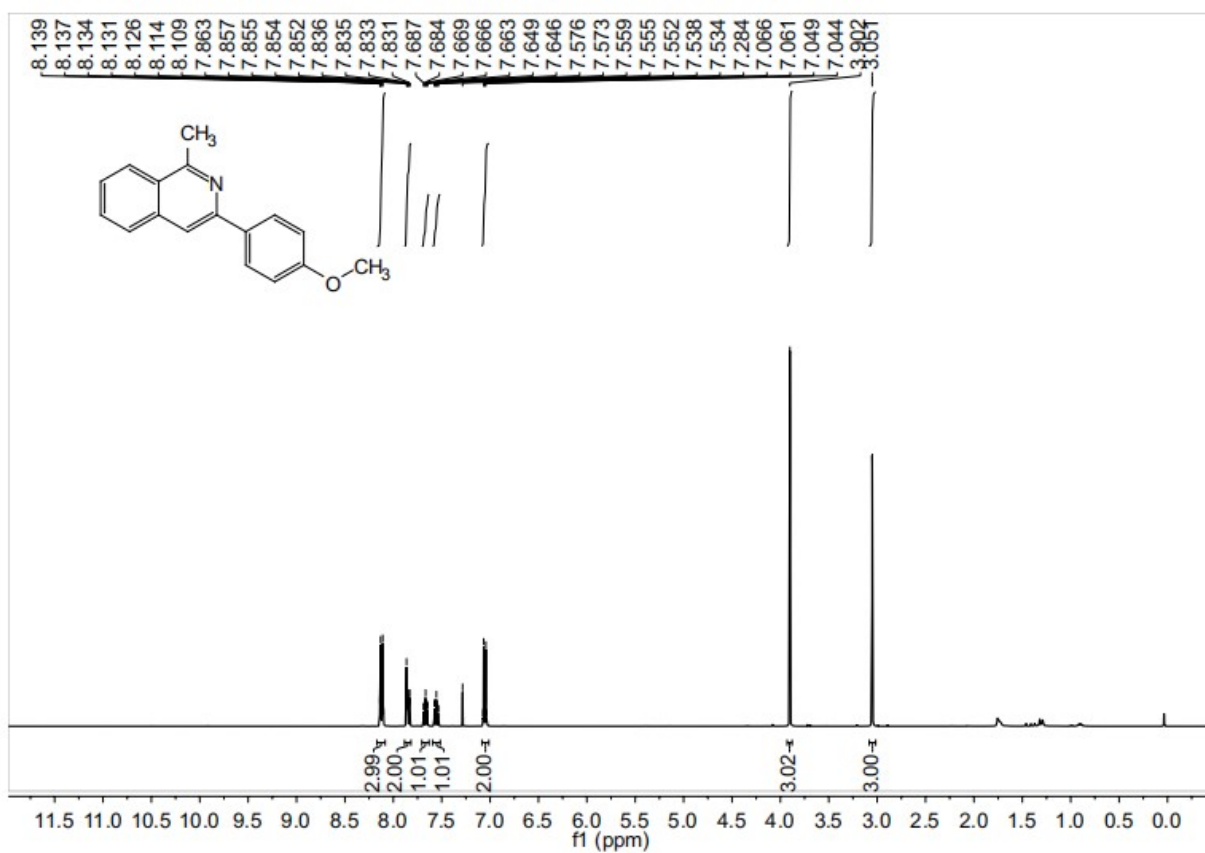

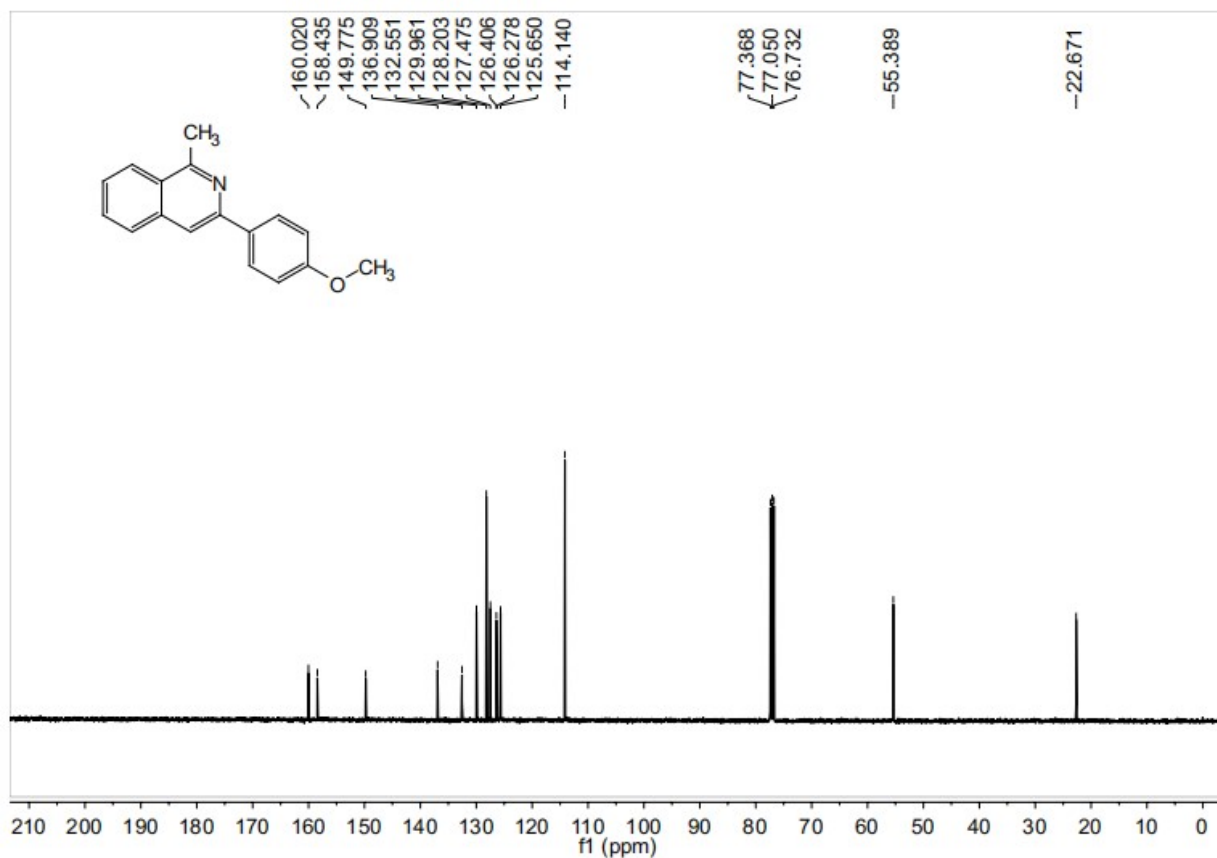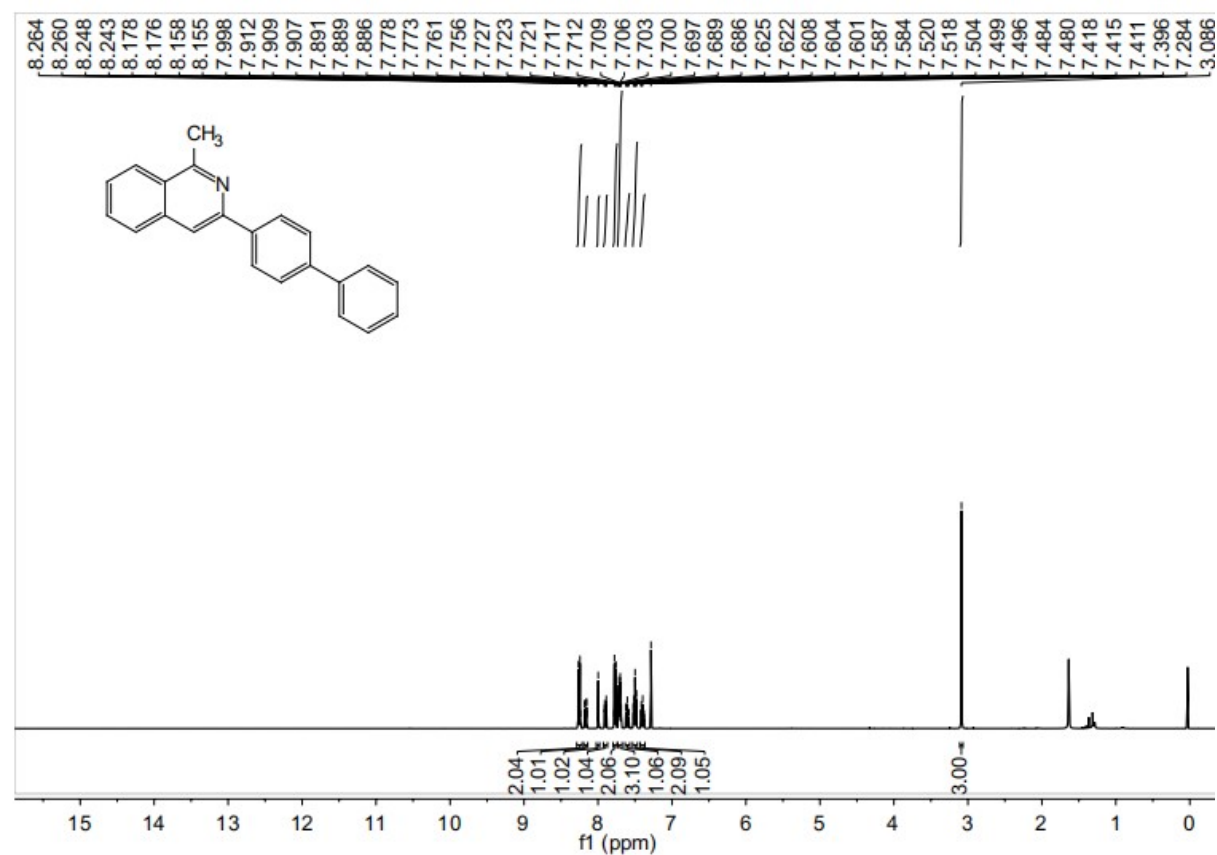

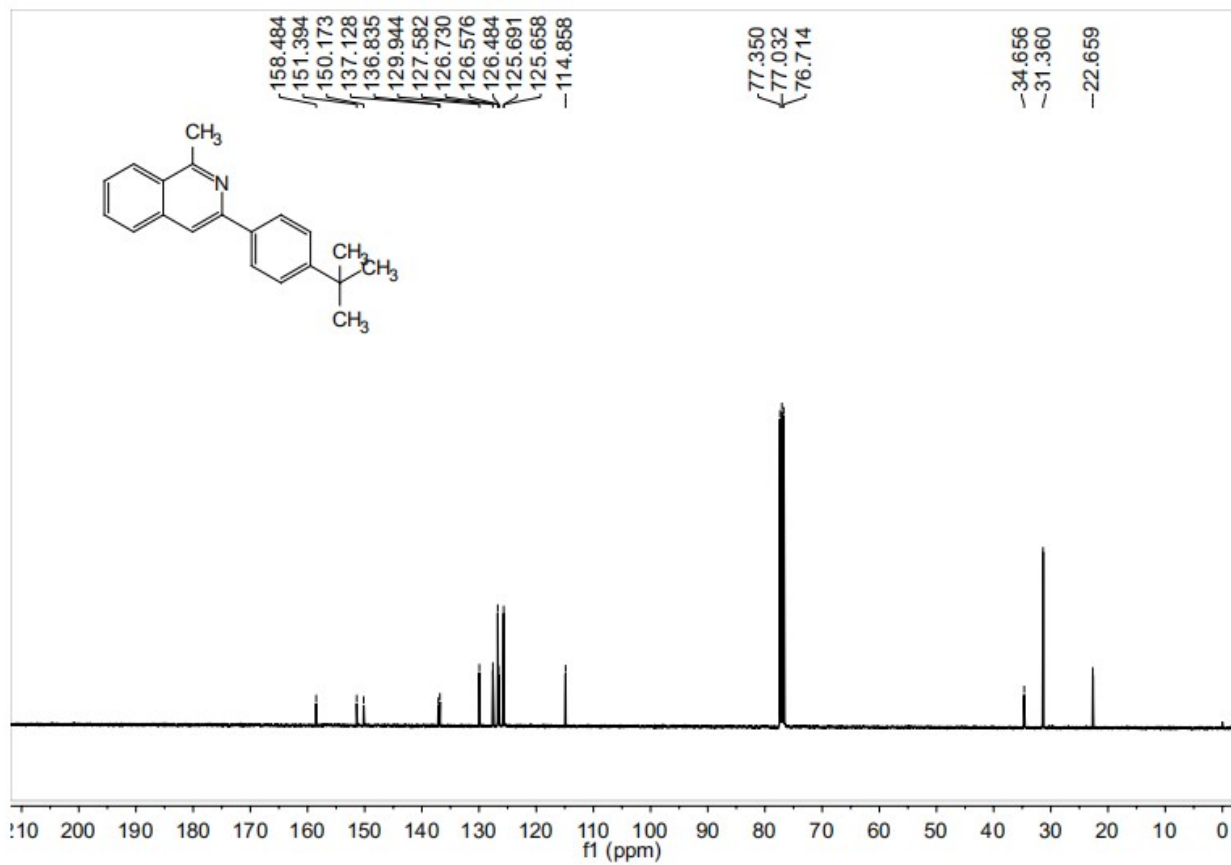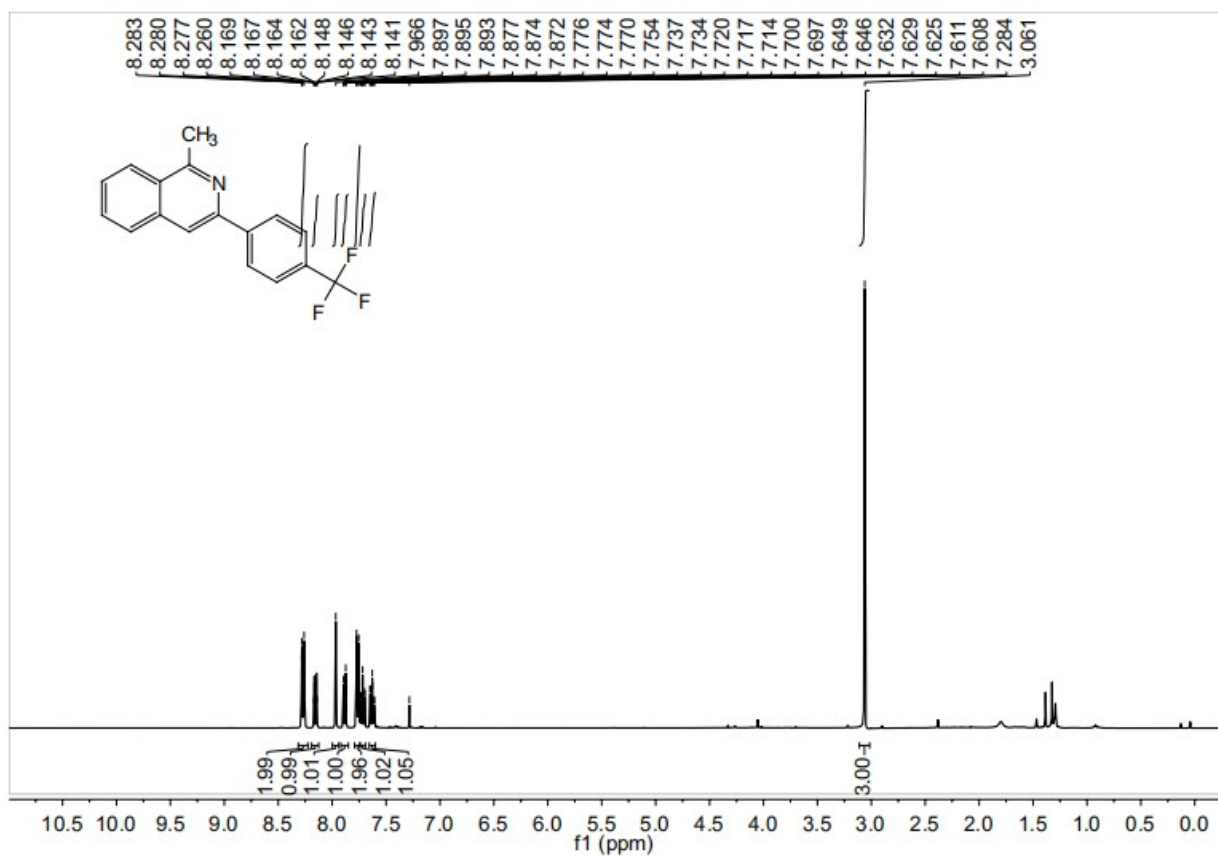



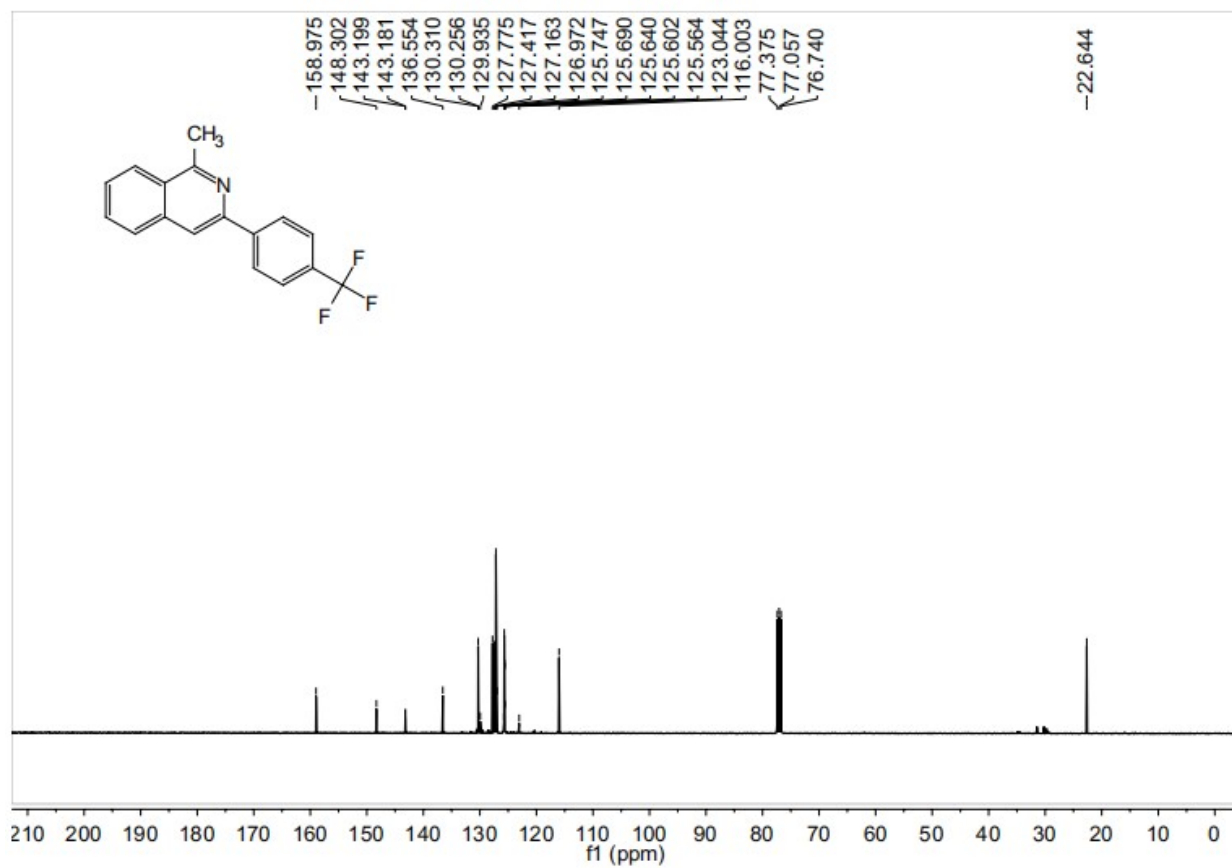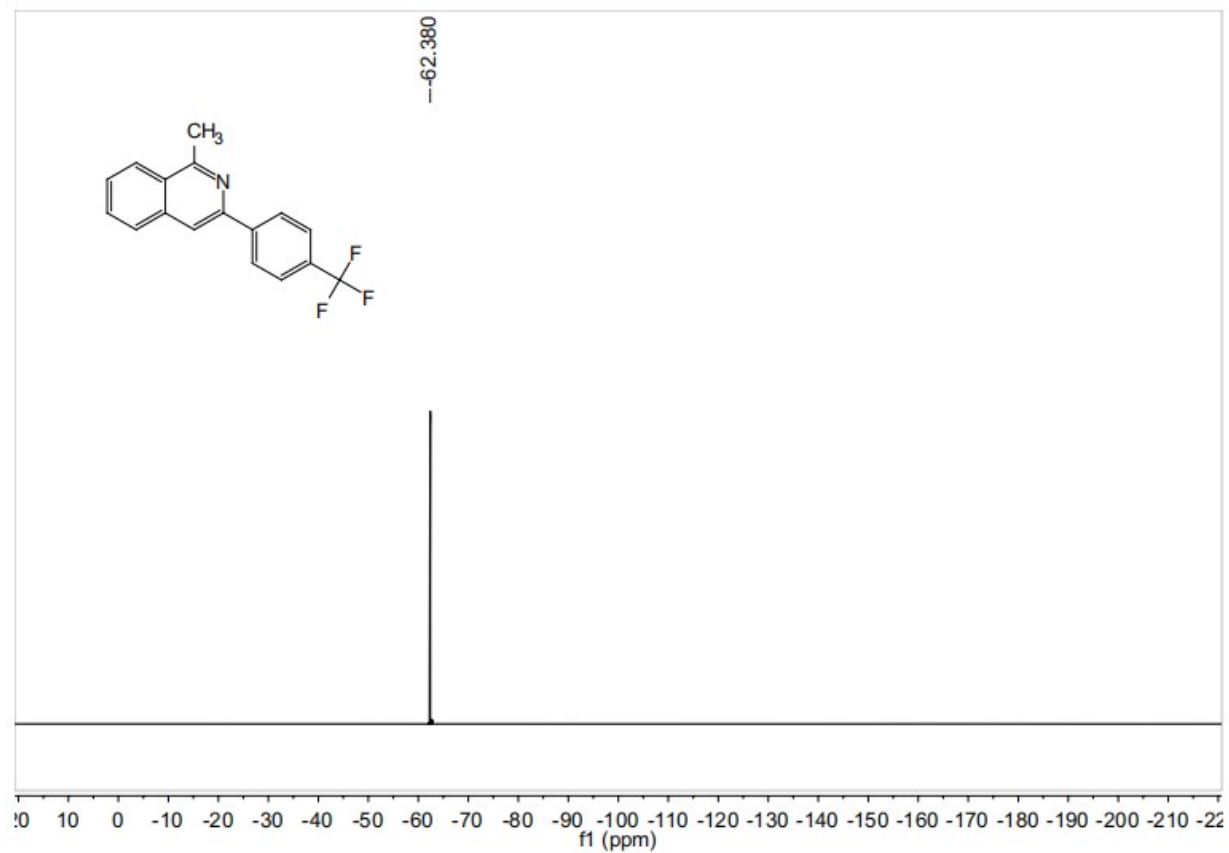

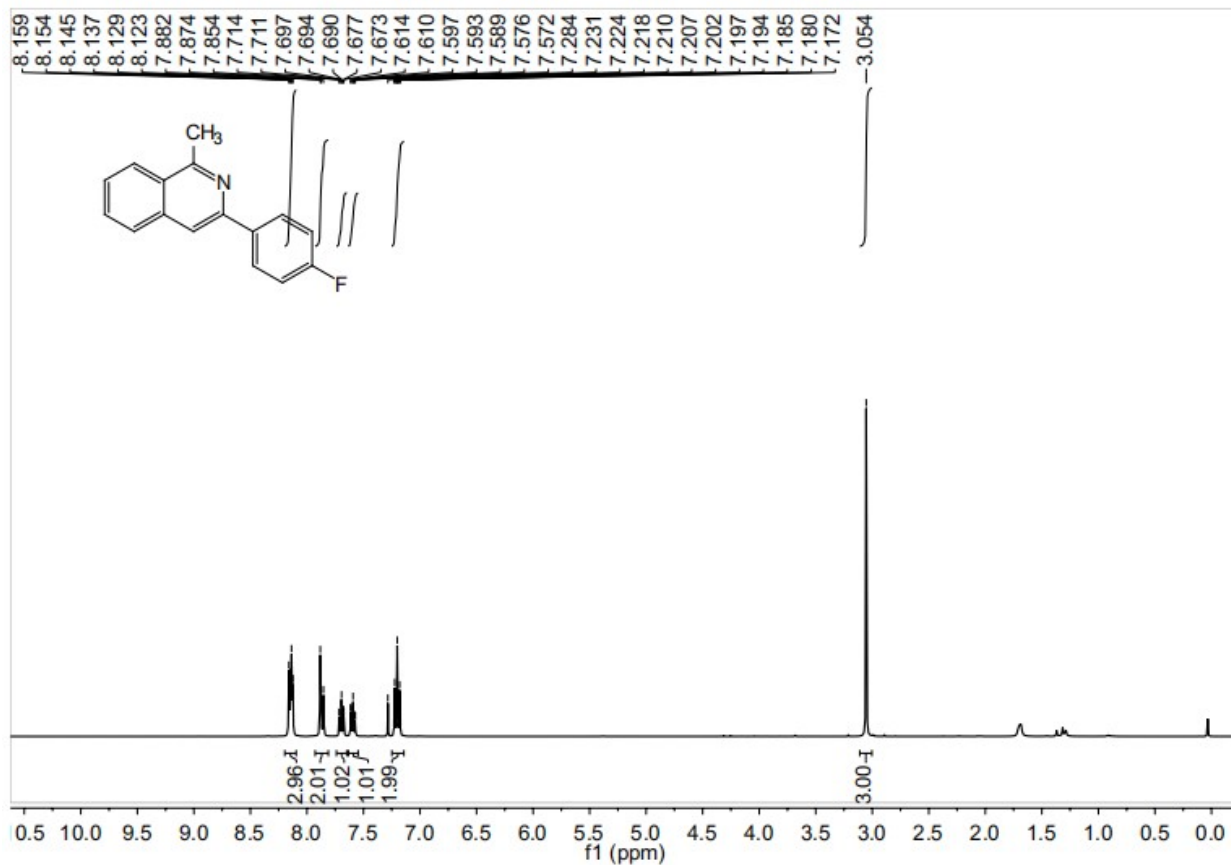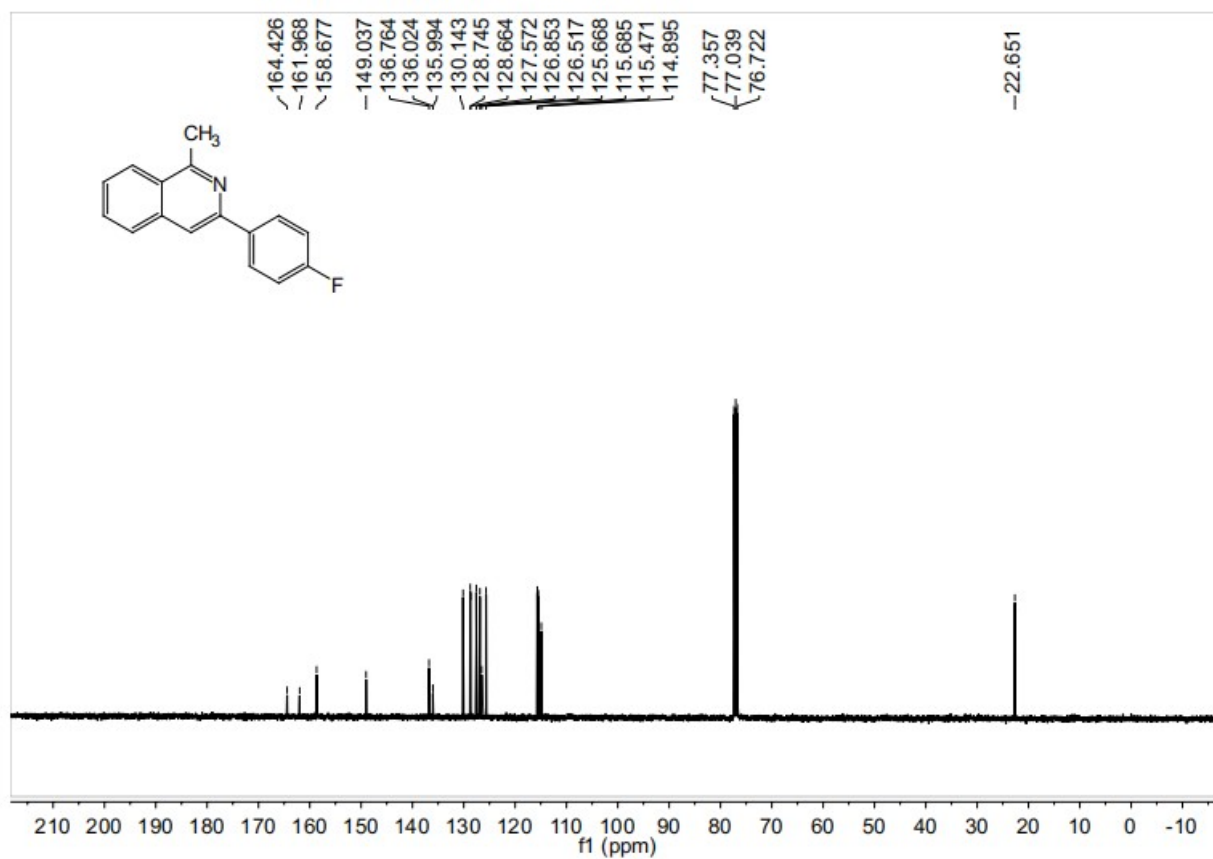

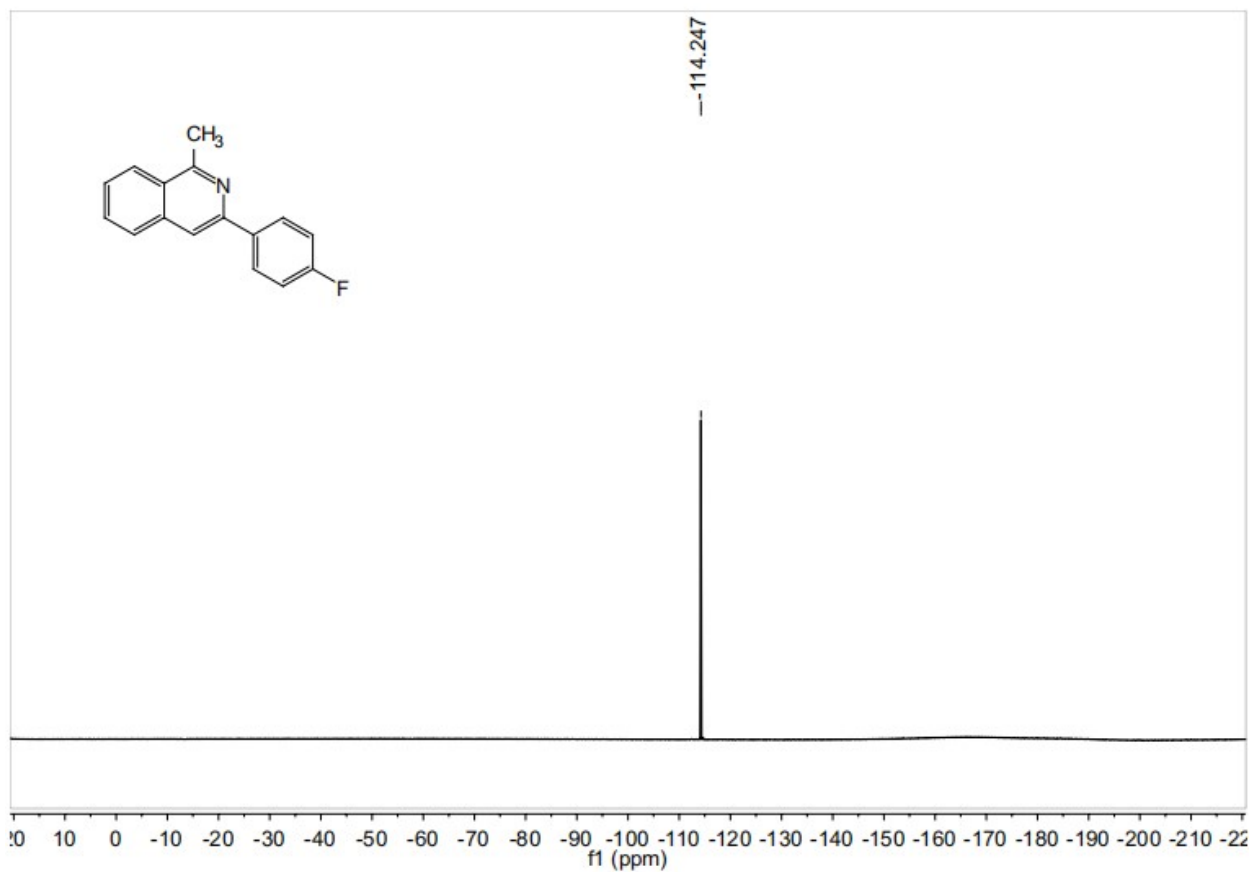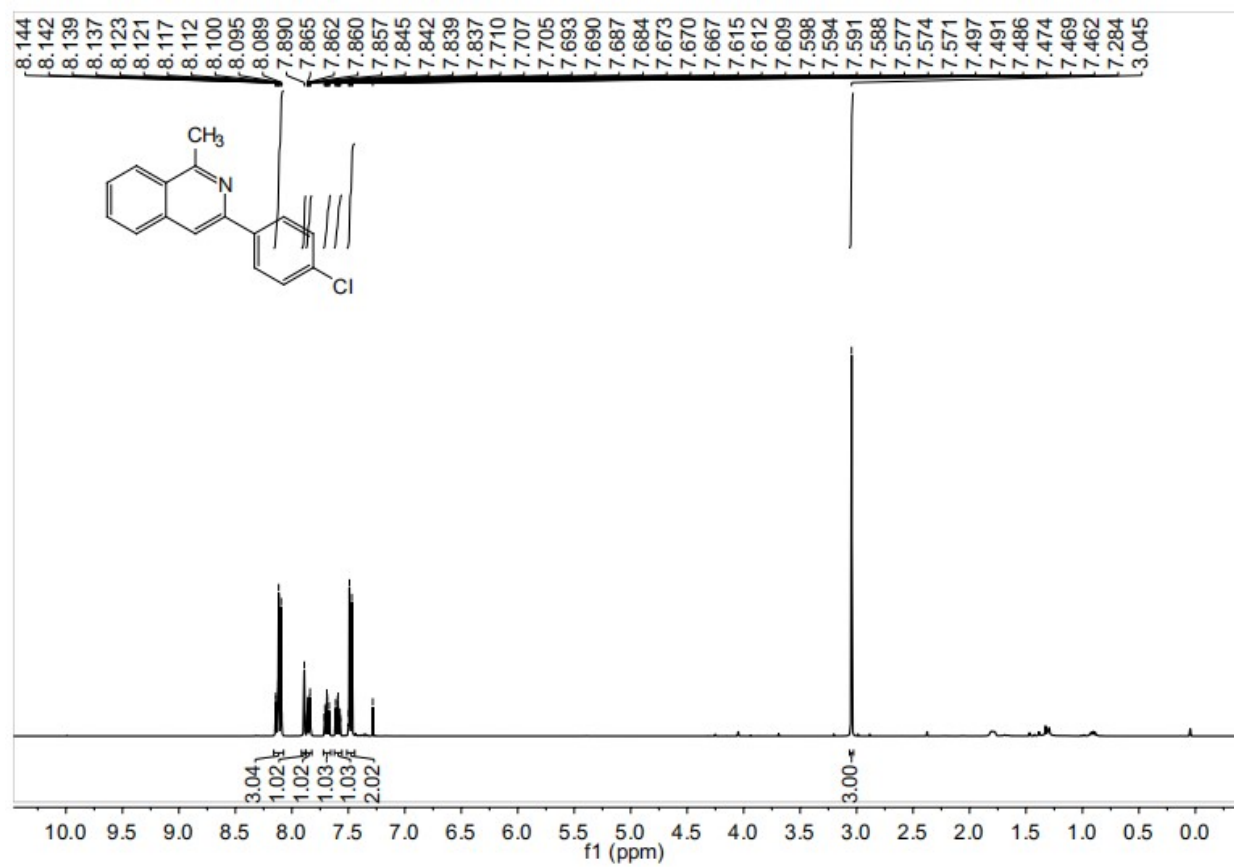

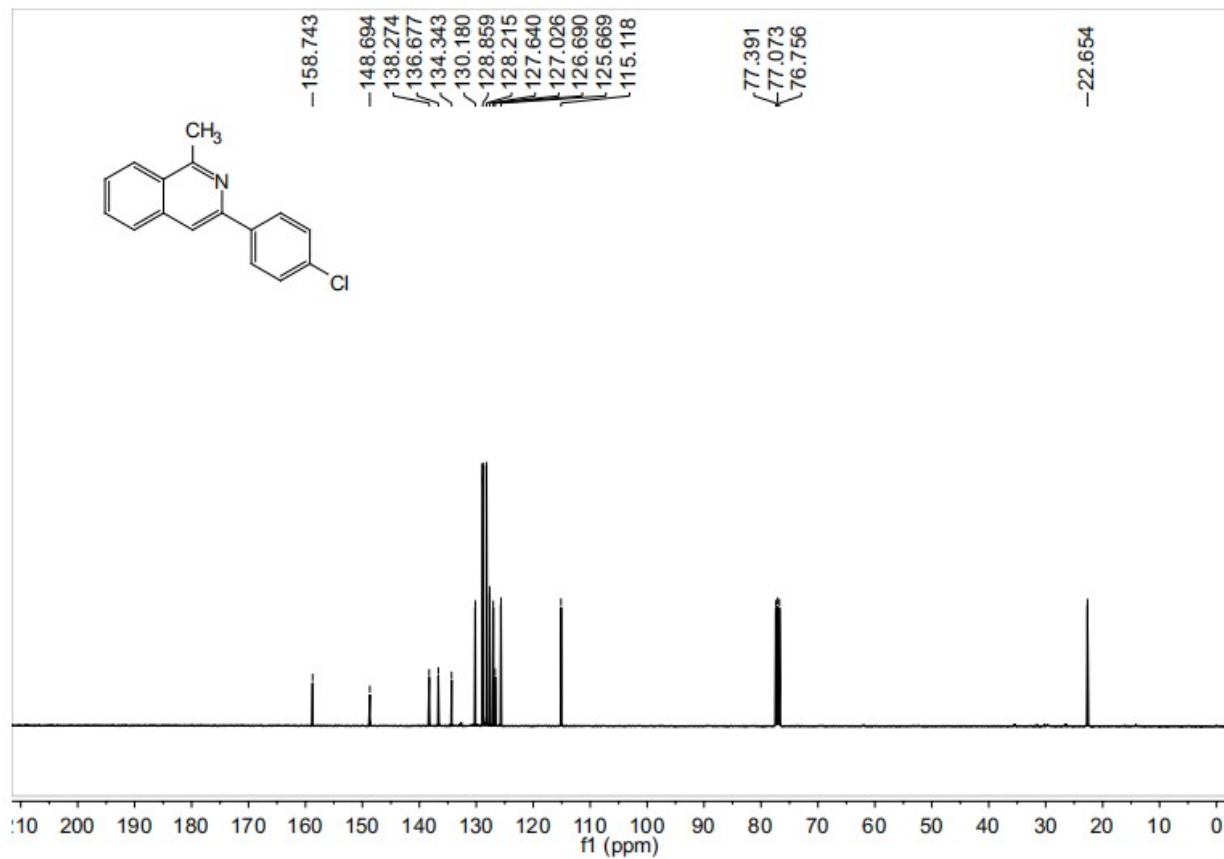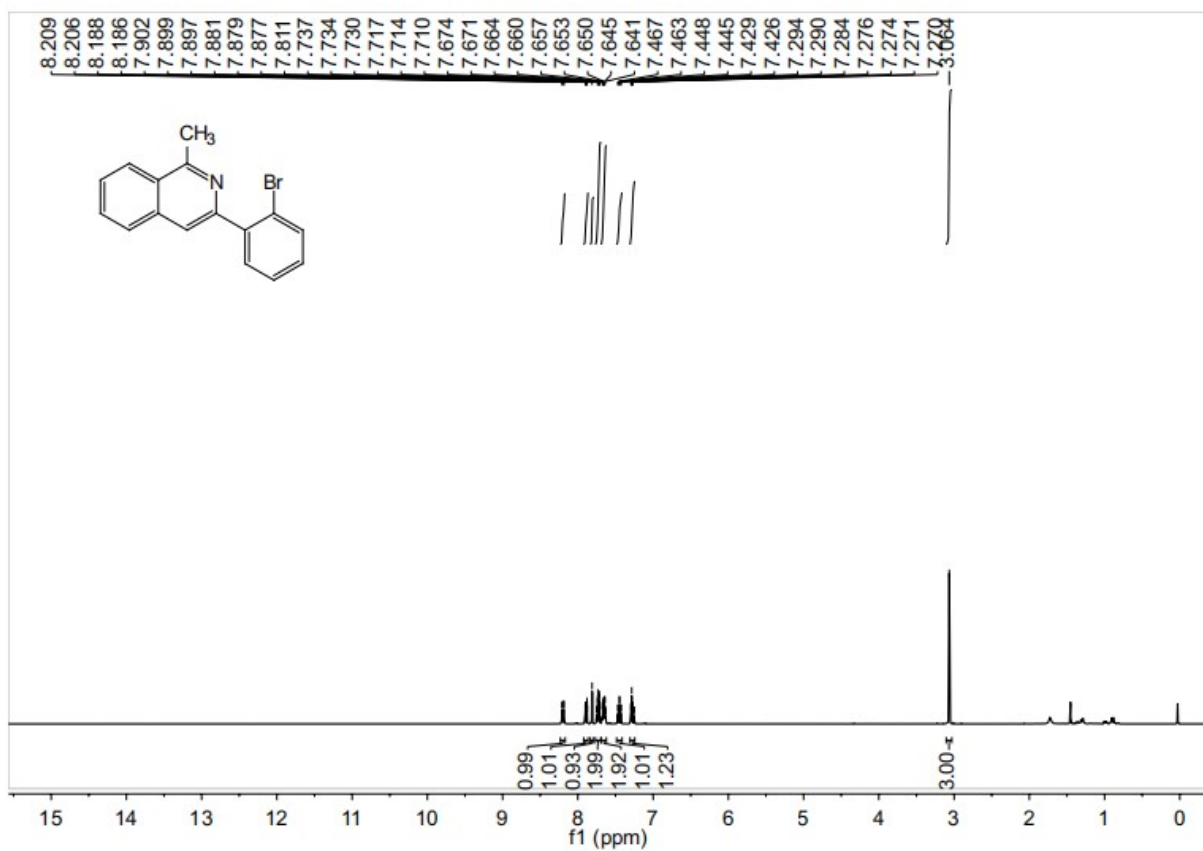

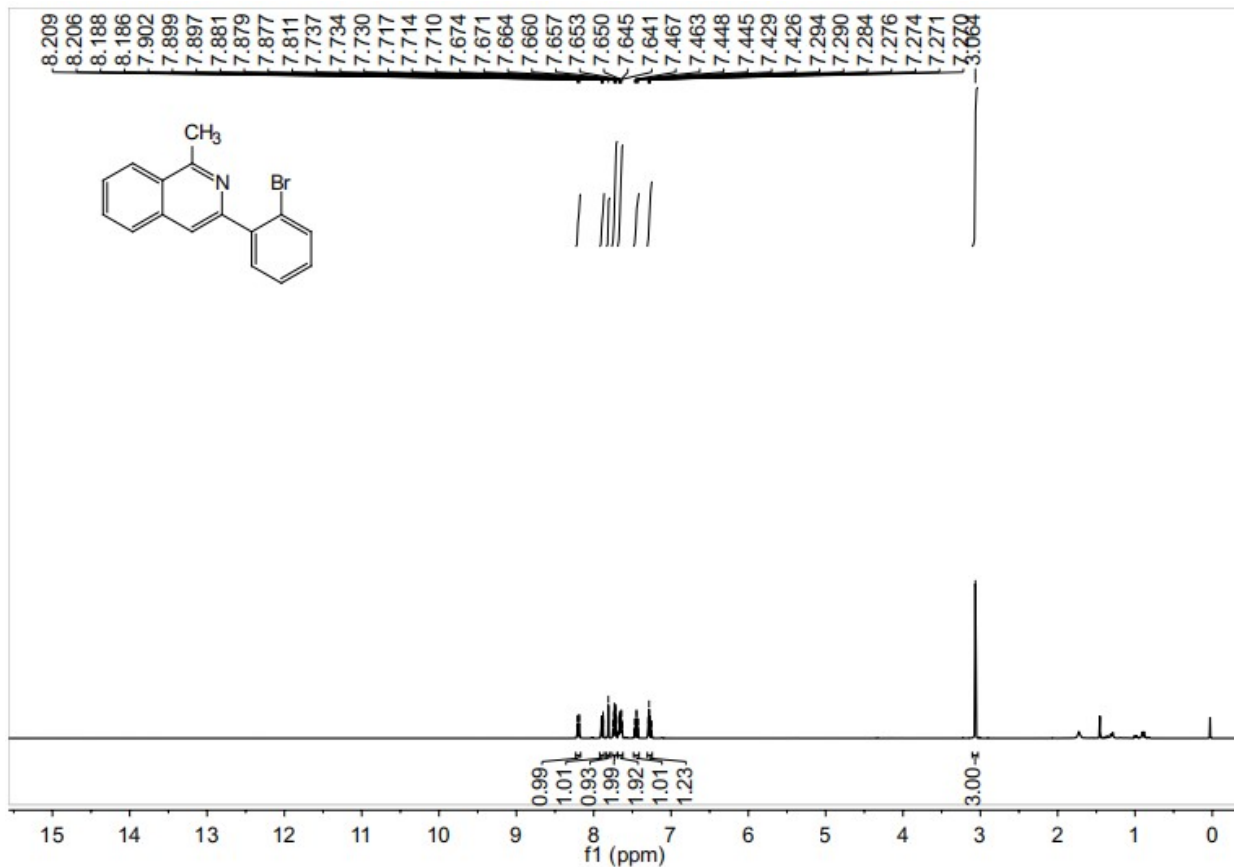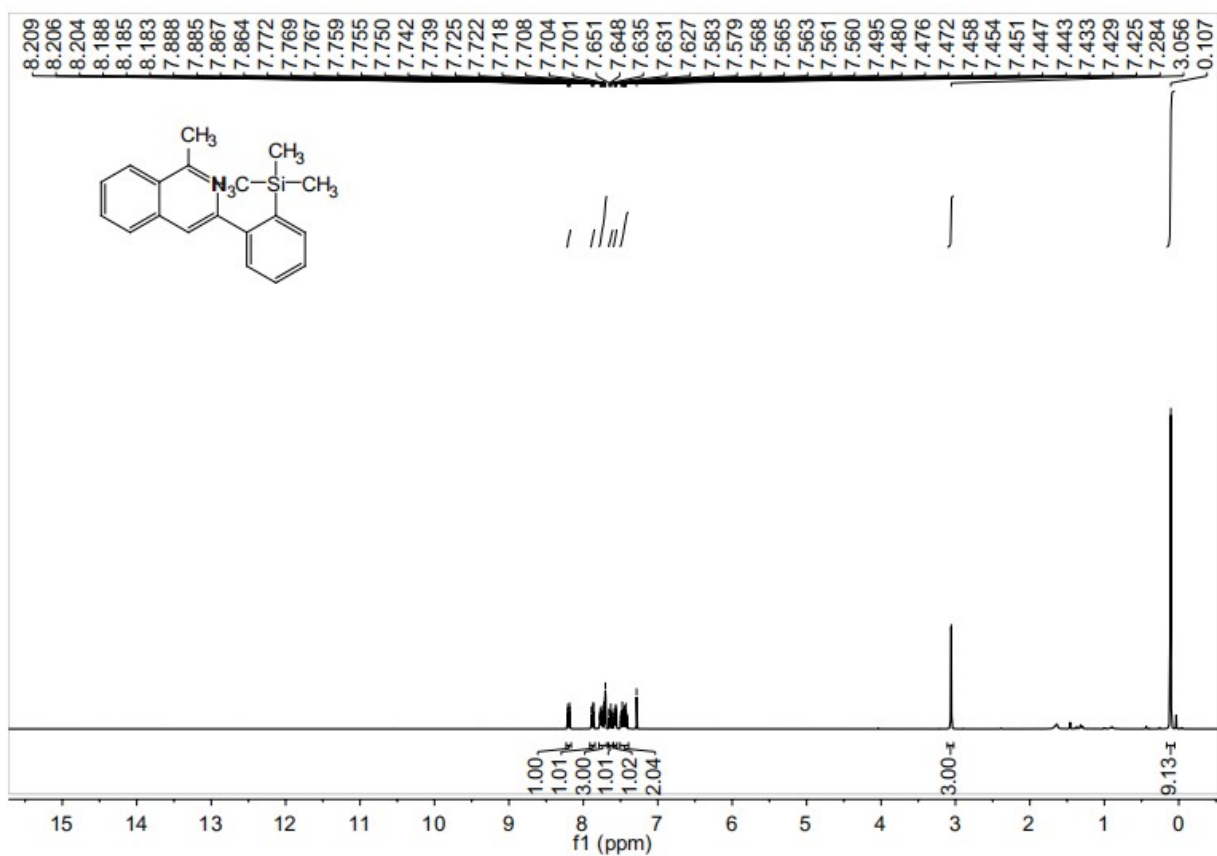

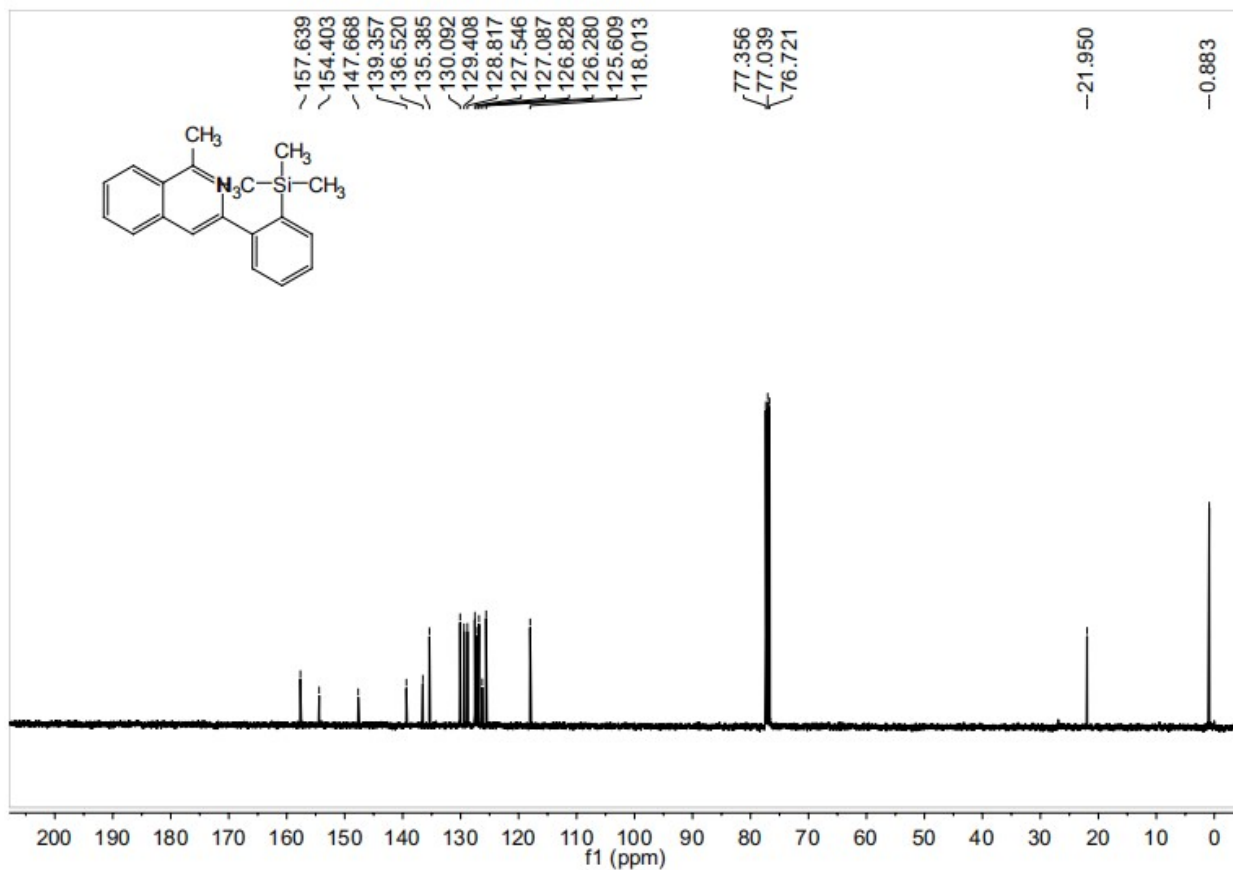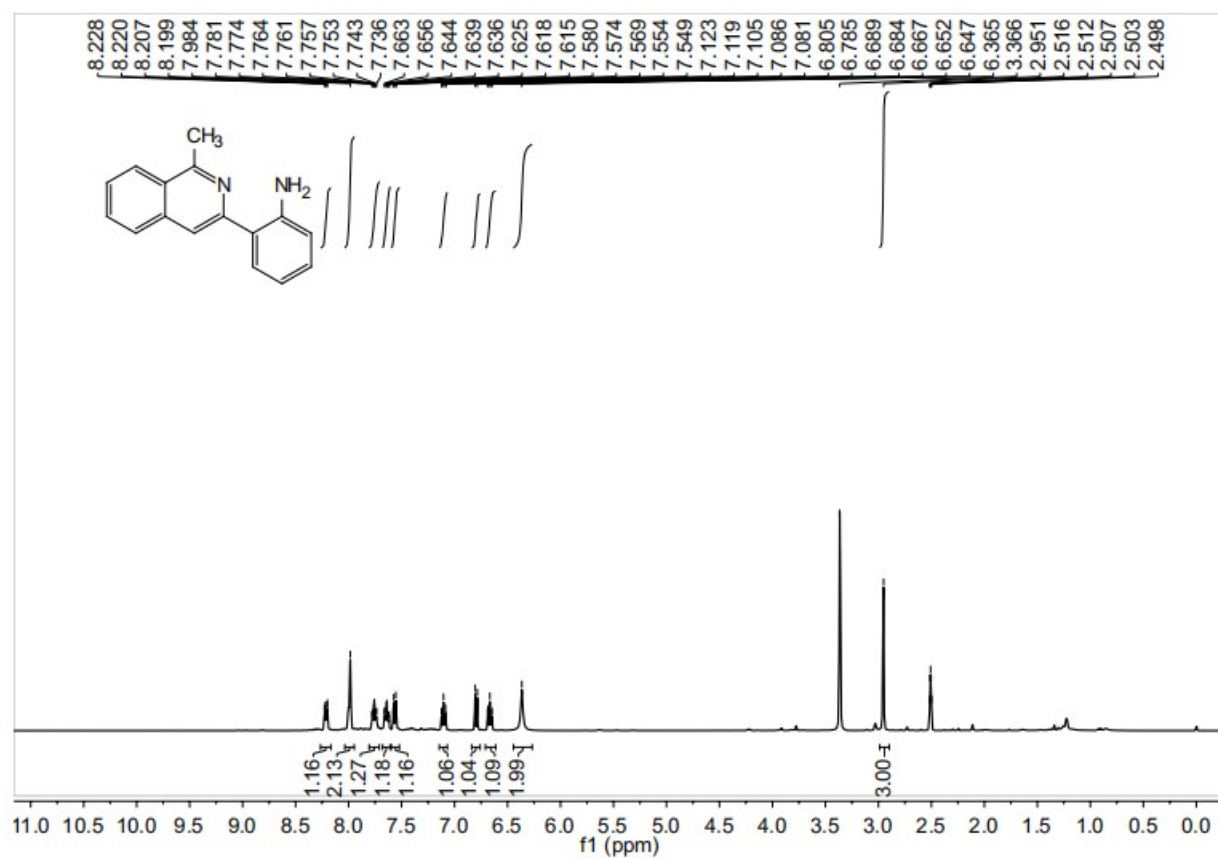

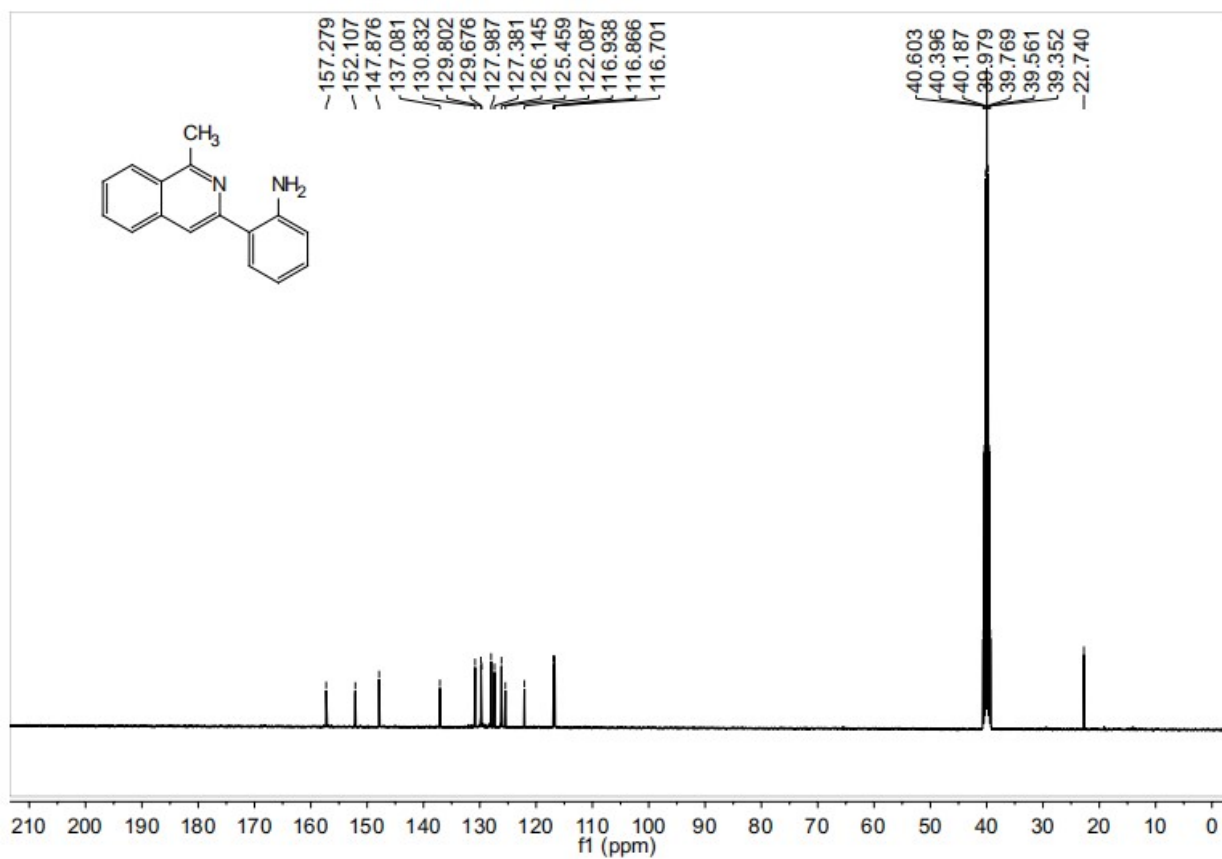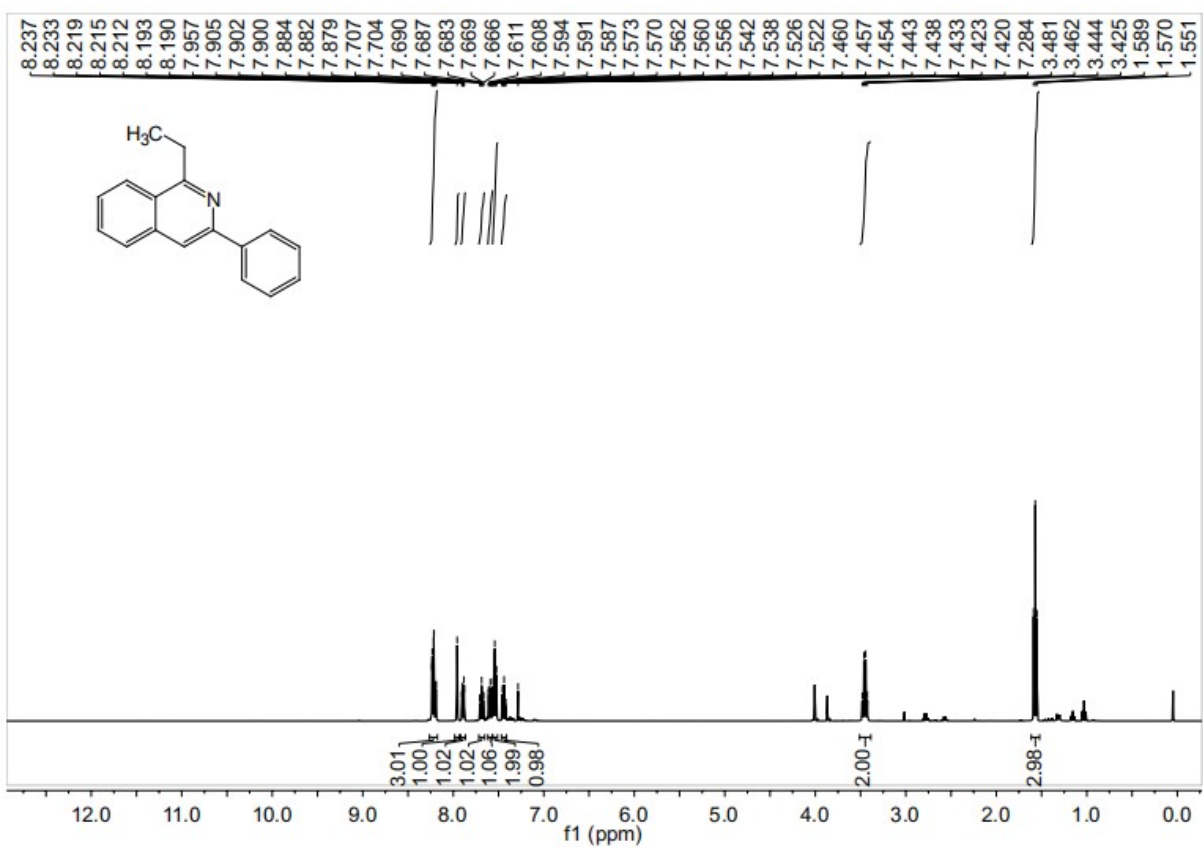

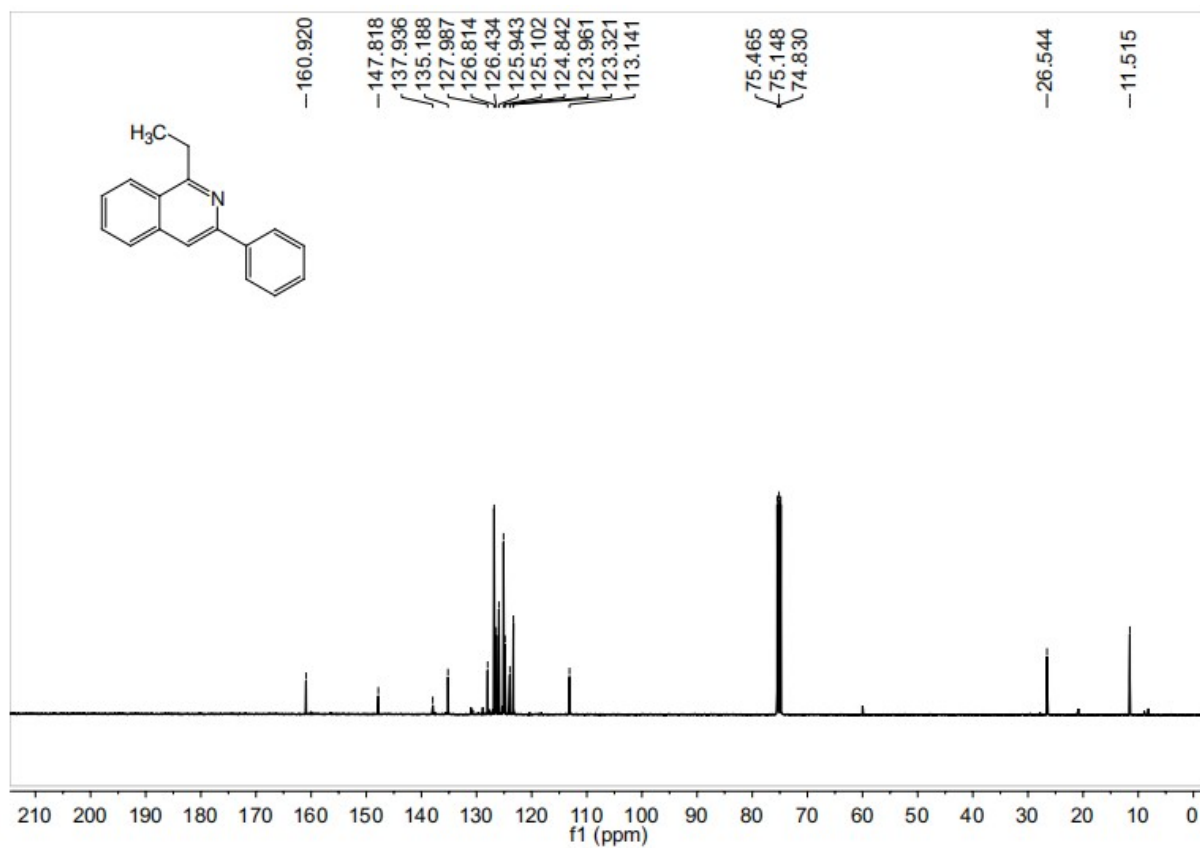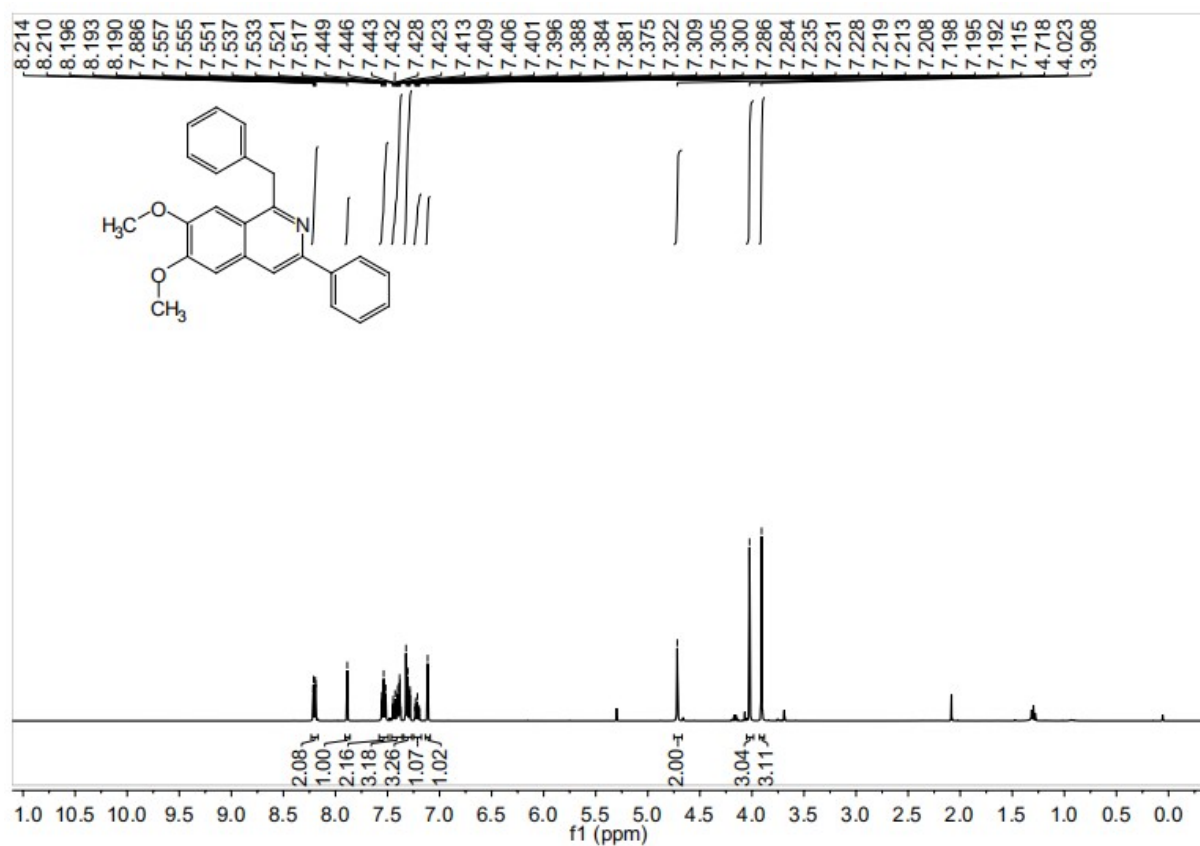



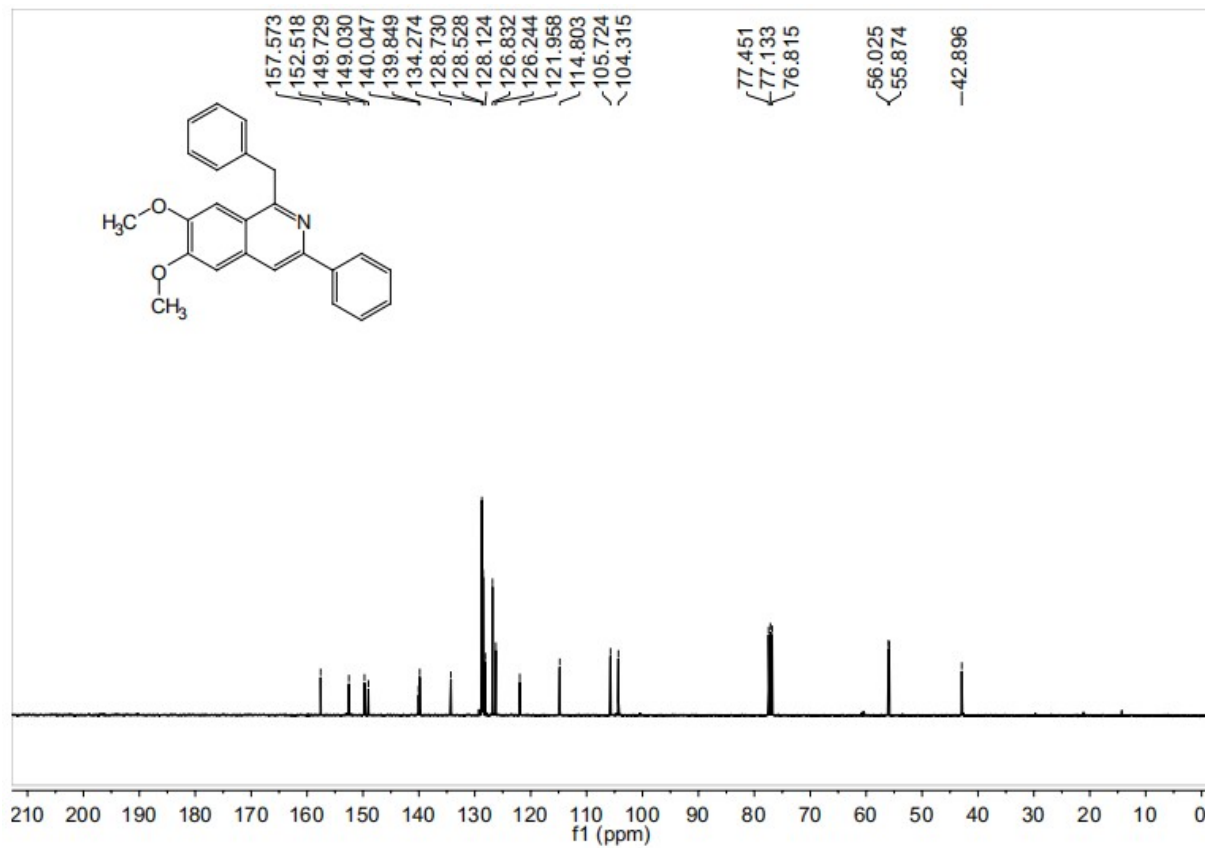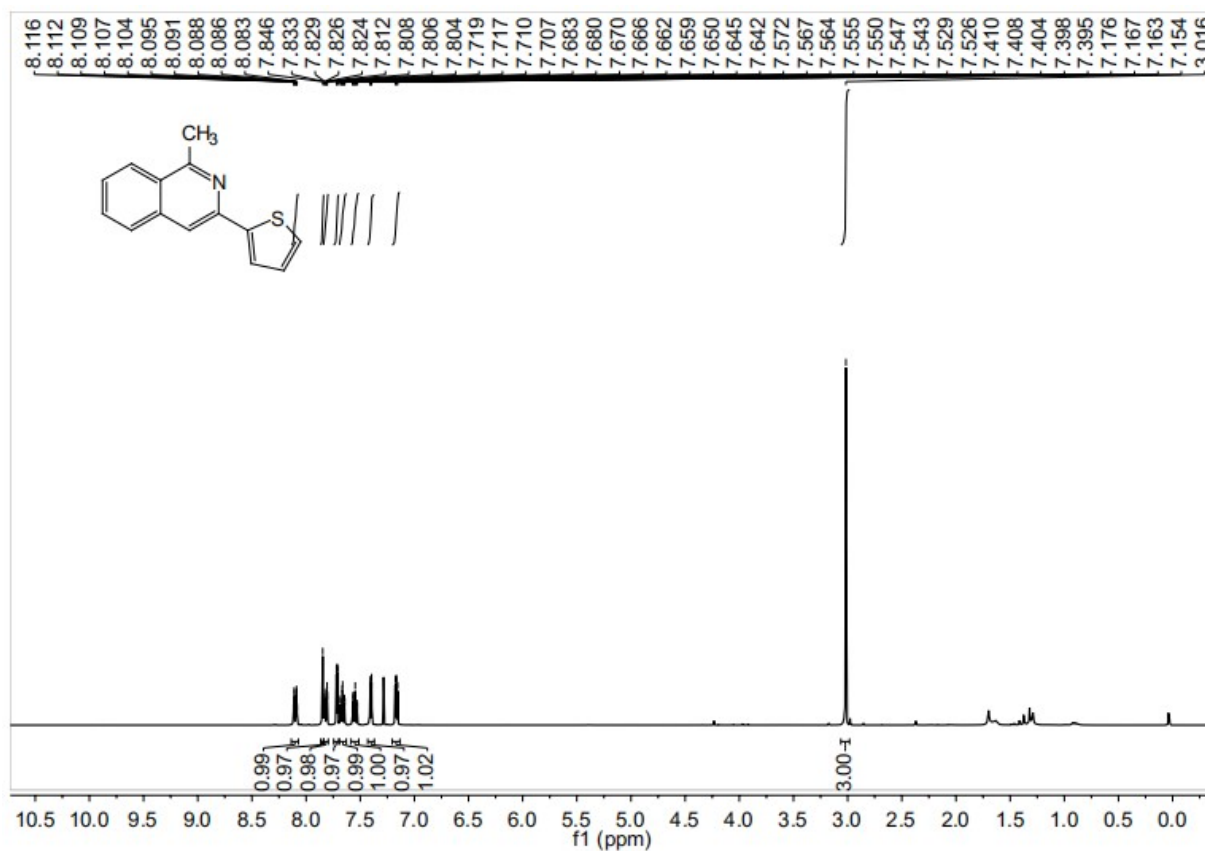

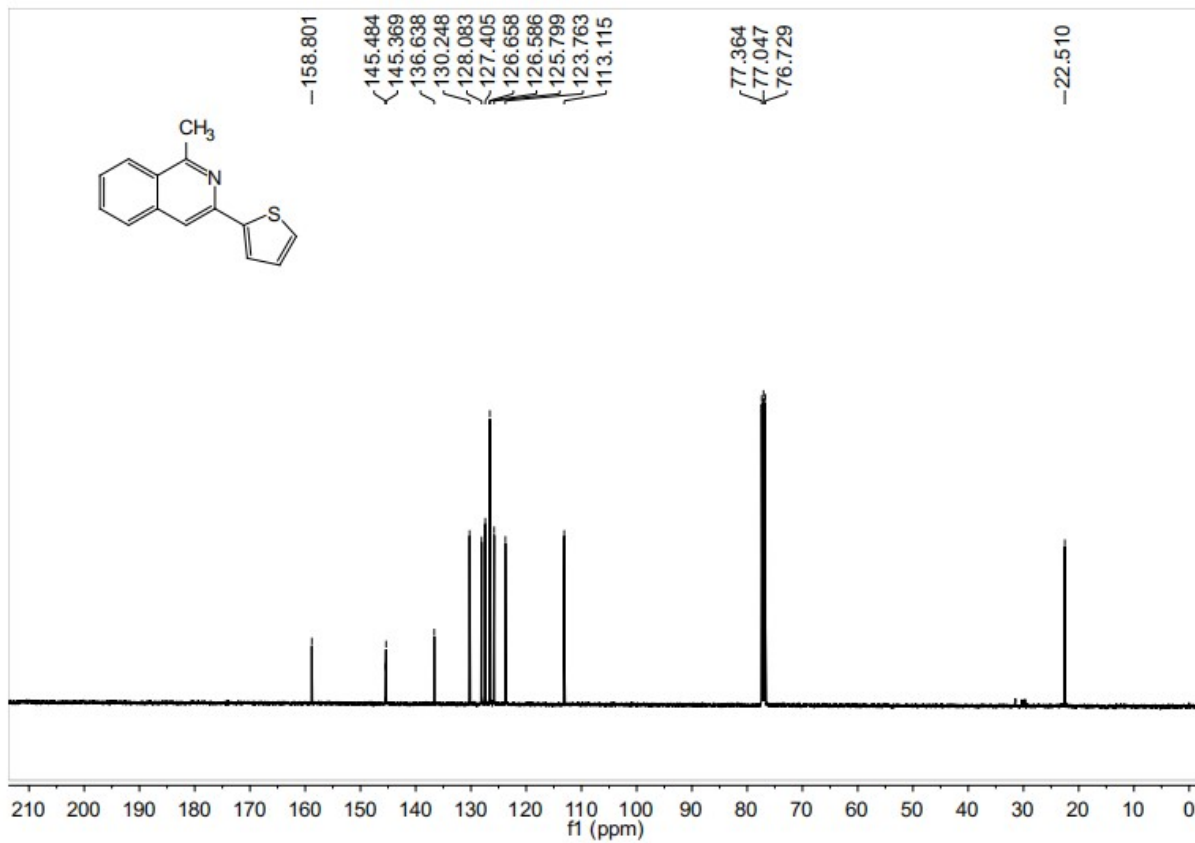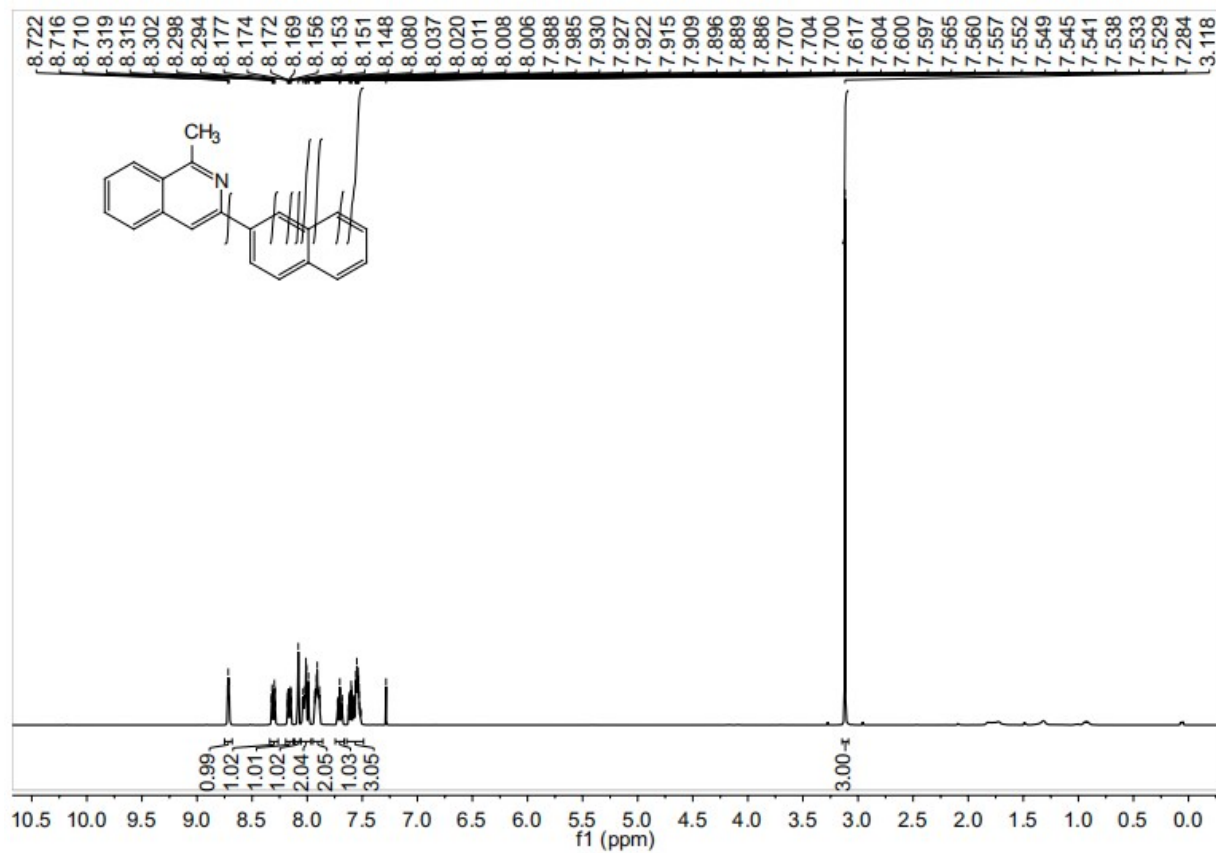

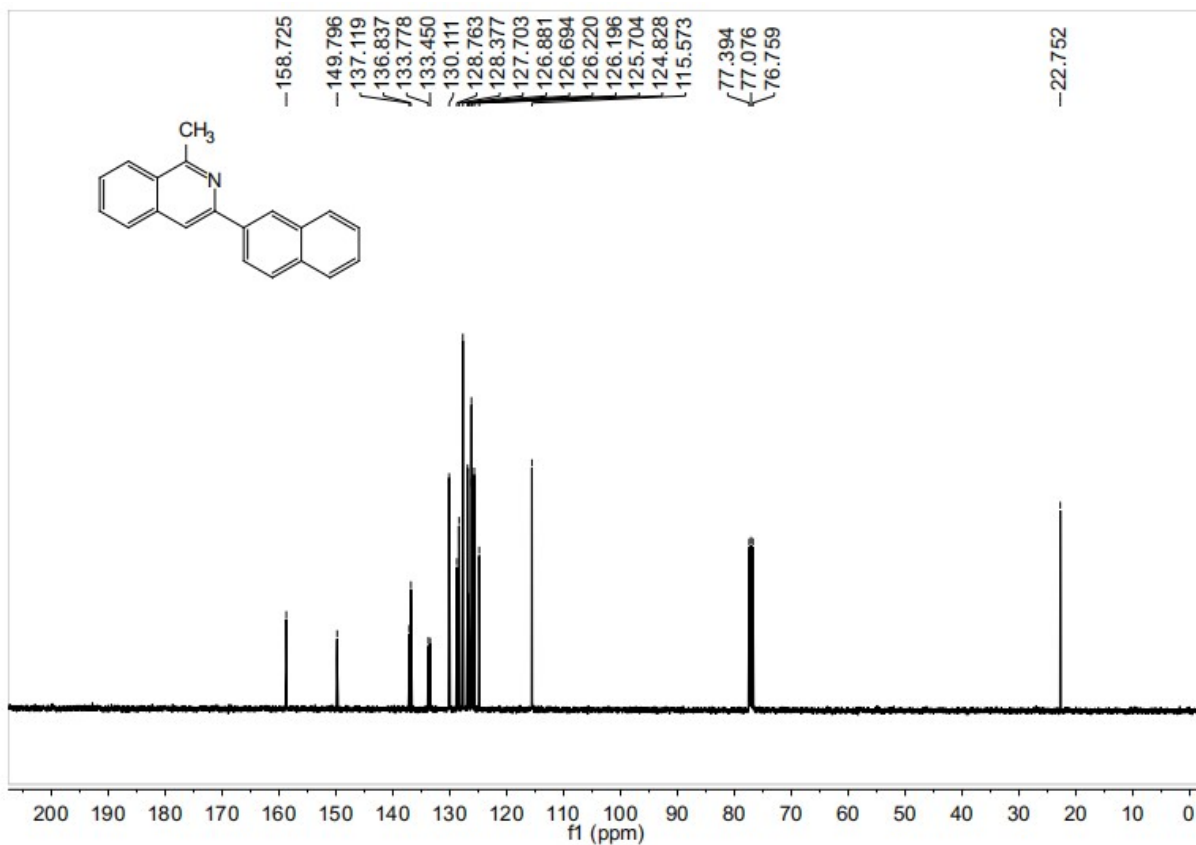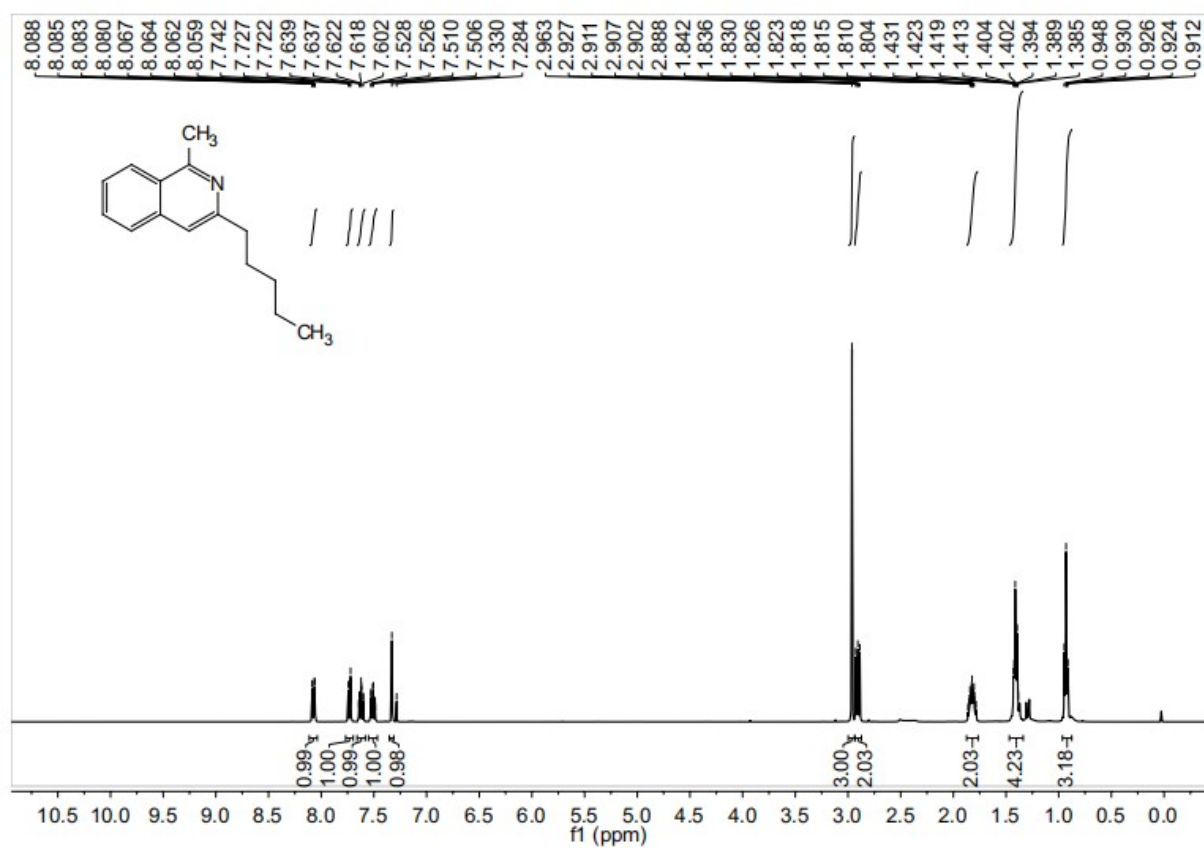

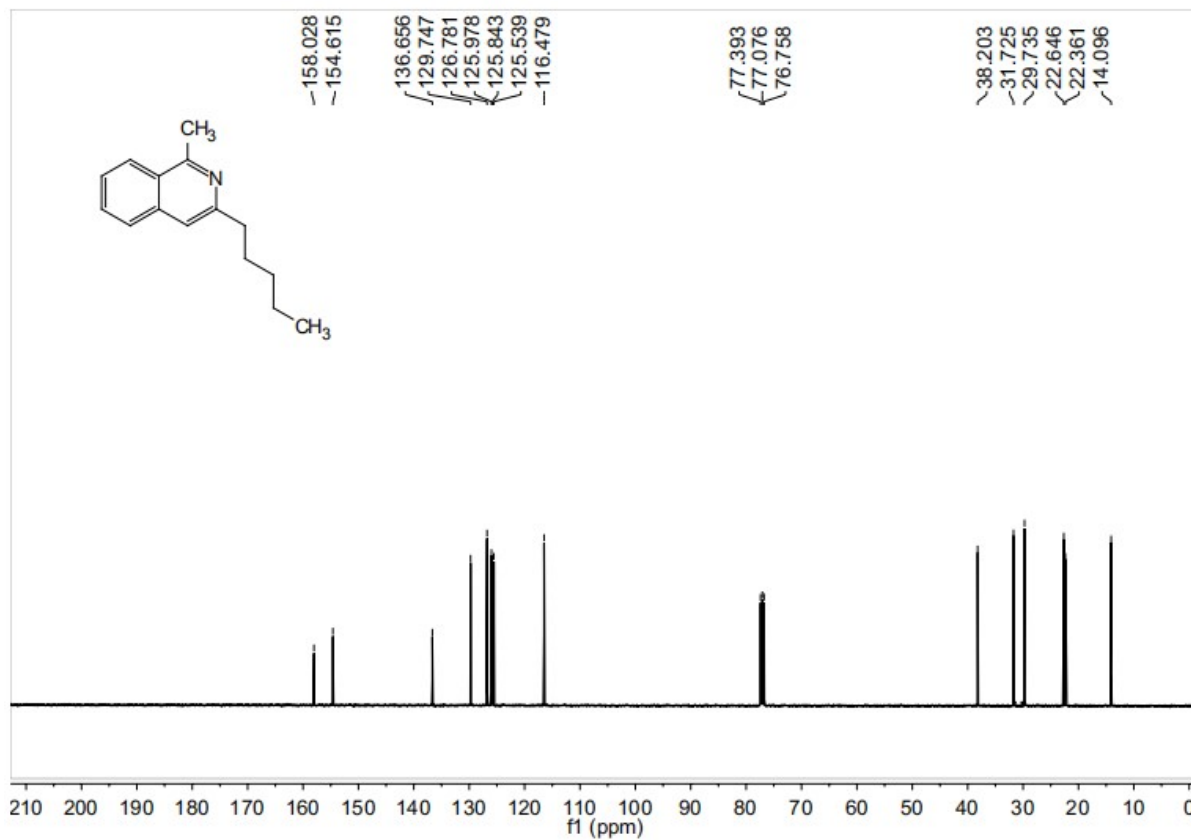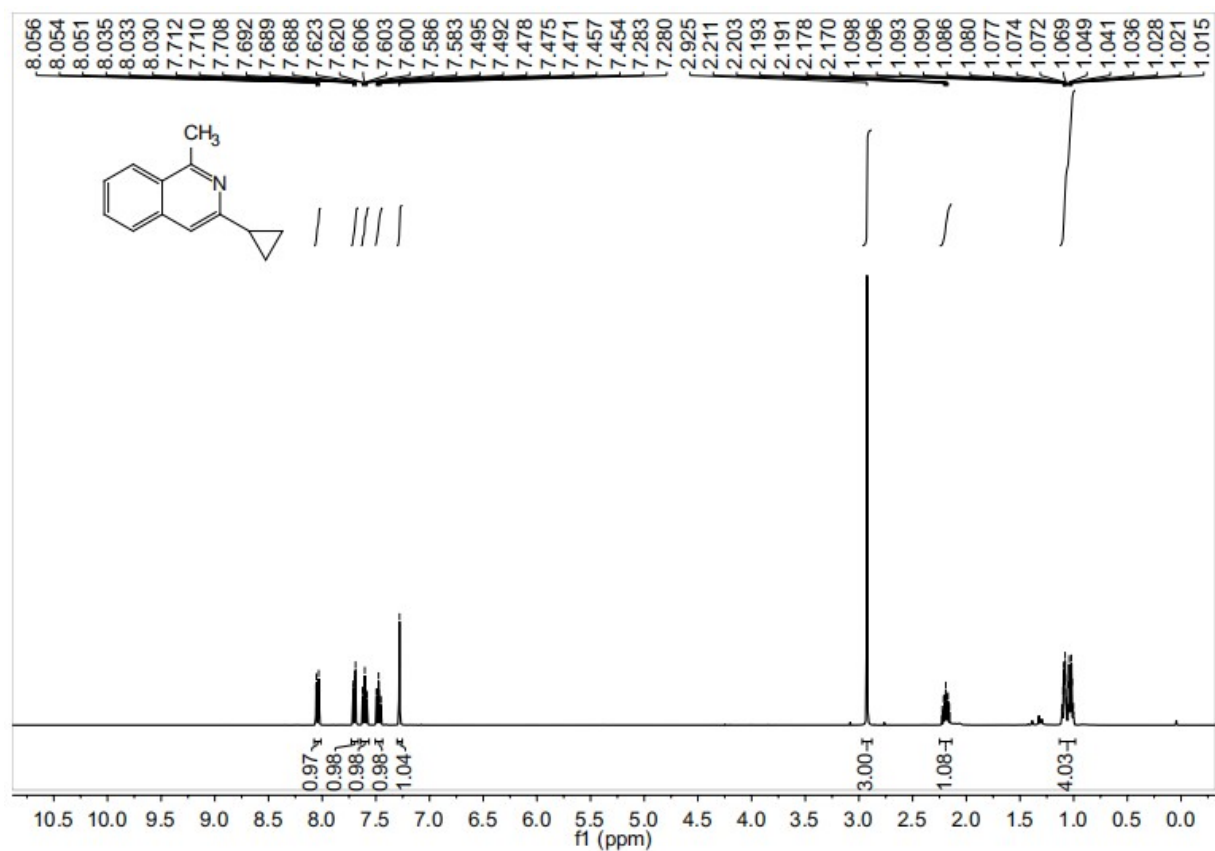

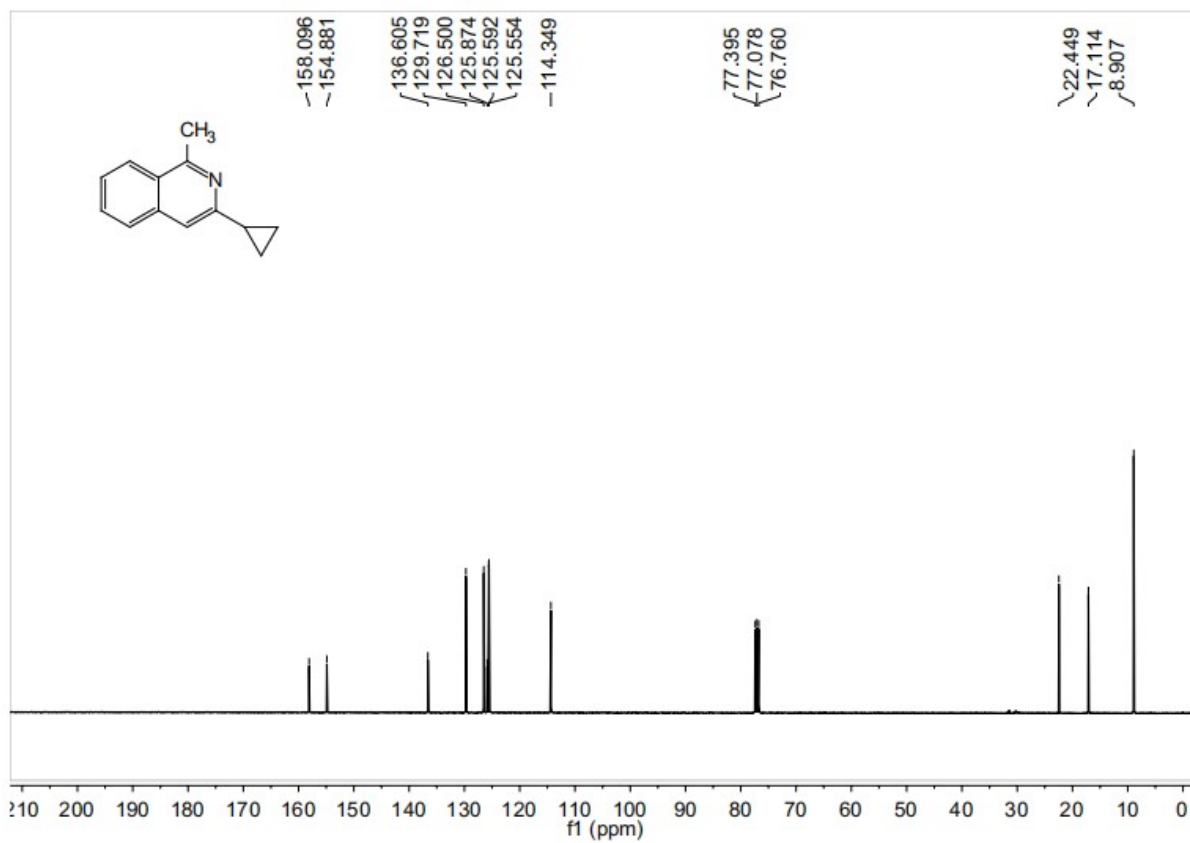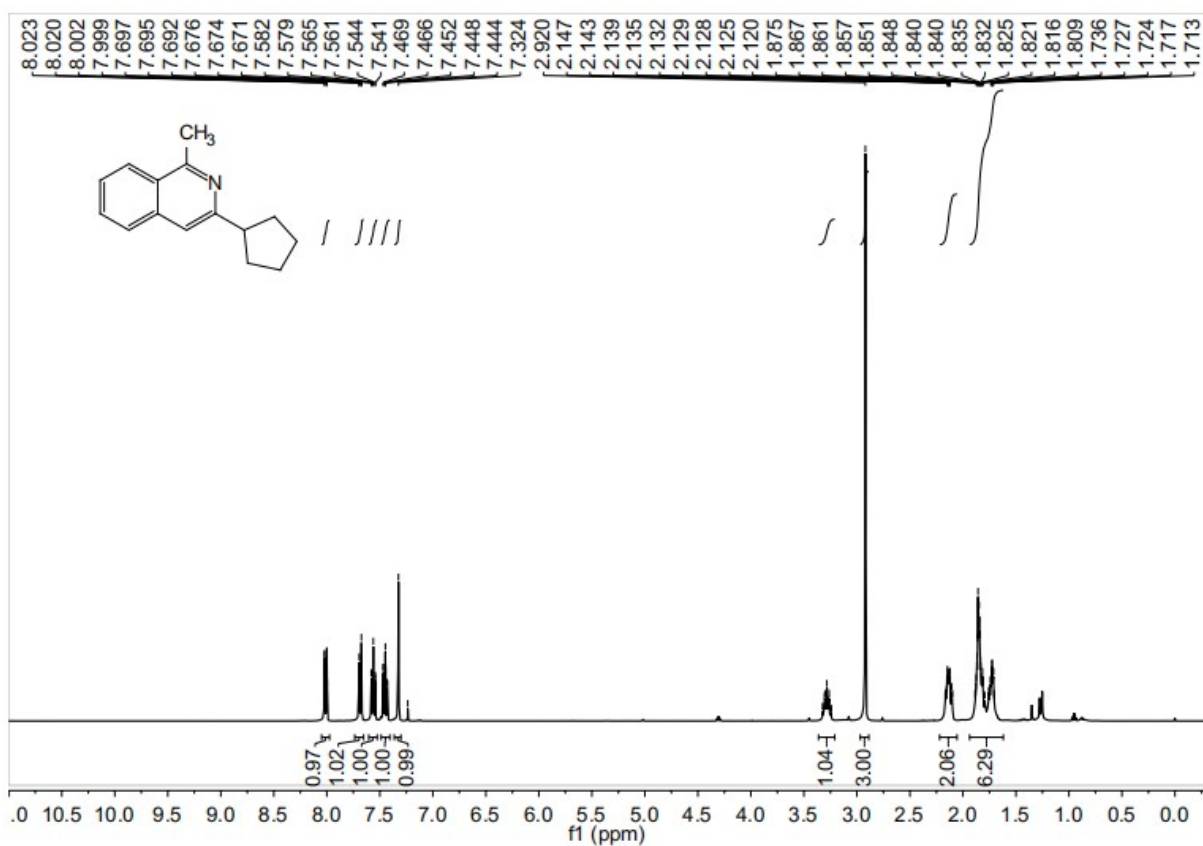

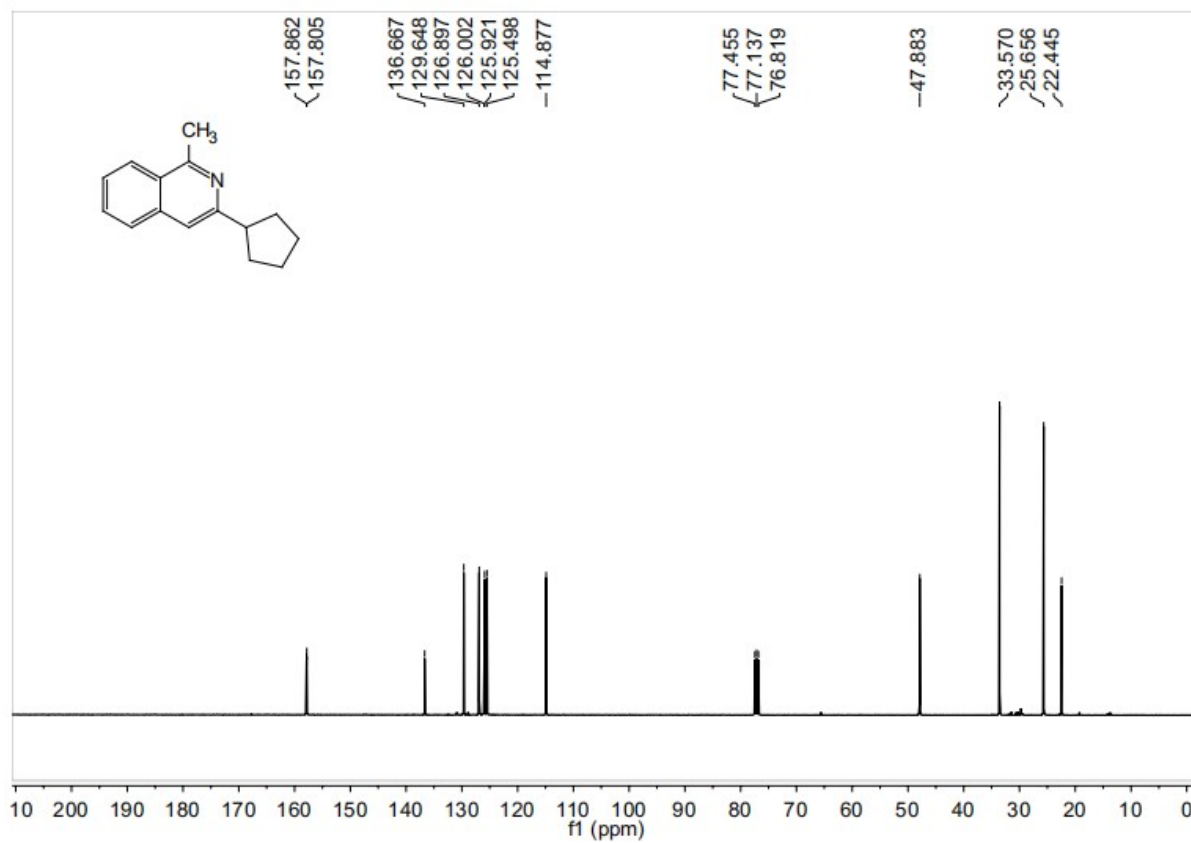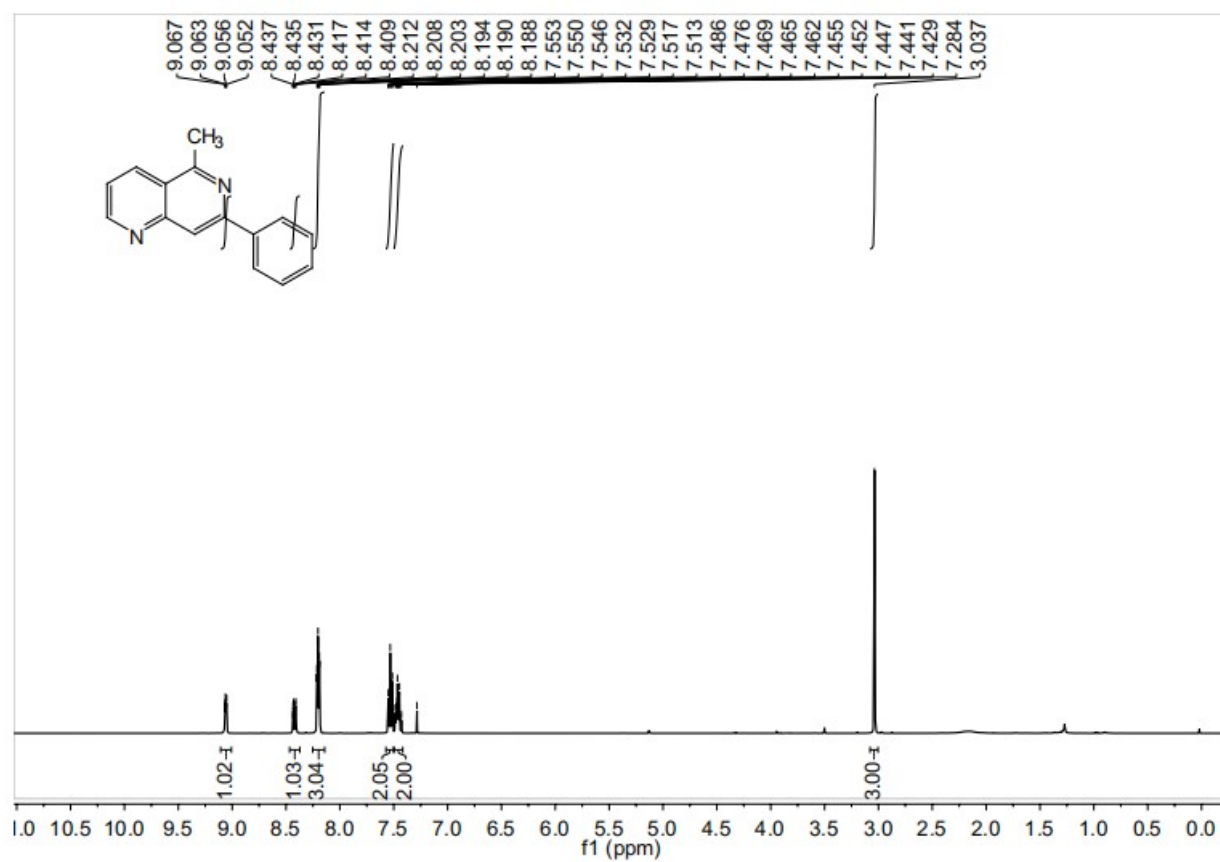

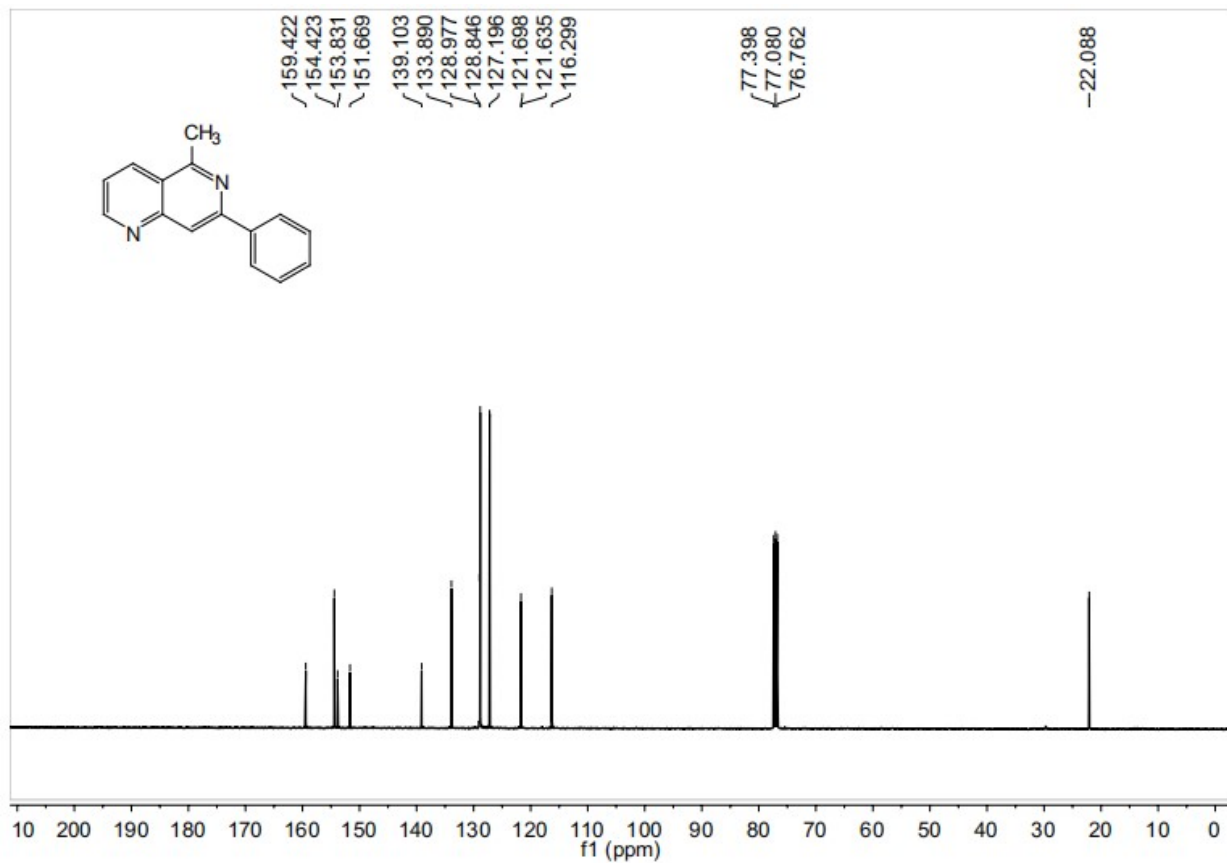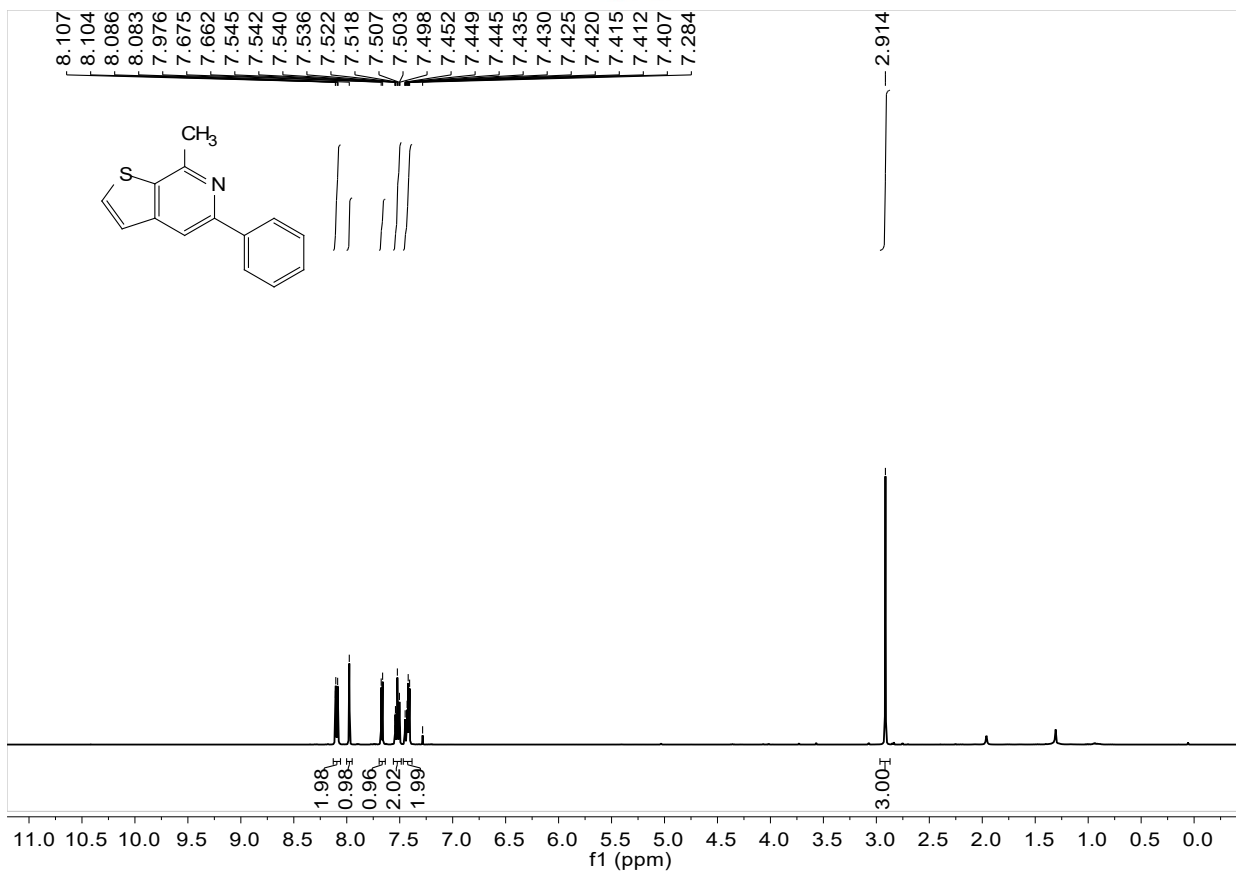

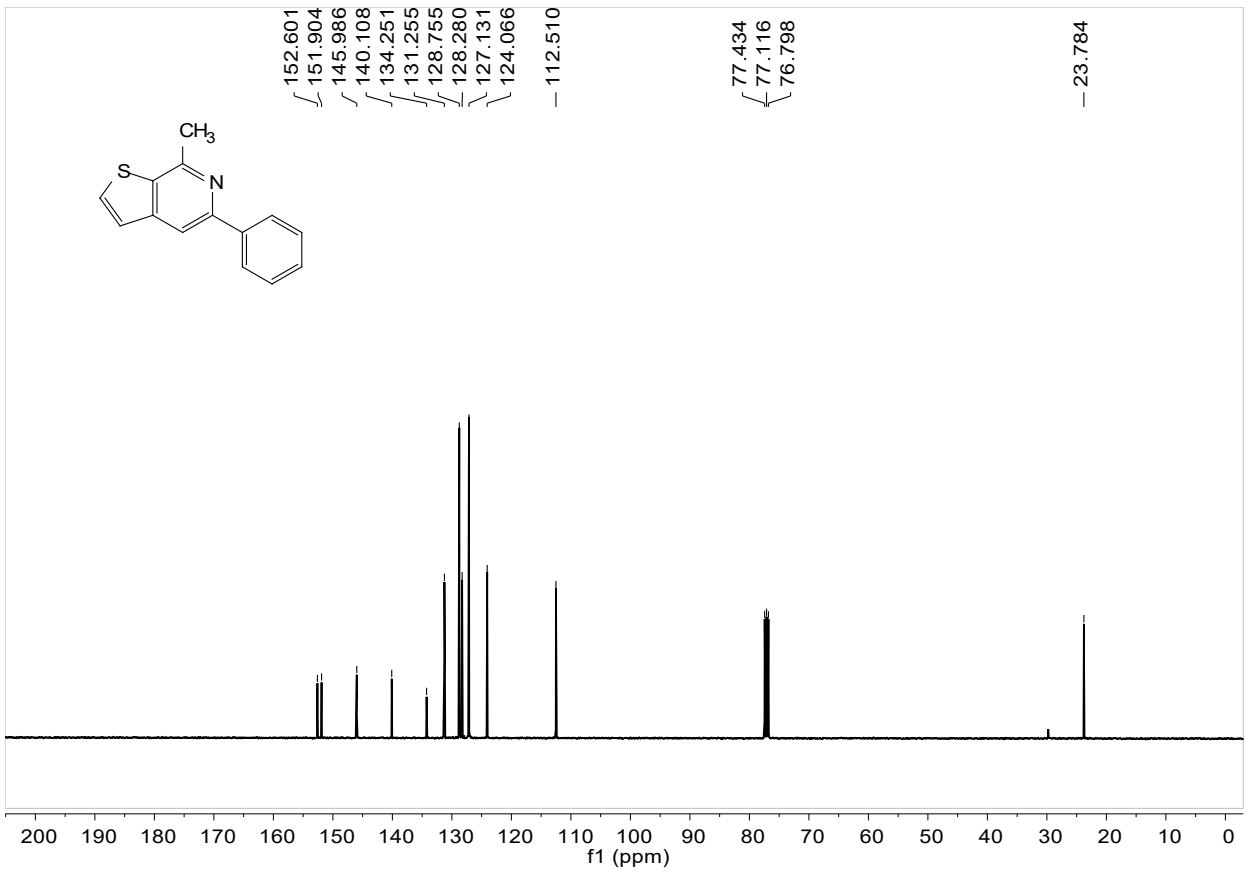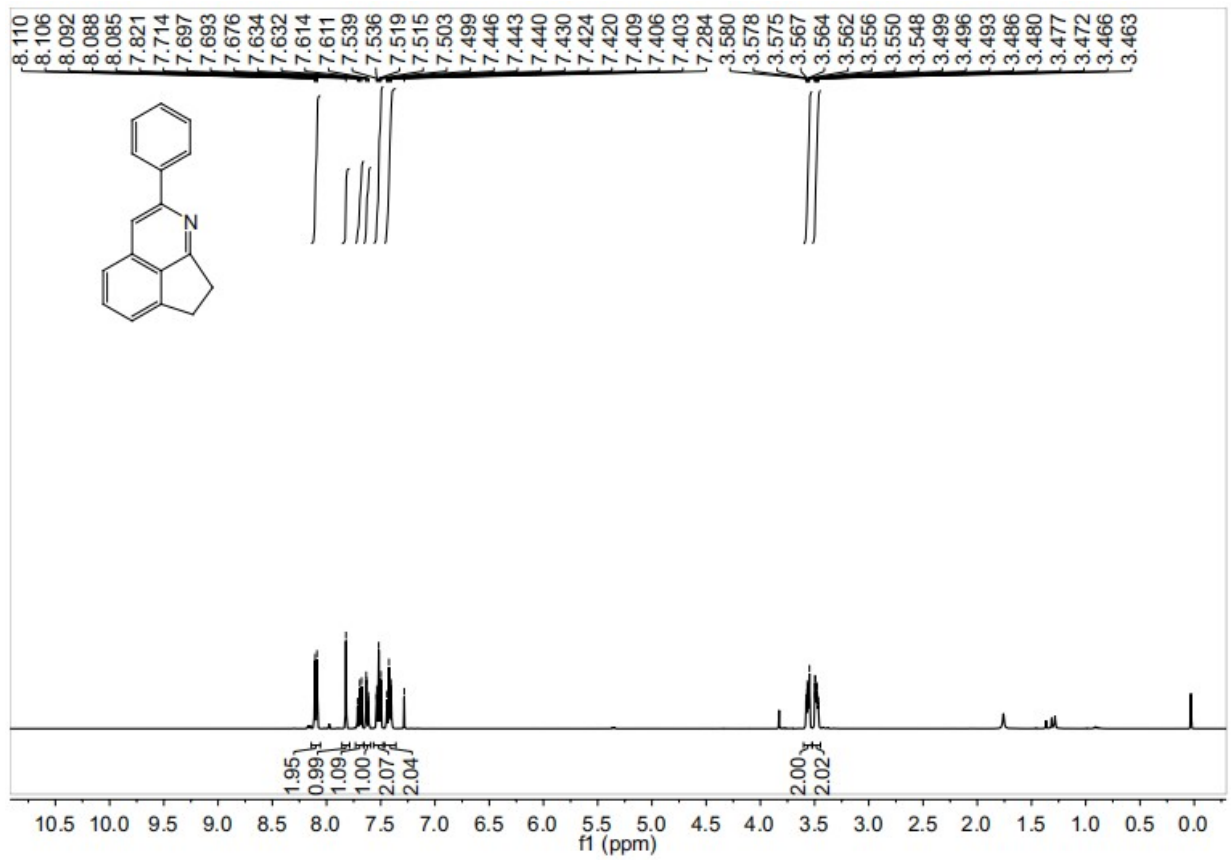



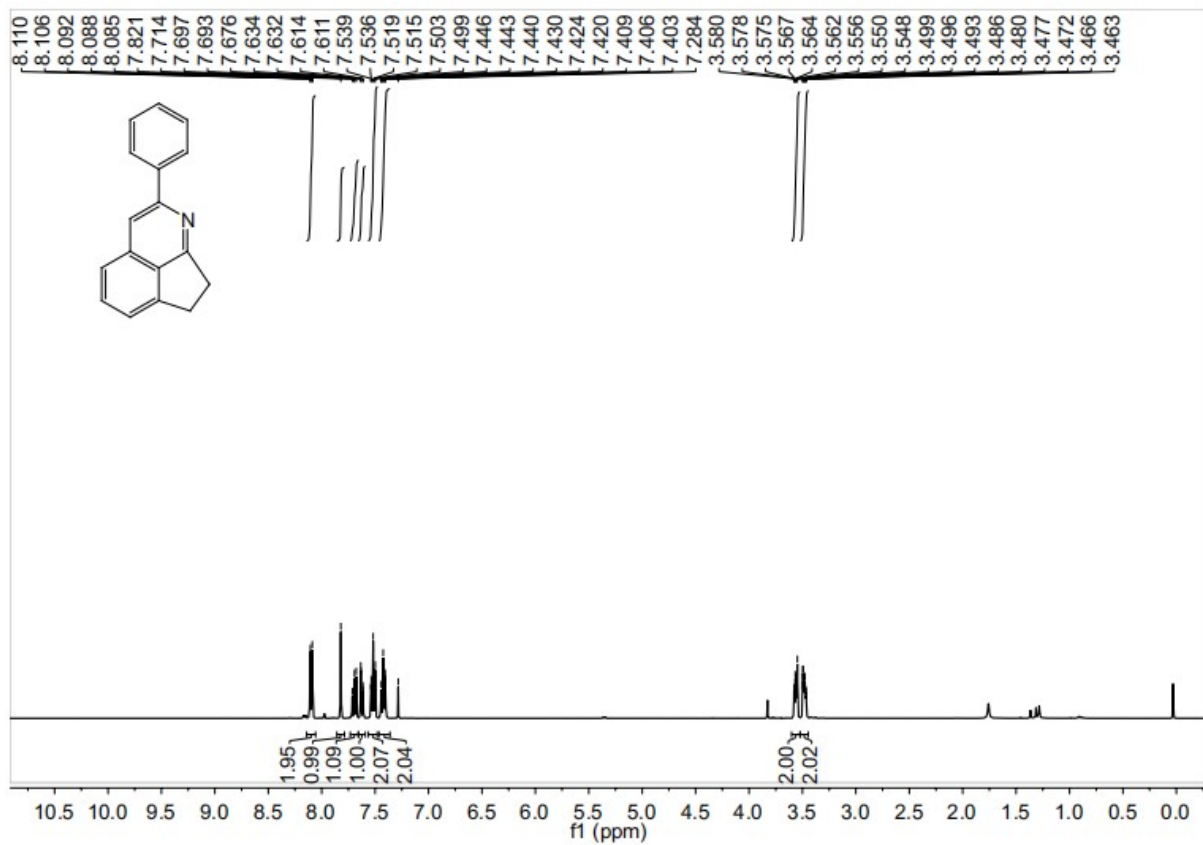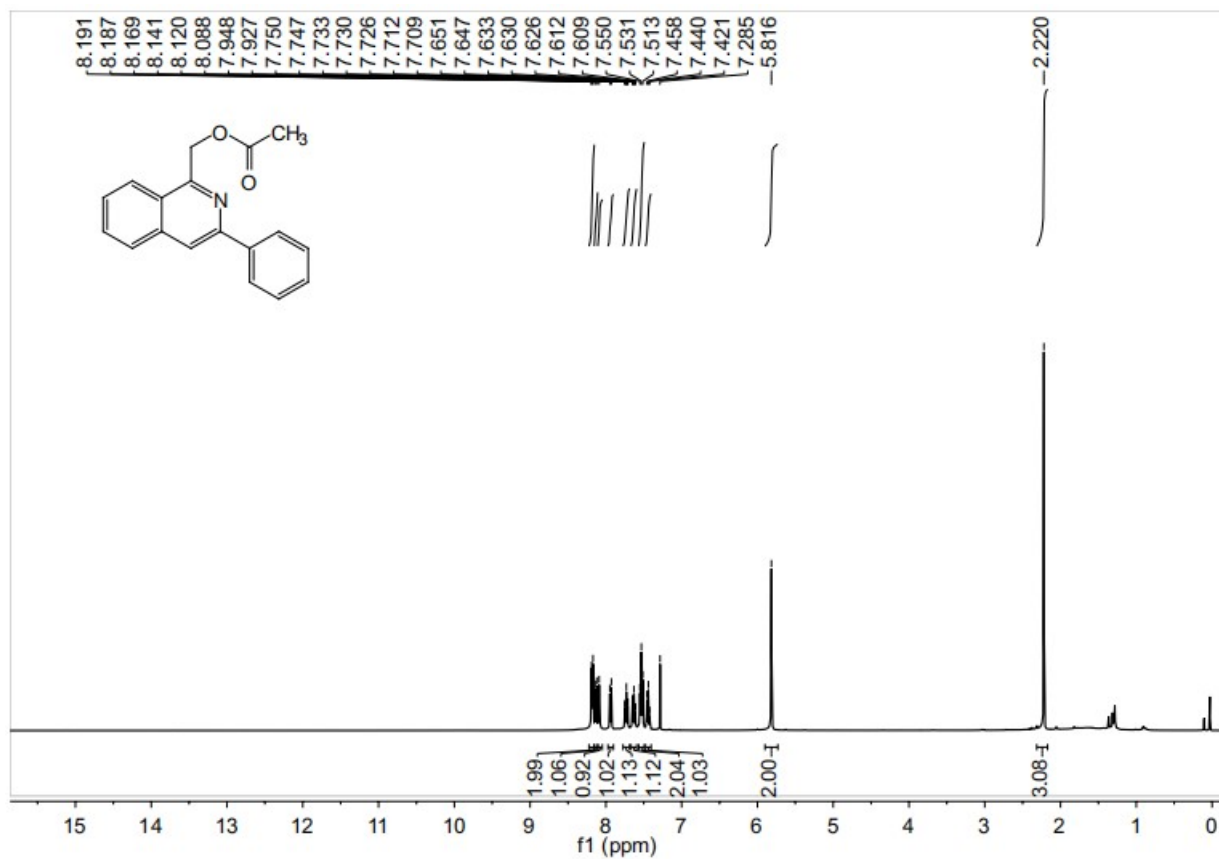

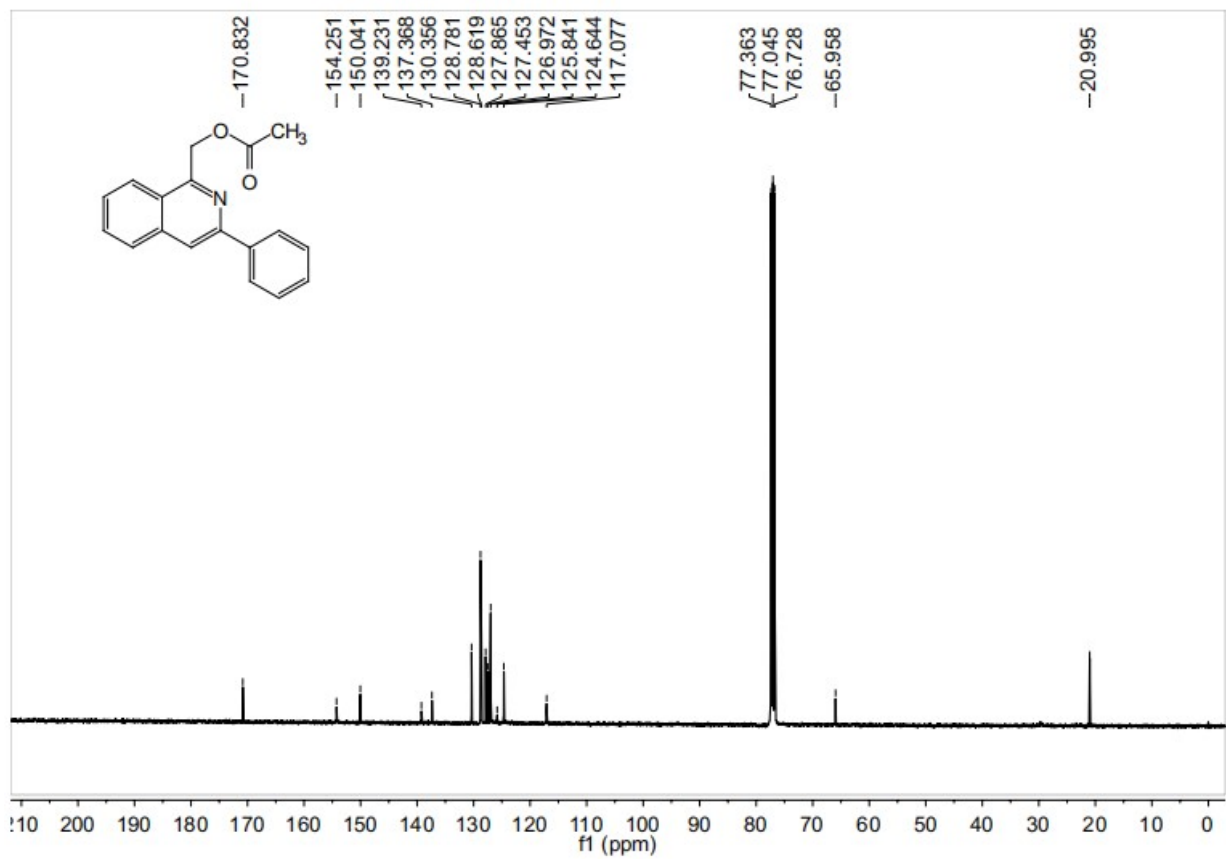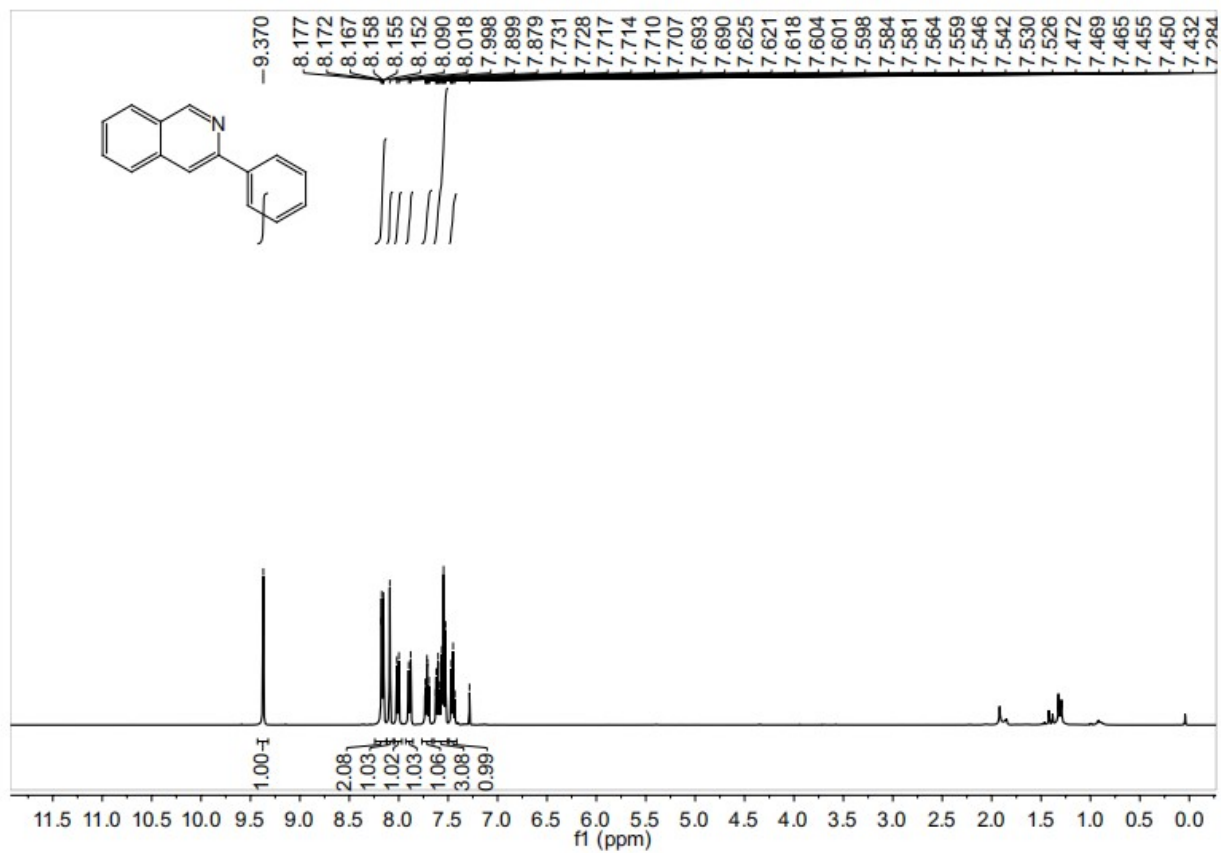

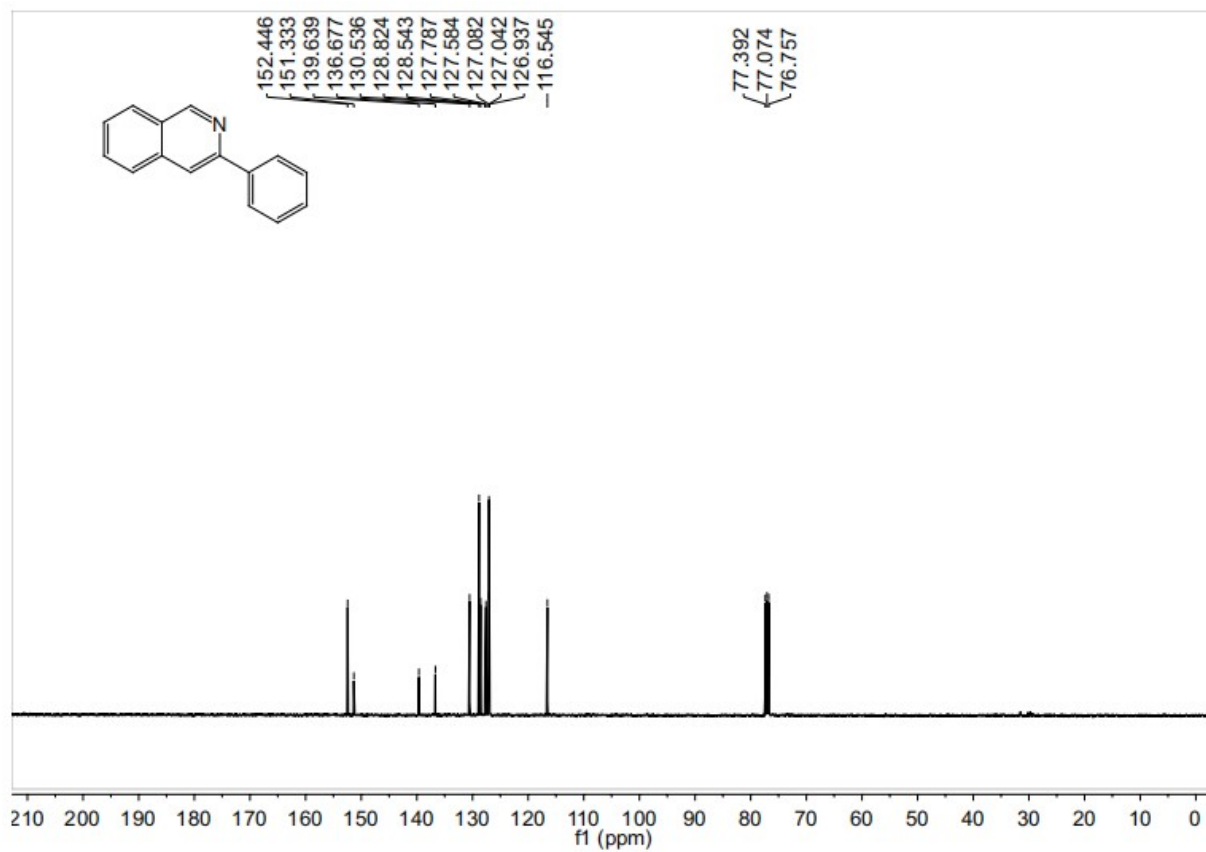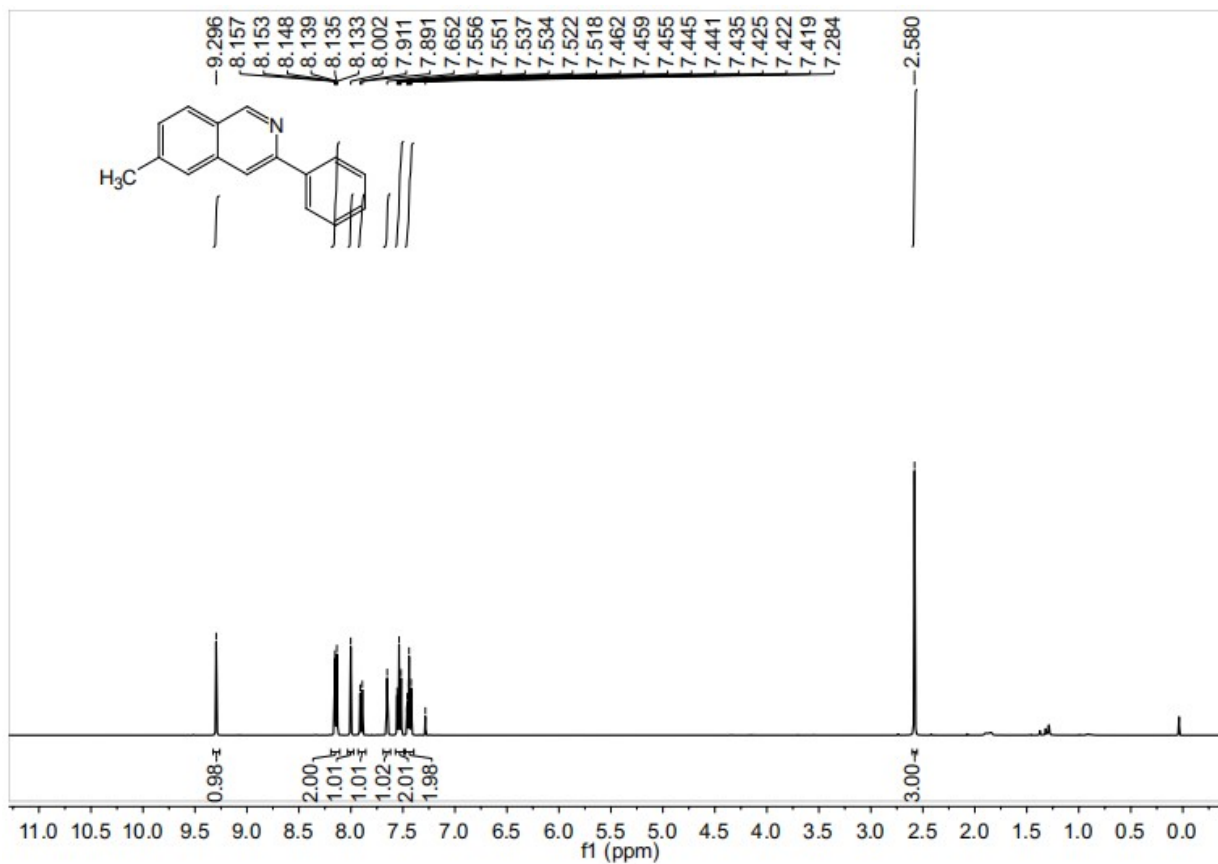

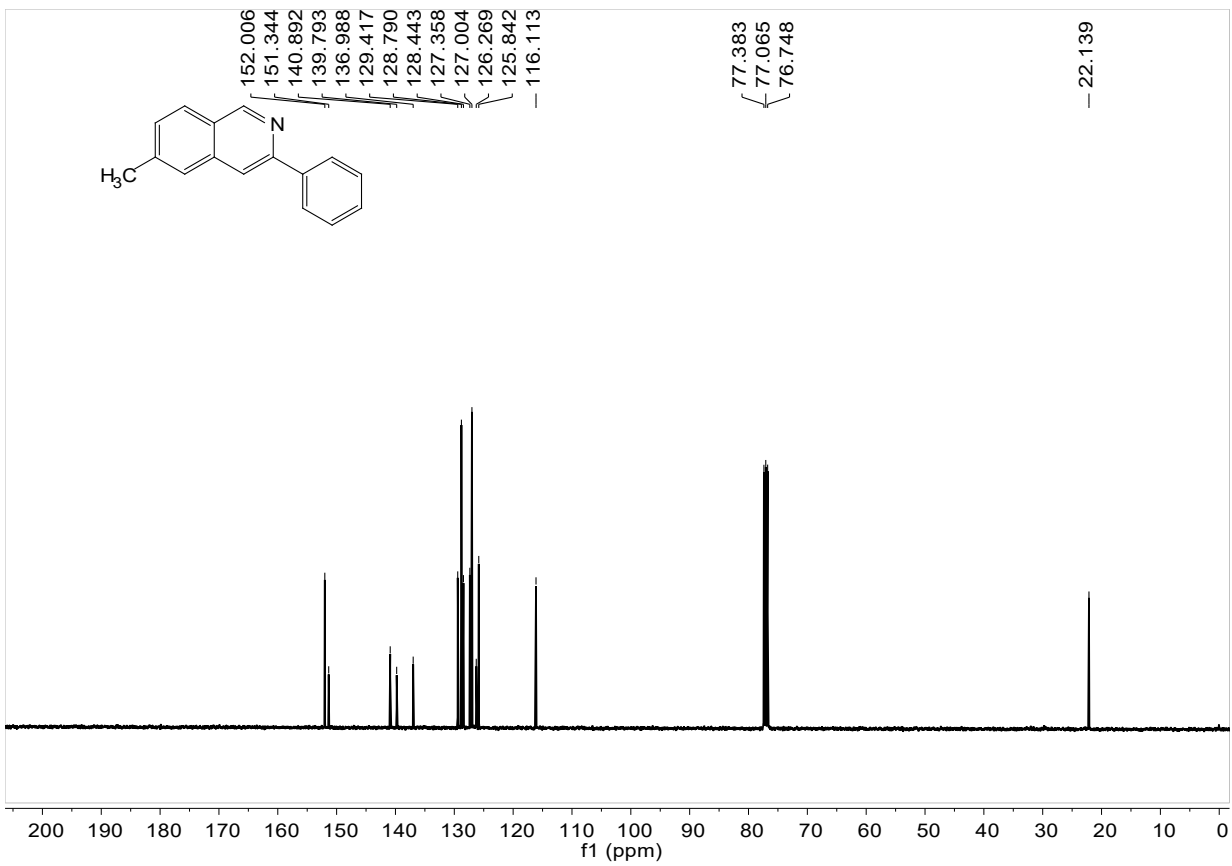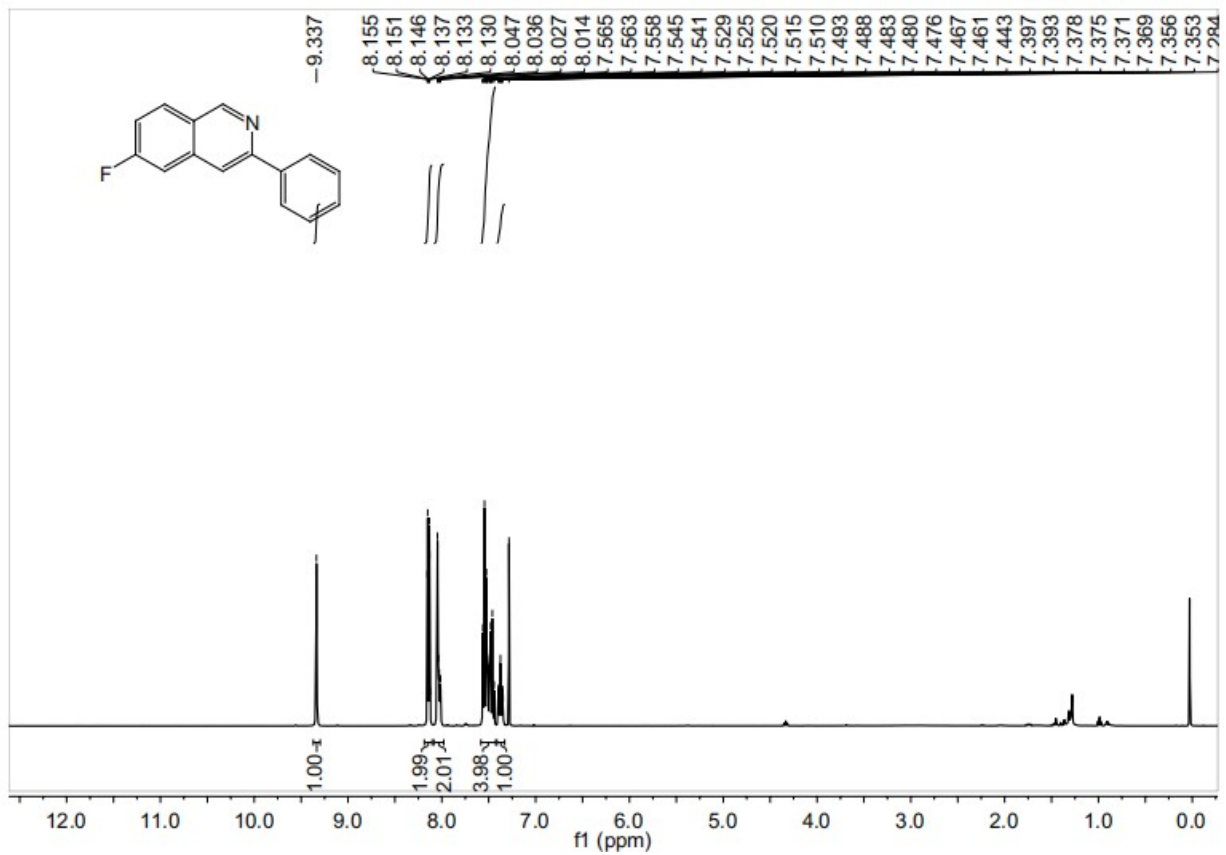

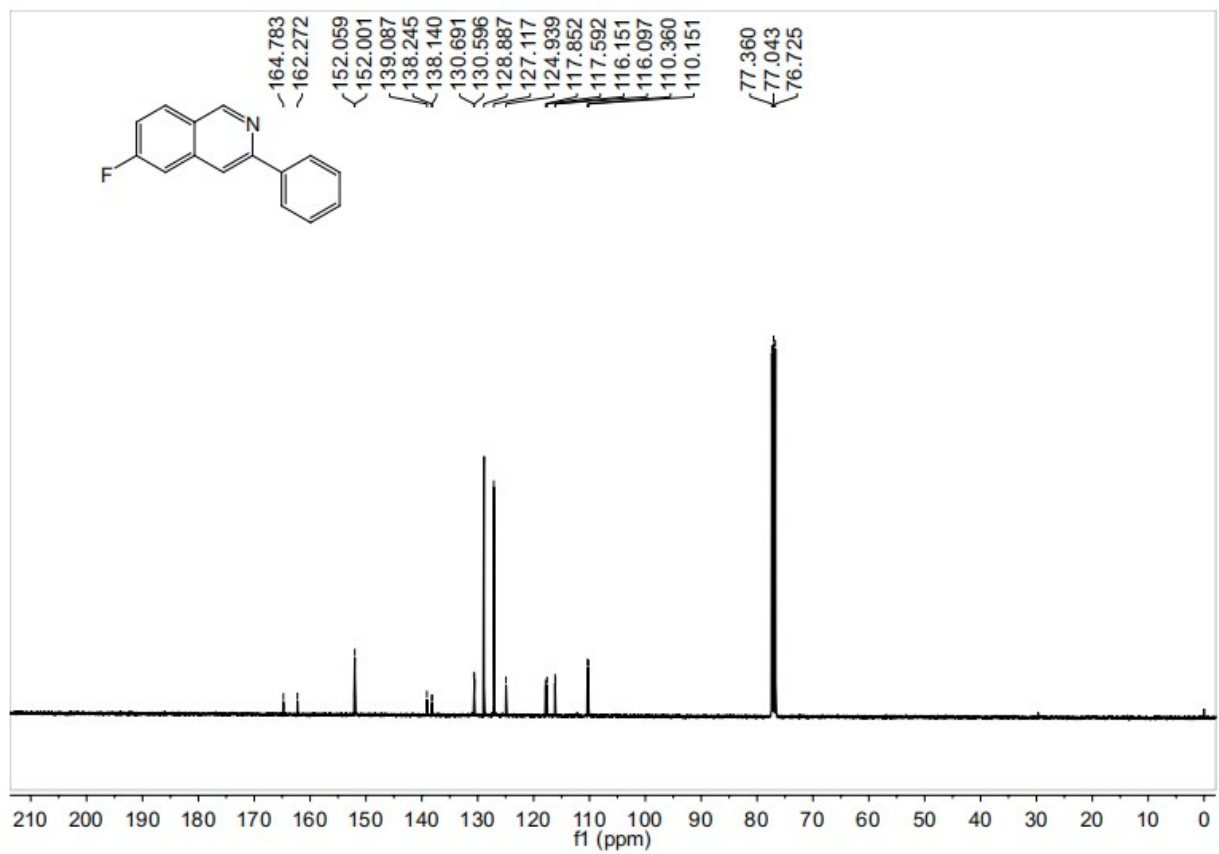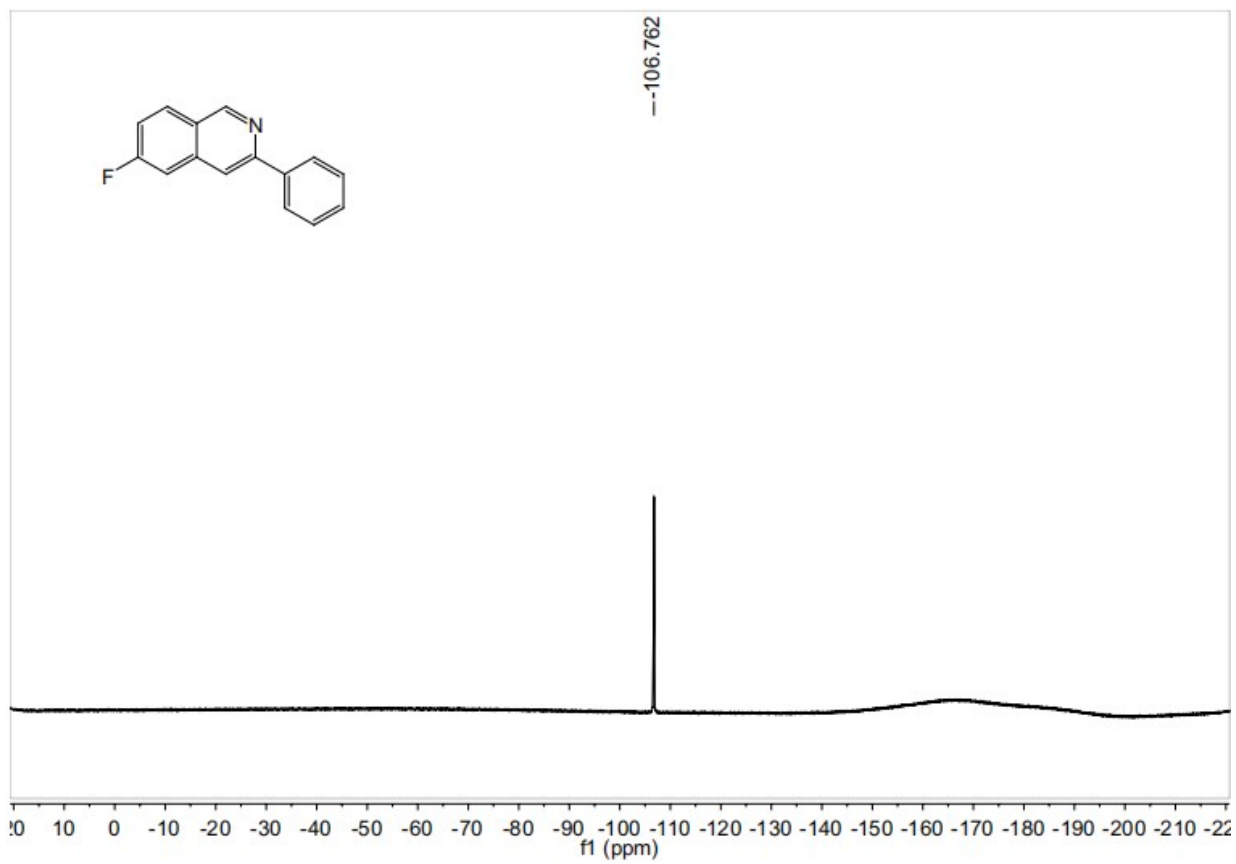

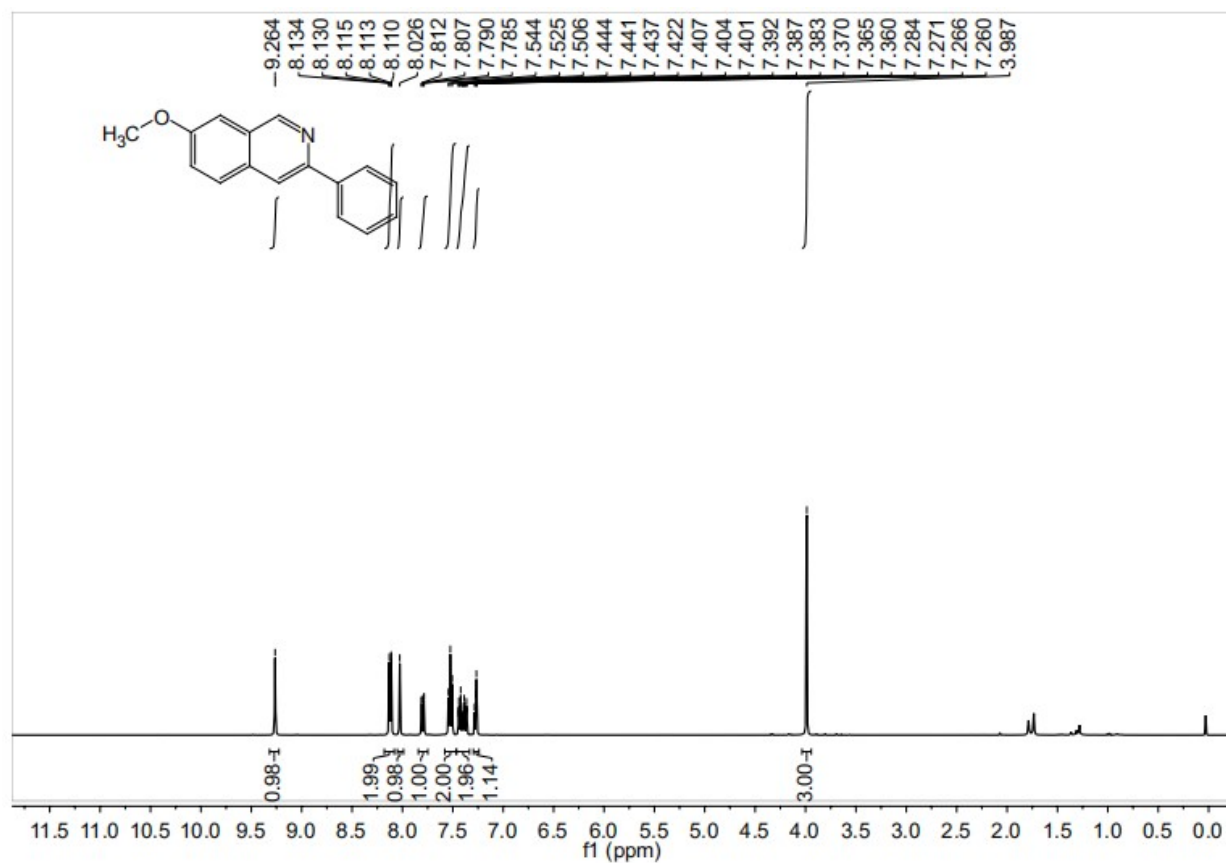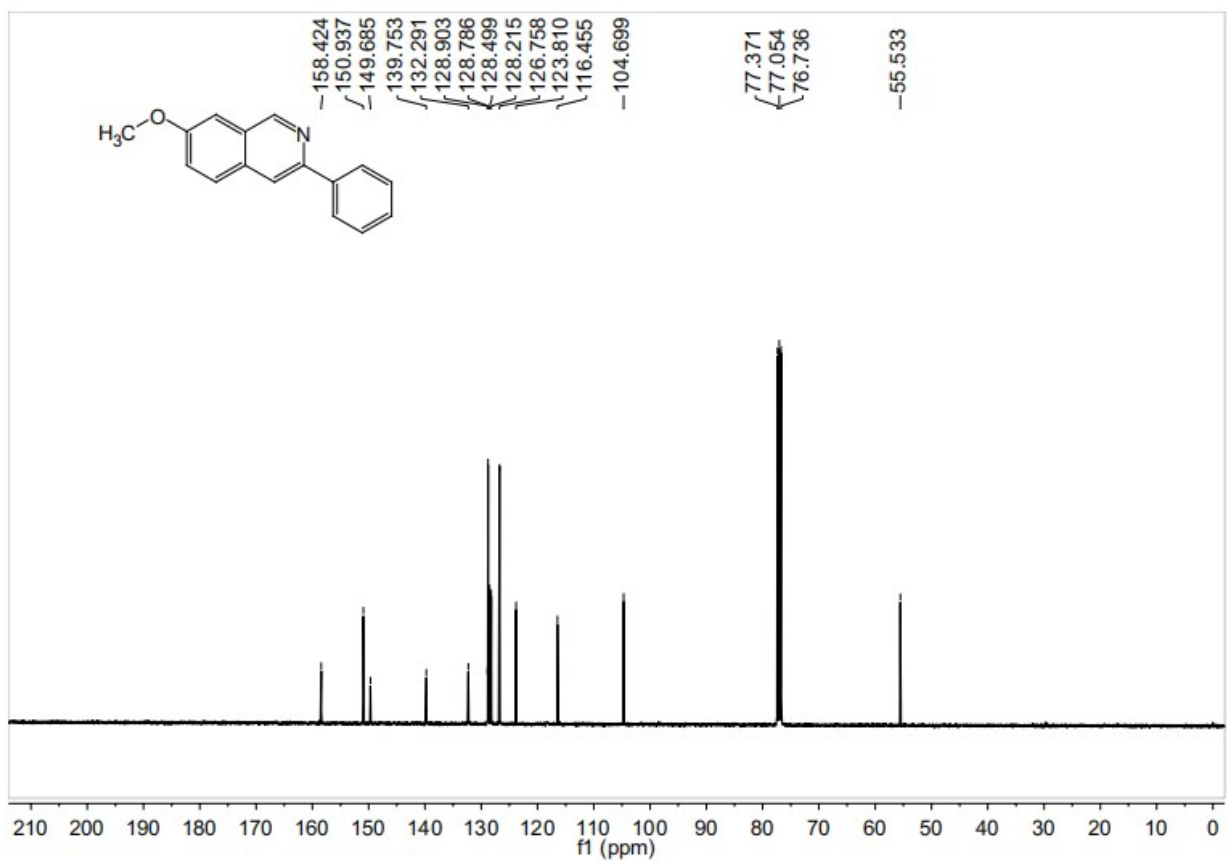

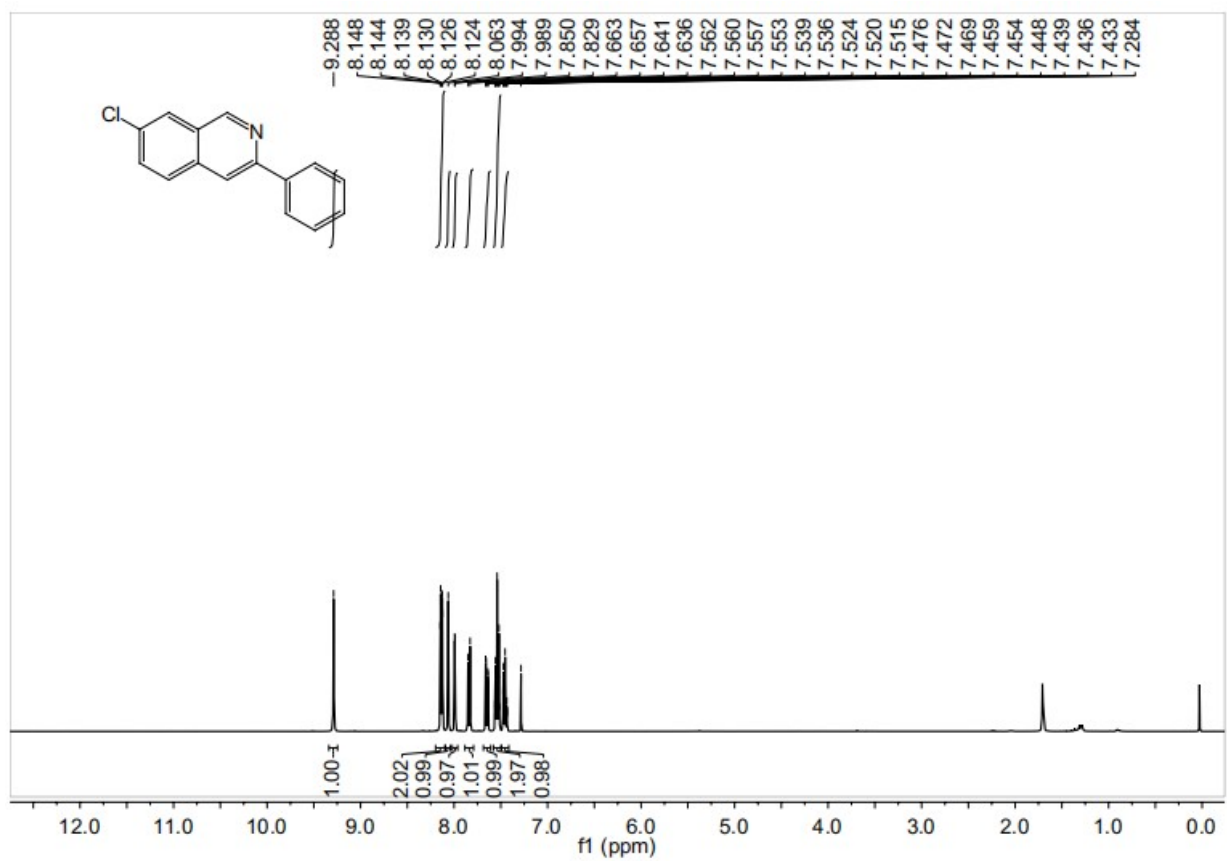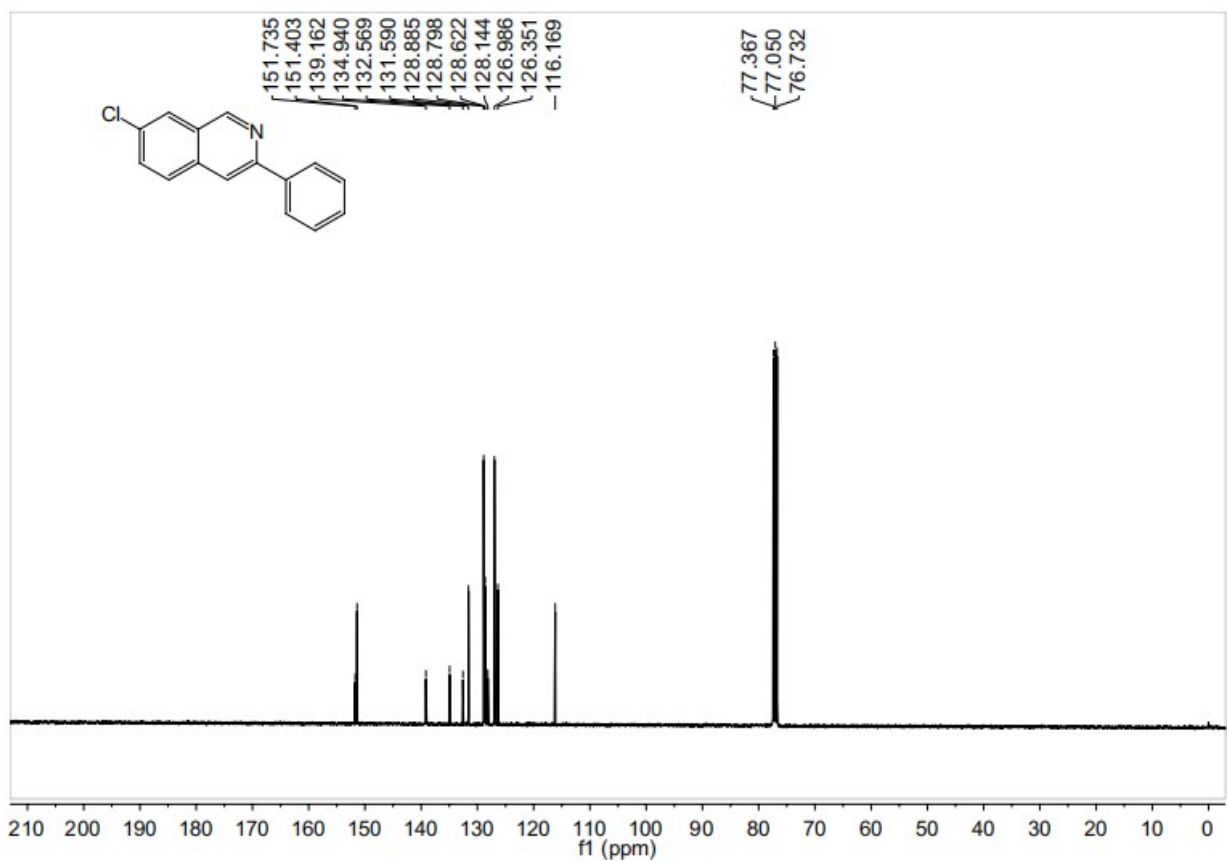

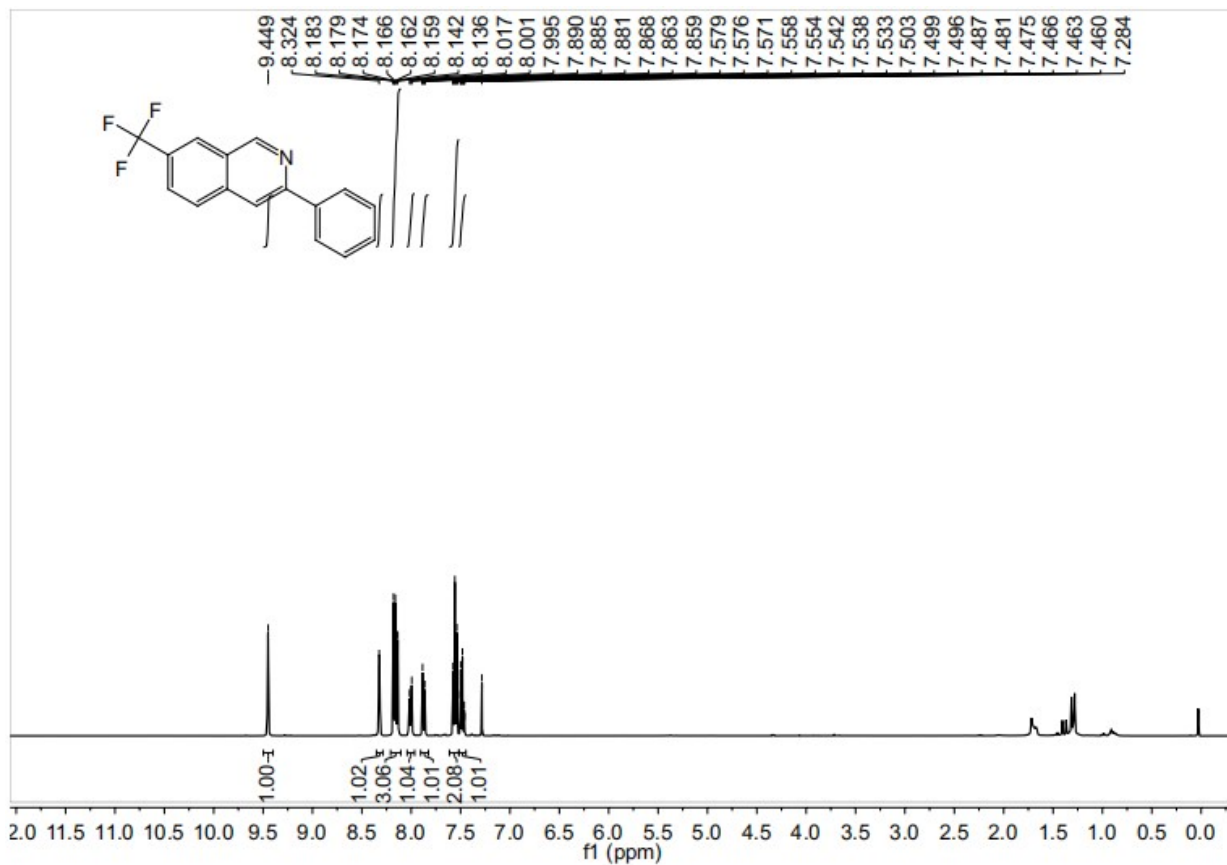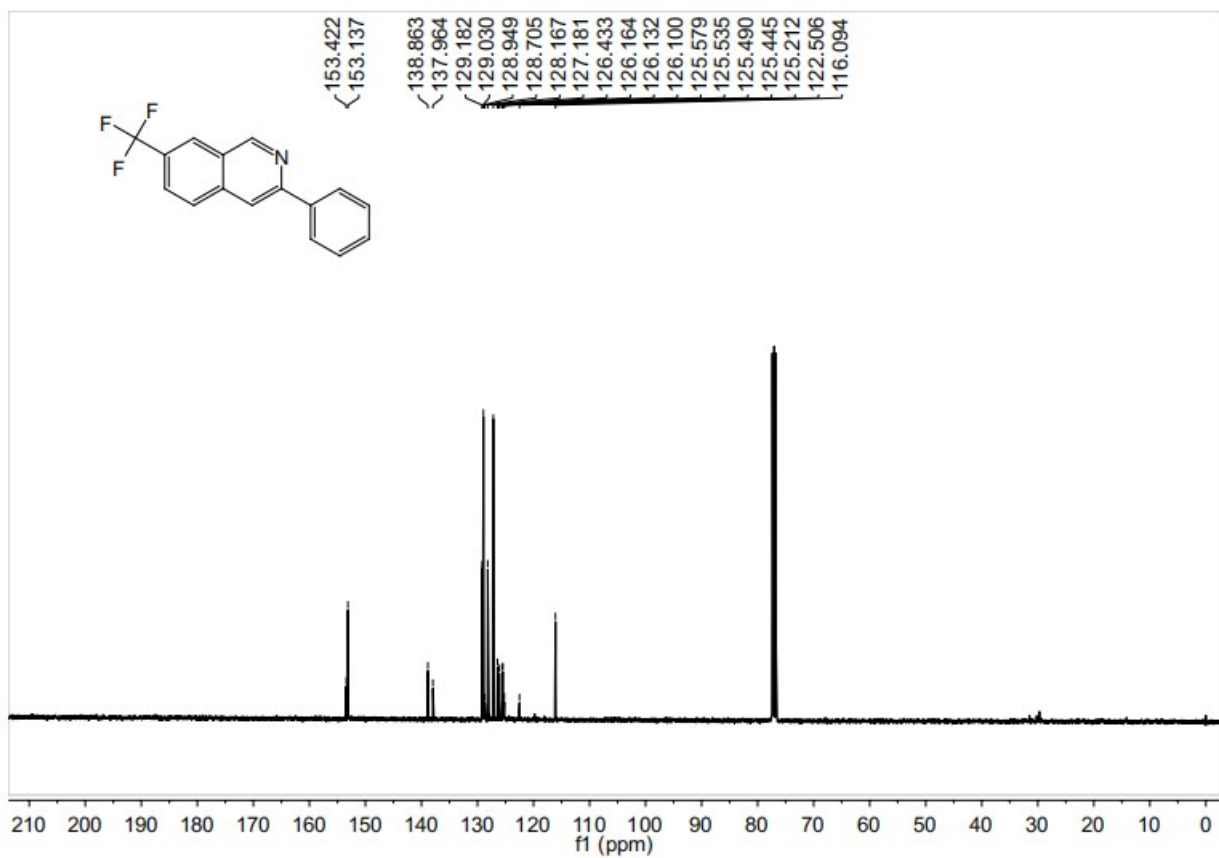



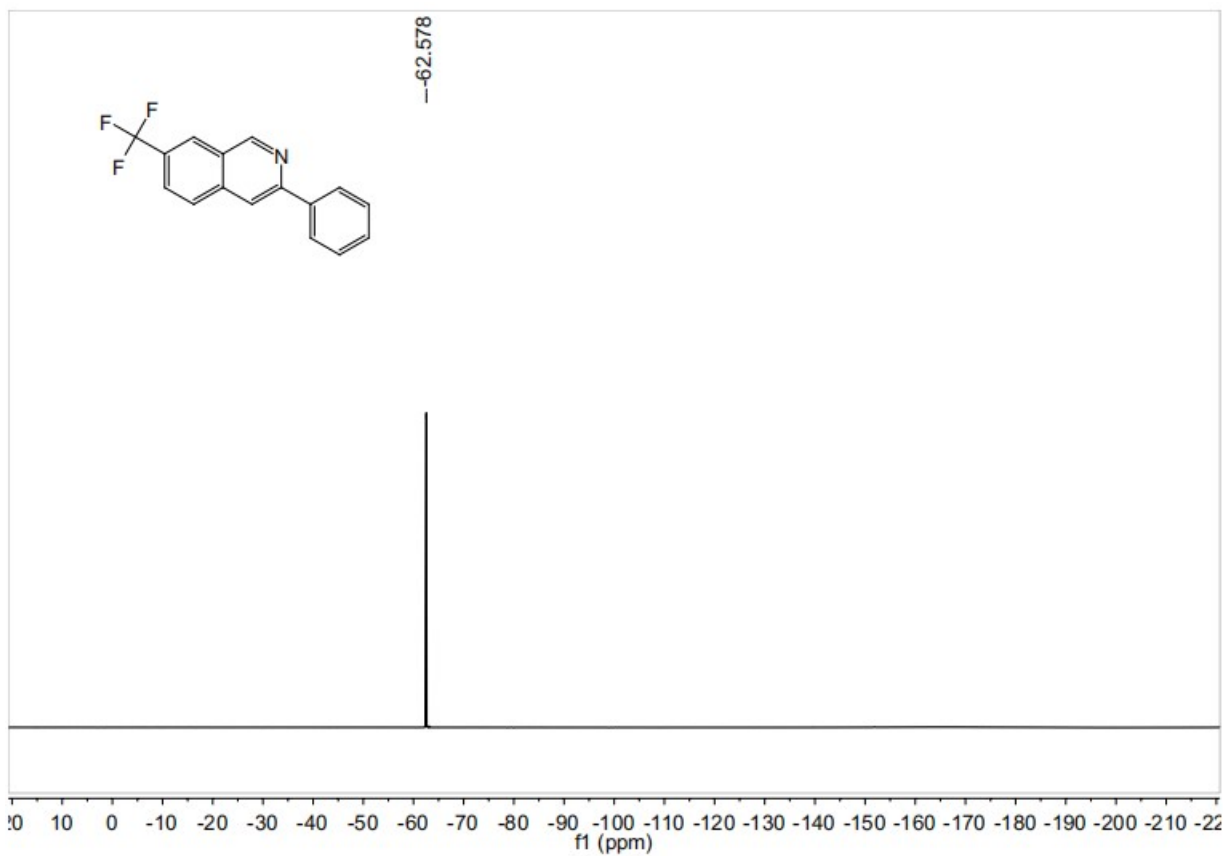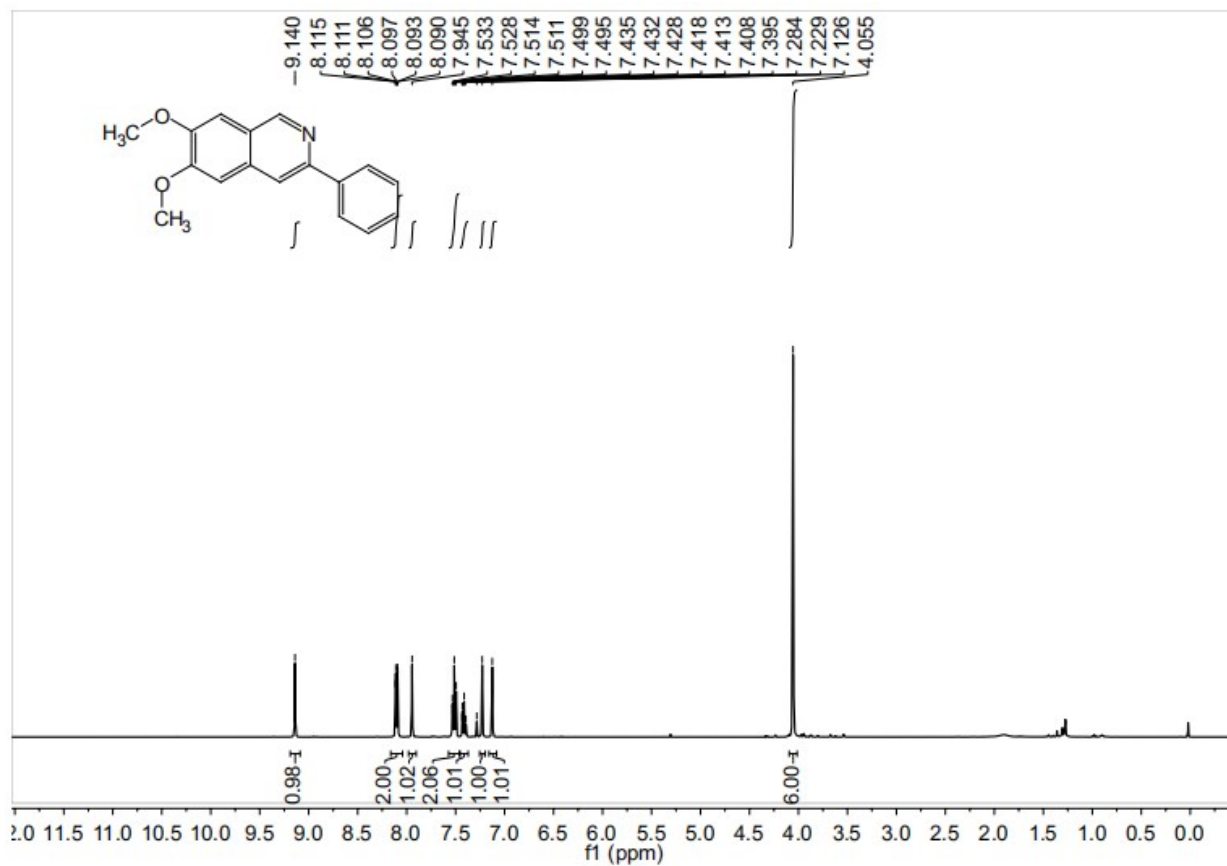

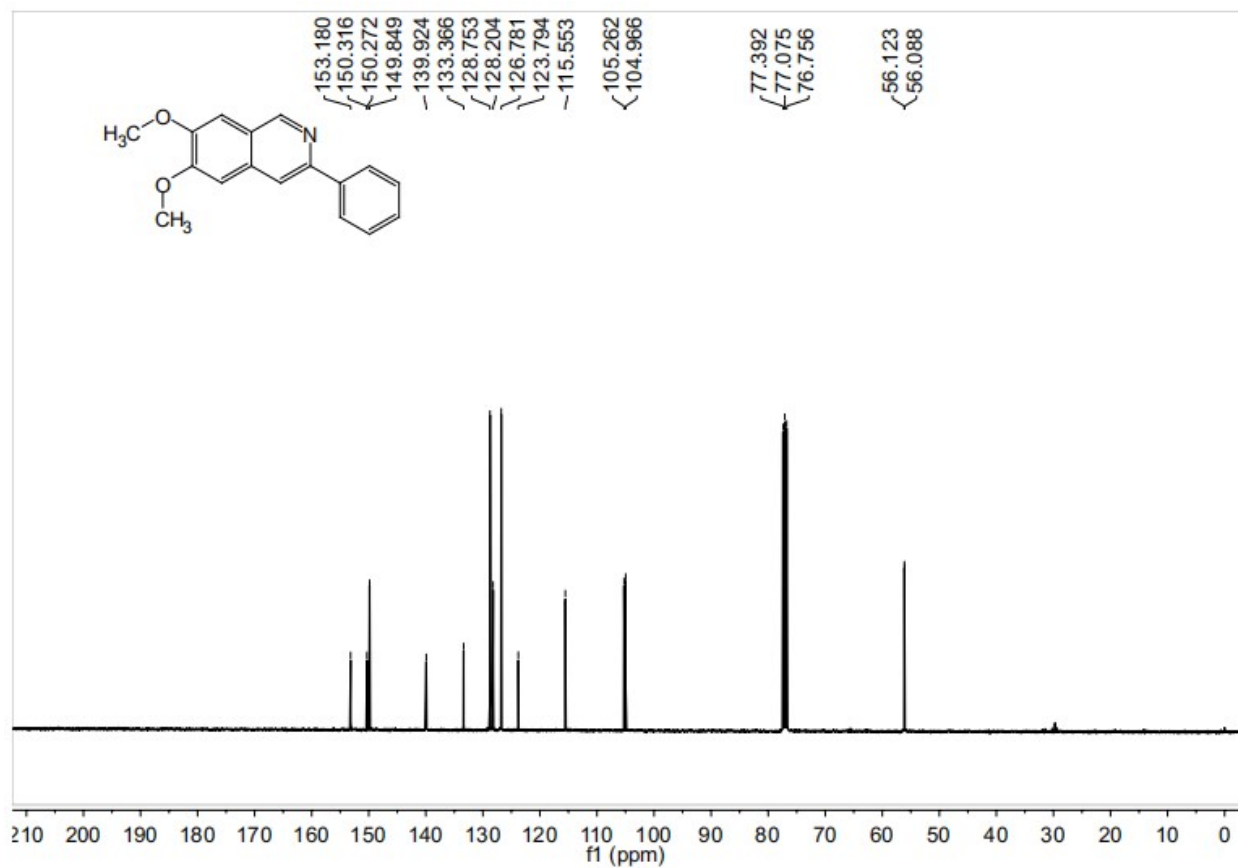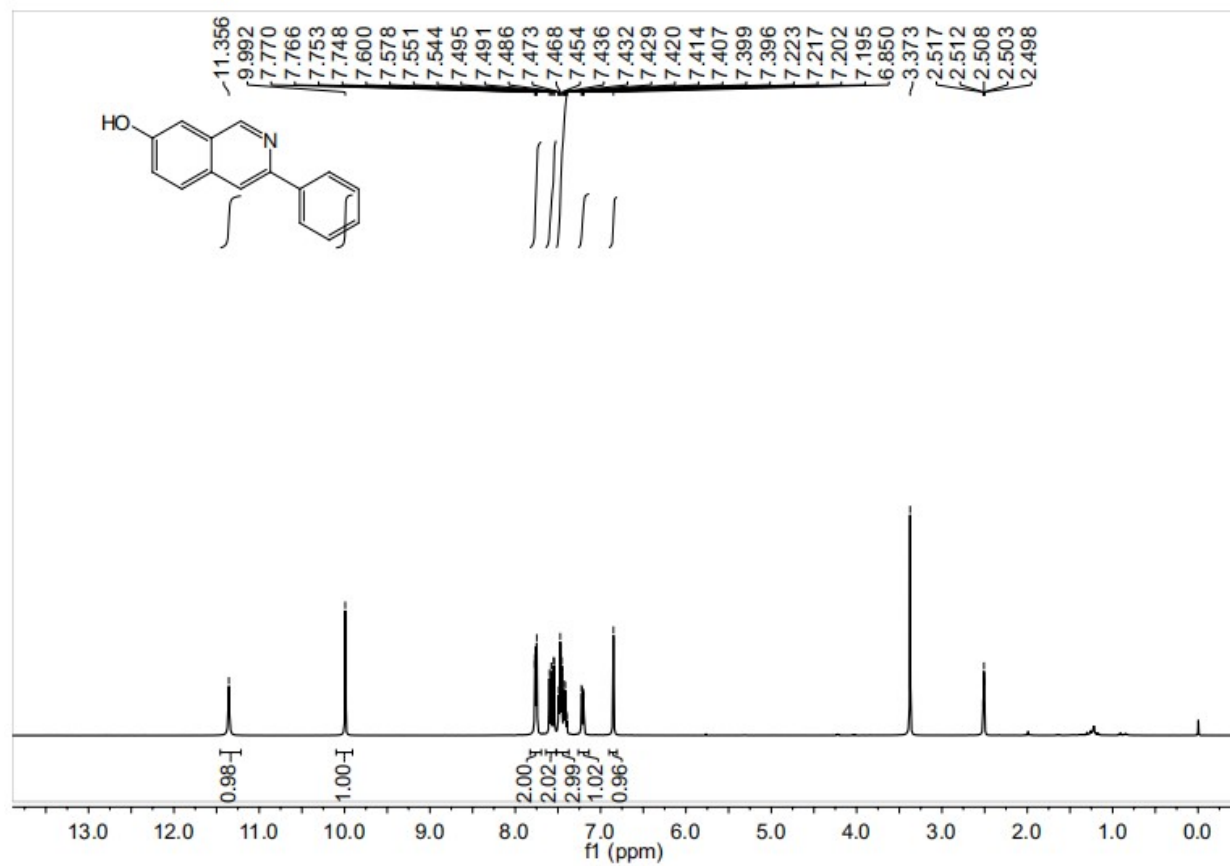

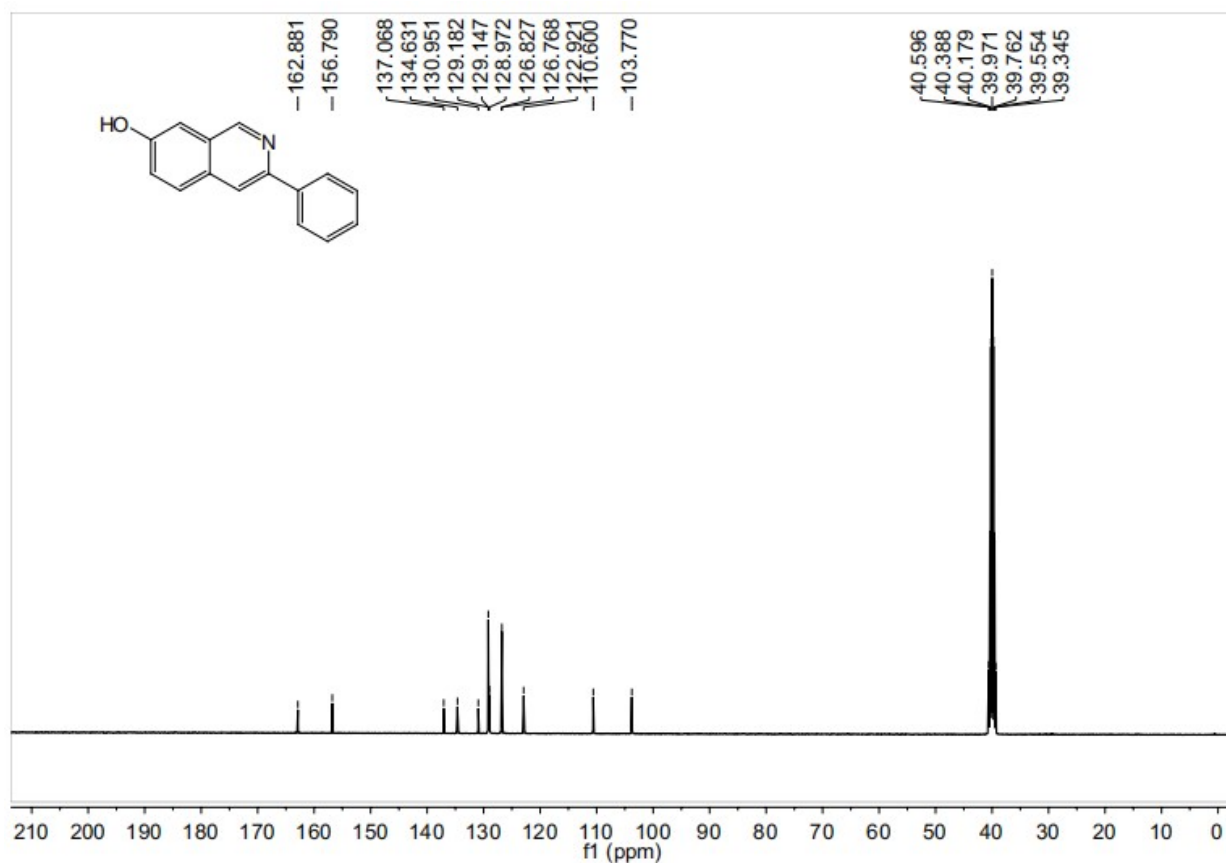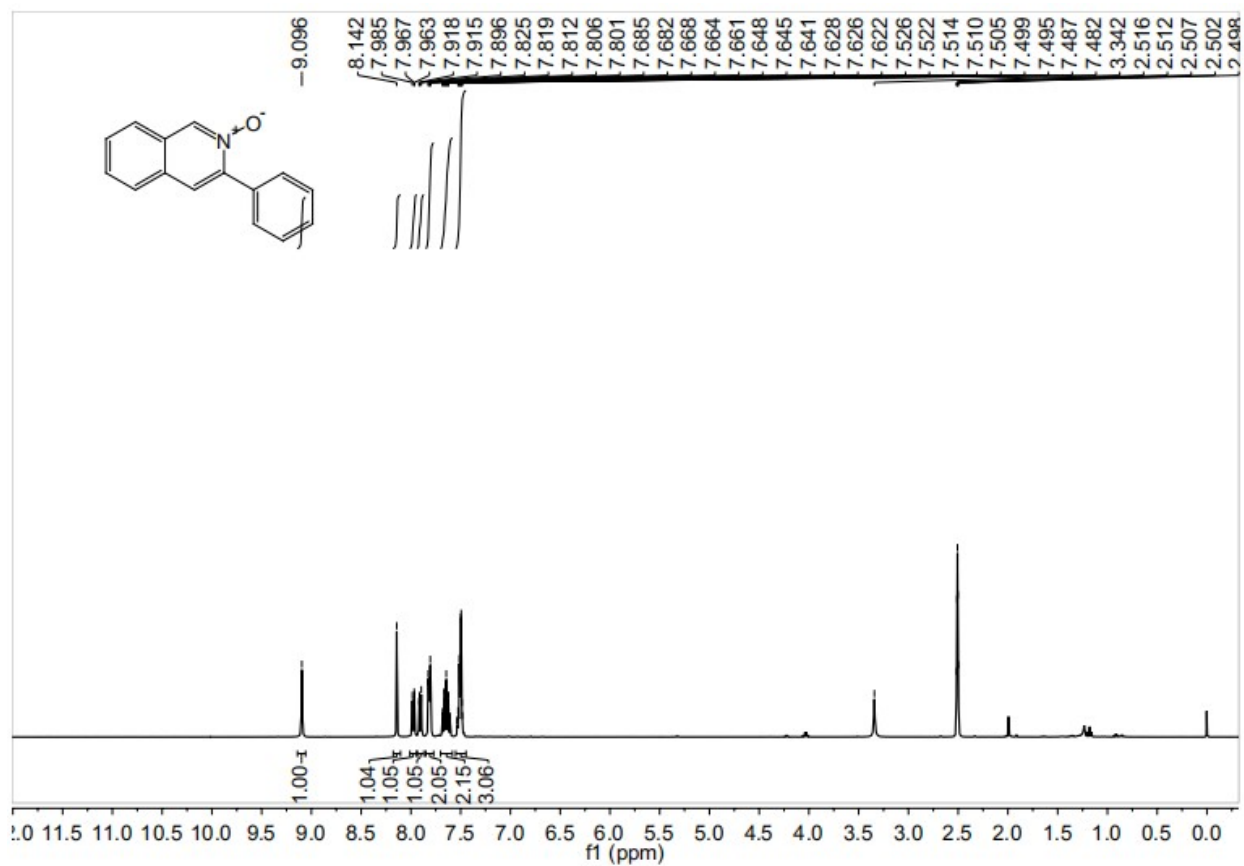

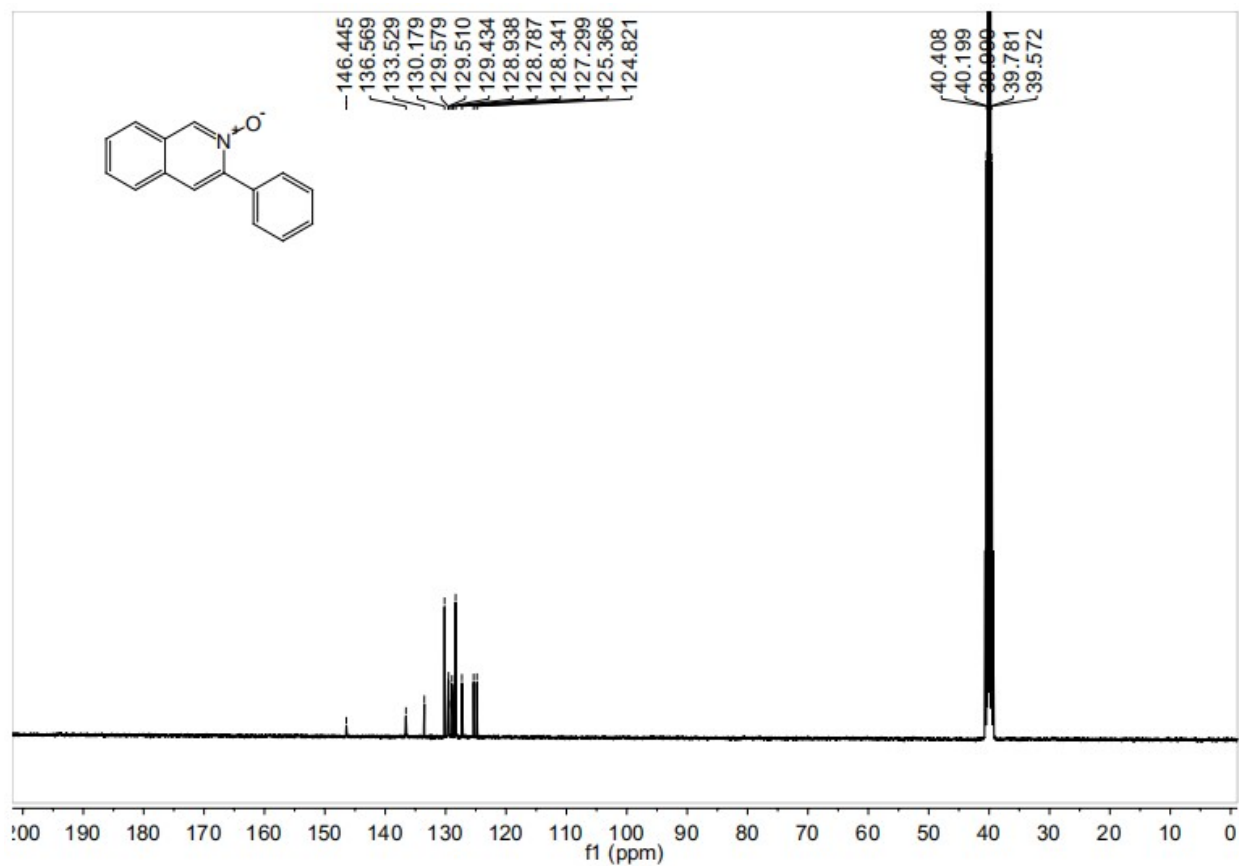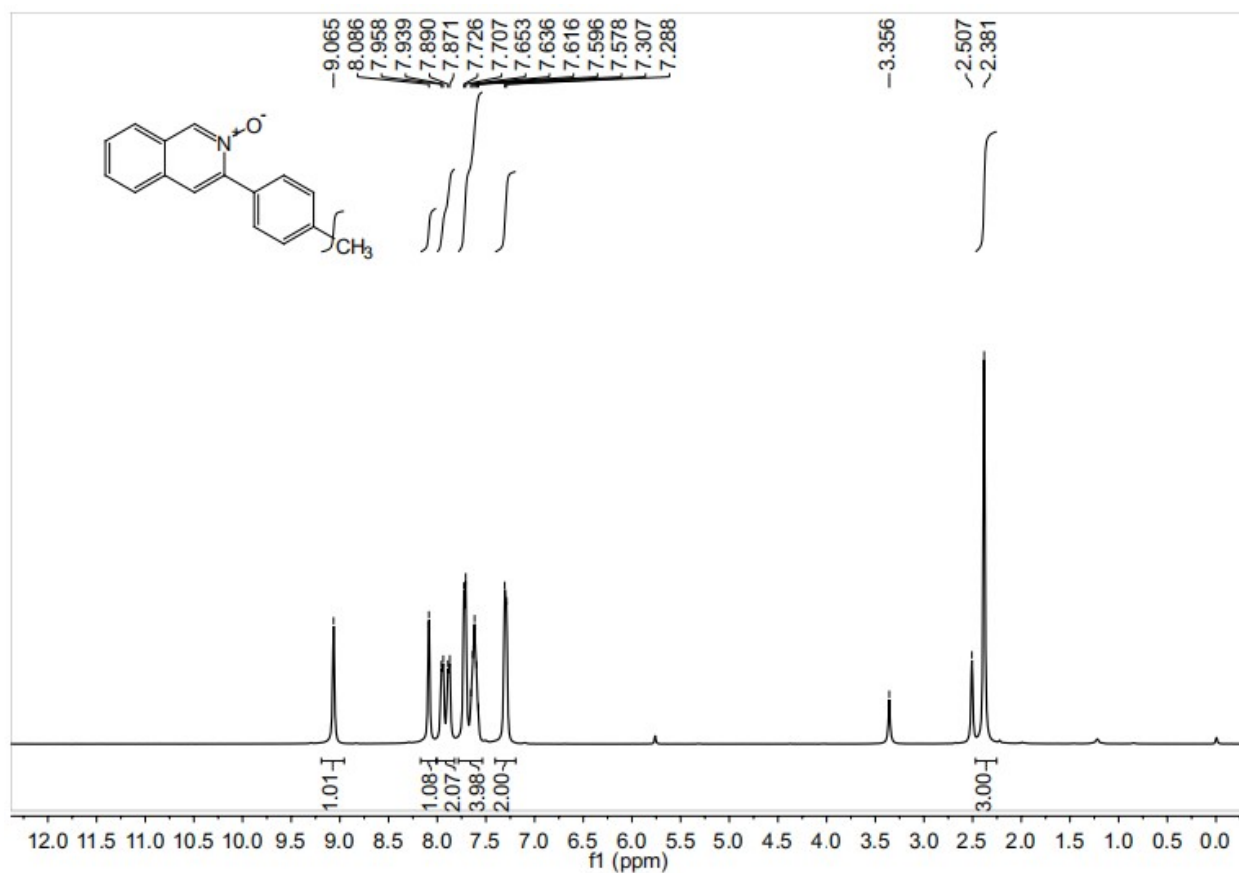

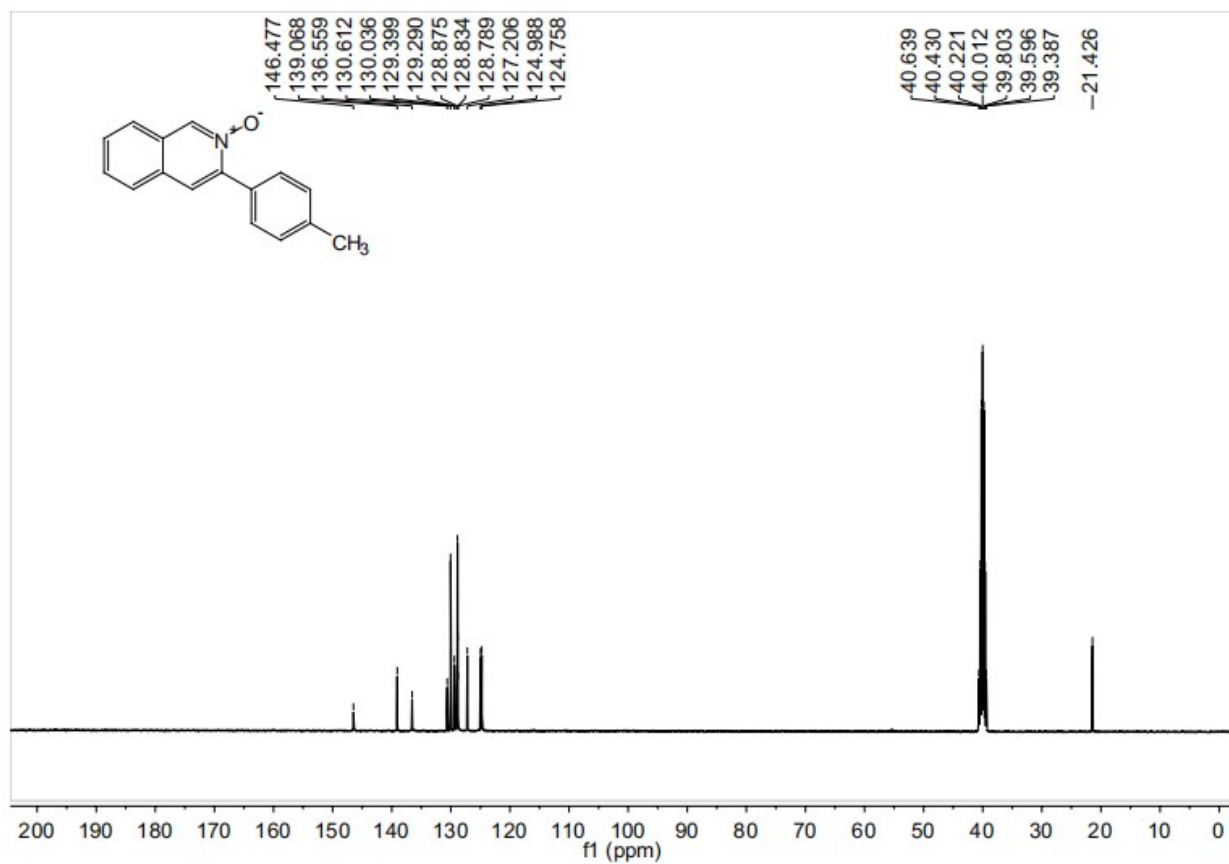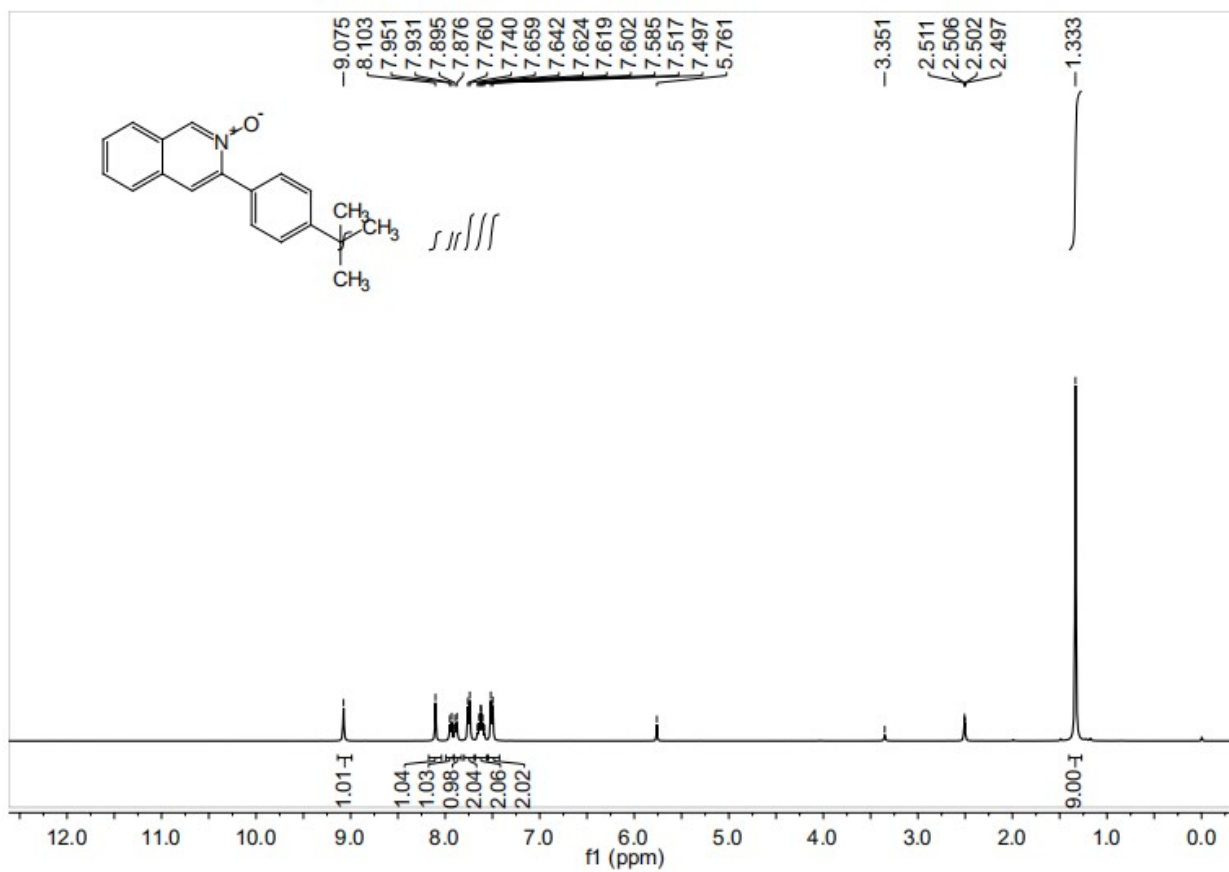

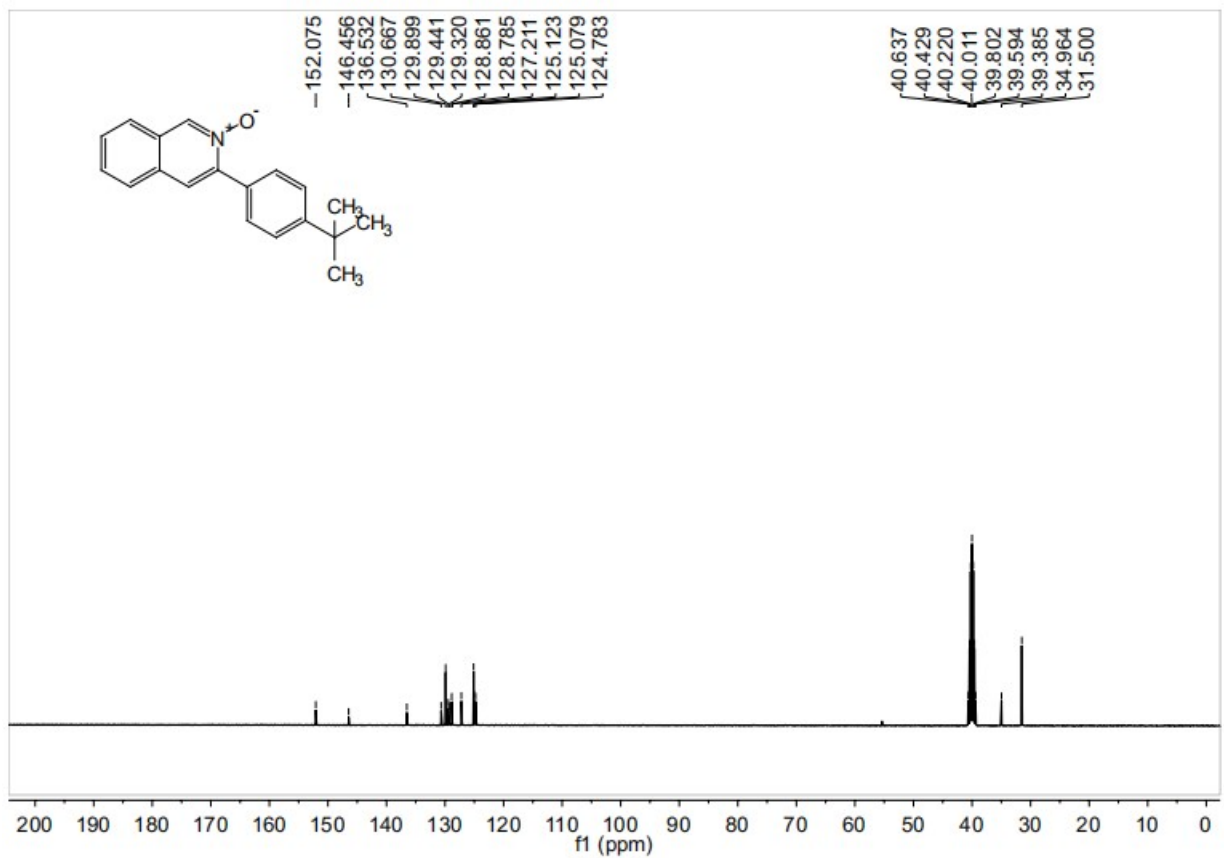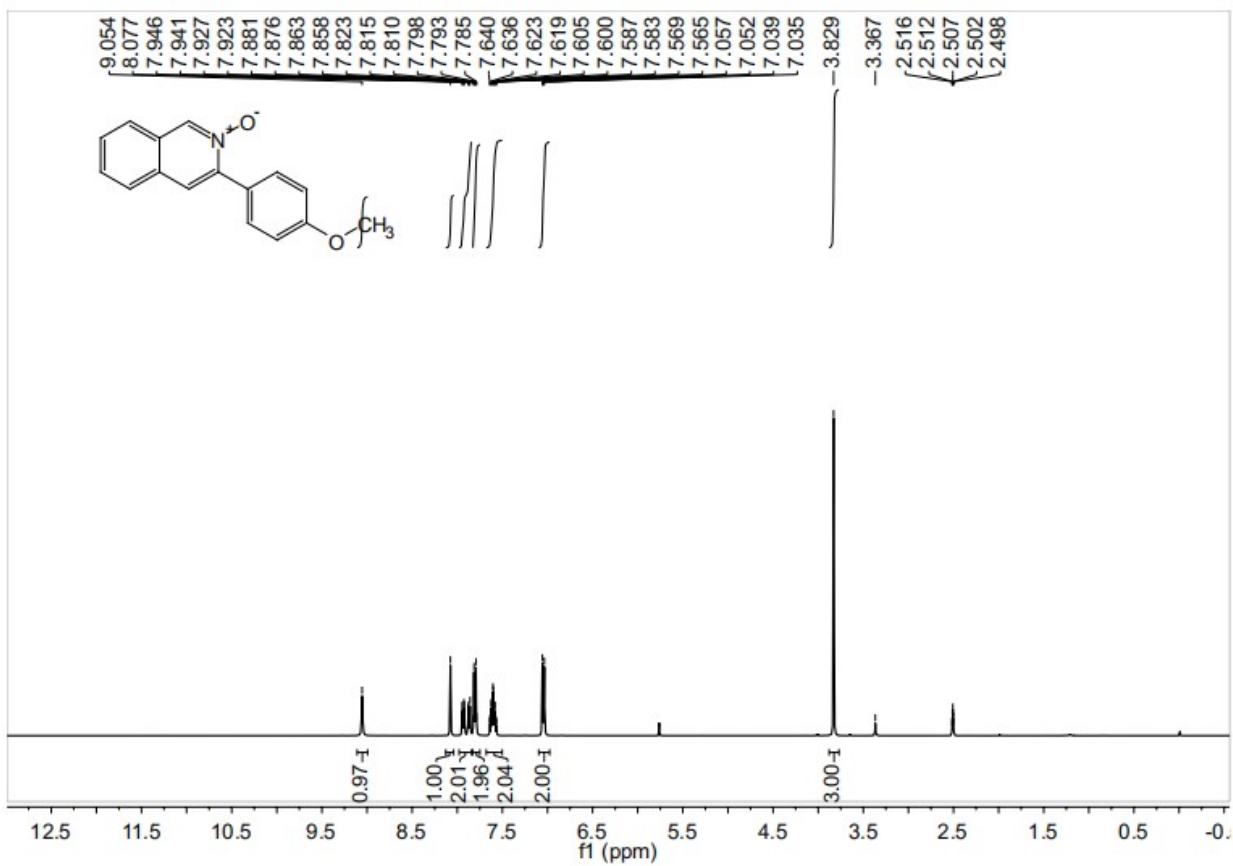

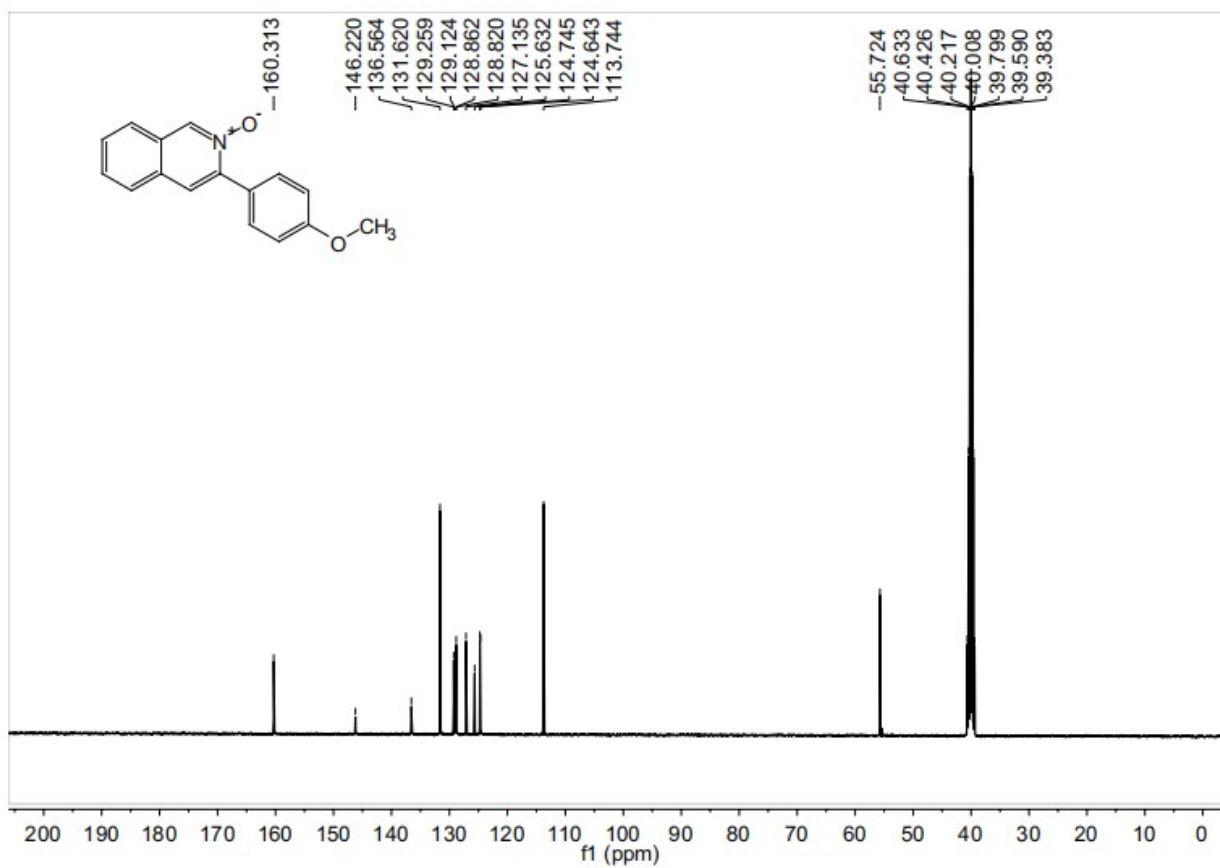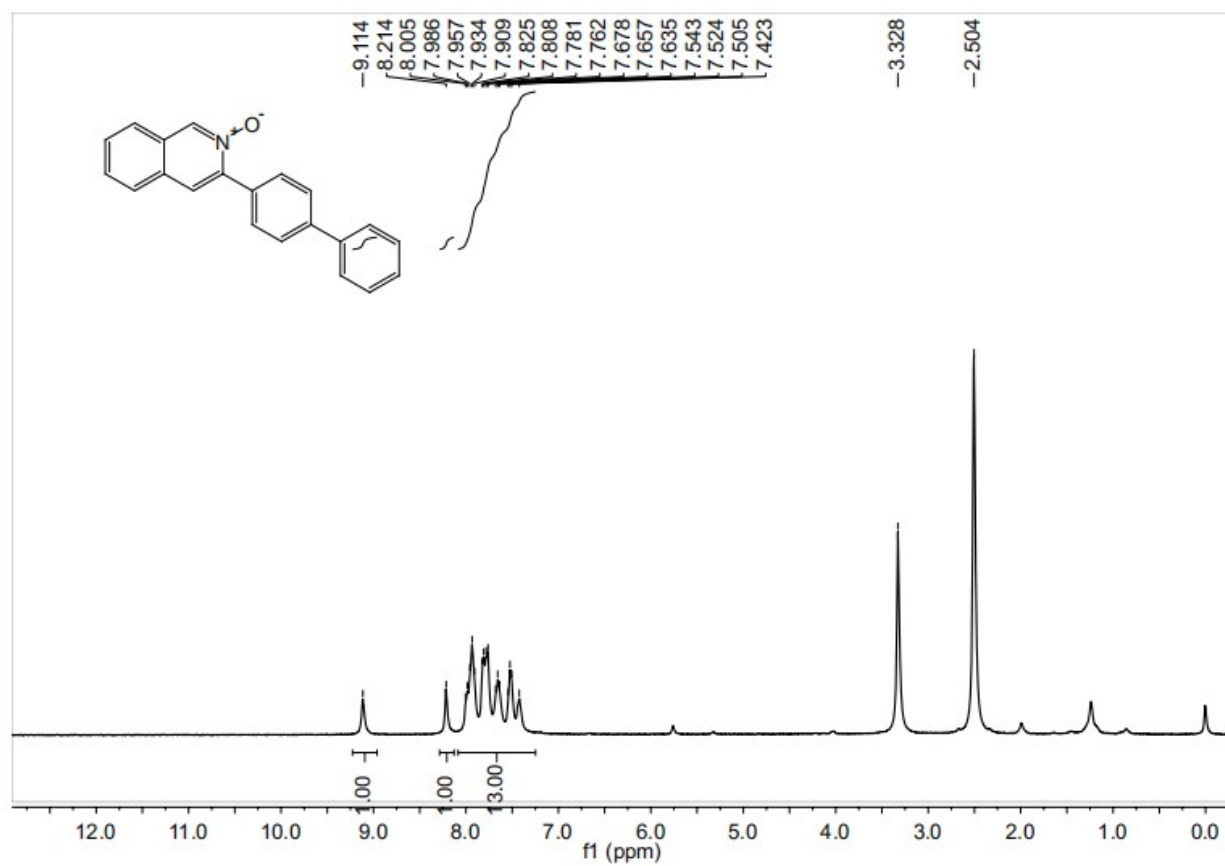

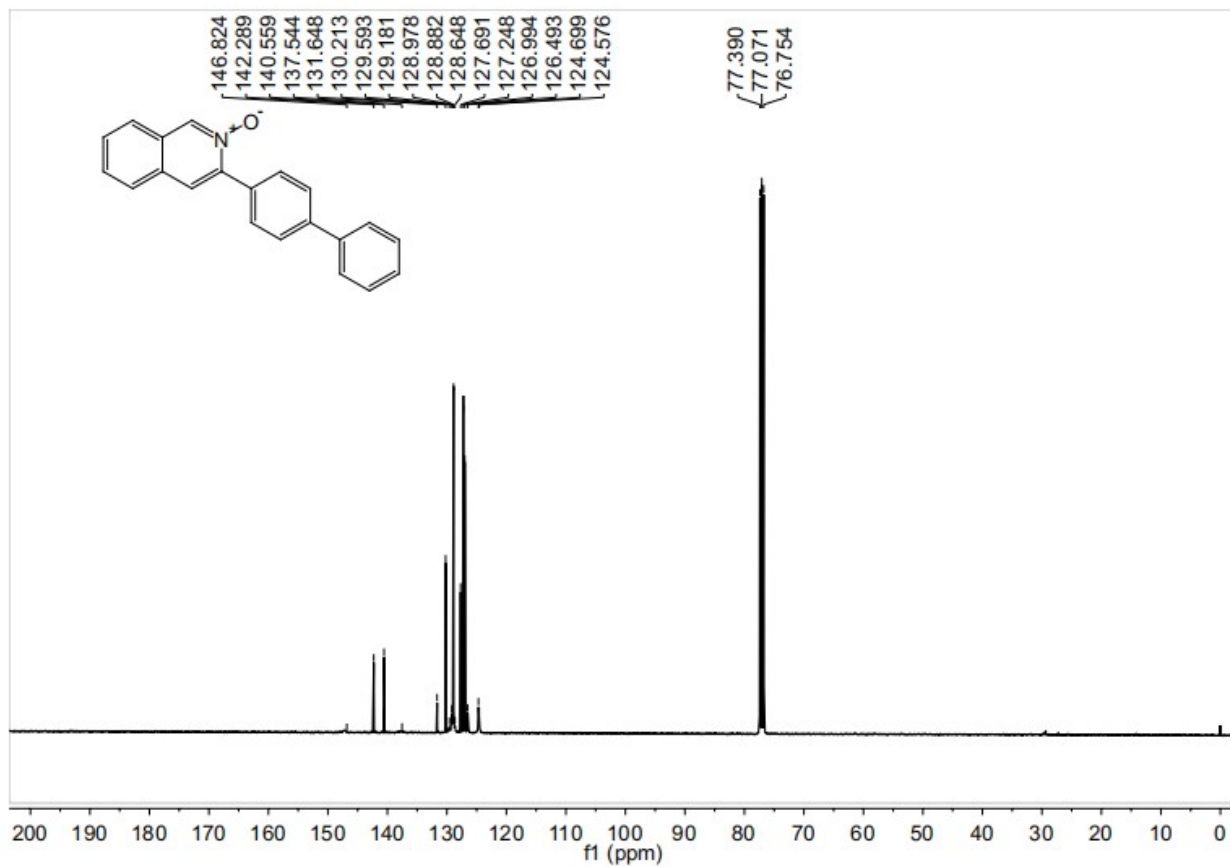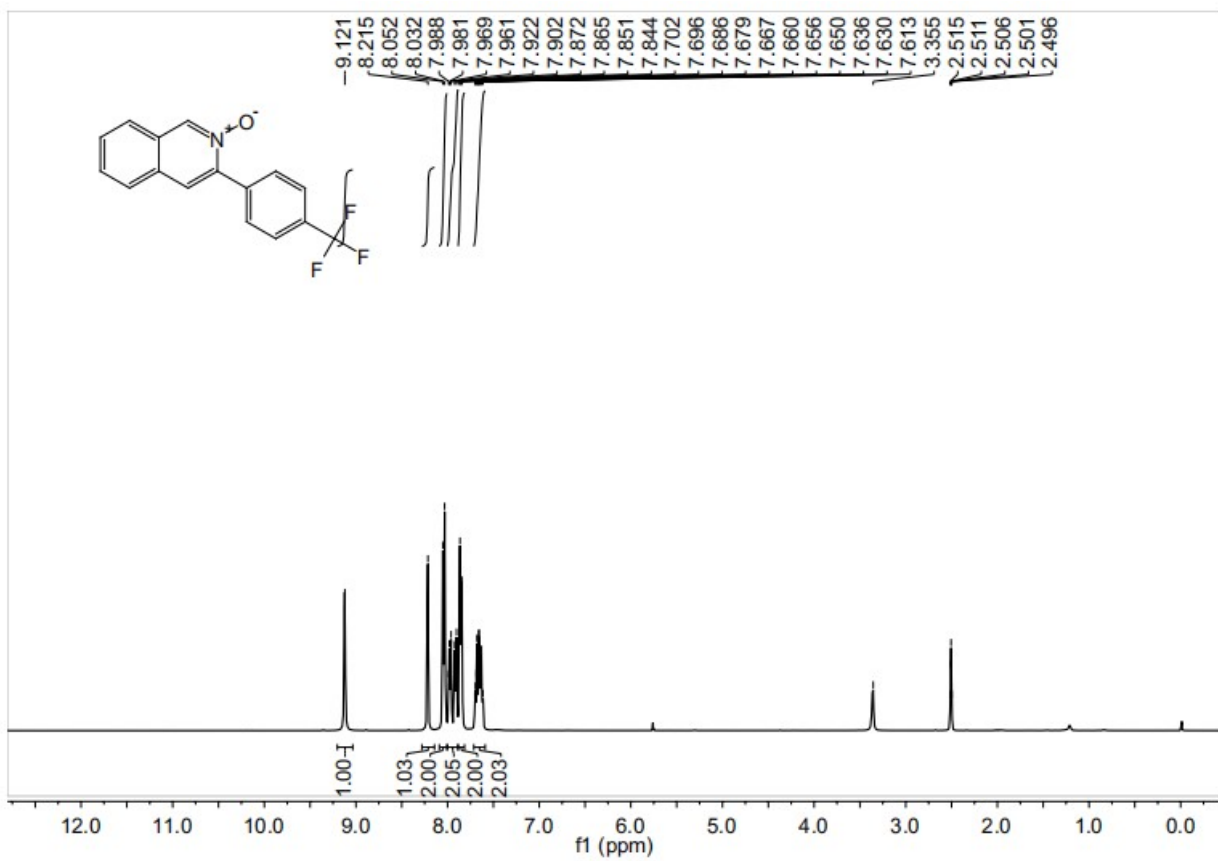



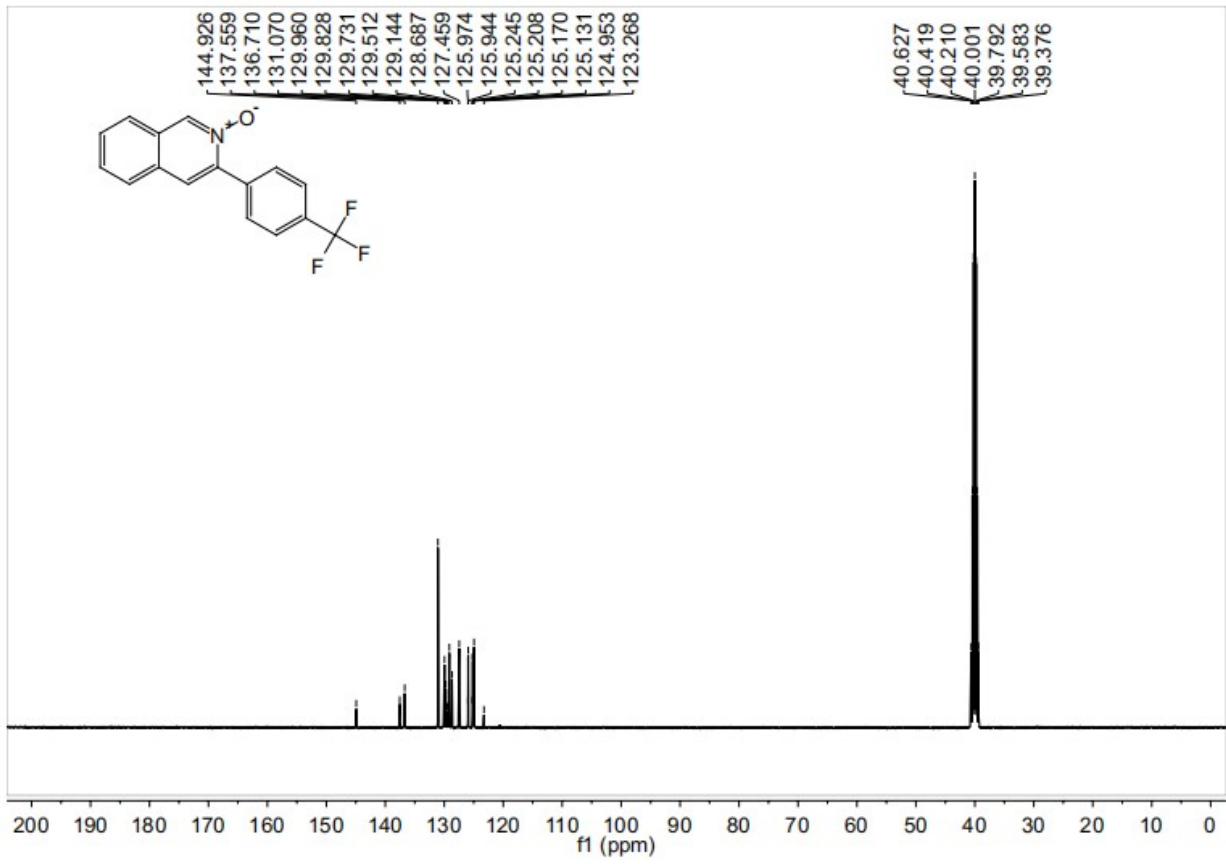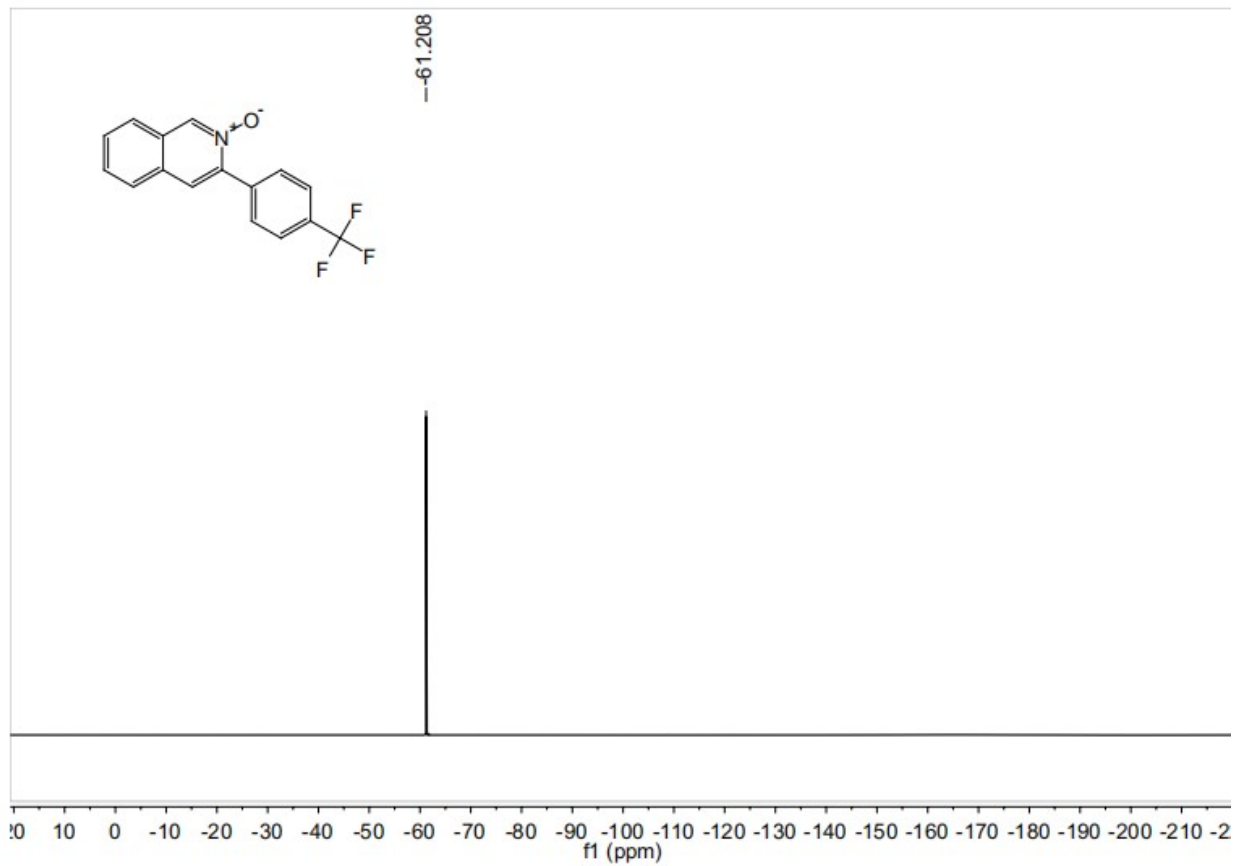

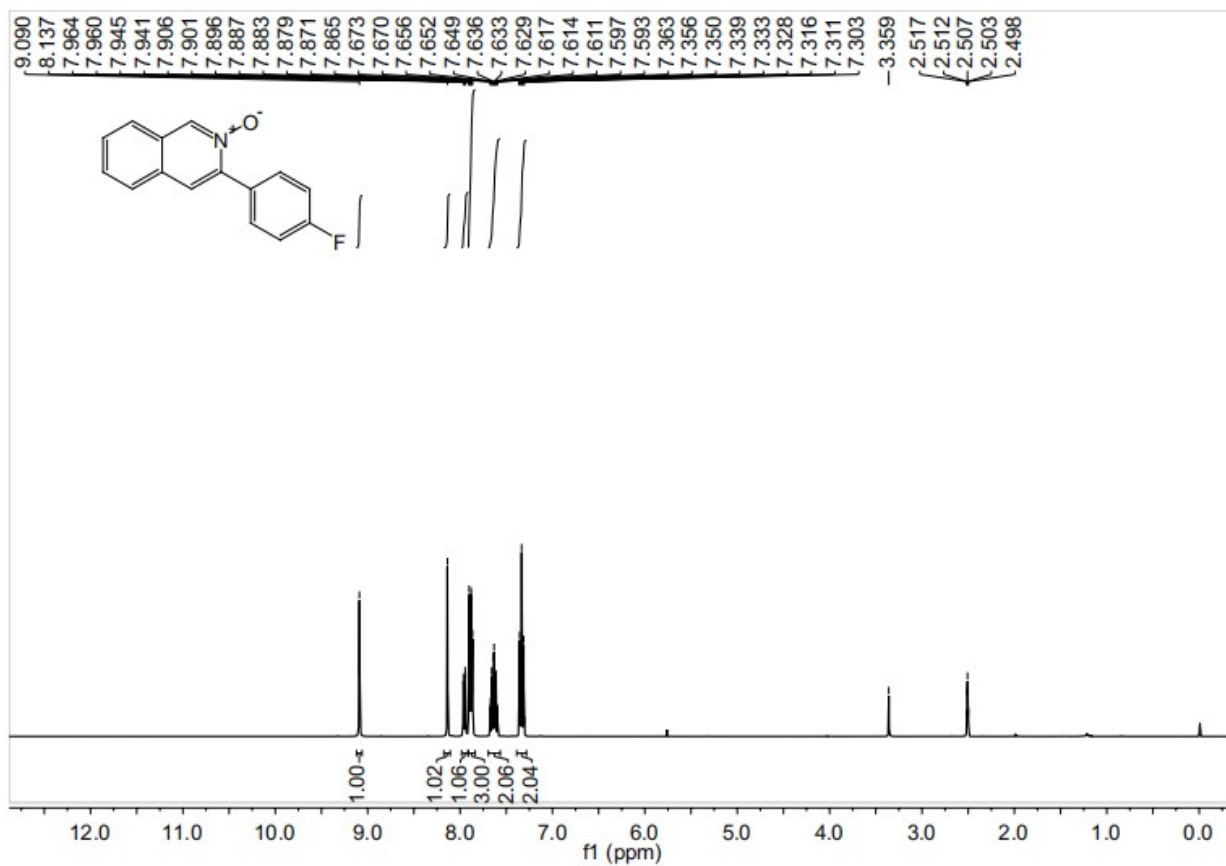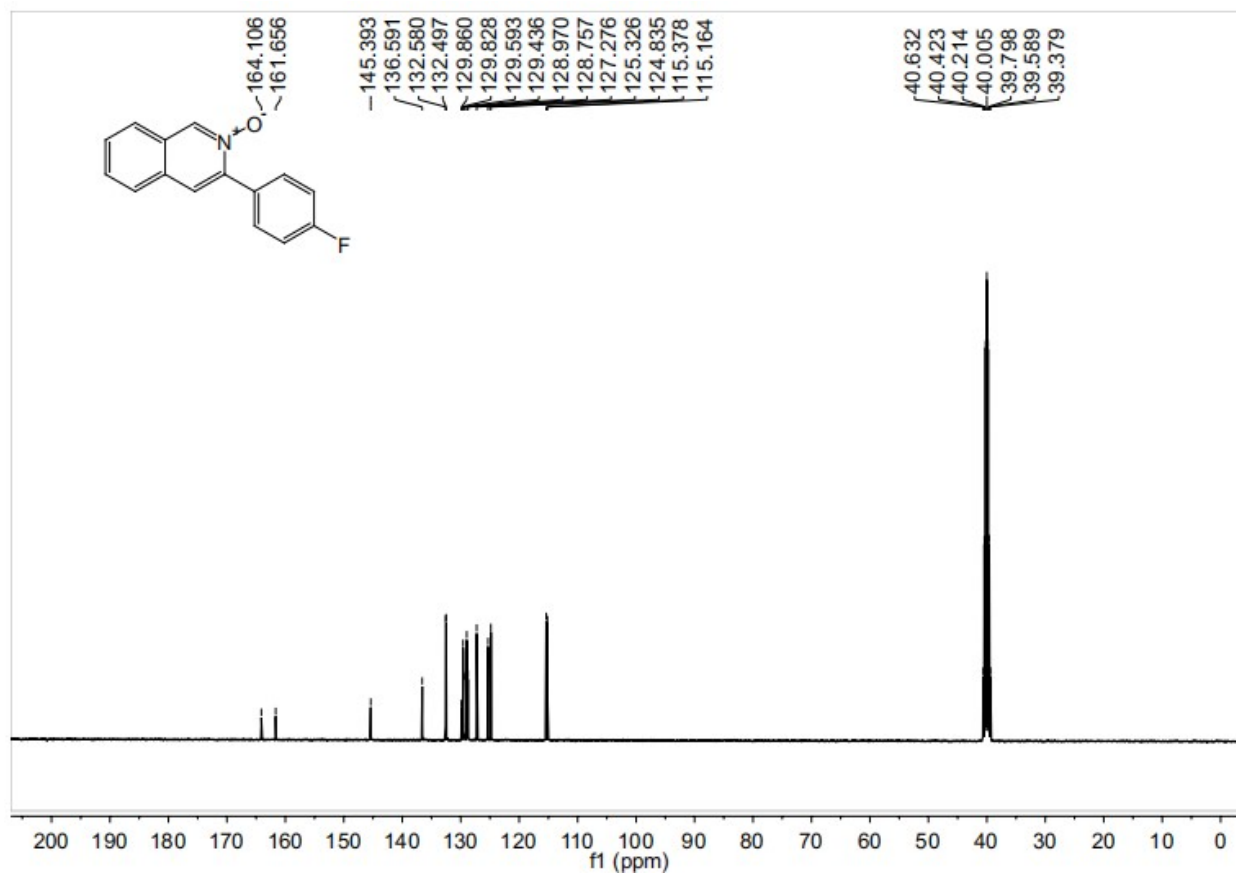

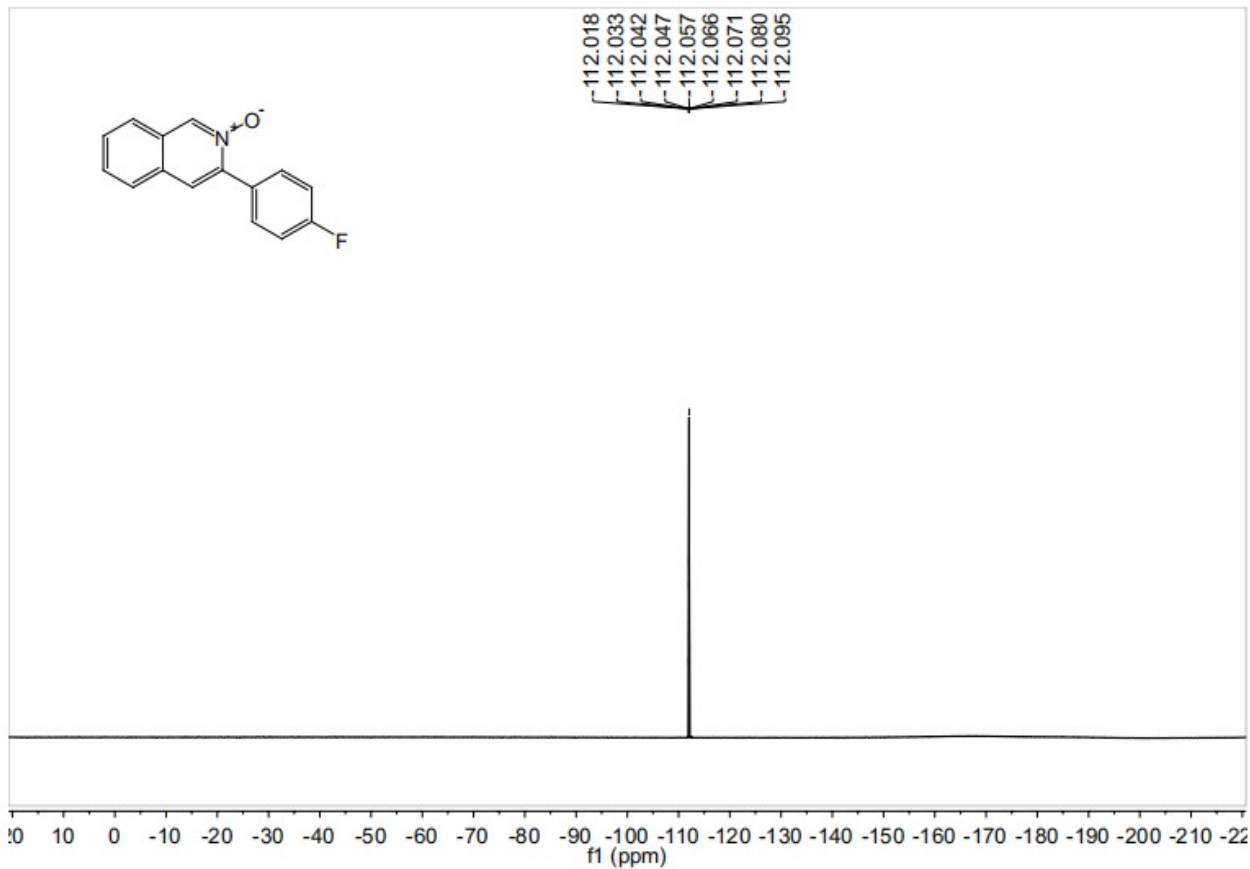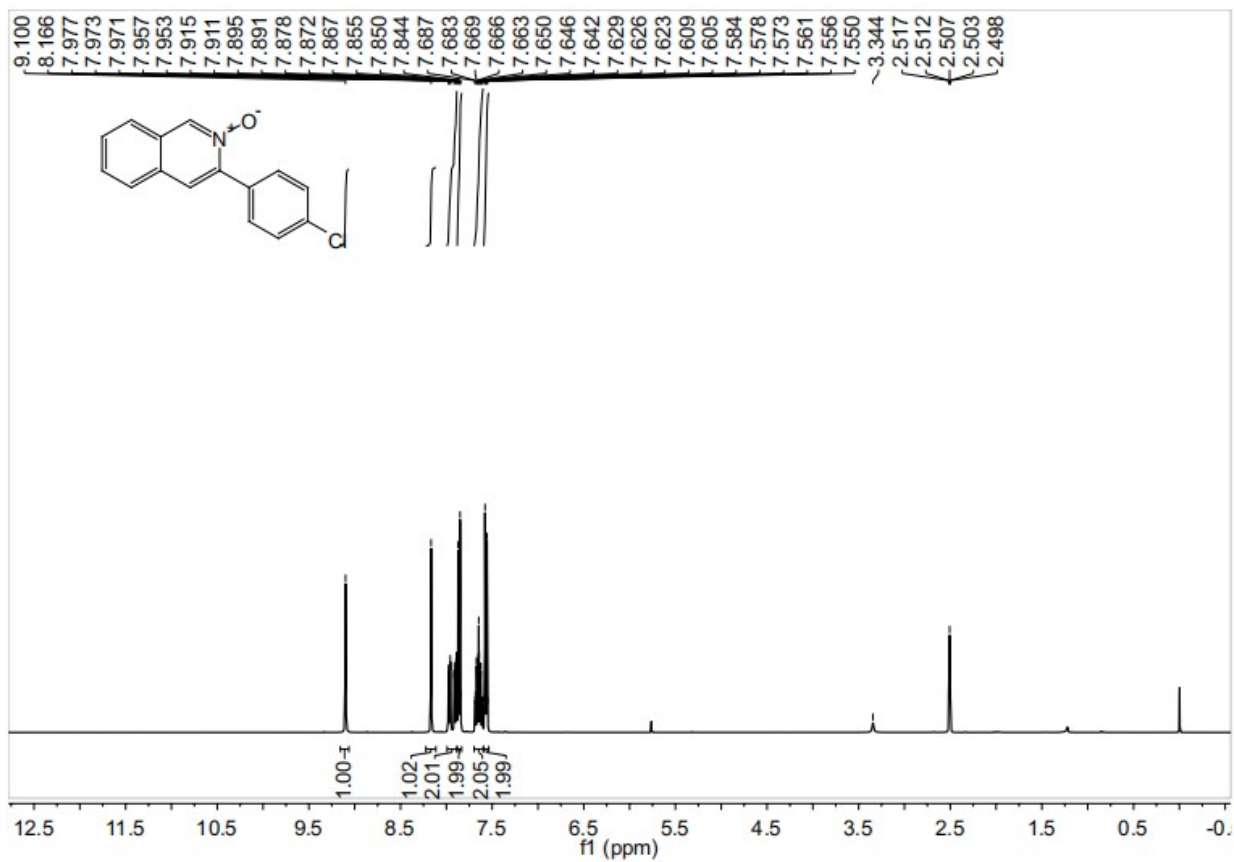

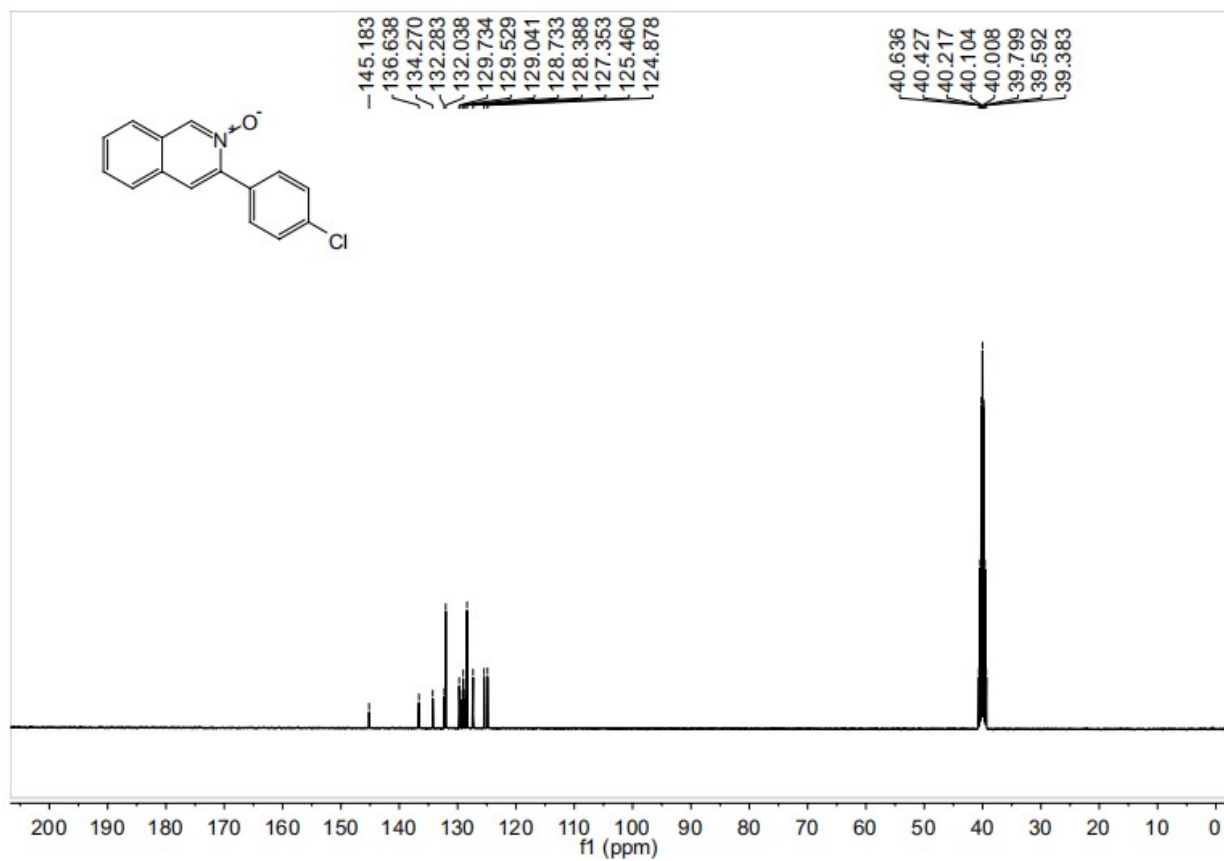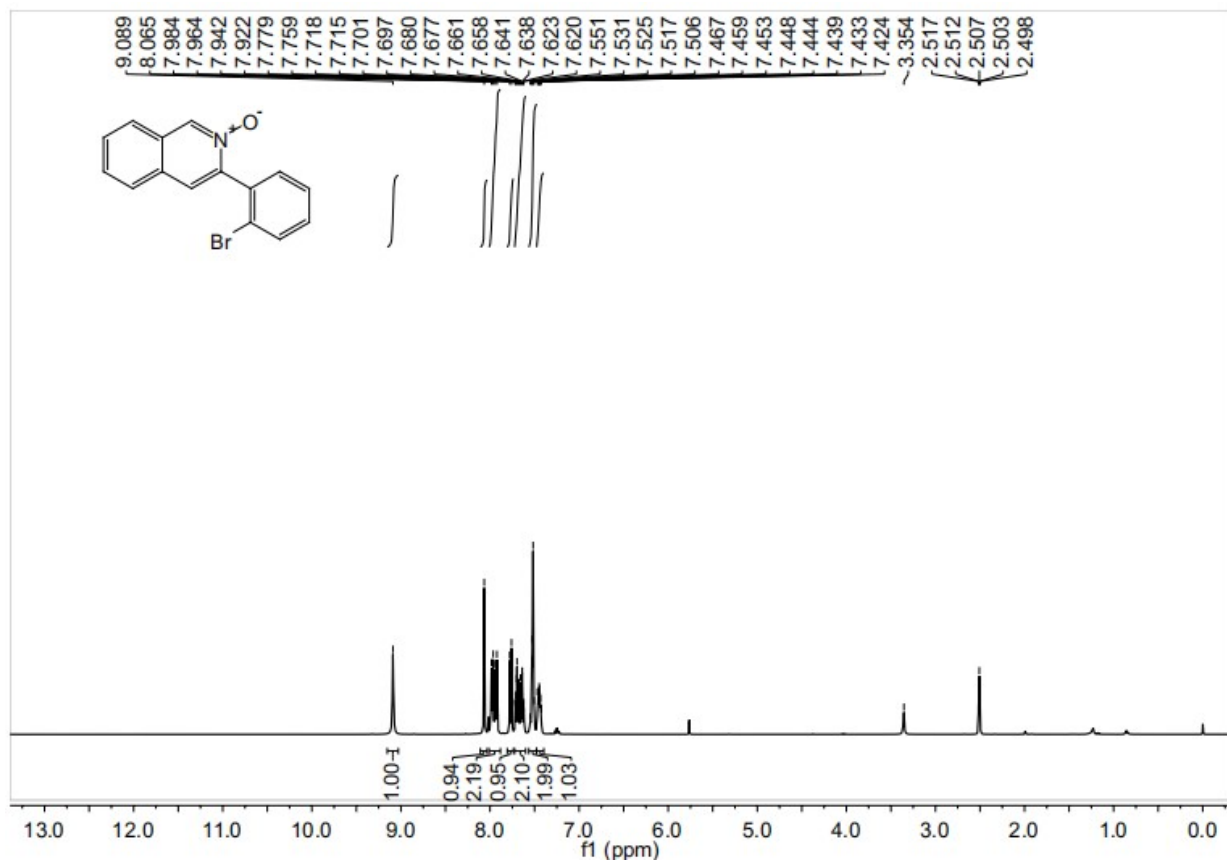

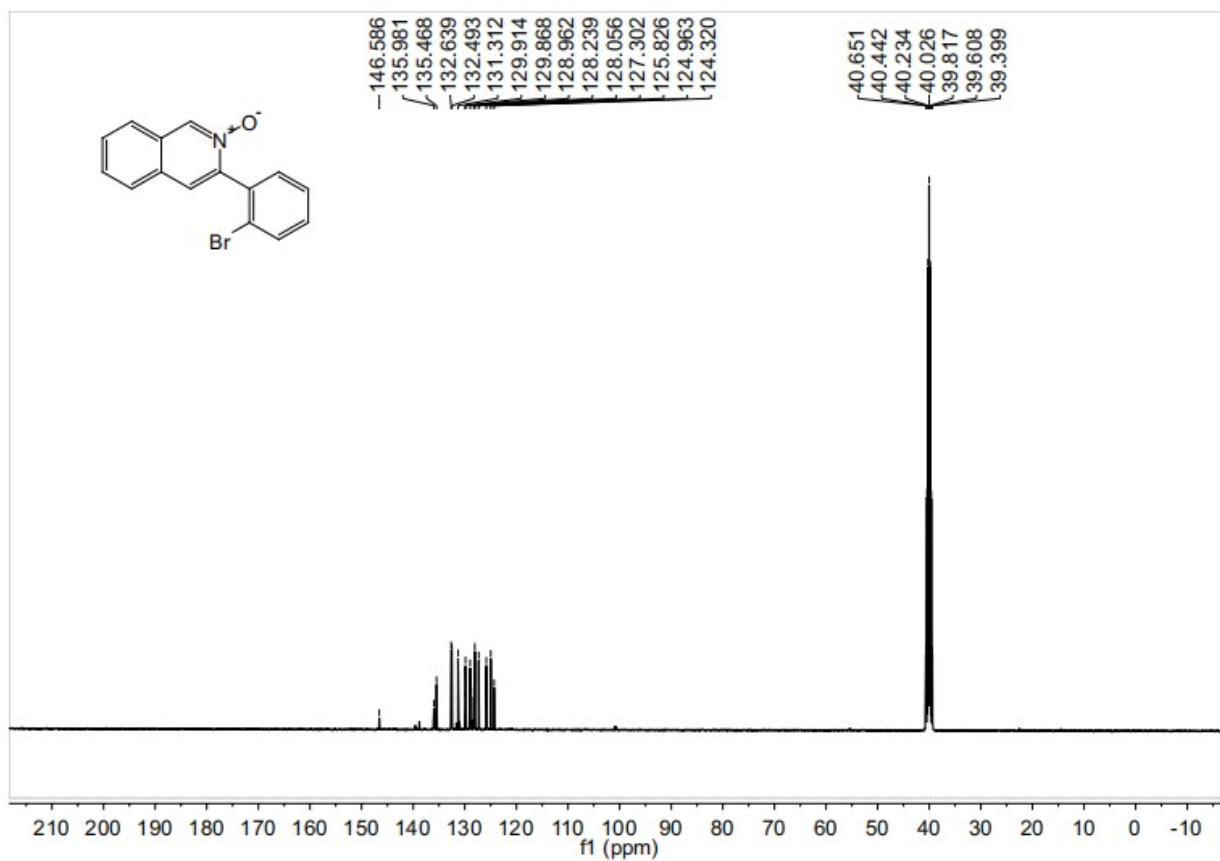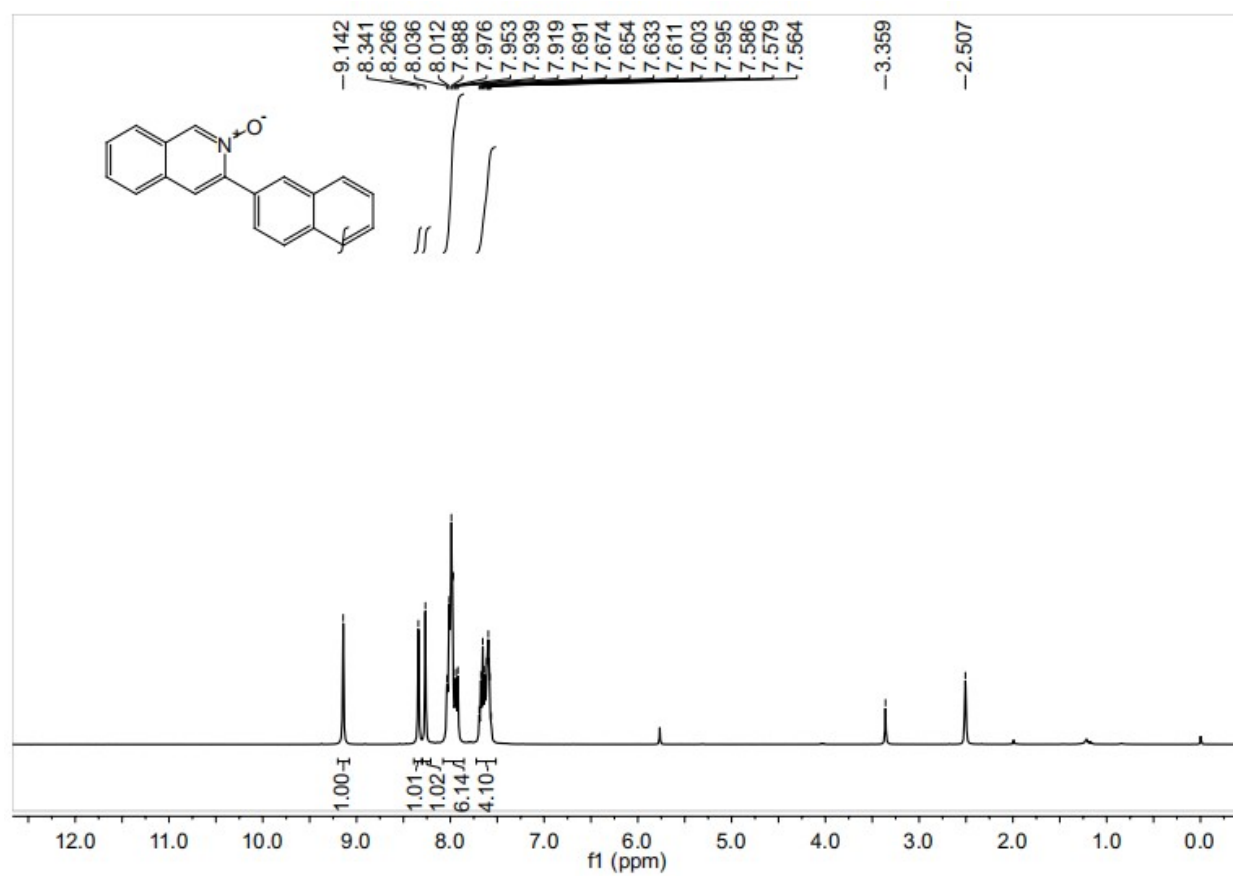

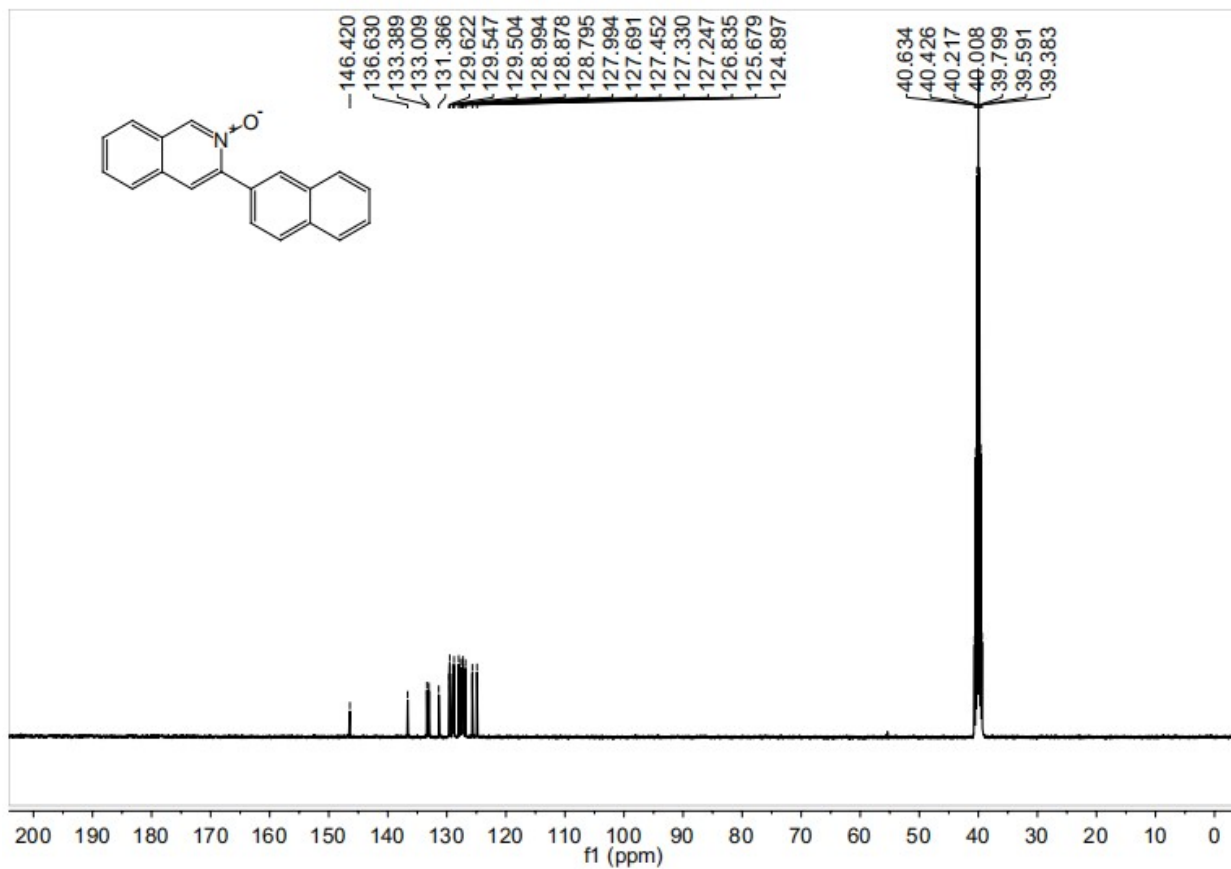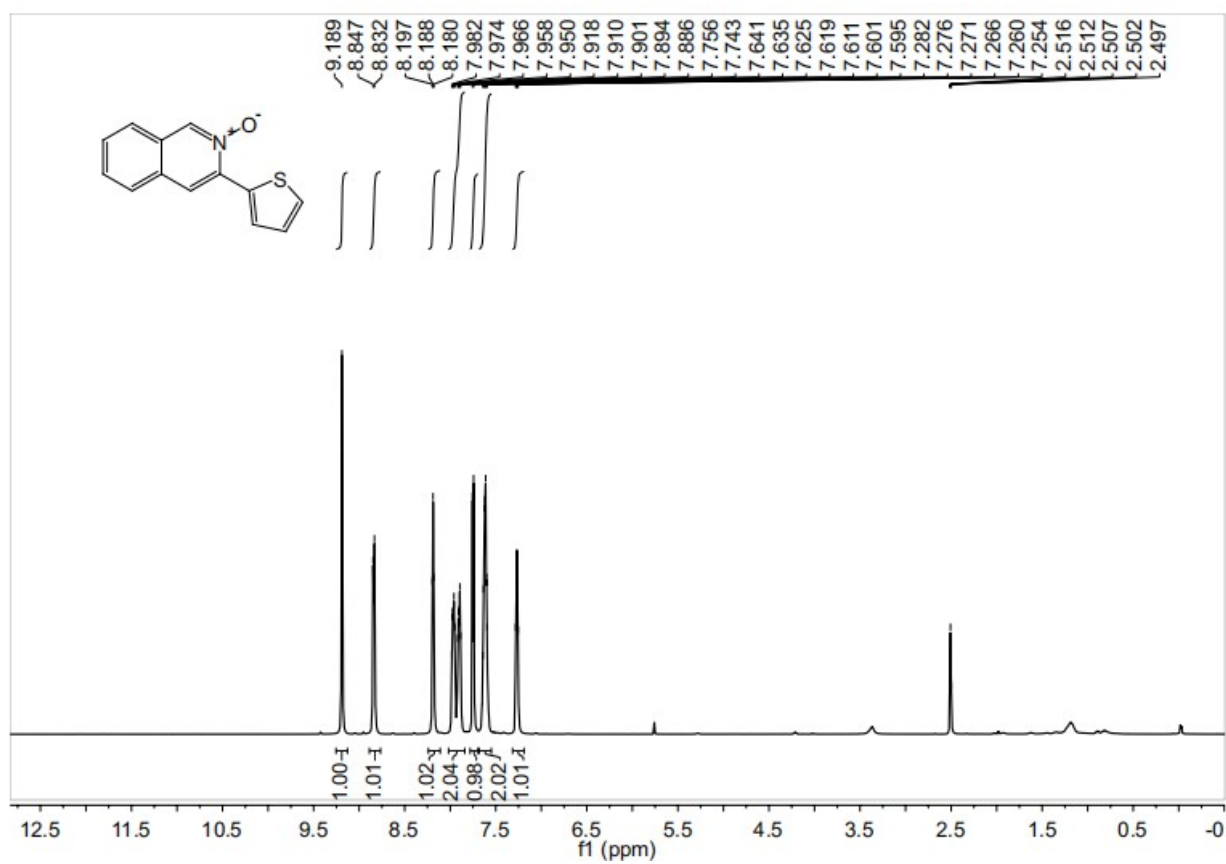

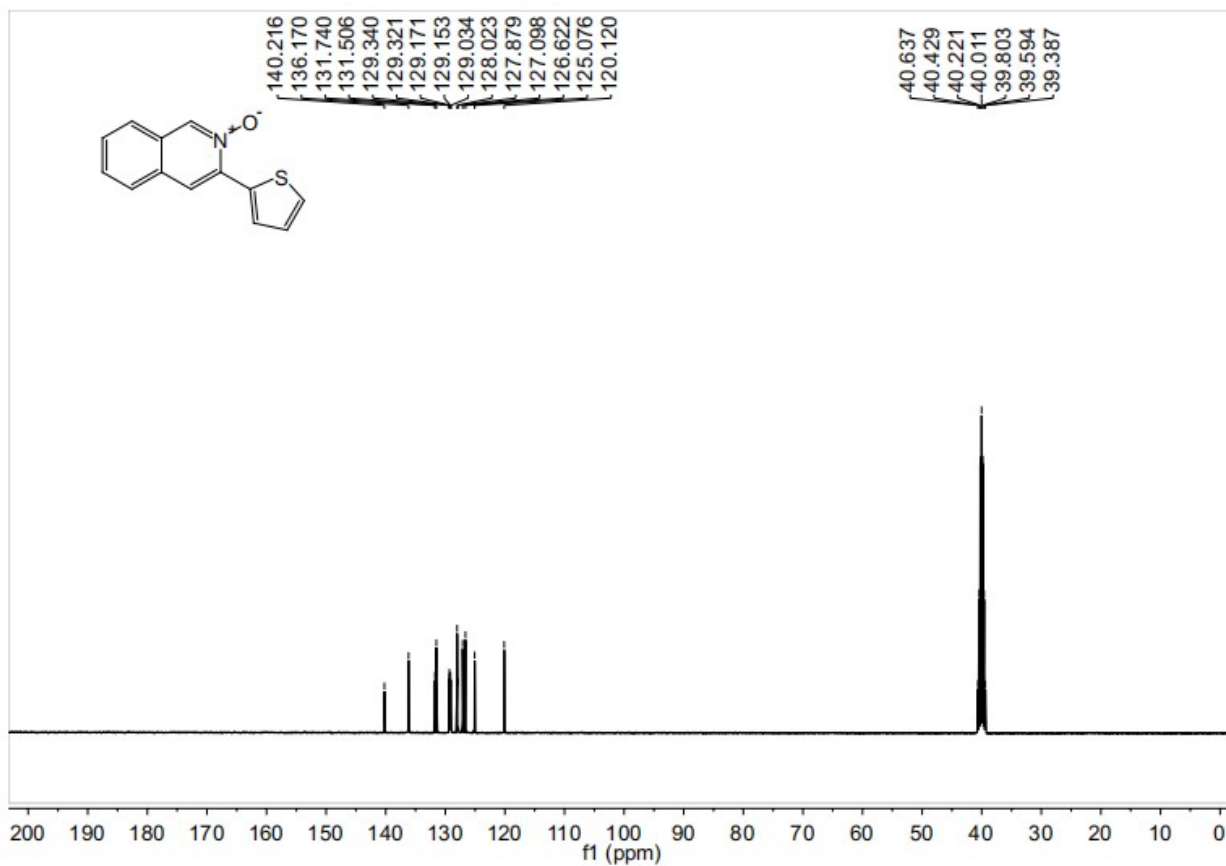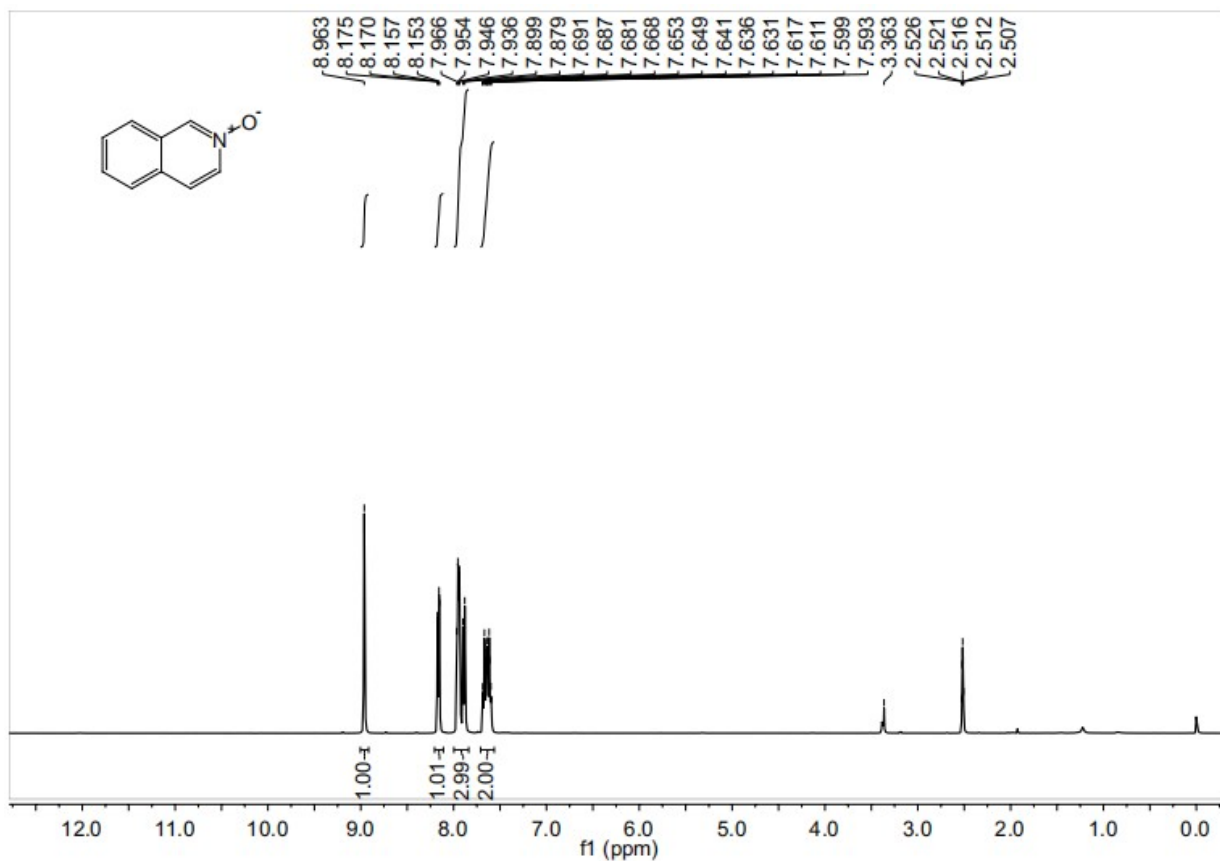

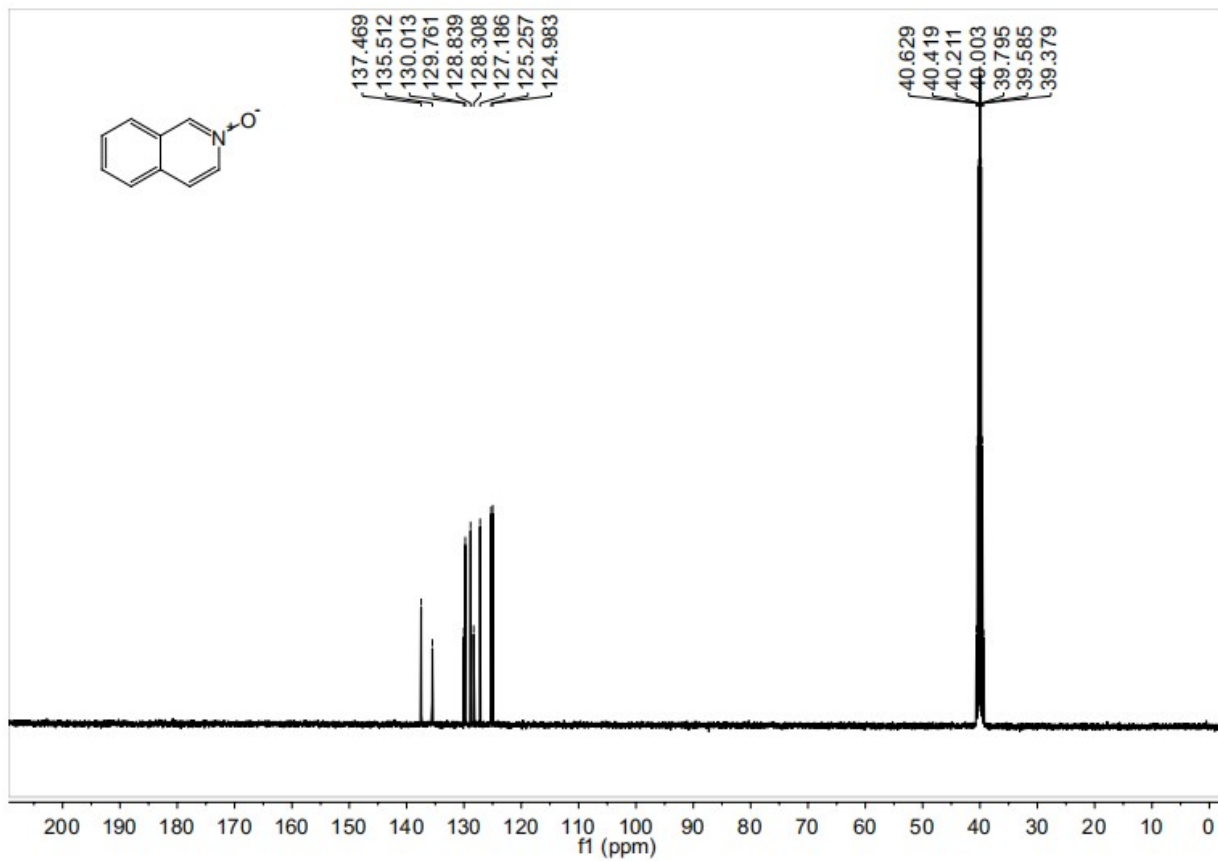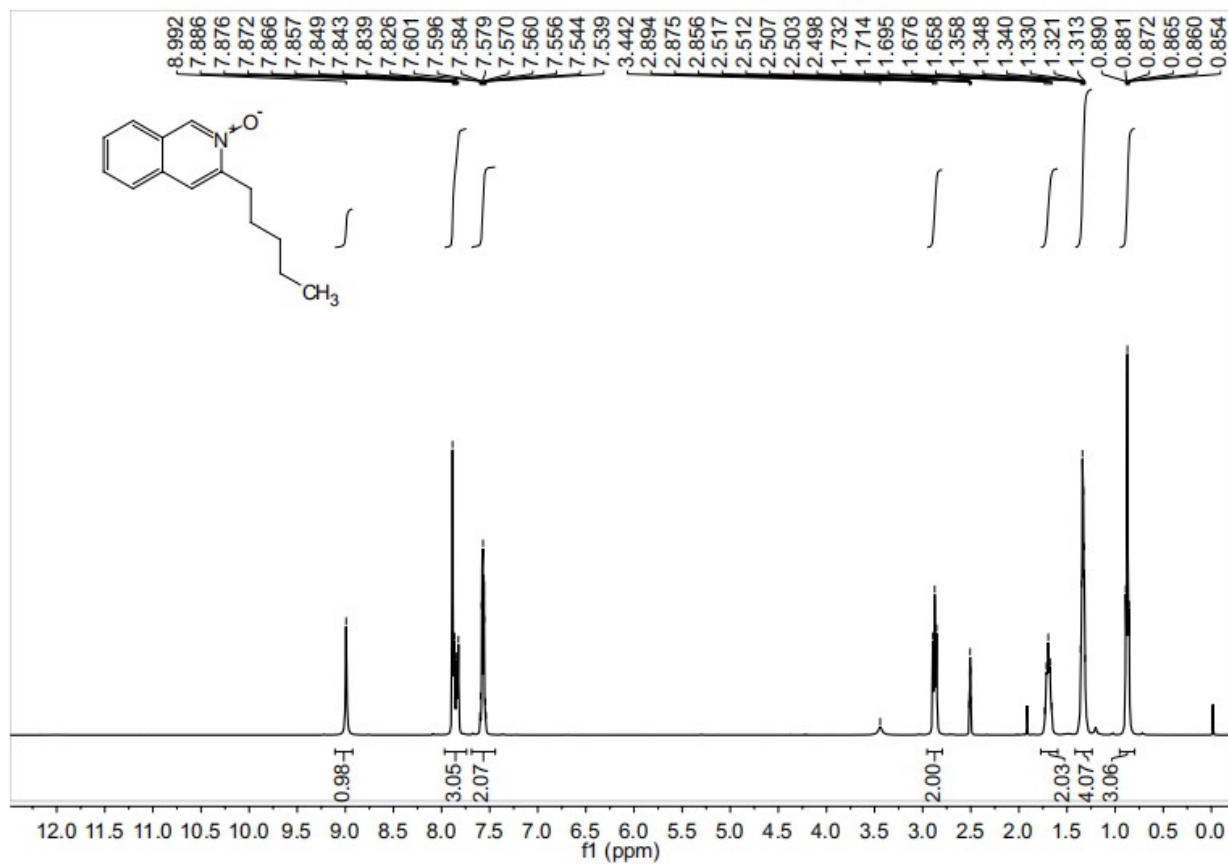



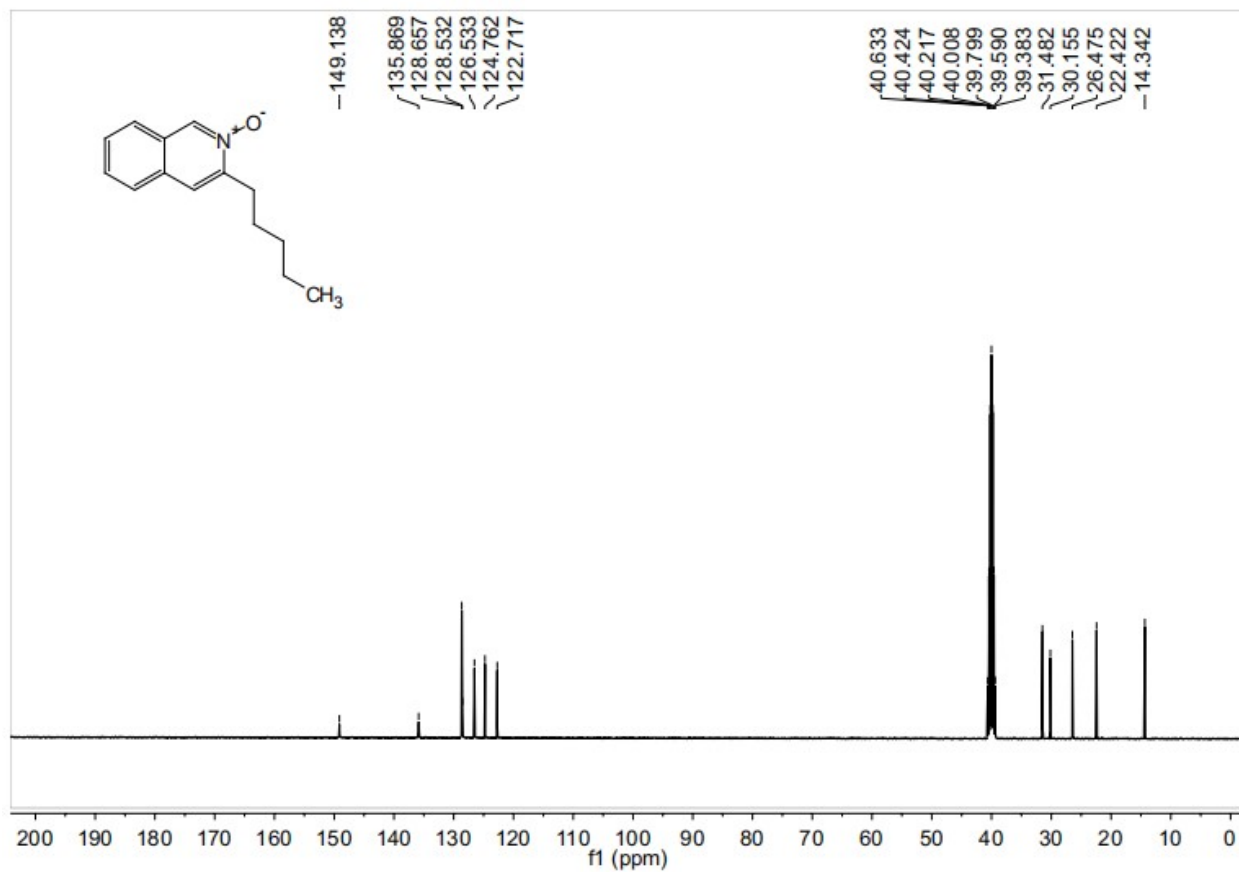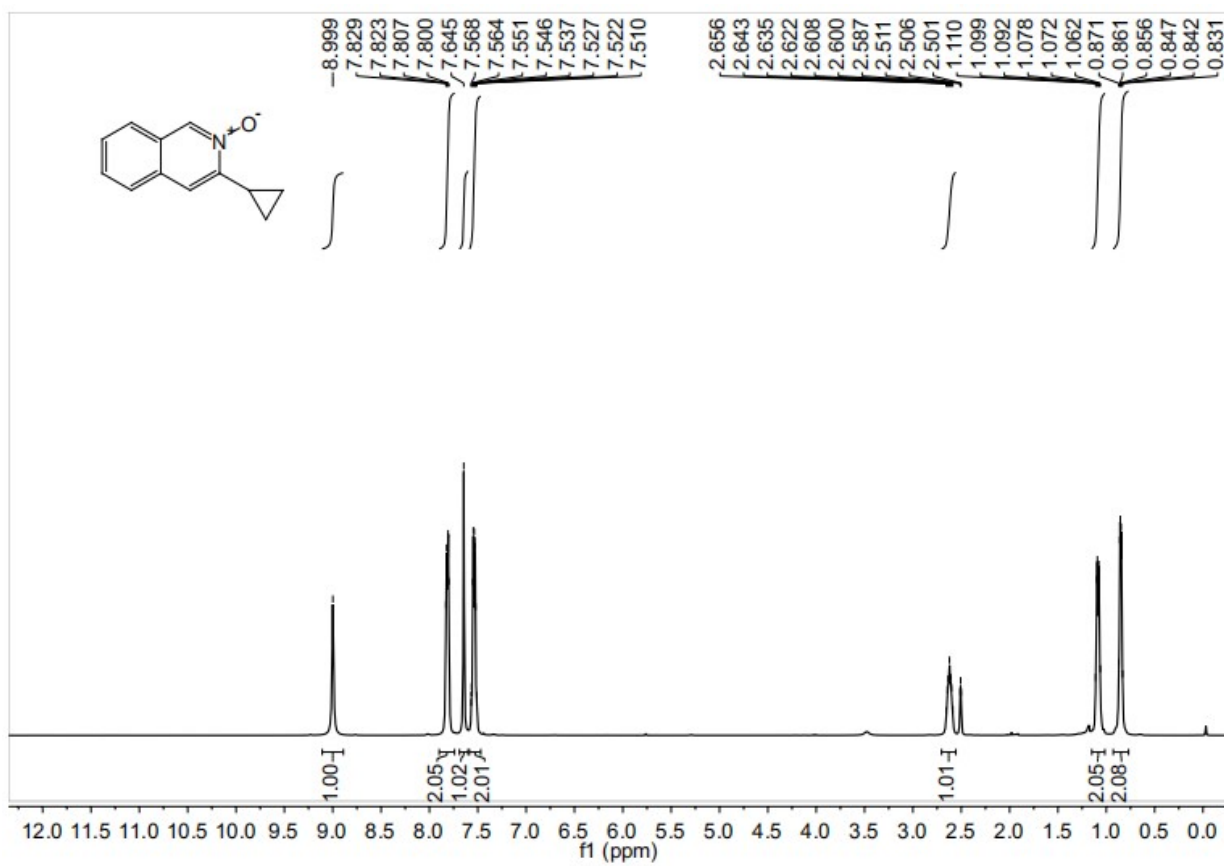

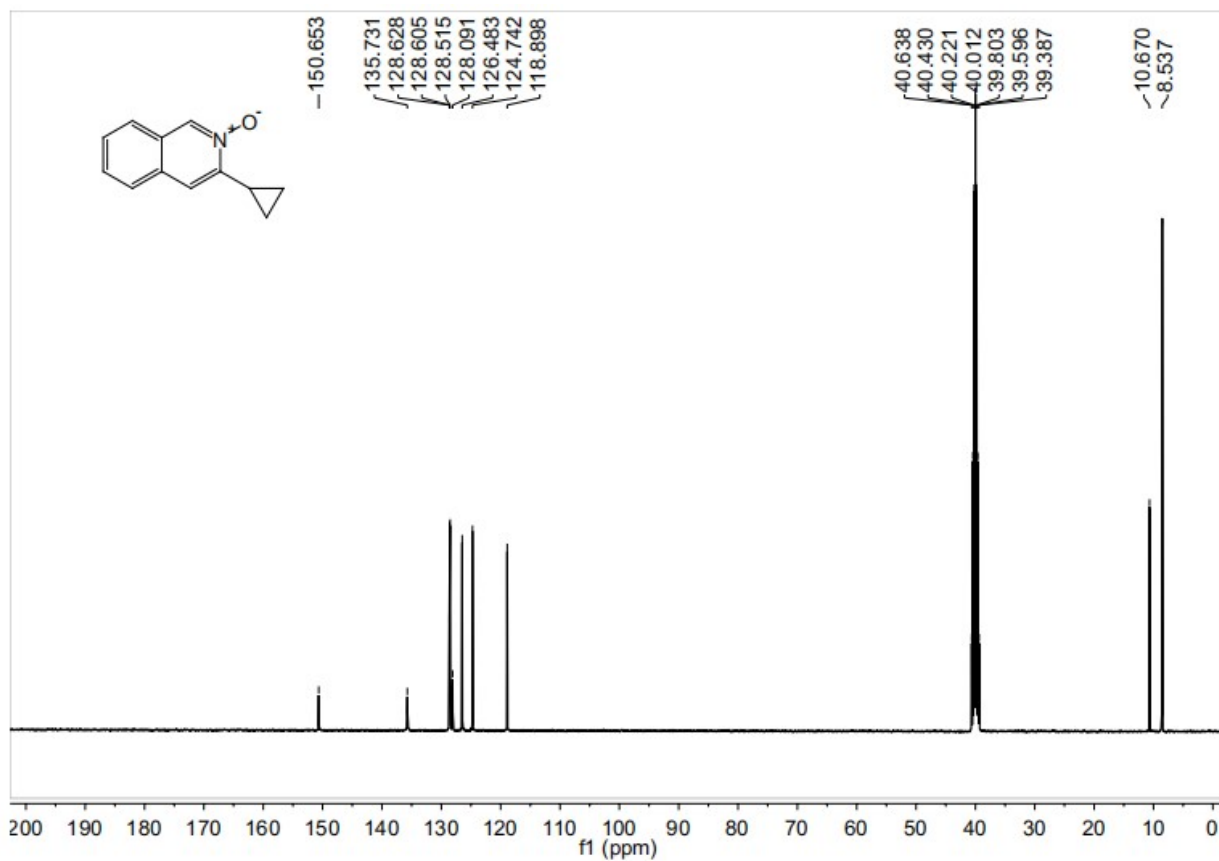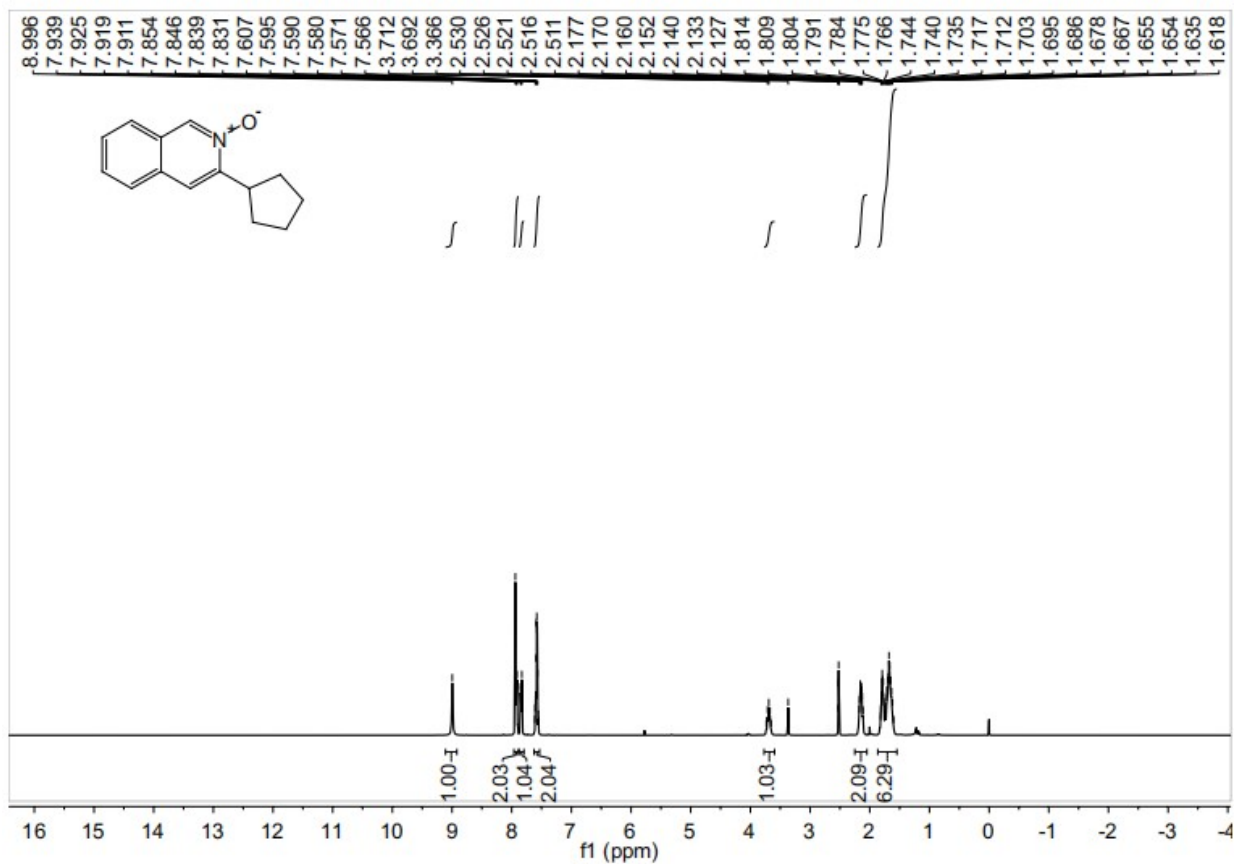

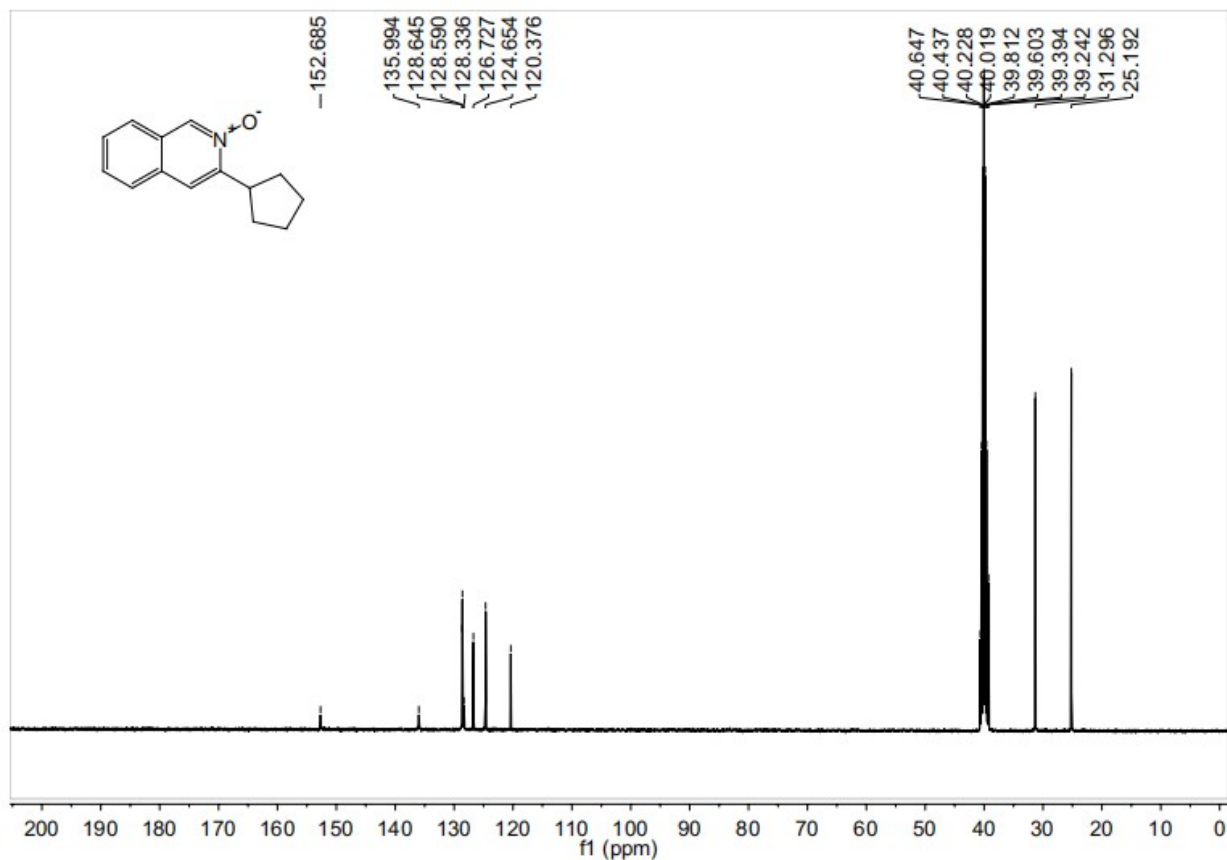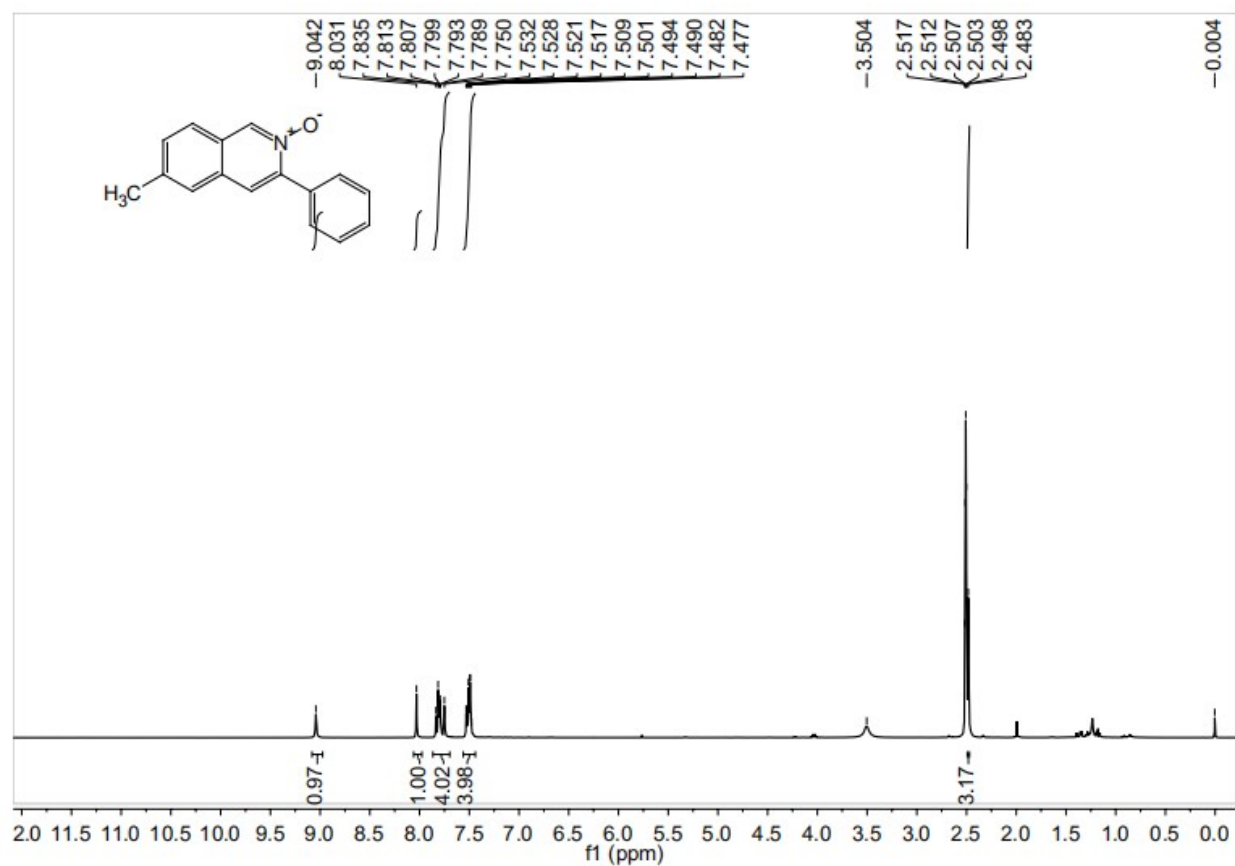

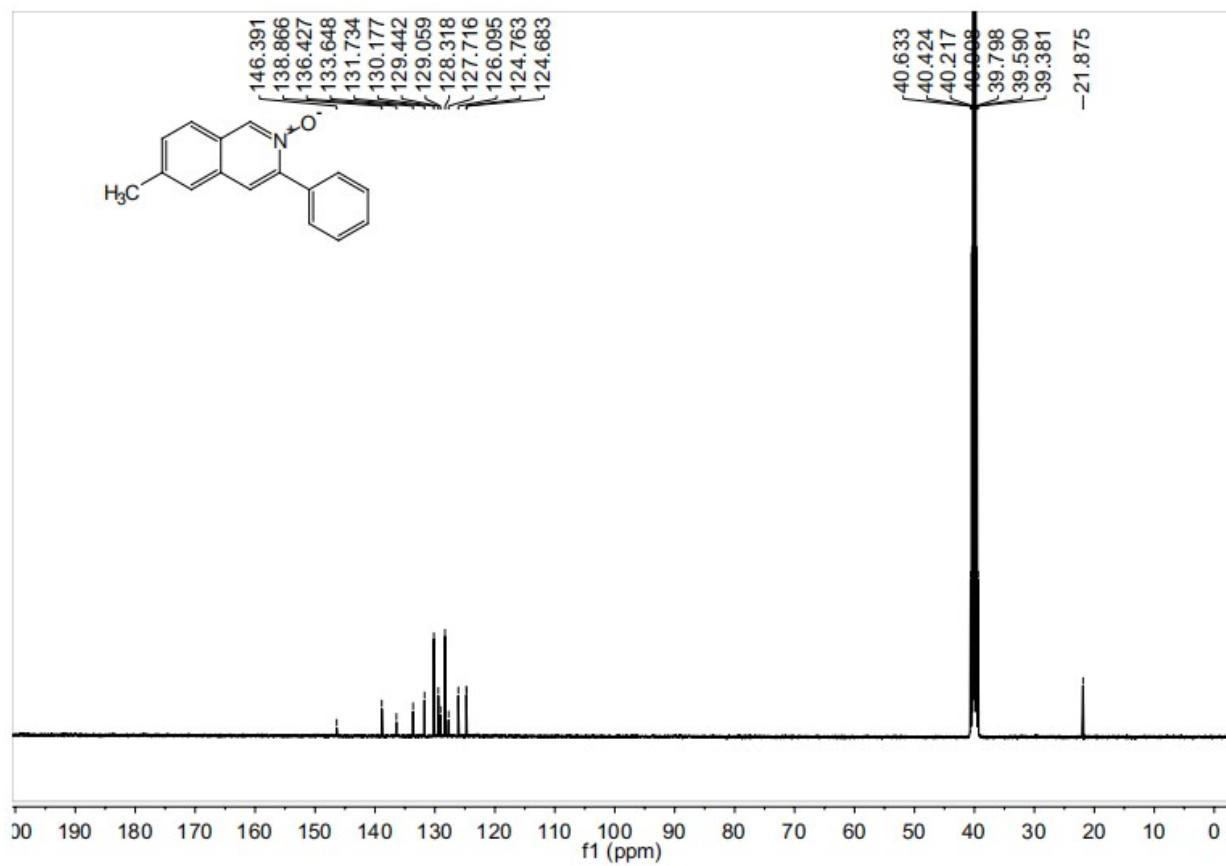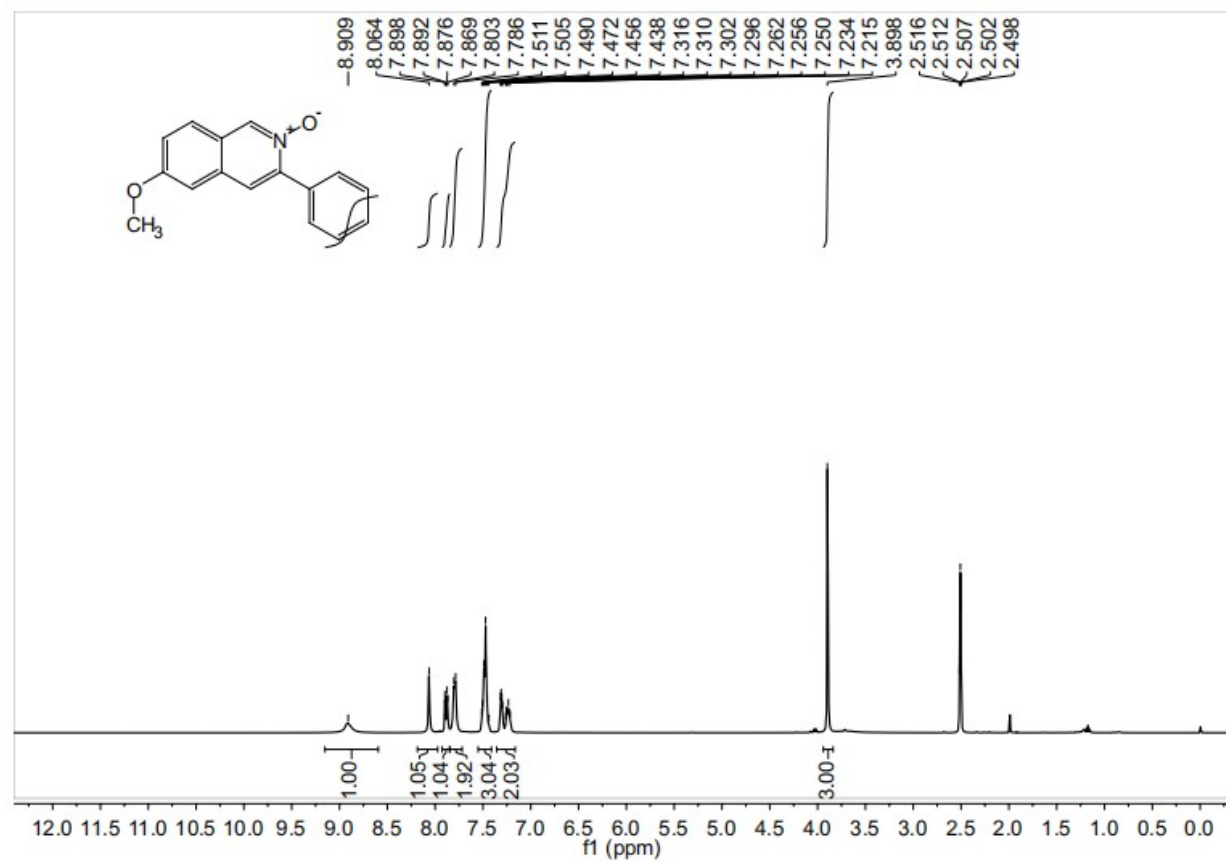

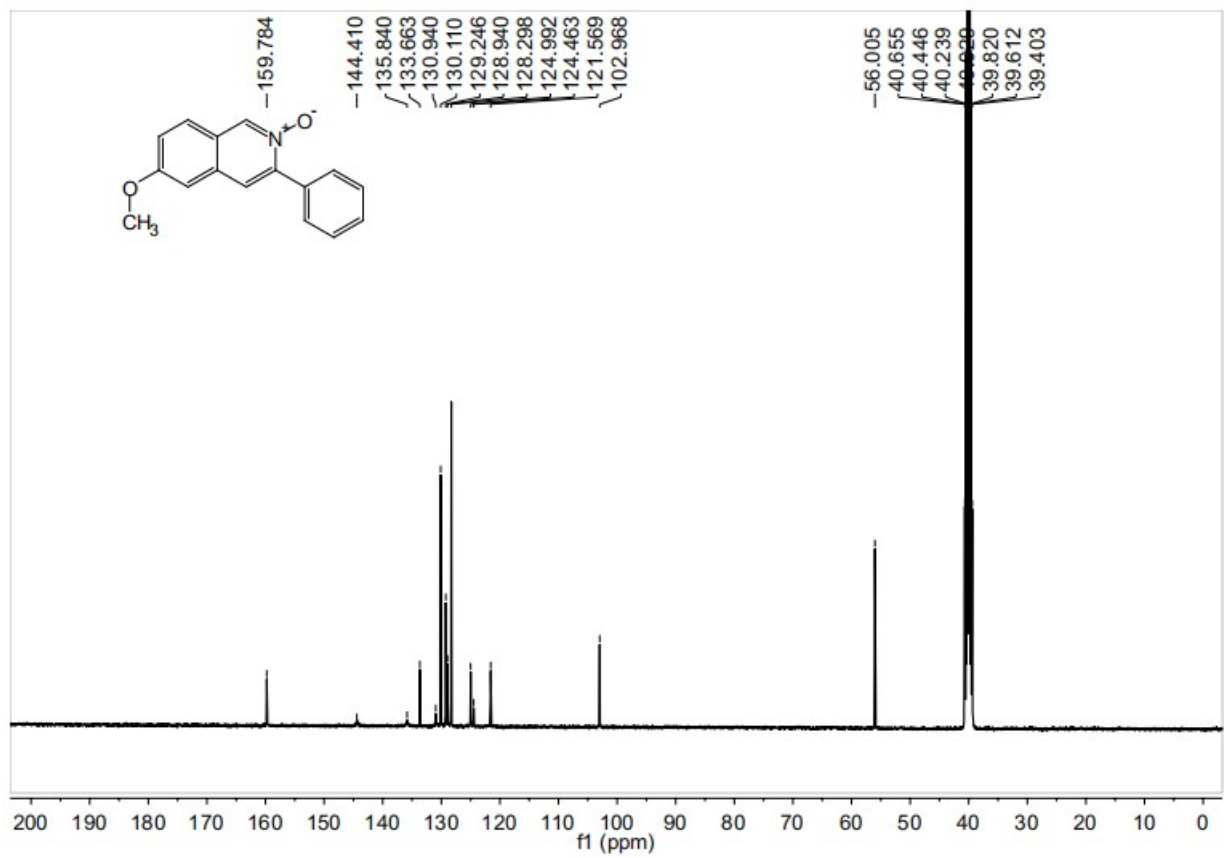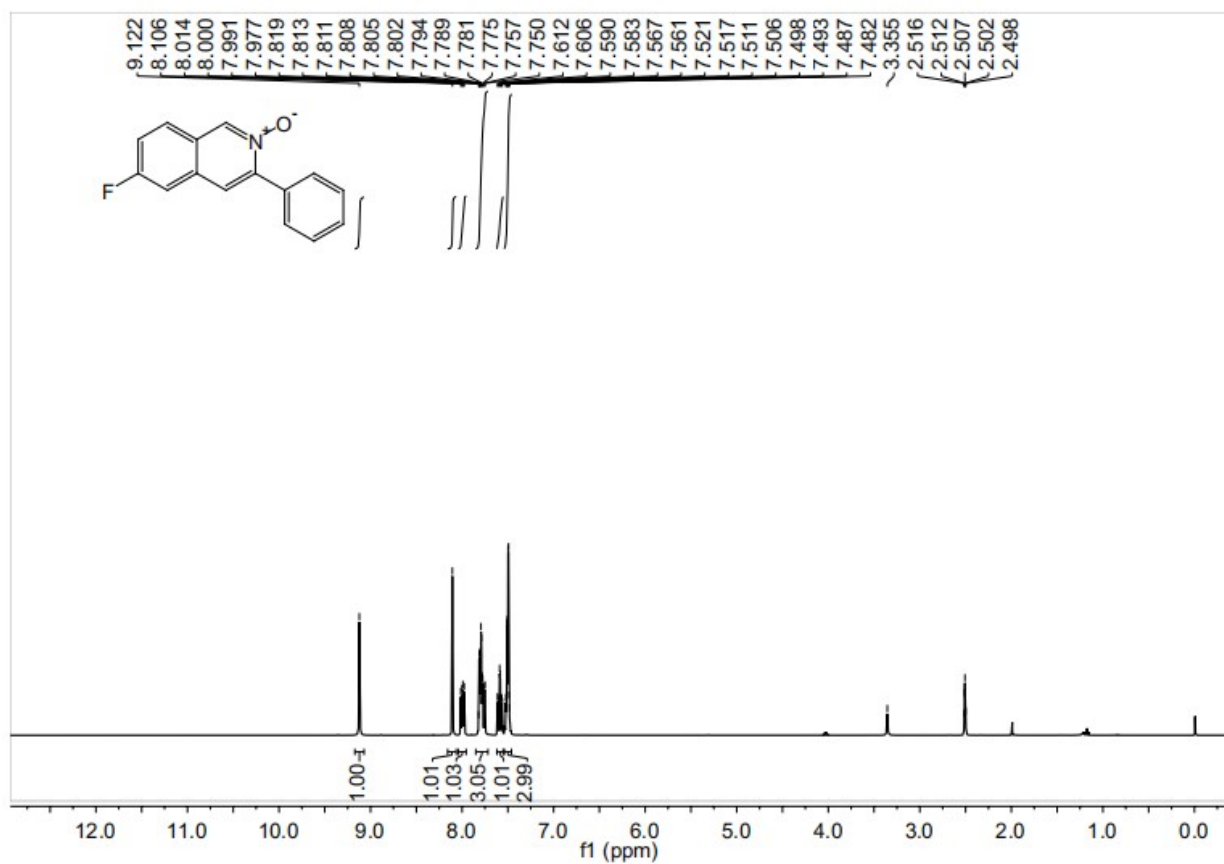

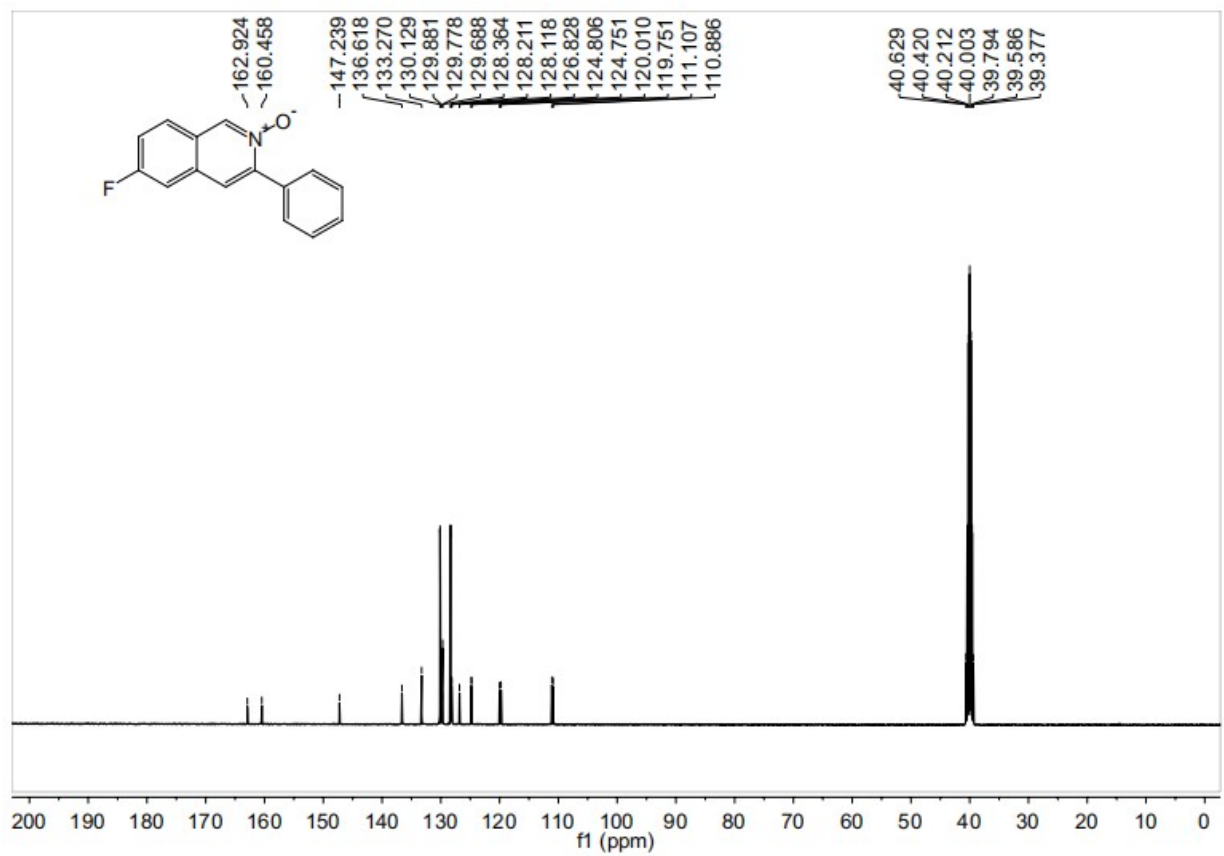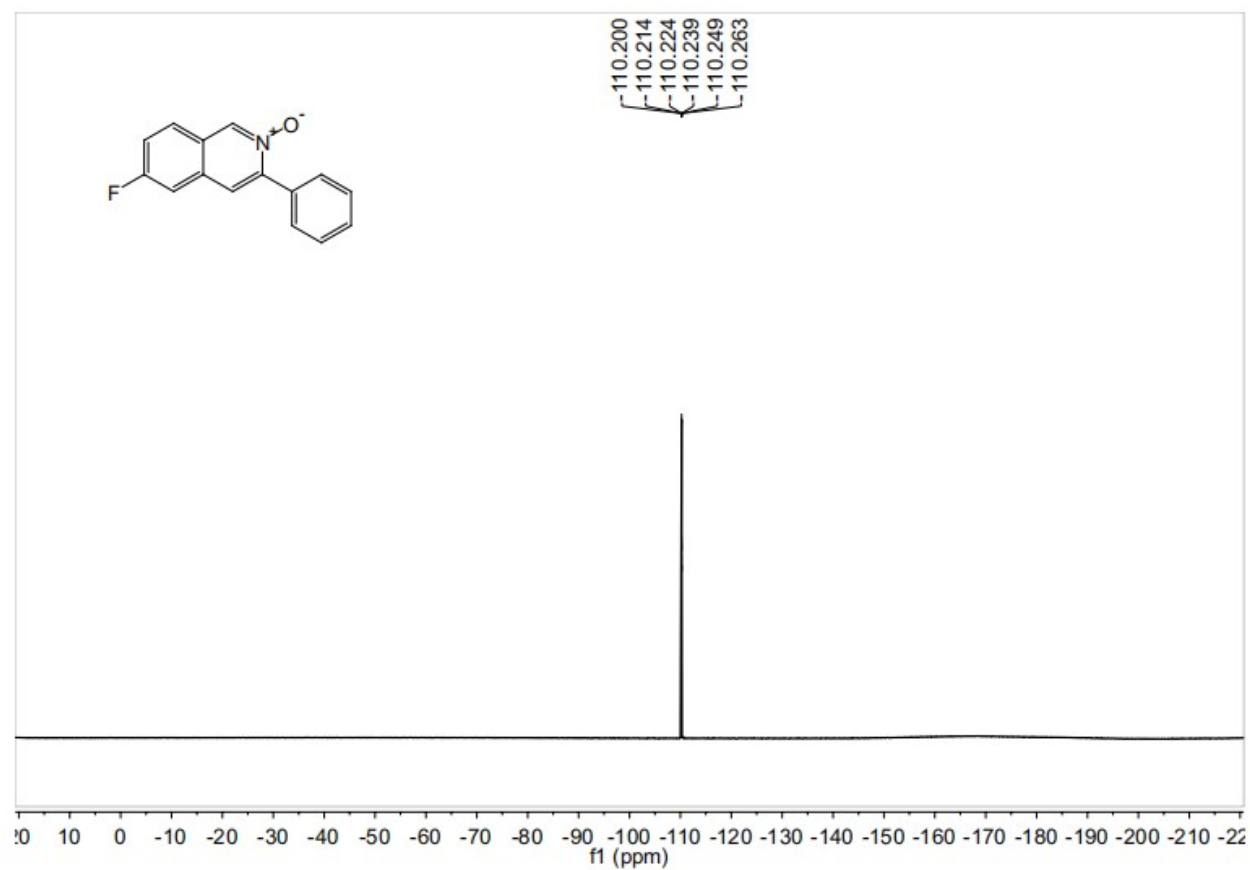

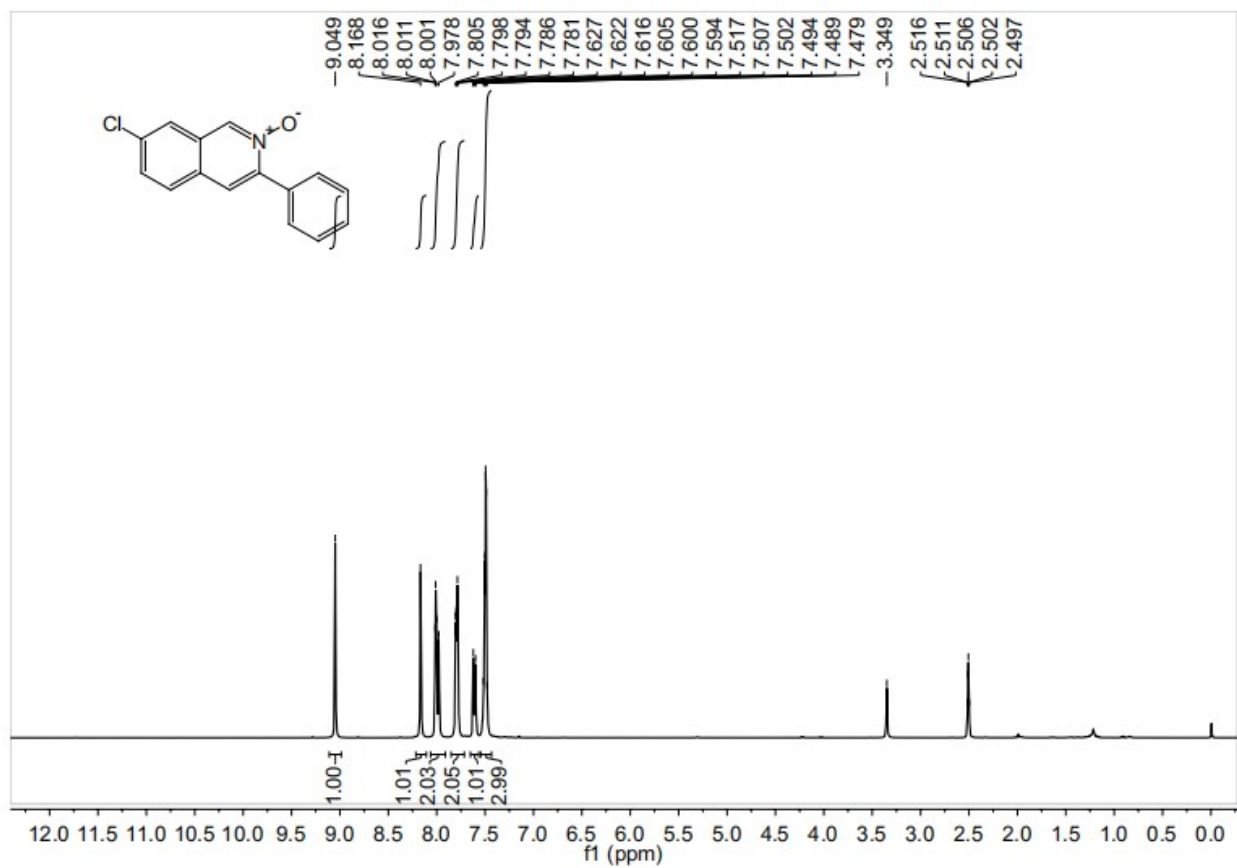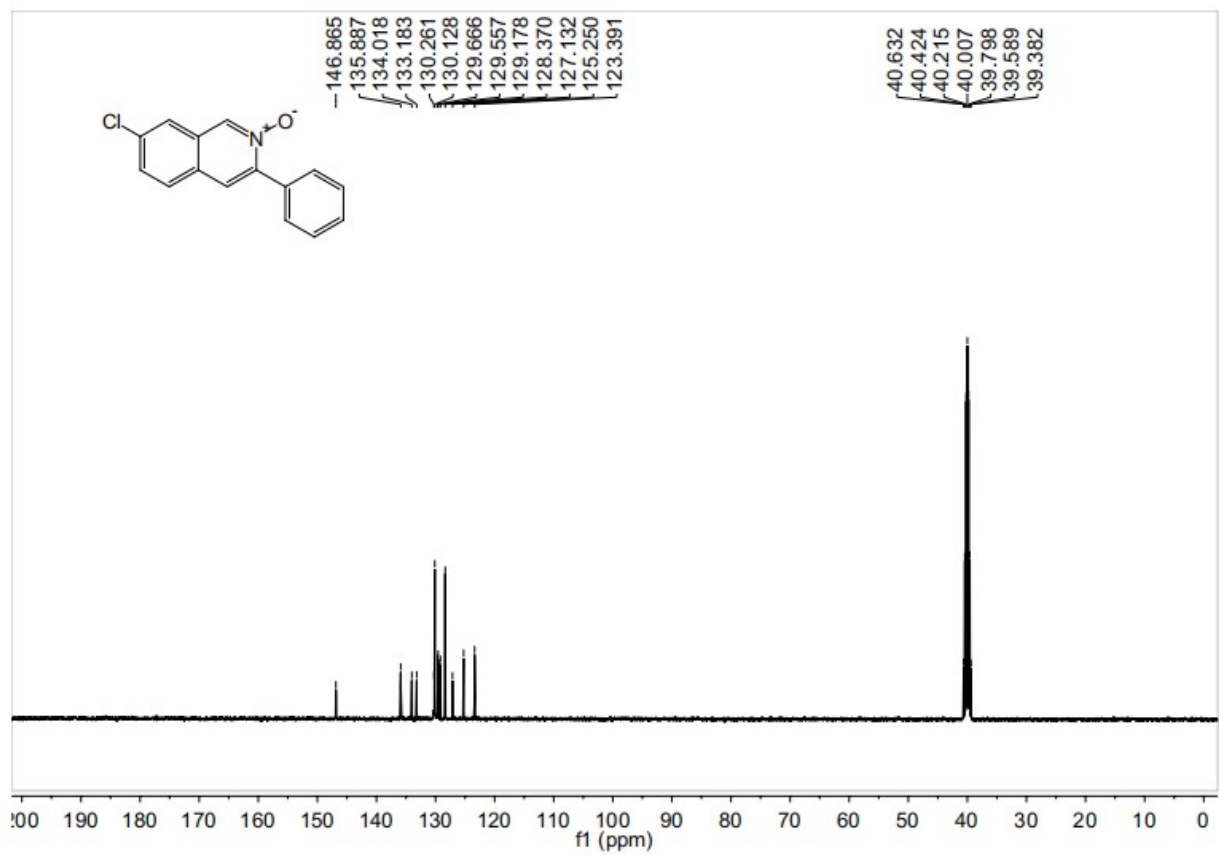

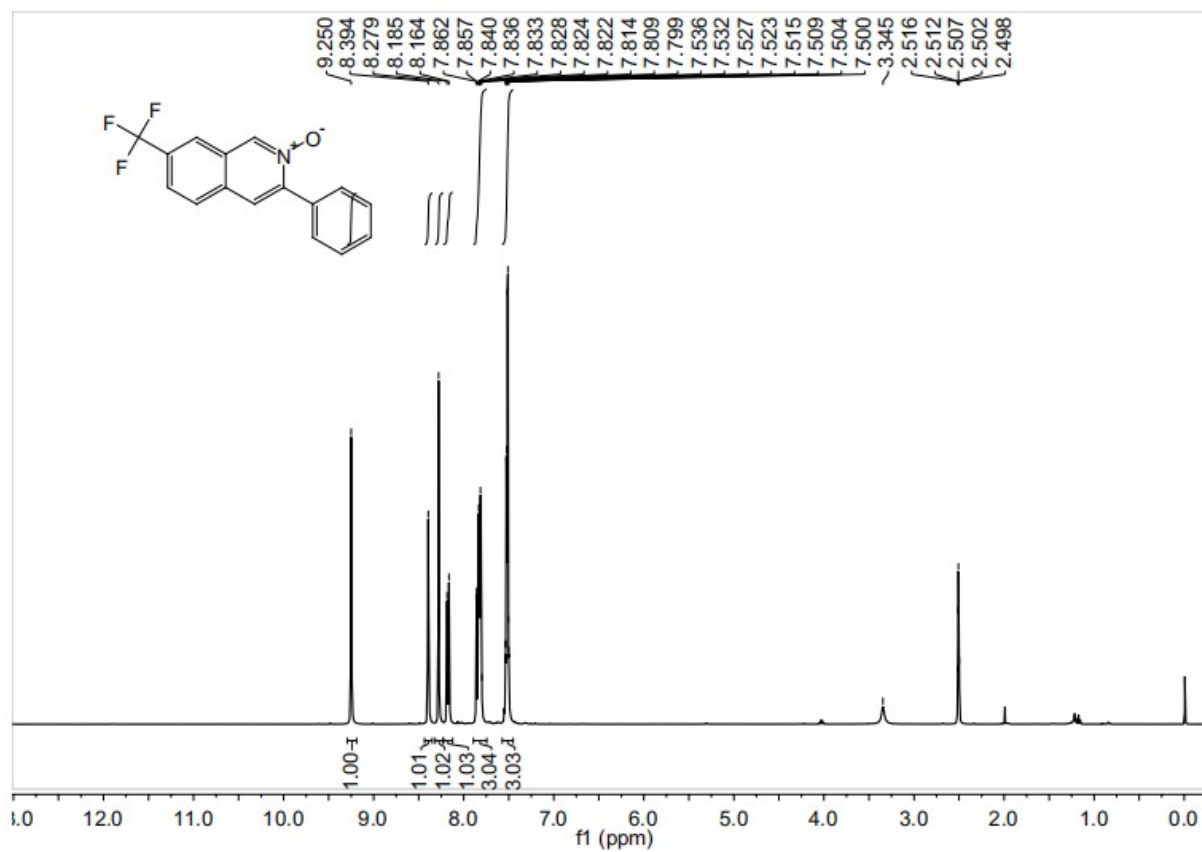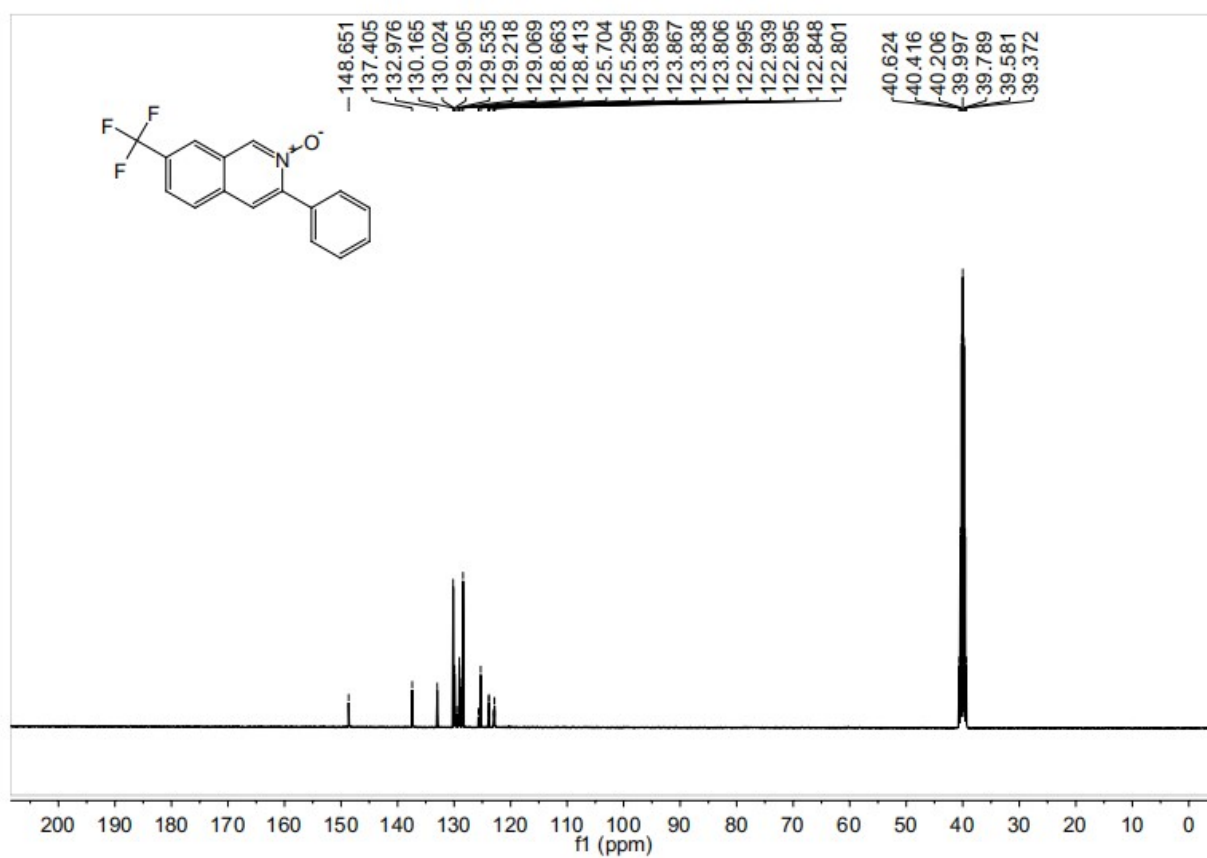



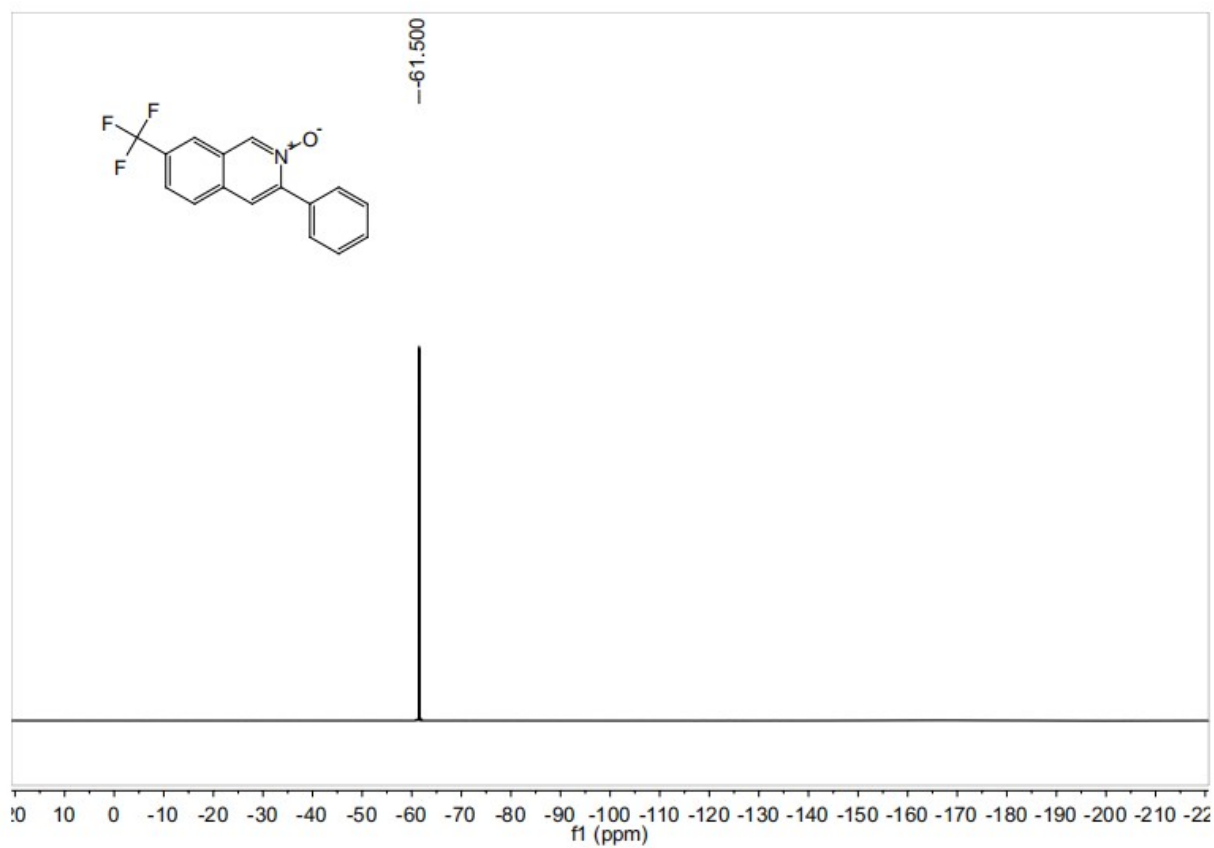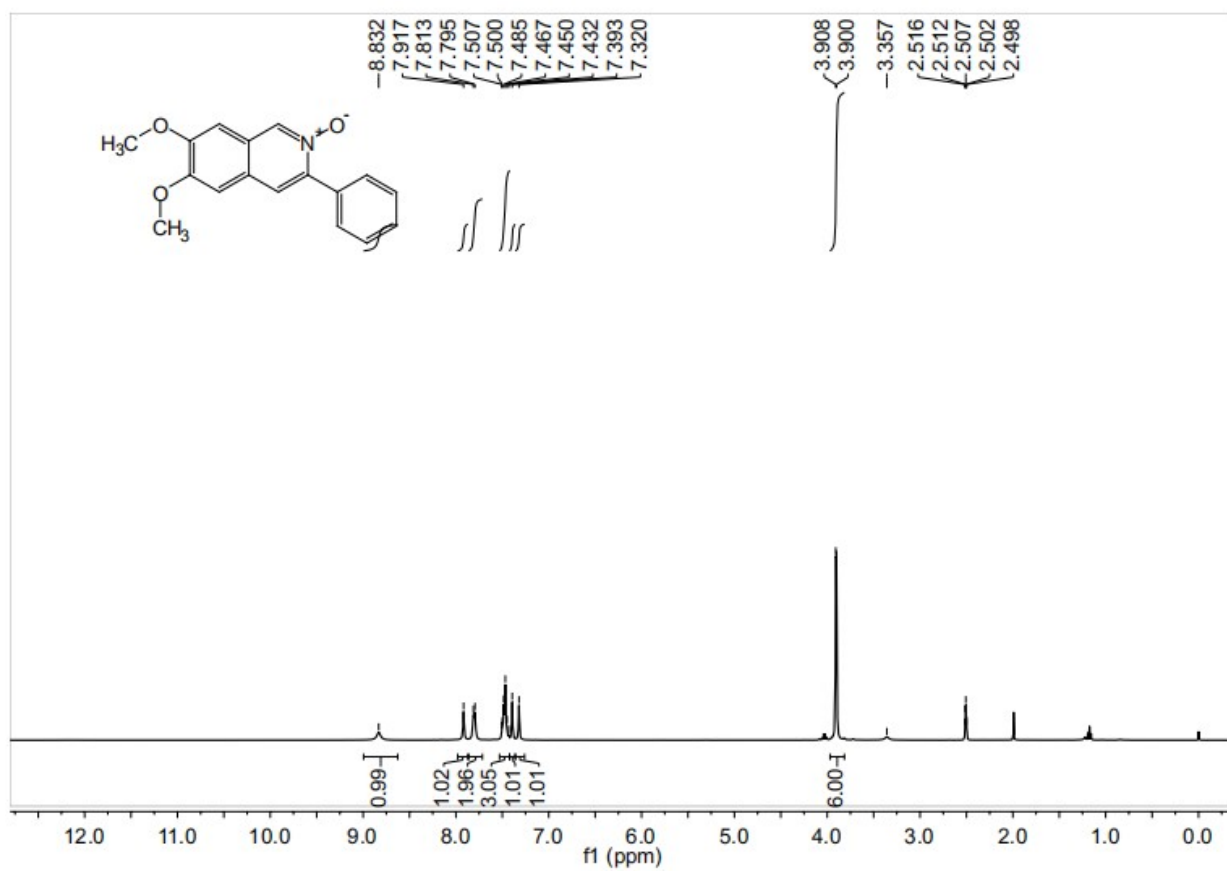

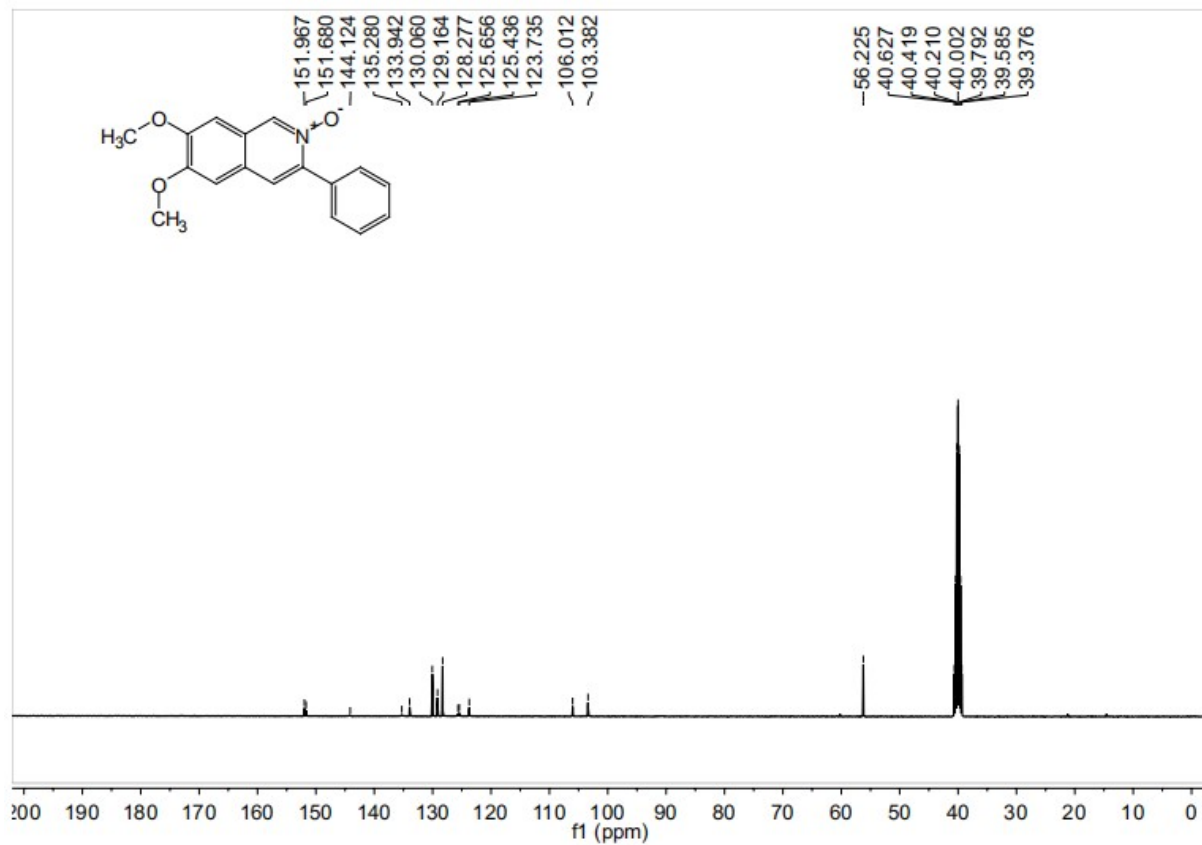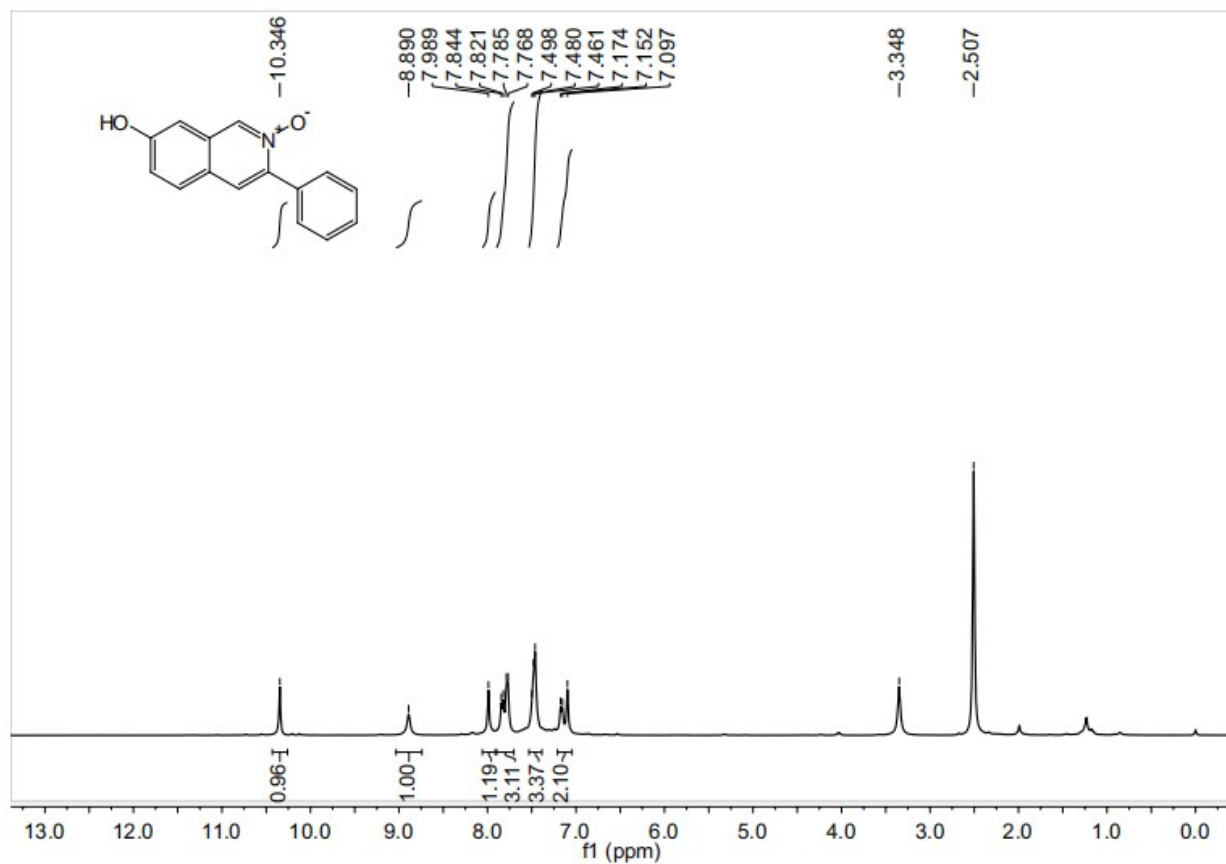

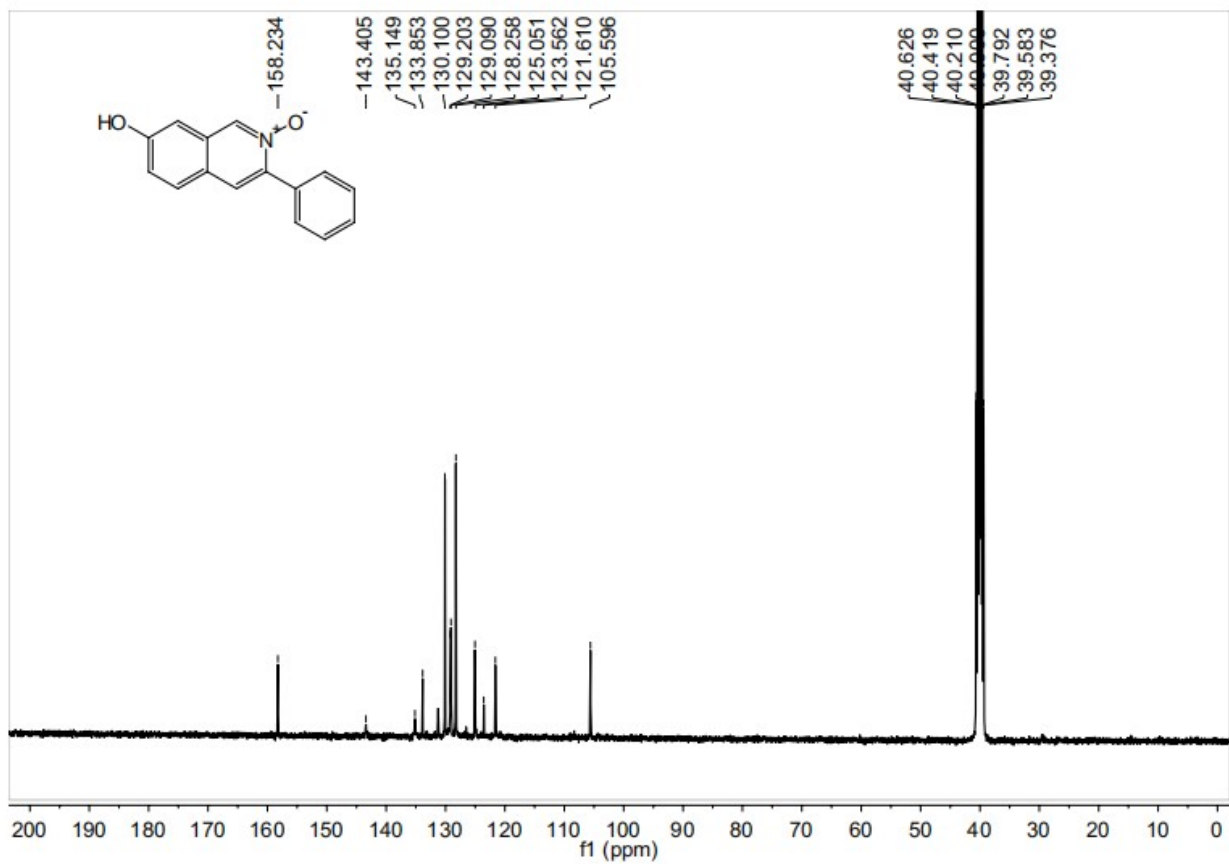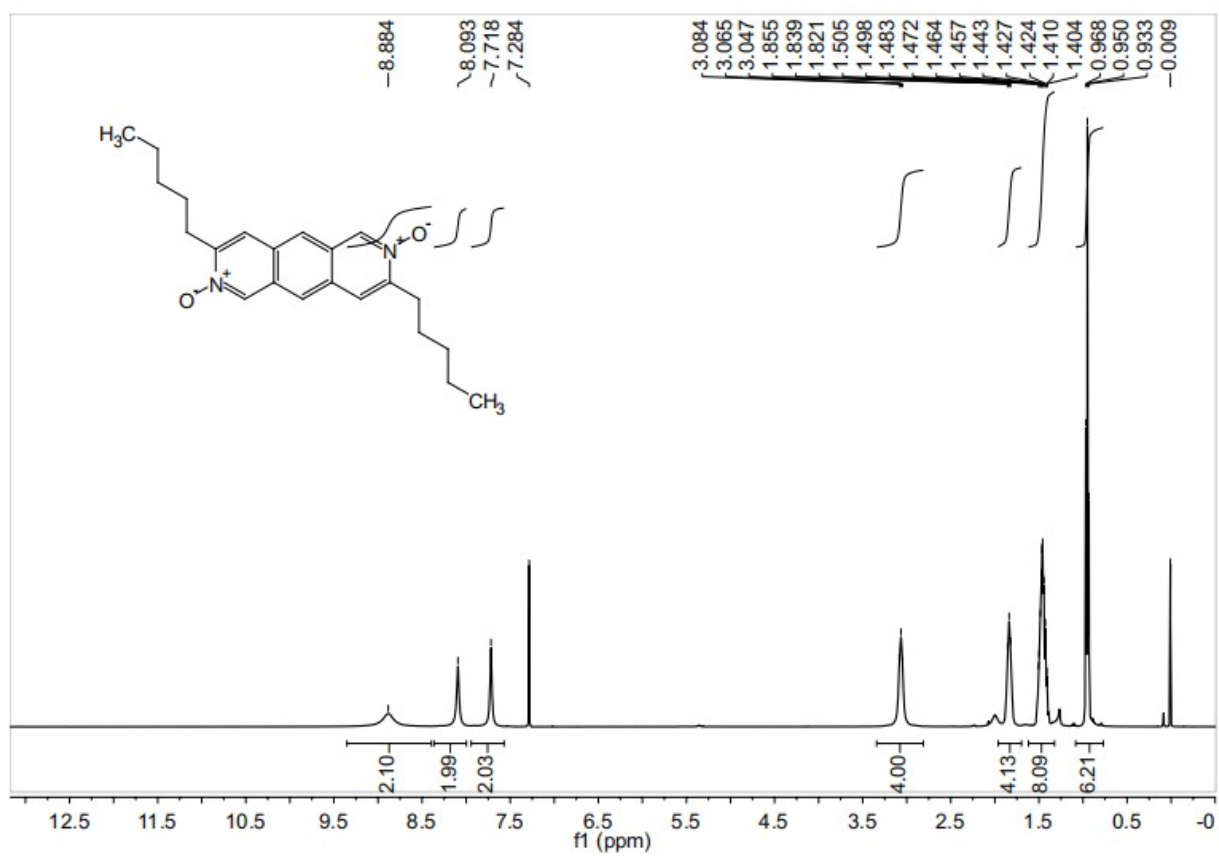

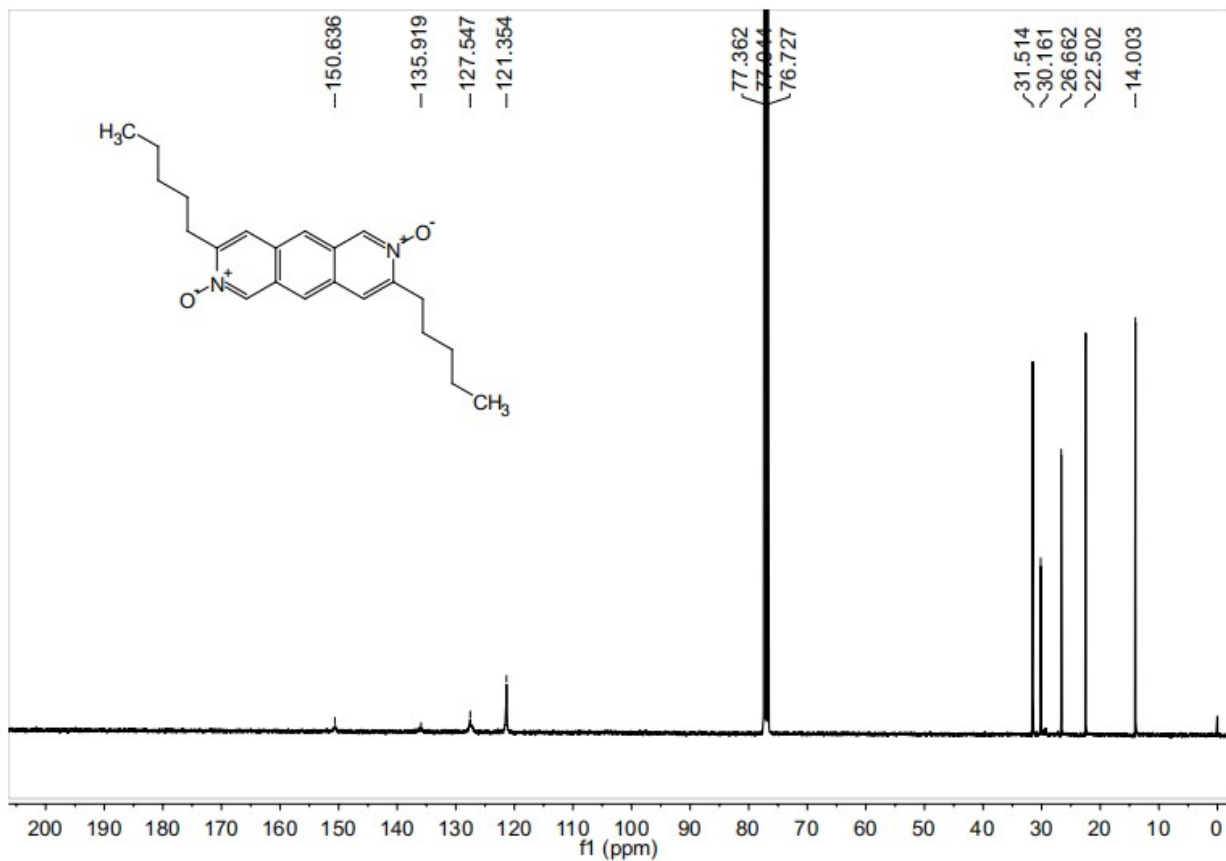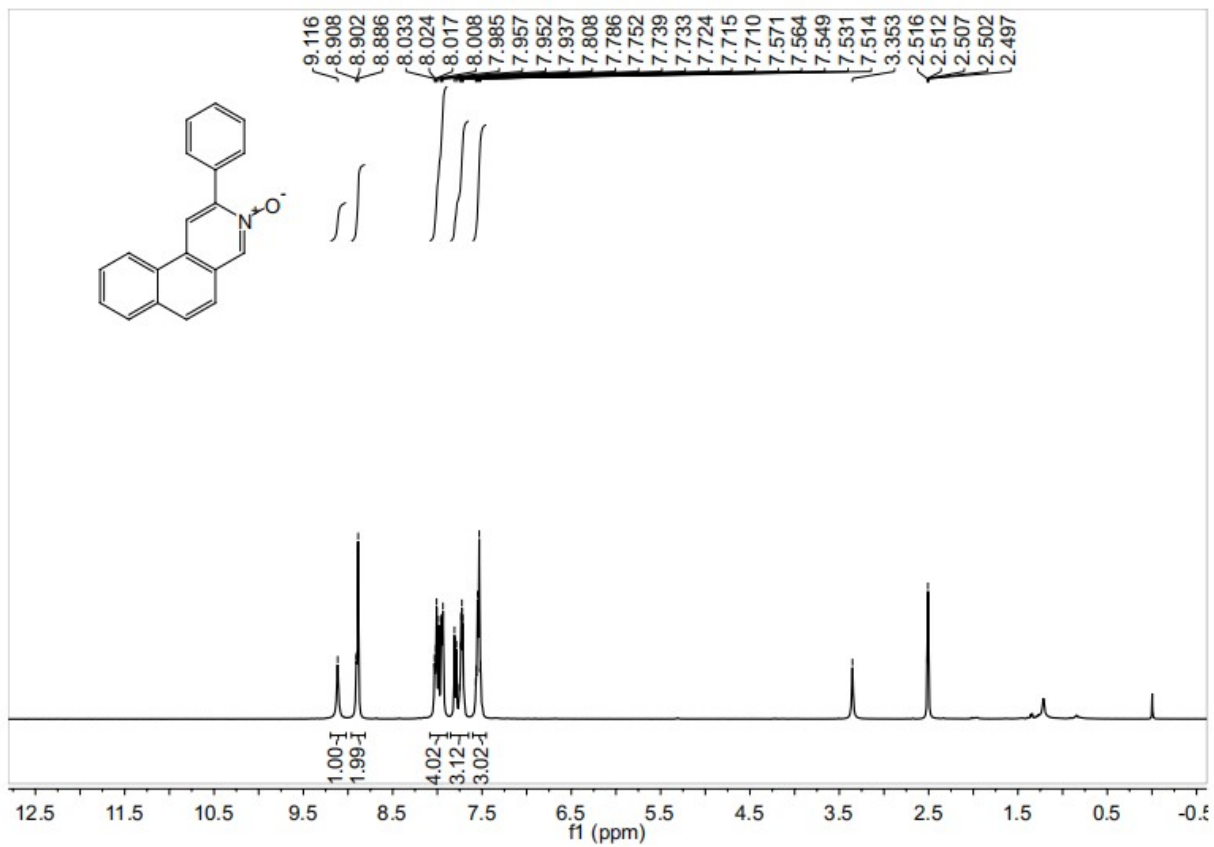

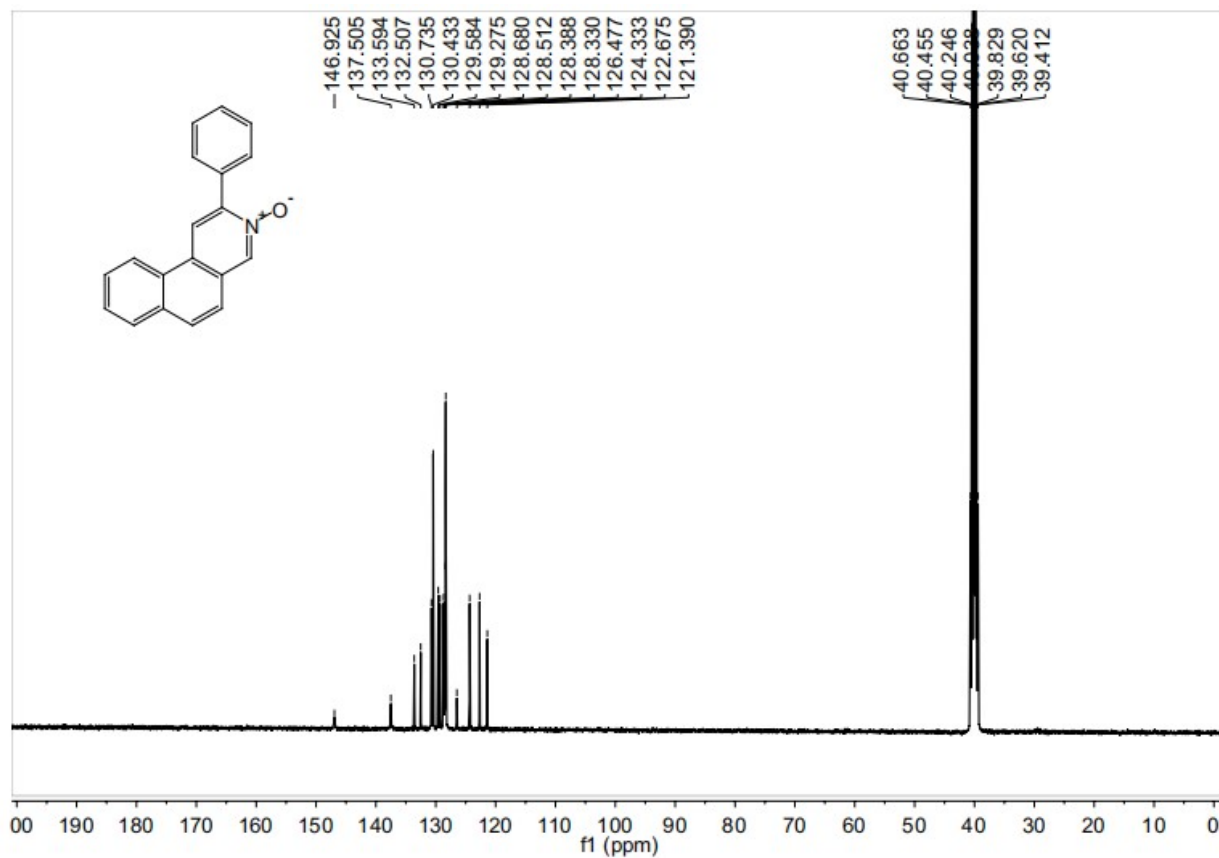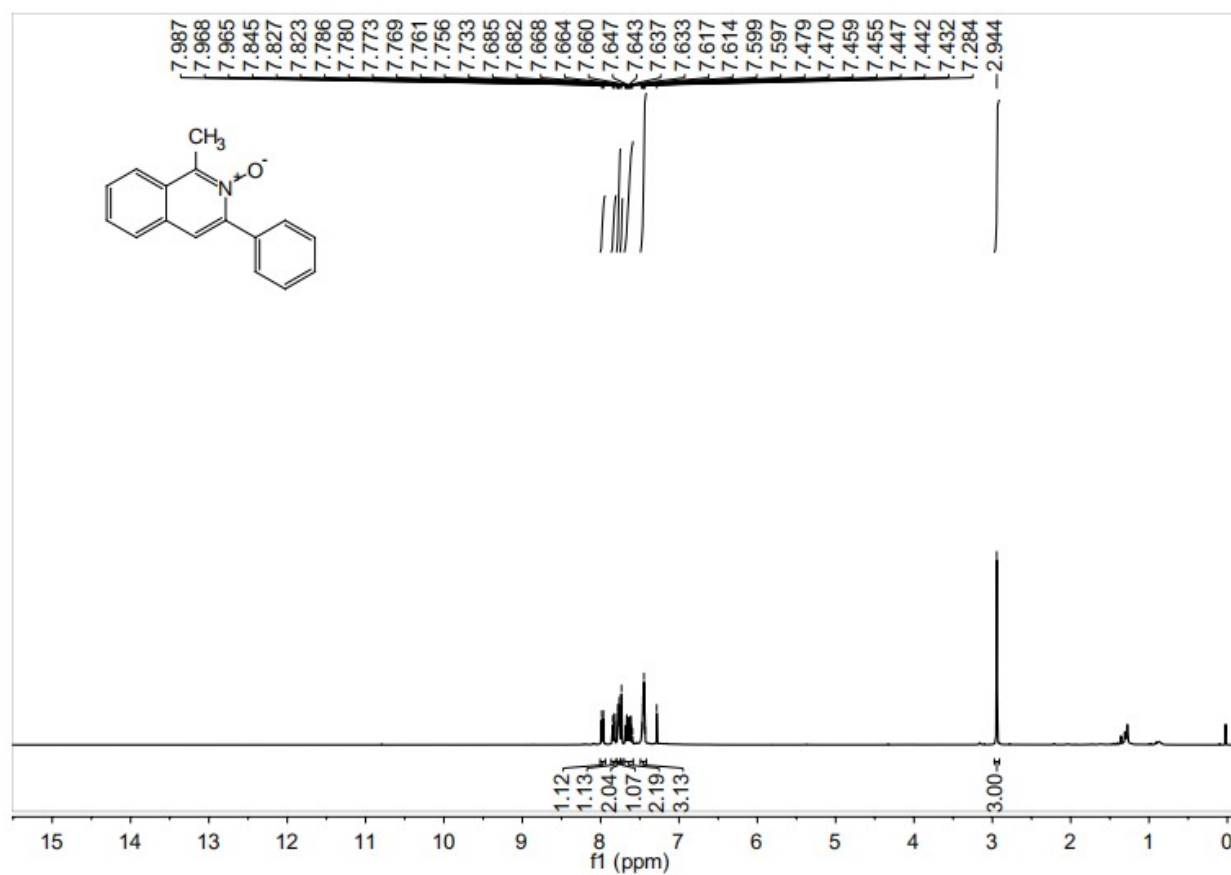

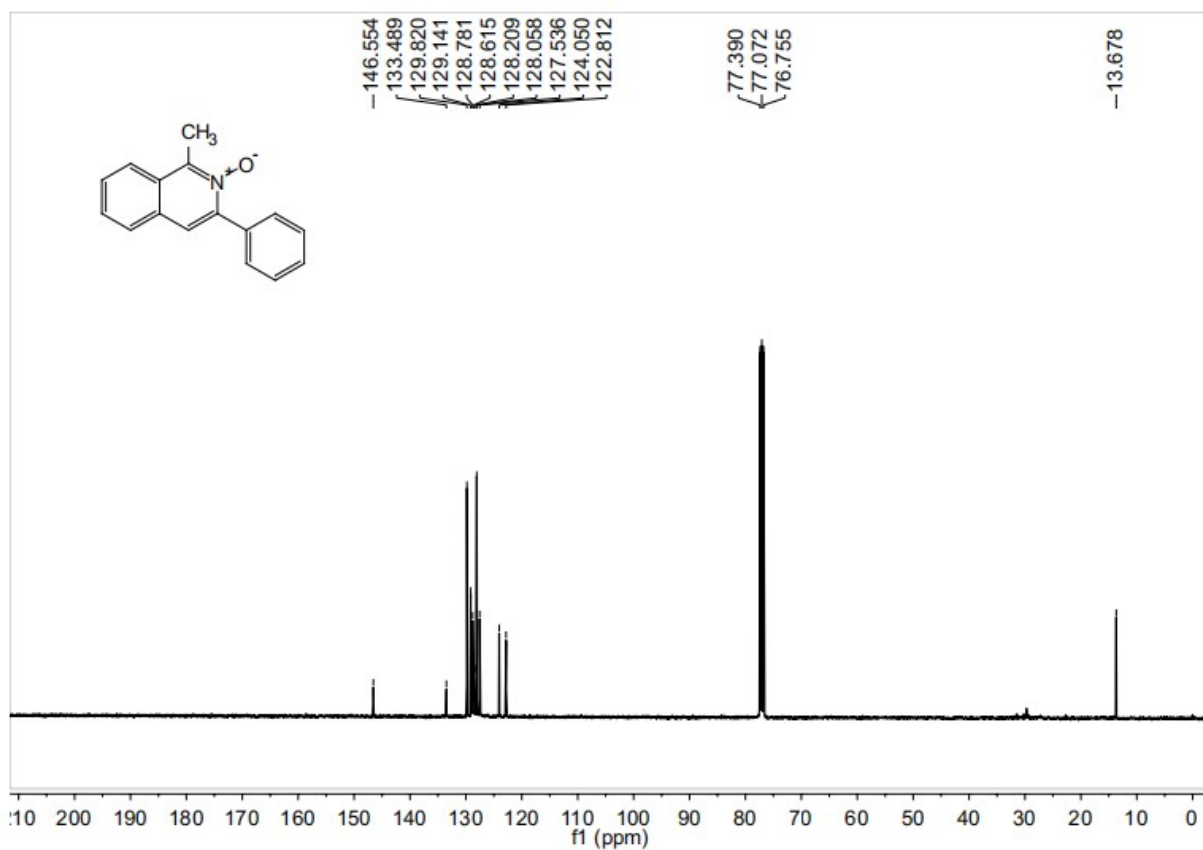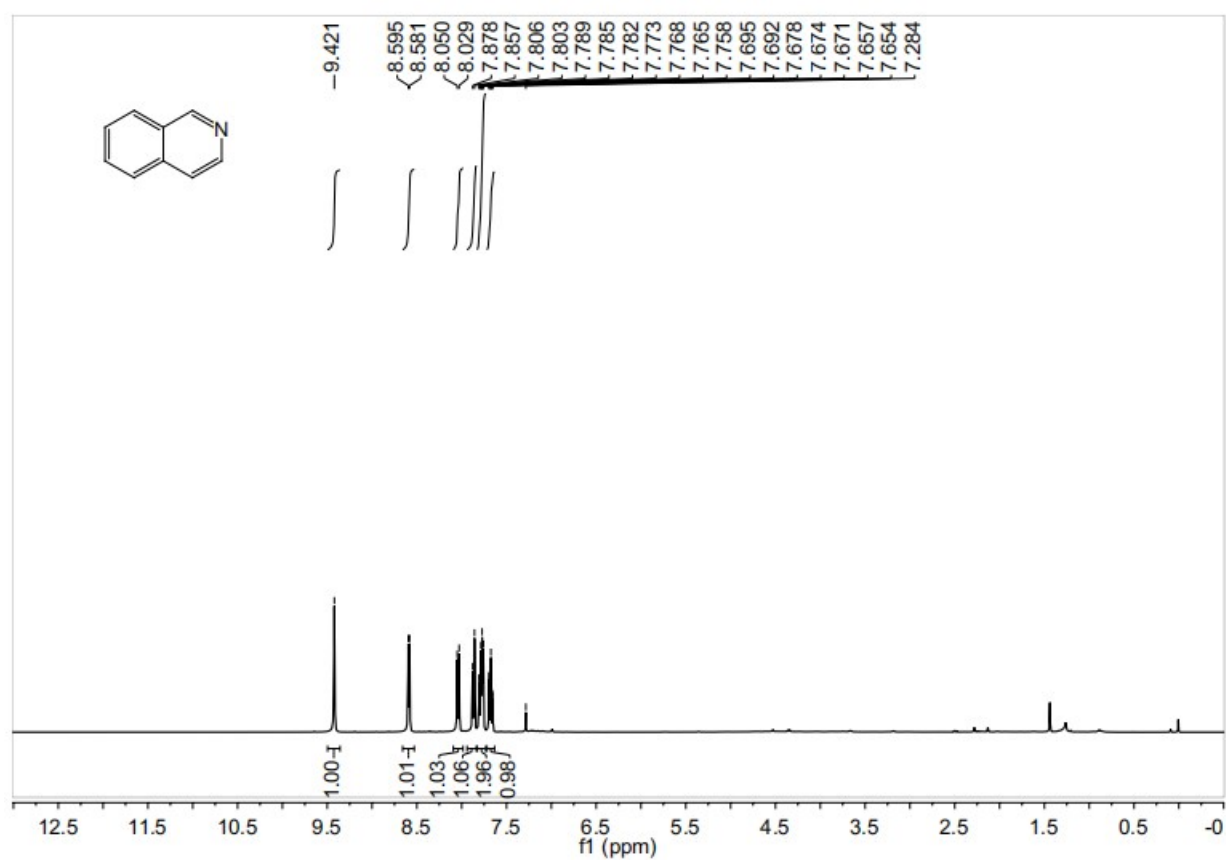

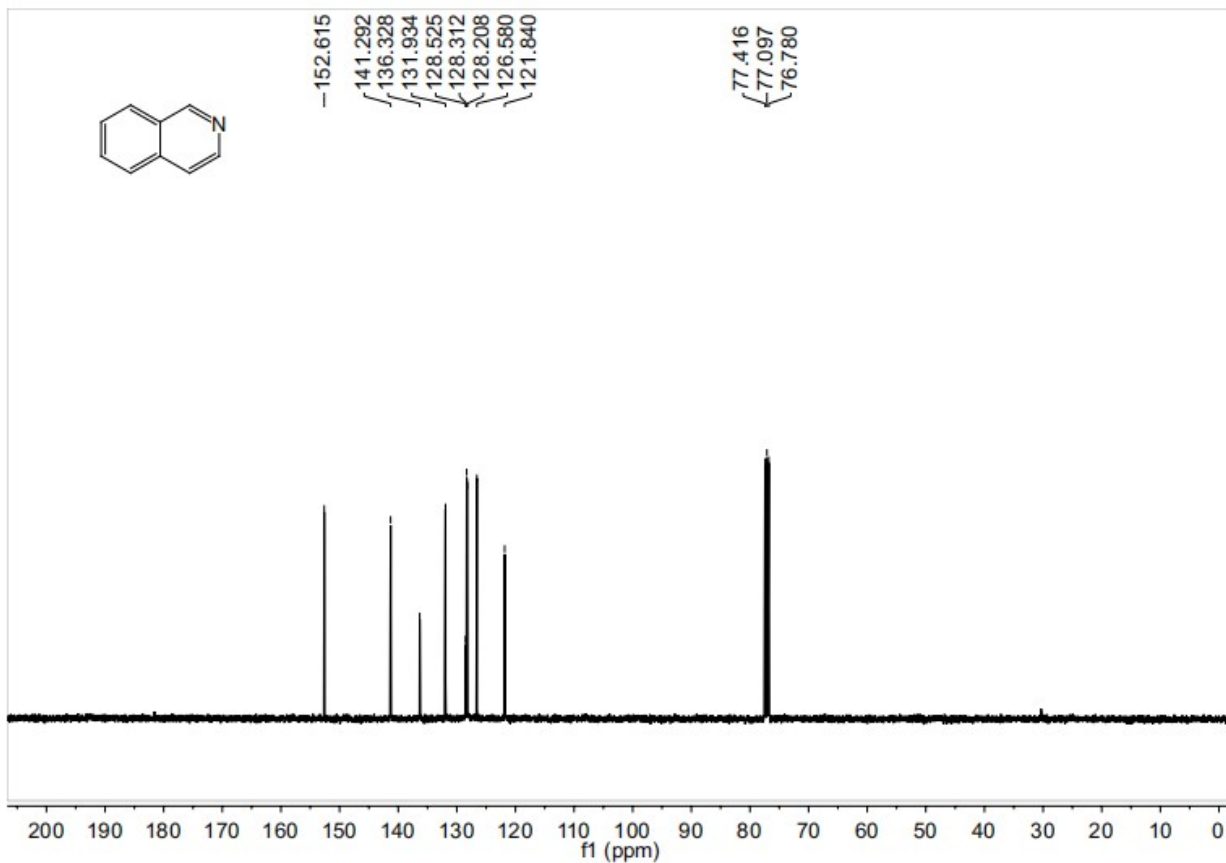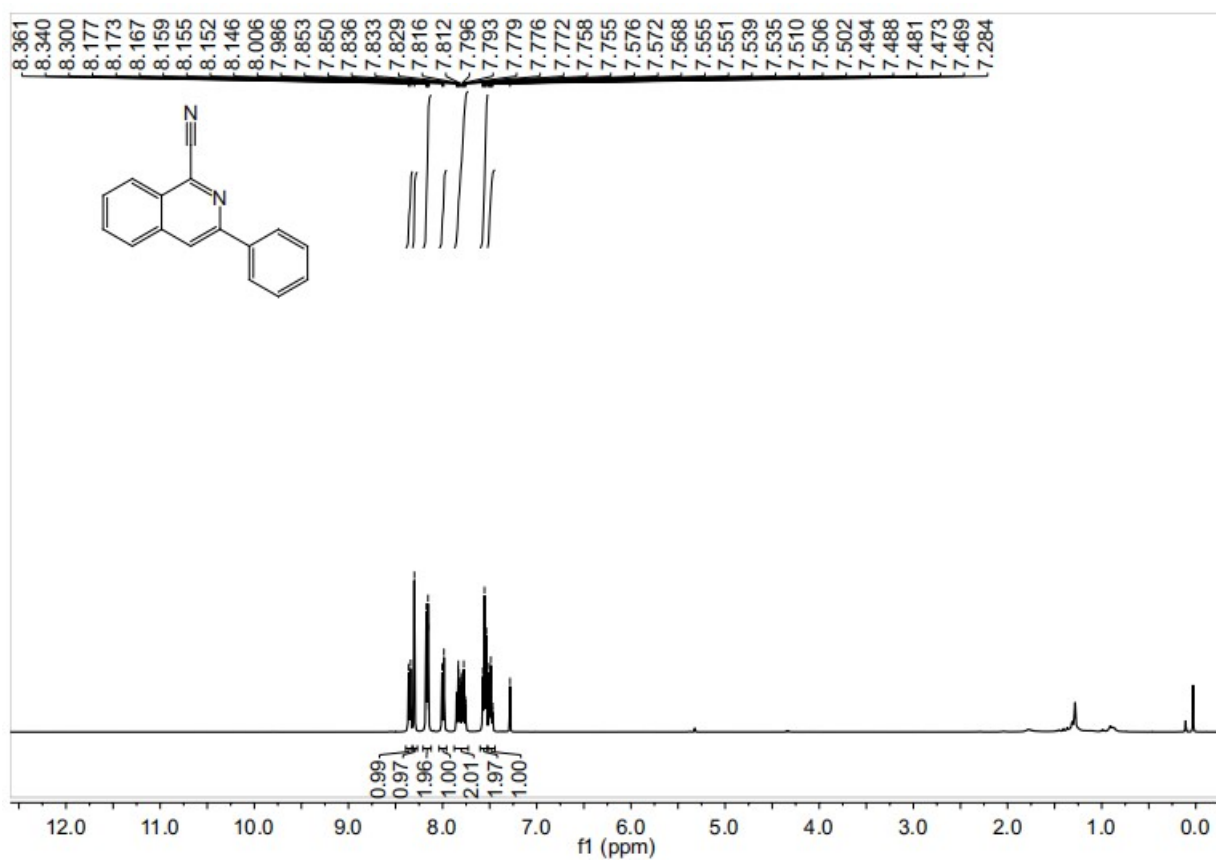

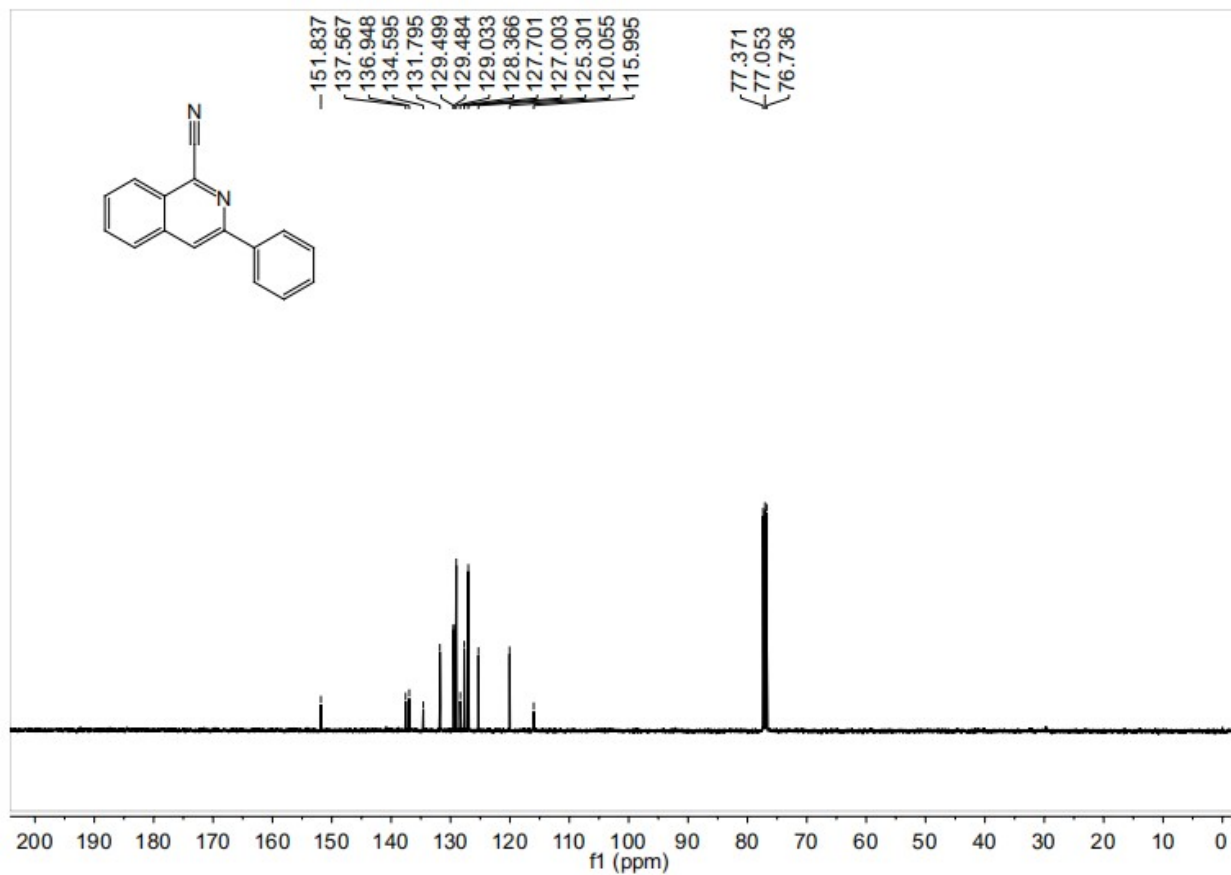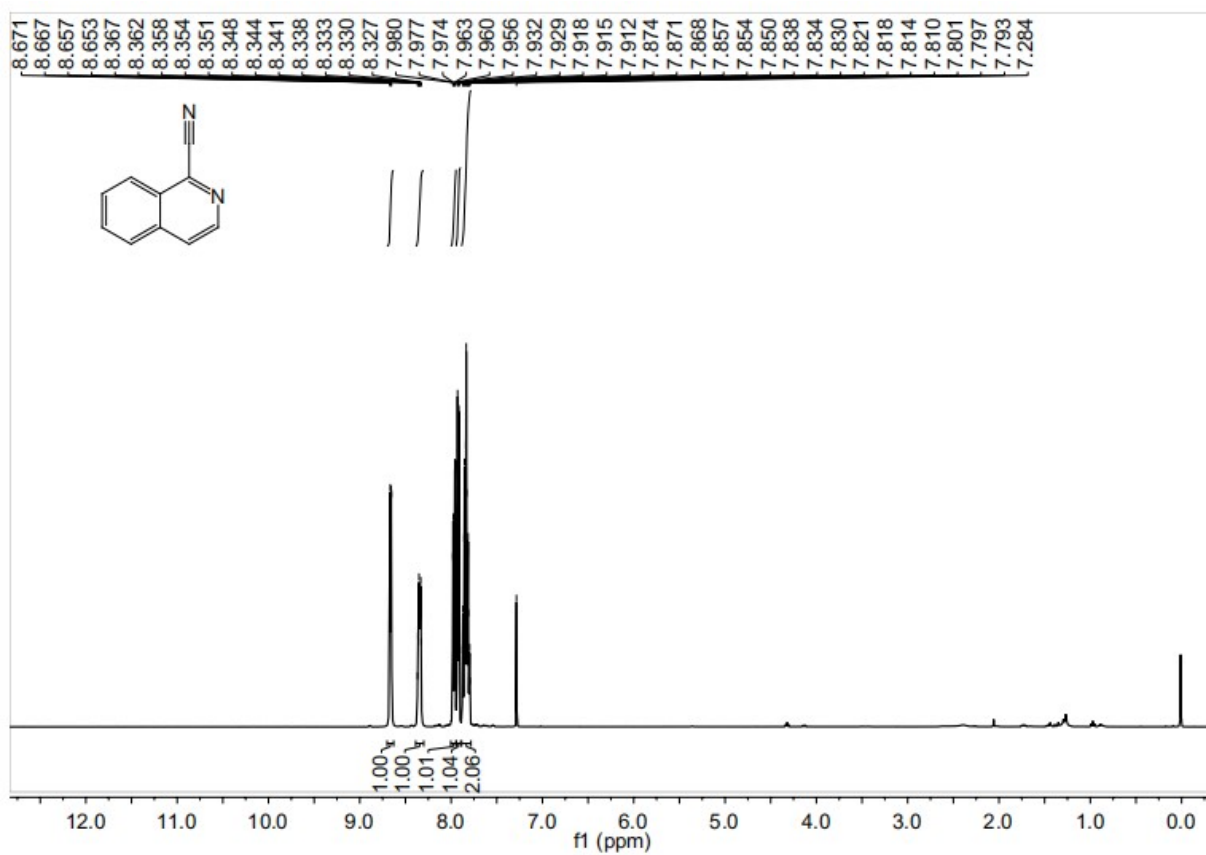



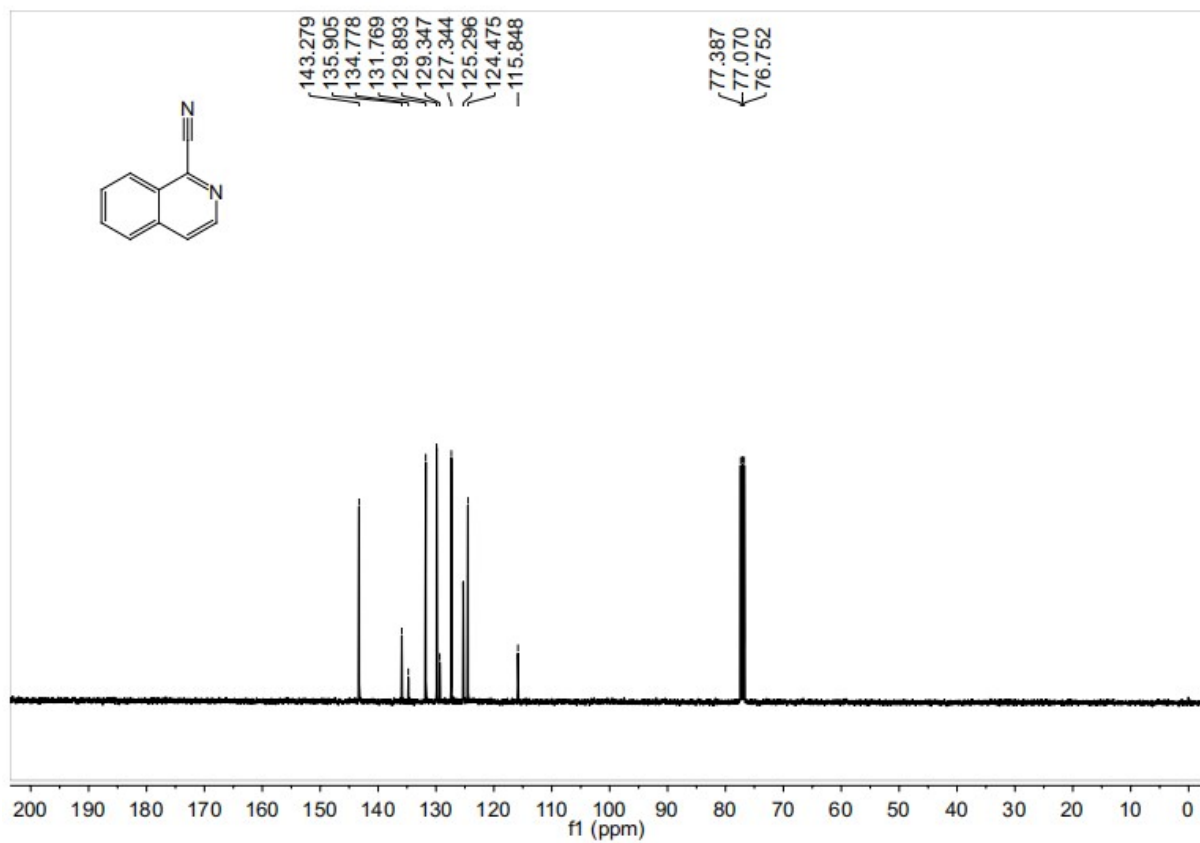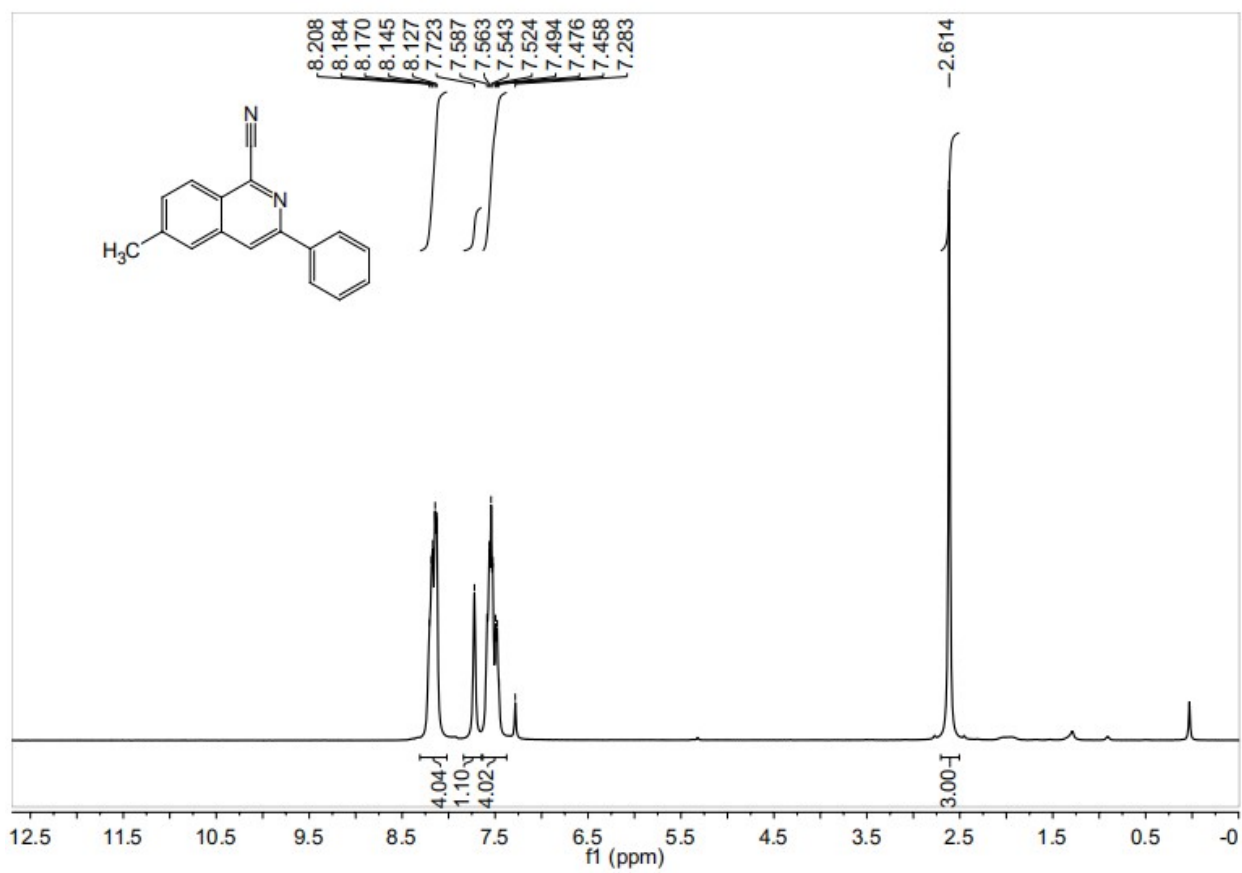

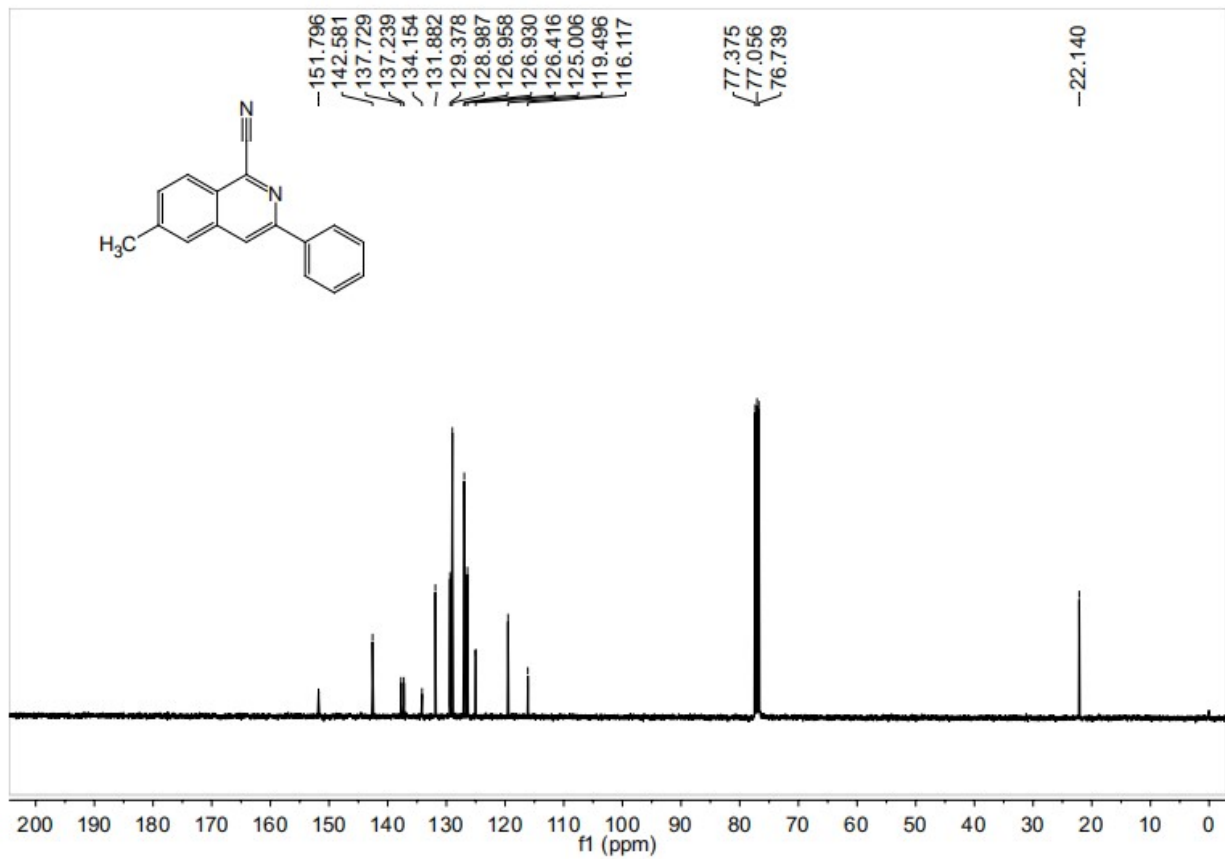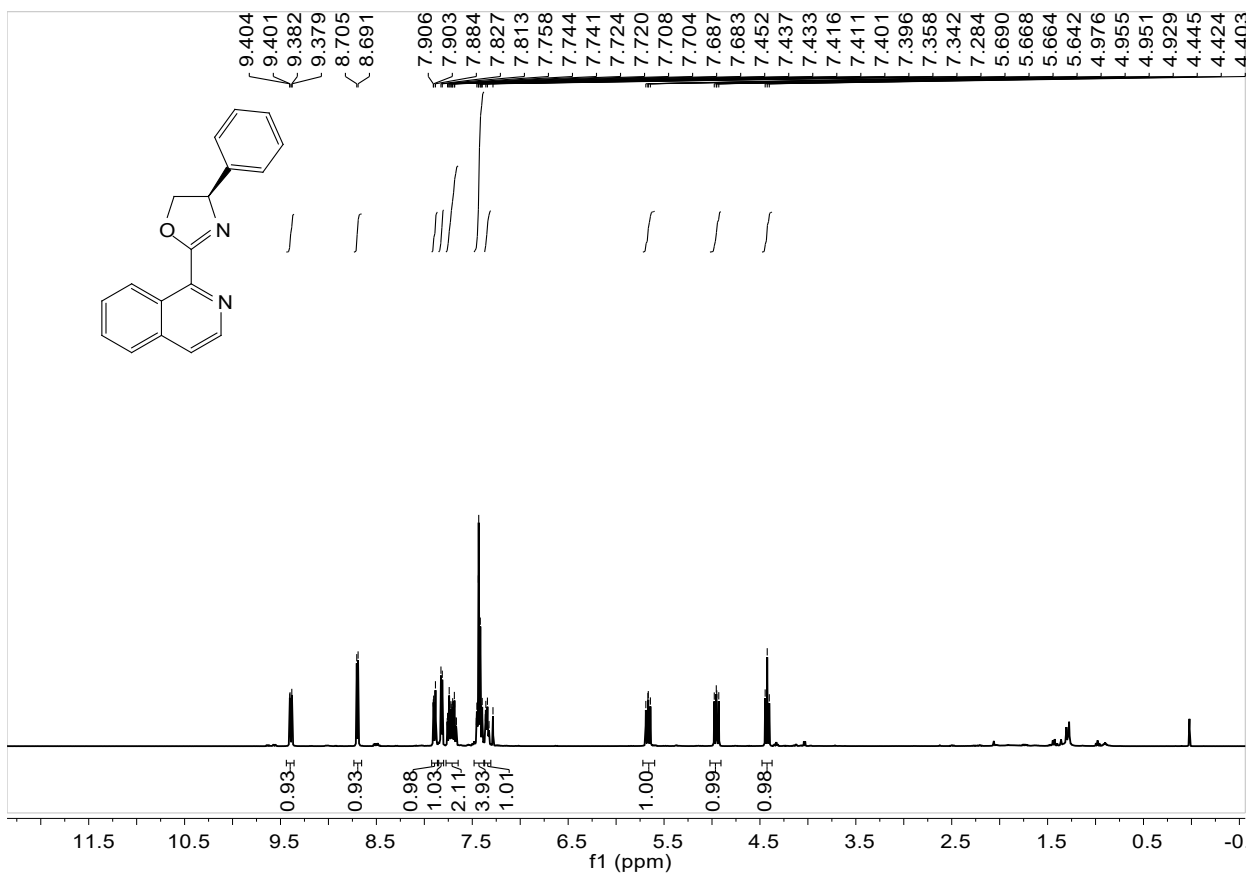

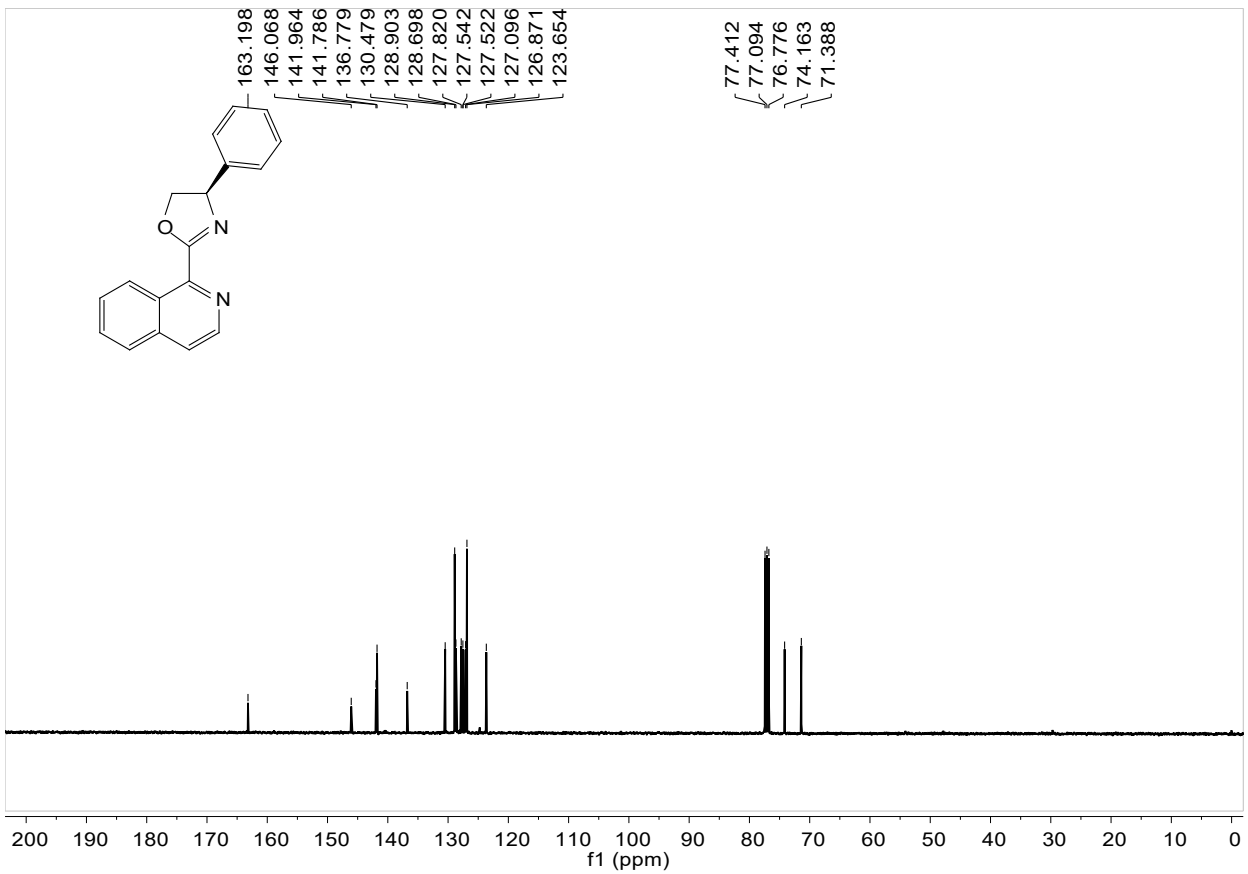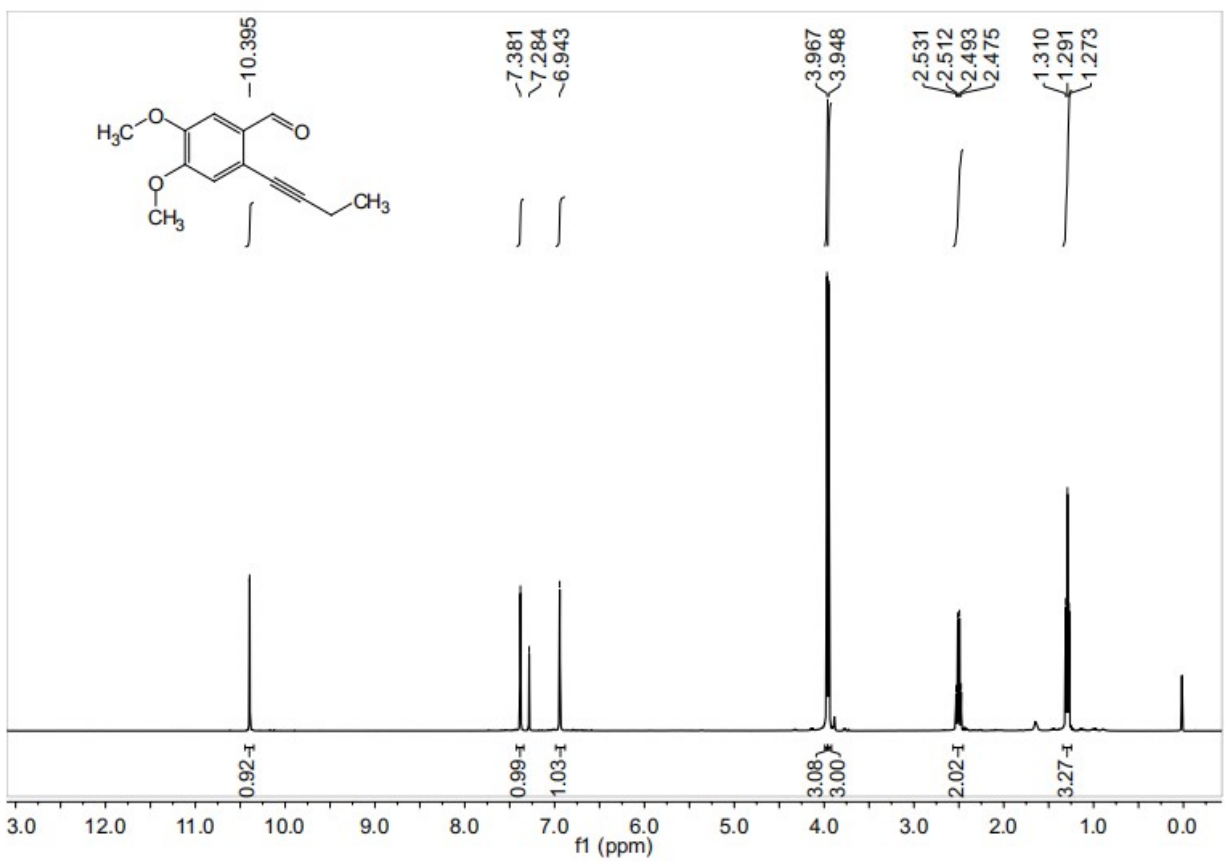

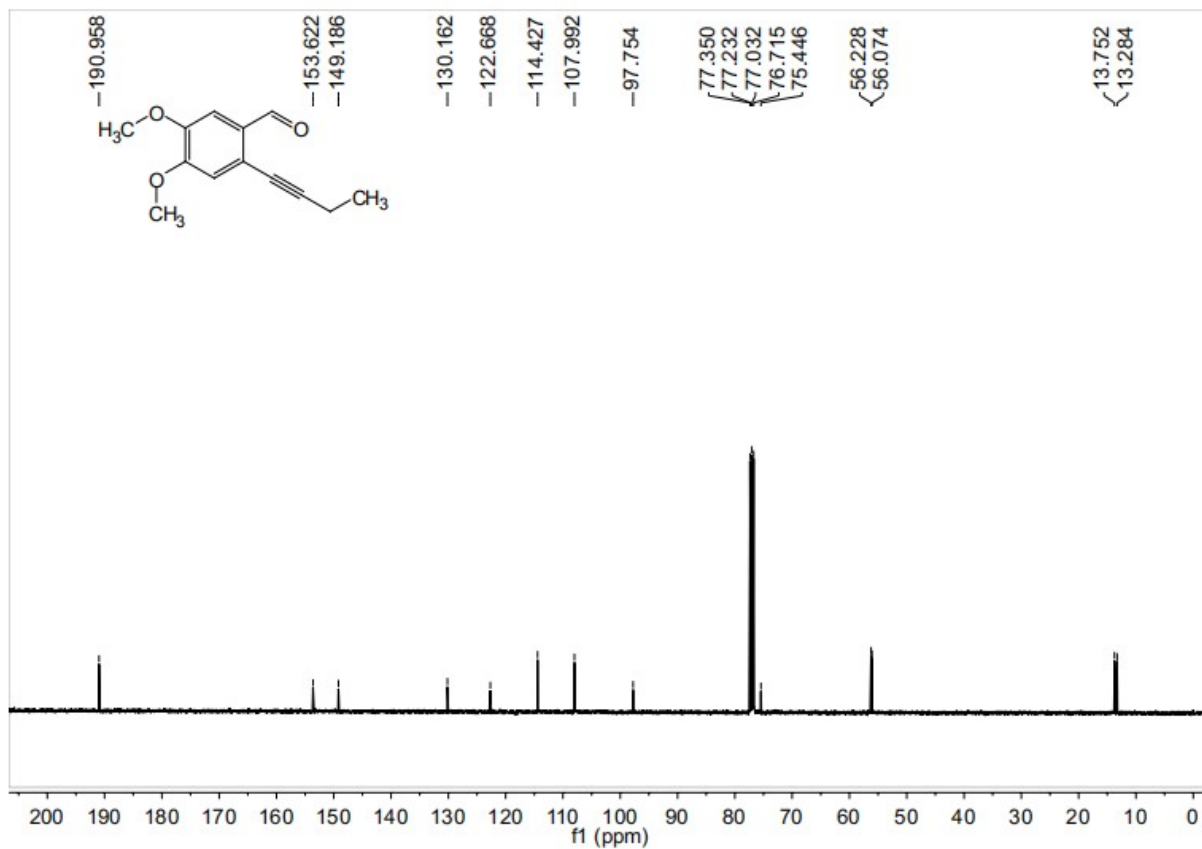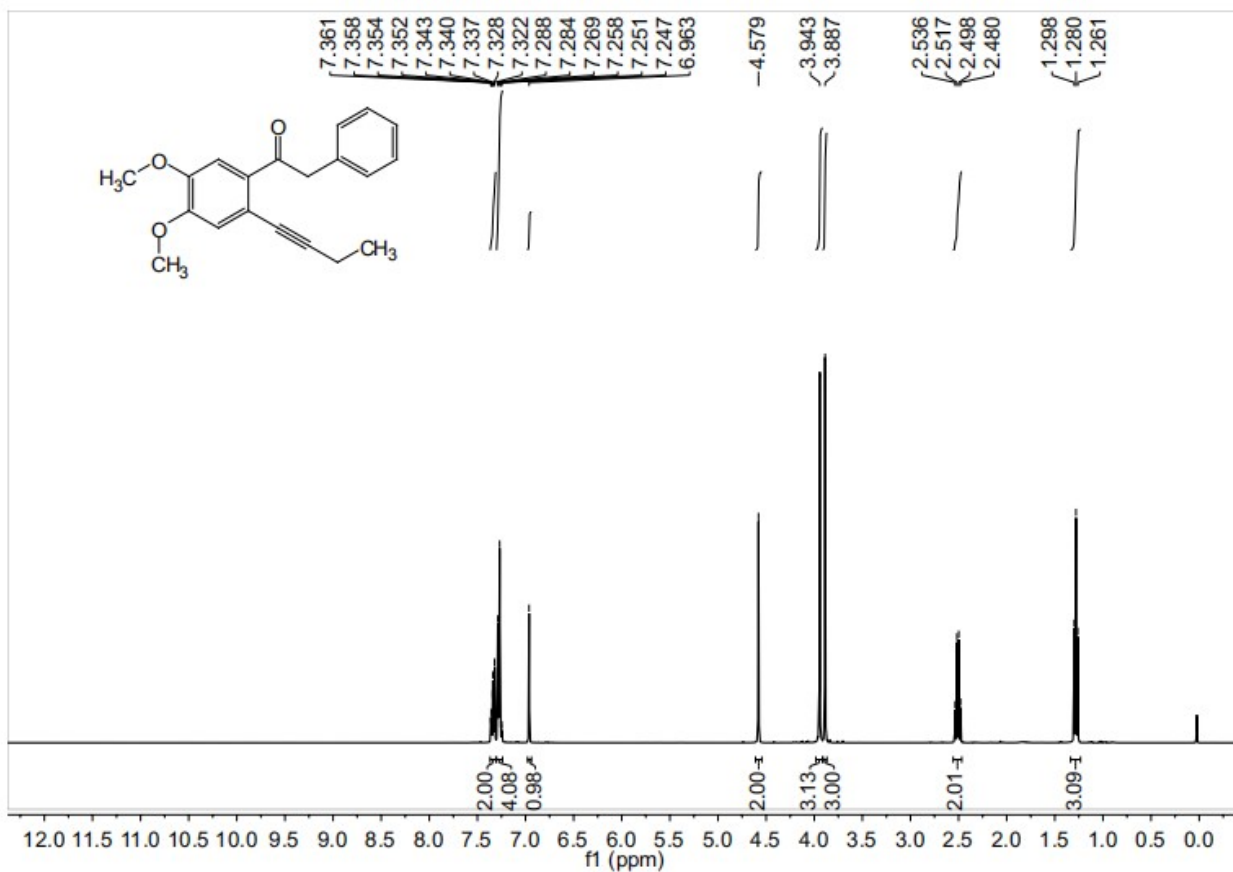

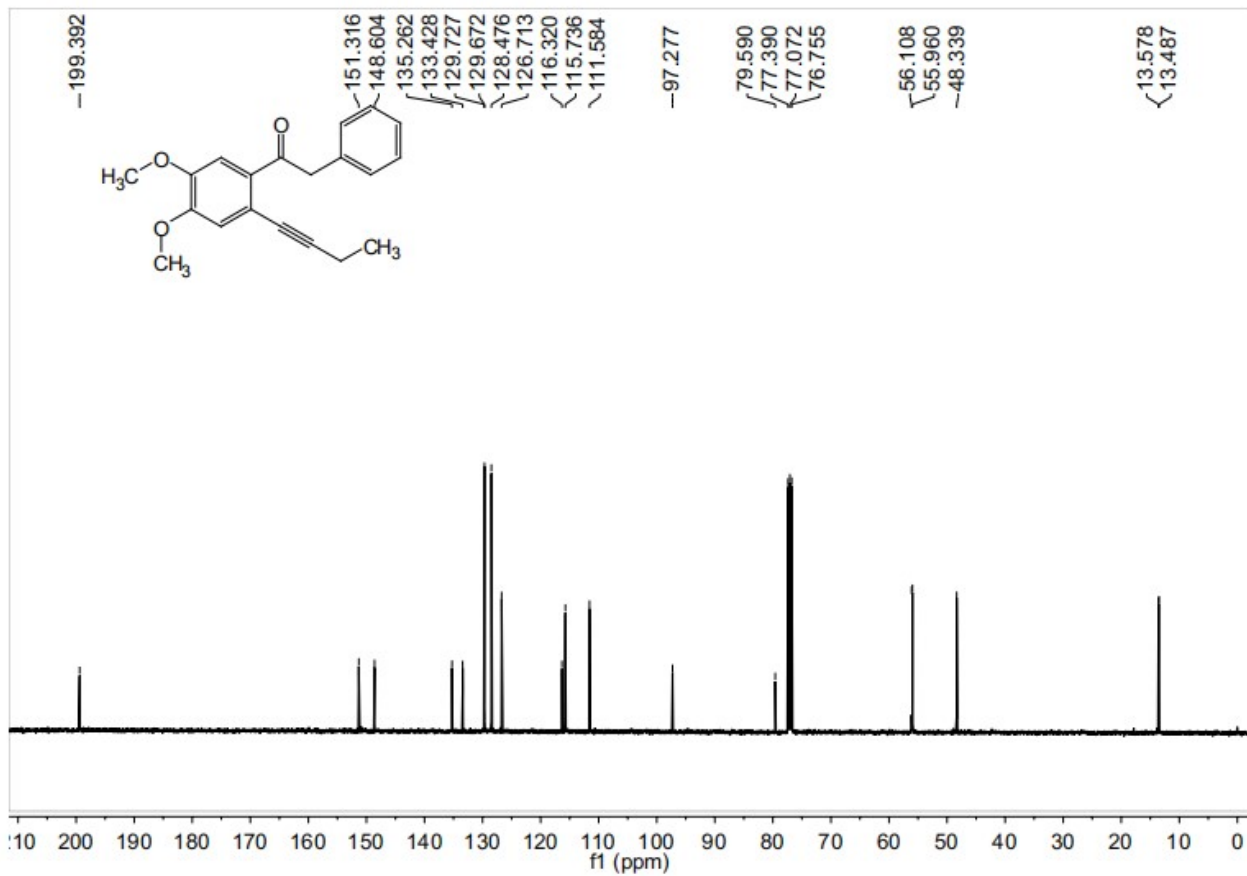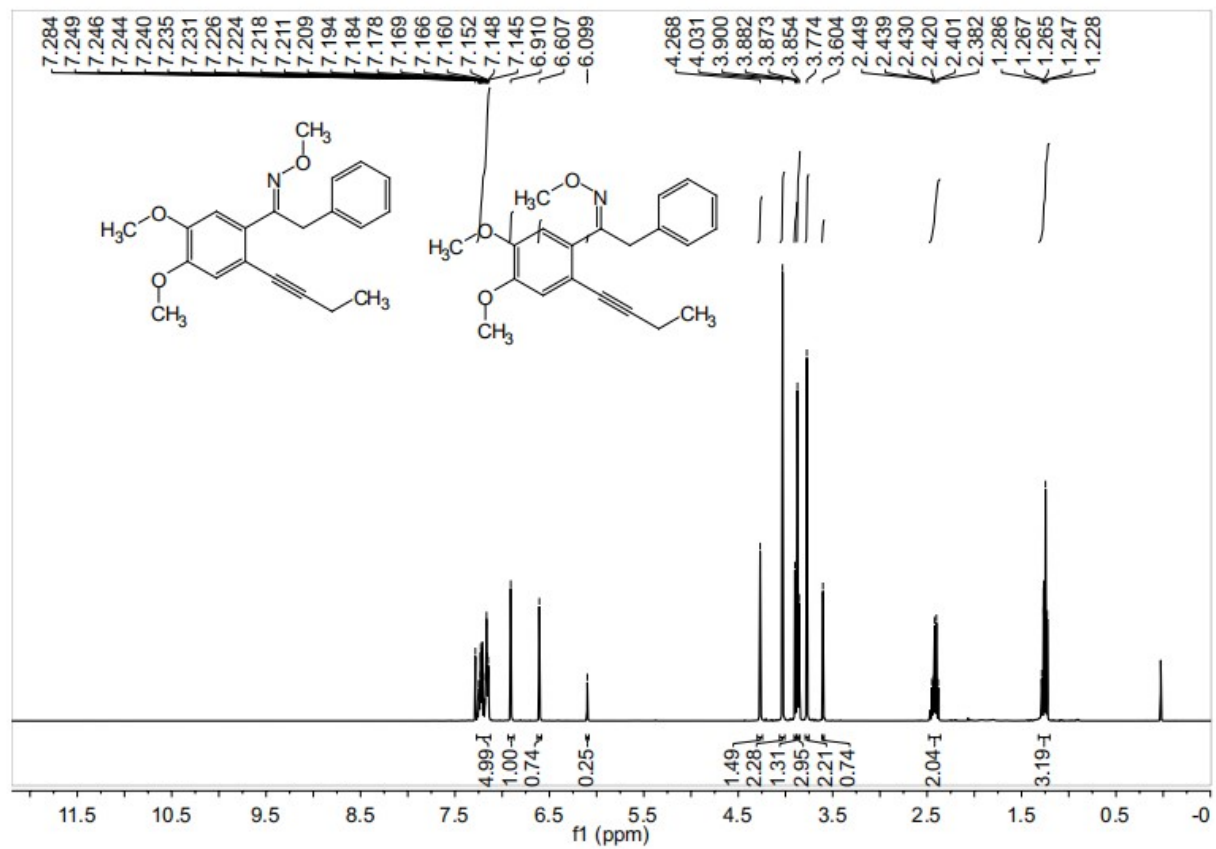

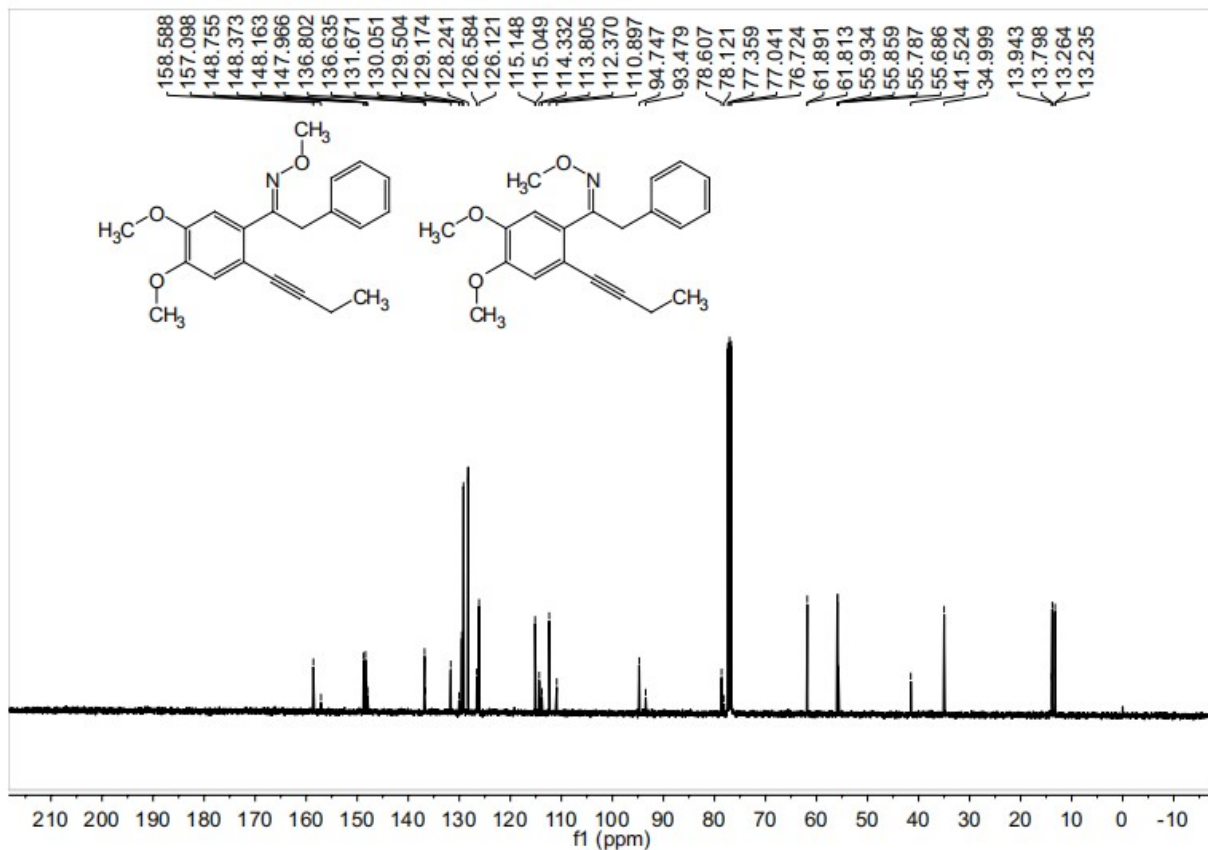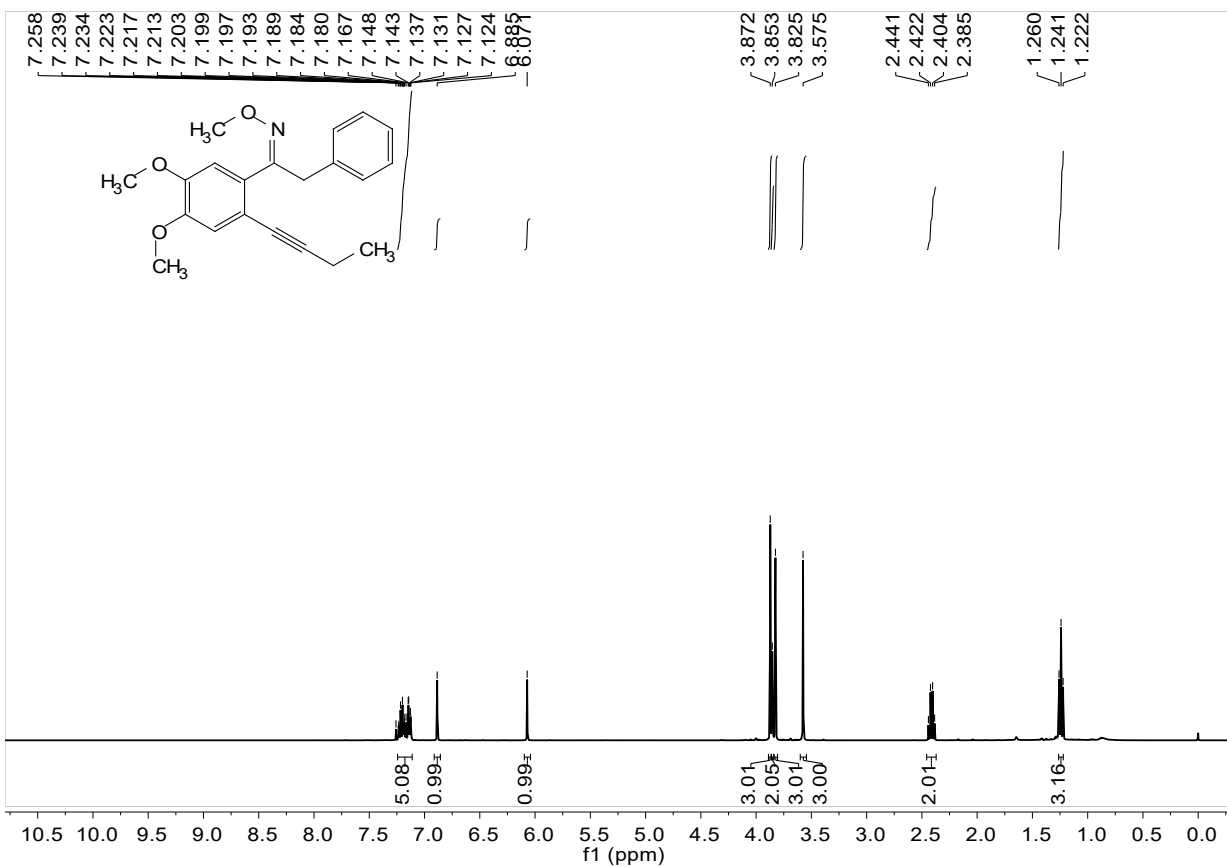

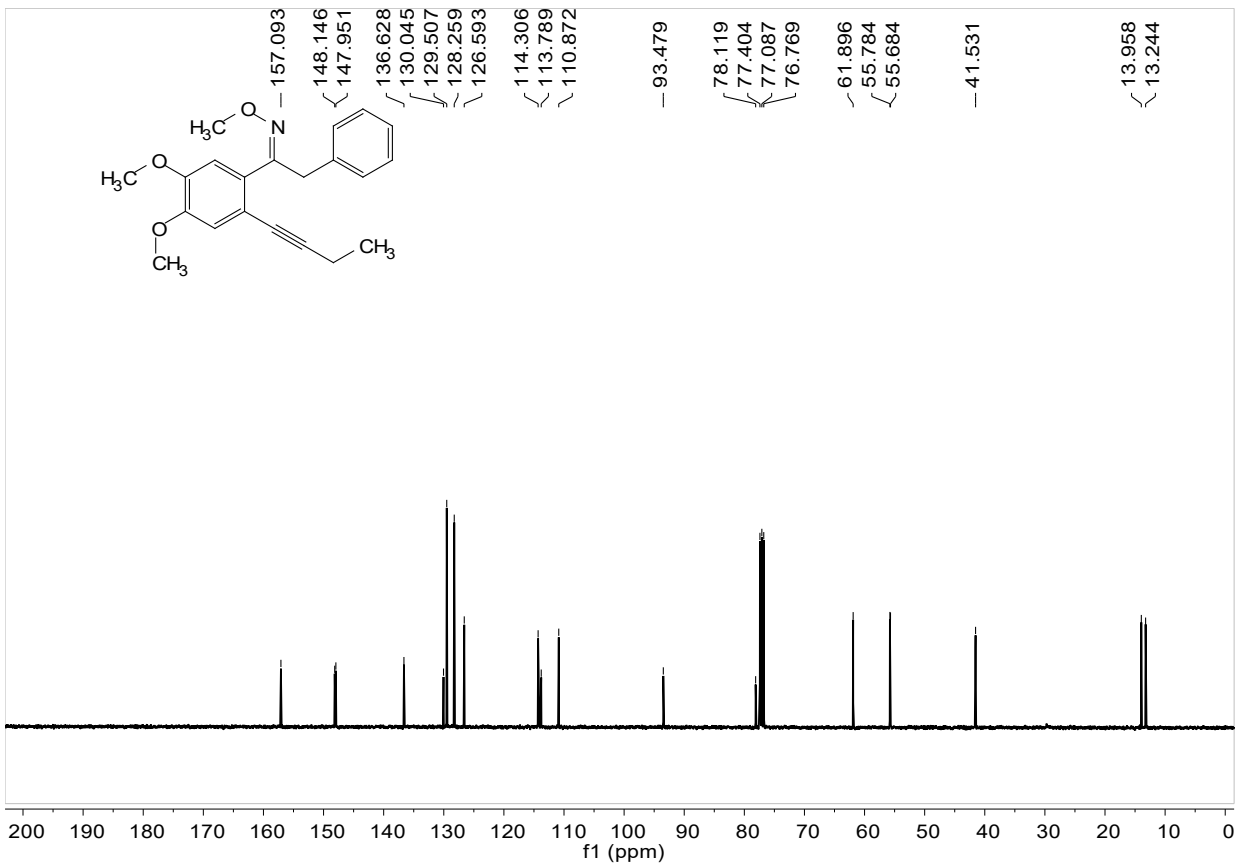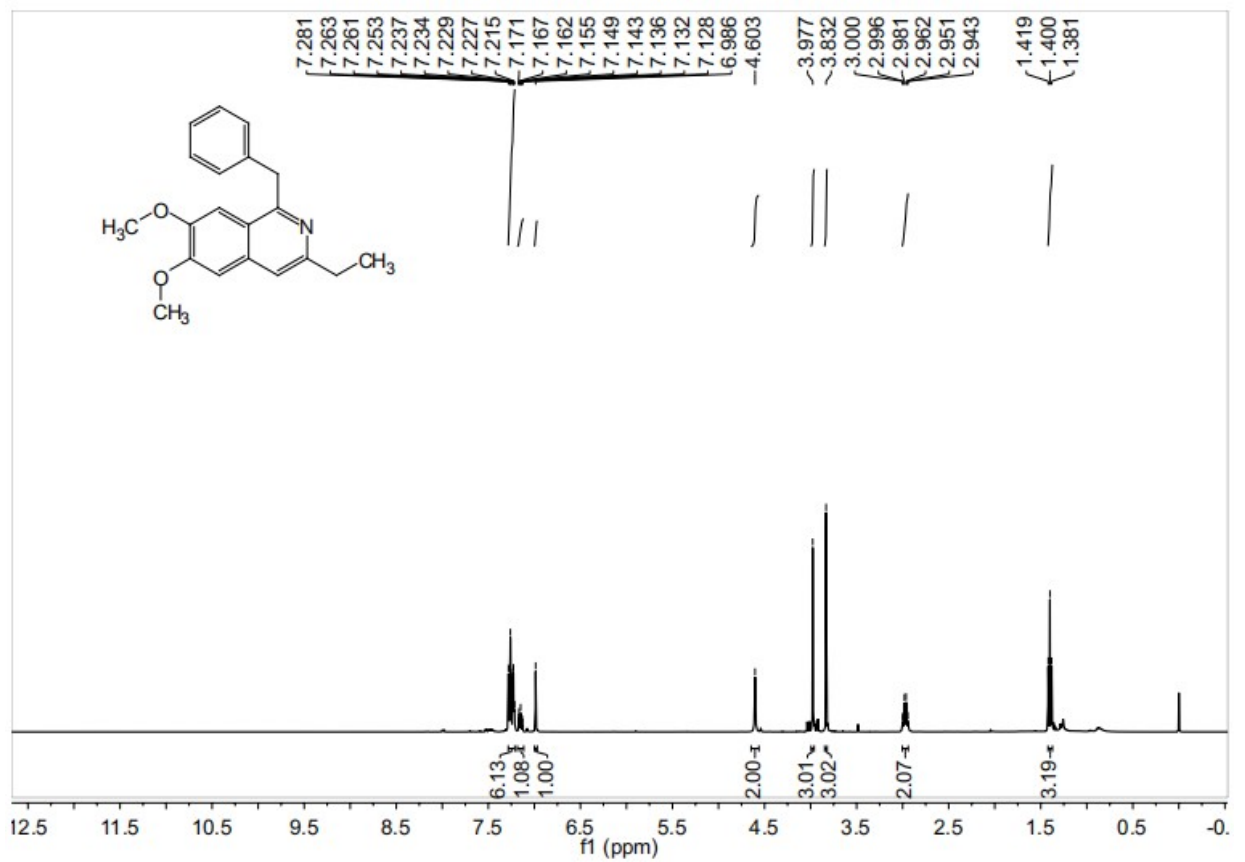

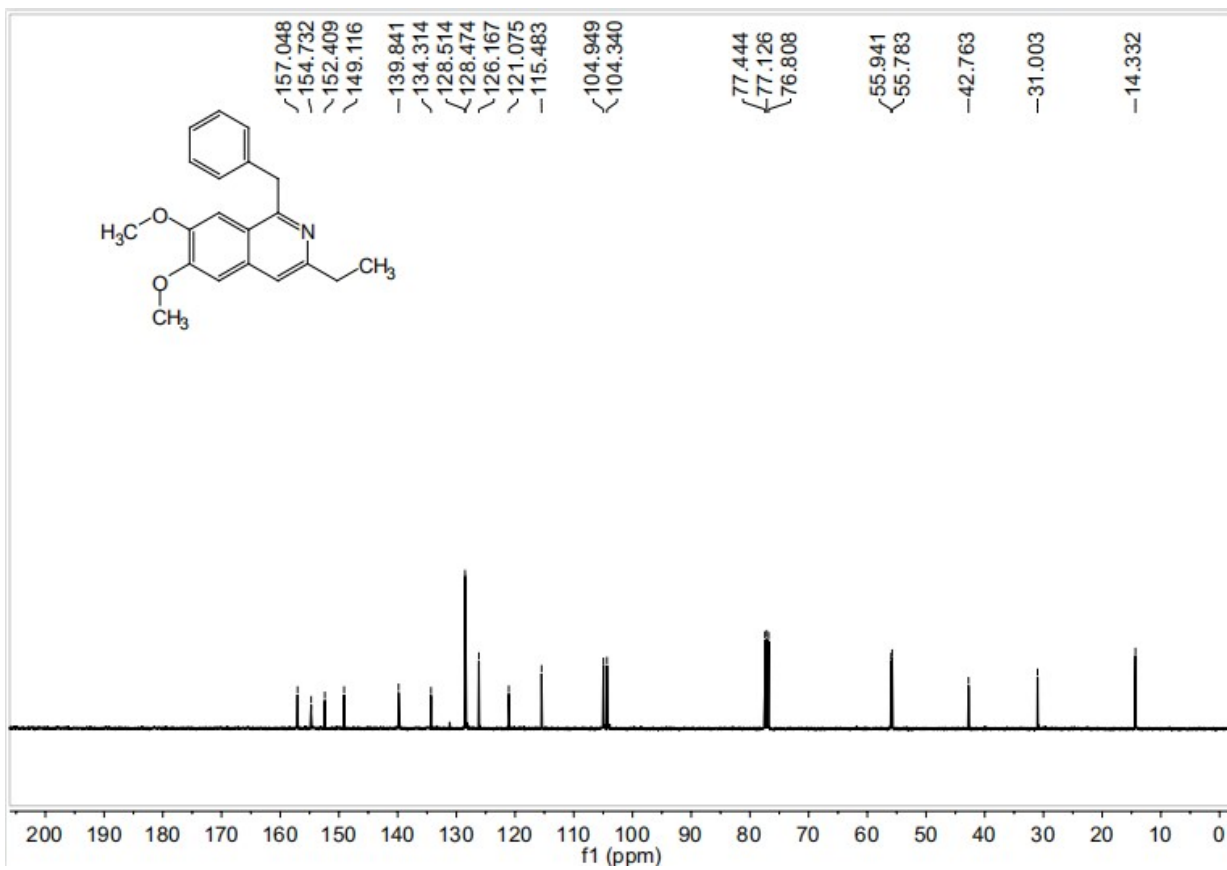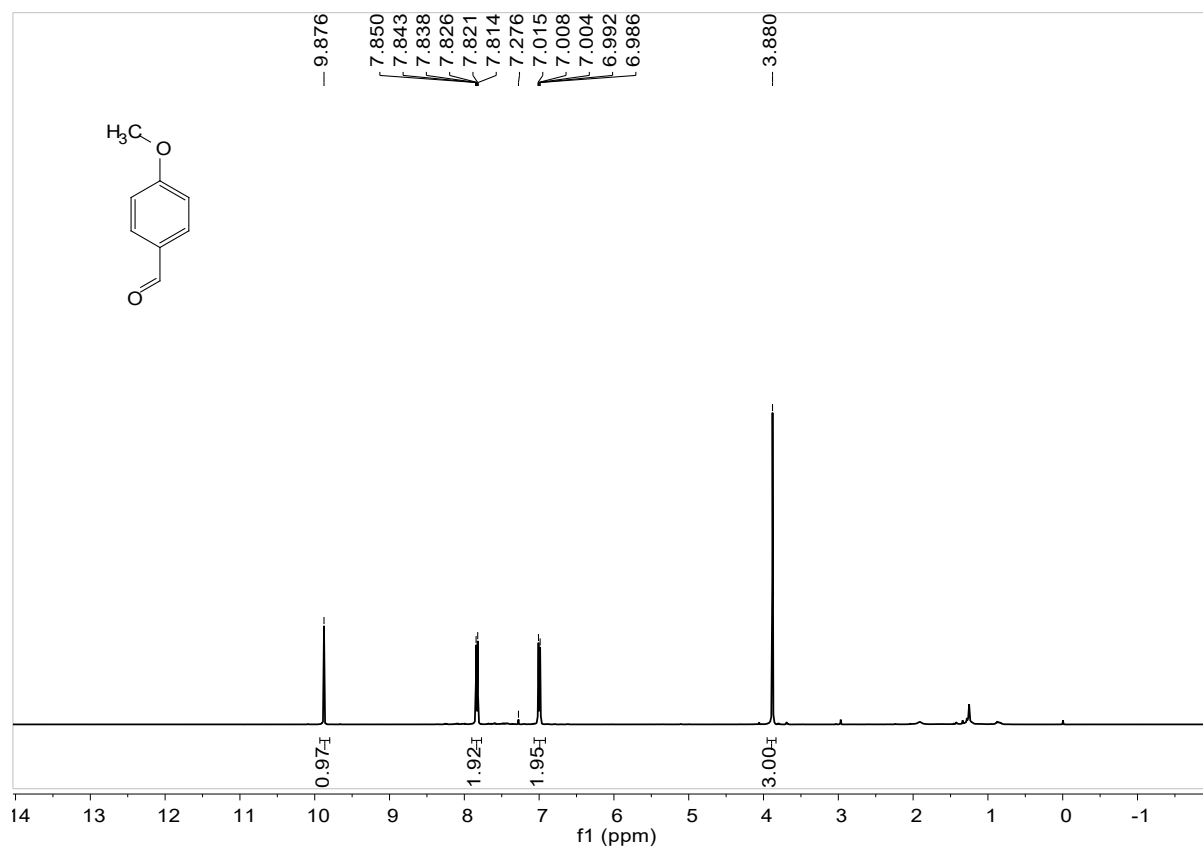



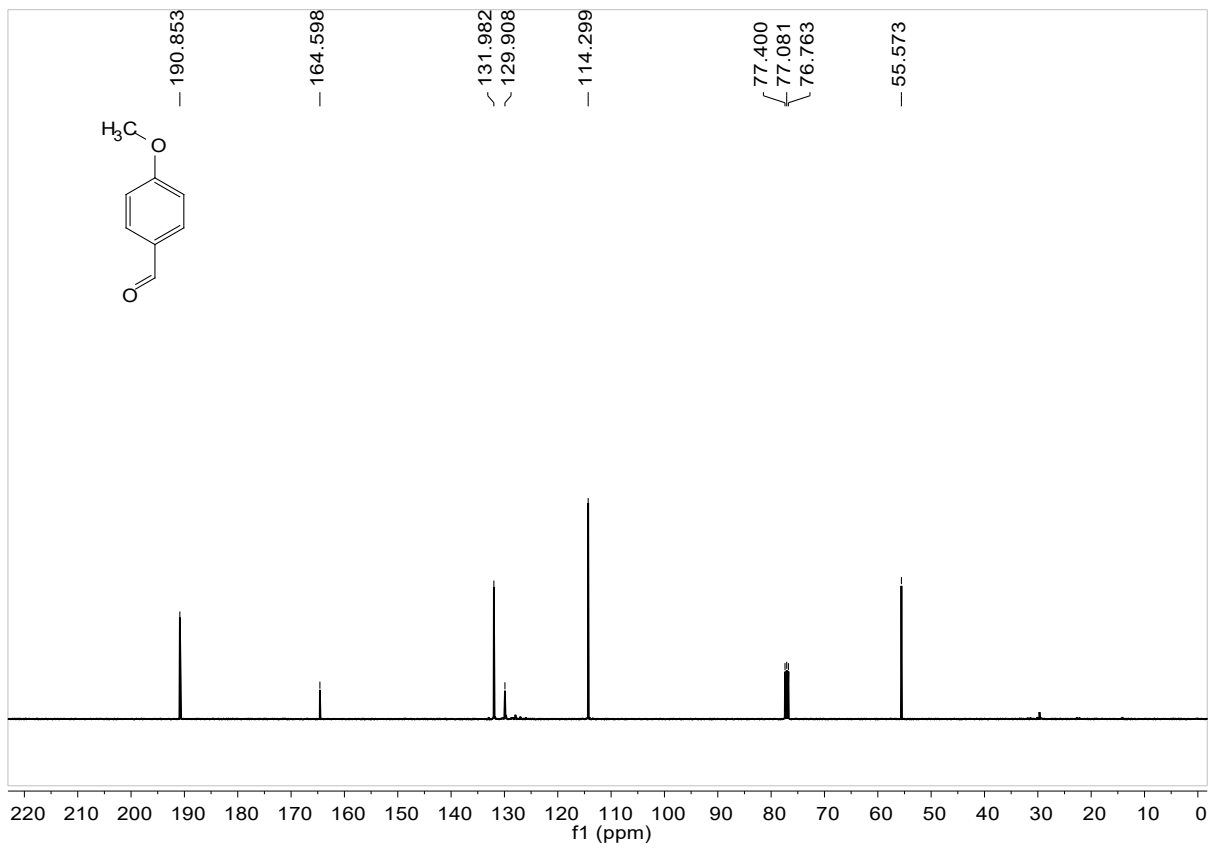

Supplement: d2ra06097c1.pdf [file d2ra06097c1.pdf]
